# Supplementary material for: Transcriptomic Responses Underlying the High Virulence of Black Queen Cell Virus and Sacbrood Virus following a Change in Their Mode of Transmission in Honey Bees (Apis mellifera)
Source: Viruses. 2023 May 30;15(6):1284. doi: 10.3390/v15061284 (PMC10303220; doi:10.3390/v15061284)
Supplement: Supplementary file 1 [file viruses-15-01284-s001.zip]

Archive with 6 entries (6 files):
- S1_file_DESeq2_results_all comparsions.xlsx
- S2_file_functional enrichment_RJP.xlsx
- Supplementary materials_RJP.pdf
- Table S1_primers used.xlsx
- Table S2_DESeq2_count matrix_RJP.xlsx
- Table S3_mapping rates_RJP.xlsx
