# Supplementary material for: Transcriptomic Responses Underlying the High Virulence of Black Queen Cell Virus and Sacbrood Virus following a Change in Their Mode of Transmission in Honey Bees (Apis mellifera)
Source: Viruses. 2023 May 30;15(6):1284. doi: 10.3390/v15061284 (PMC10303220; doi:10.3390/v15061284)
Supplement: Supplementary file 1 [file viruses-15-01284-s001.zip › S1_file_DESeq2_results_all comparsions.xlsx]

## Sheet: Tab summary
File S1
DESeq2 results for each pairwise comparison with control, and the likelihood-ratio test
Differential gene expression tested between different treatments compared to control
Each tab shows the significantly differentially expressed genes for the following comparisons:
tab name	description
FPF vs Ctrl_up	genes up-regulated in bees exposed to Flupyradifuorane (FPF) insecticide vs control
FPF vs Ctrl_down	genes down-regulated in bees exposed to FPFvs control
VF vs Ctrl_up	genes up-regulated in bees inoculated BQCV/SBV by feeding vs control
VF vs Ctrl_down	genes down-regulated in bees inoculated BQCV/SBV by feeding vs control
VI vs Ctrl_up	genes up-regulated in bees inoculated BQCV/SBV by injection vs control
VI vs Ctrl_down	genes down-regulated in bees inoculated BQCV/SBV by feeding vs control
VF+FPF vs Ctrl_up	genes up-regulated in bees inoculated BQCV/SBV by feeding and exposed to FPF vs control
VF+FPF vs Ctrl_down	genes down-regulated in bees inoculated BQCV/SBV by feeding and exposed to FPF vs control
VI+FPF vs Ctrl_up	genes up-regulated in bees inoculated BQCV/SBV by injection and exposed to FPF vs control
VI+FPF vs Ctrl_down	genes down-regulated in bees inoculated BQCV/SBV by injection and exposed to FPF vs control
Columns in each tab show the following output from DESeq2:
baseMean	base mean expression over all samples
log2FoldChange	log2 fold change
lfcSE	standard error
stat	Wald statistic
pvalue	Wald test p-value
padj	BH adjusted p-value

## Sheet: FPF vs Ctrl_up
Gene_ID	baseMean	log2FoldChange	lfcSE	stat	pvalue	padj

## Sheet: FPF vs Ctrl_down
Gene_ID	baseMean	log2FoldChange	lfcSE	stat	pvalue	padj

## Sheet: VF vs Ctrl-up
Gene_ID	baseMean	log2FoldChange	lfcSE	stat	pvalue	padj
LOC102655890	5.33504	2.14319	0.709918	3.01893	0.00253673	0.0196355
LOC107963975	894.144	2.6369	0.771269	3.41891	0.000628725	0.00814029
LOC107964805	11.447	2.14492	0.470823	4.55568	5.22e-06	0.00035322
LOC113218760	60.8519	5.46926	1.11977	4.88428	1.04e-06	0.000116753
LOC725754	229.597	2.15075	0.374941	5.73624	9.68e-09	4.12e-06
Oa1	398.067	2.41607	0.350774	6.88781	5.67e-12	2.64e-08

## Sheet: VF vs Ctrl-down
Gene_ID	baseMean	log2FoldChange	lfcSE	stat	pvalue	padj
LOC102654331	2.29309	-2.3486	0.670789	-3.50124	0.000463095	0.00654999
LOC727649	29.747	-2.25763	0.621608	-3.63191	0.000281329	0.00466204

## Sheet: VI vs Ctrl-up
Gene_ID	baseMean	log2FoldChange	lfcSE	stat	pvalue	padj
Apid1	8868.27	3.71022	0.815433	4.55	5.36e-06	6.96e-05
CPR1	2.83784	2.56985	0.70434	3.64859	0.000263684	0.00152158
LOC100576169	447.378	2.12301	0.333996	6.35638	2.07e-10	2.16e-08
LOC100576370	1.6475	2.32464	0.943378	2.46416	0.0137333	0.036223
LOC100576592	711.524	2.13286	0.417517	5.10843	3.25e-07	7.76e-06
LOC100576839	3.66789	2.16098	0.867889	2.48993	0.012777	0.0344054
LOC100576948	94.2487	2.17615	0.405893	5.36138	8.26e-08	2.72e-06
LOC100577132	2.04747	3.05779	0.868281	3.52166	0.000428855	0.00226606
LOC100577135	156.004	3.11743	0.423566	7.35996	1.84e-13	4.87e-11
LOC100577381	1.18607	2.57001	1.03604	2.48061	0.0131157	0.0349422
LOC100577430	502.09	2.28657	0.265121	8.62463	6.43e-18	6.13e-15
LOC100578156	251.351	3.05547	0.549764	5.55778	2.73e-08	1.14e-06
LOC100578352	6.58901	3.19953	0.647562	4.94088	7.78e-07	1.54e-05
LOC100578571	8.37856	2.17036	0.656074	3.3081	0.000939308	0.00424314
LOC102654166	953.929	2.06408	0.364117	5.66873	1.44e-08	6.95e-07
LOC102654436	92.1147	2.05763	0.429338	4.79256	1.65e-06	2.78e-05
LOC102654781	69.6069	2.39638	0.53637	4.46778	7.9e-06	9.38e-05
LOC102654799	2.98878	4.9508	1.06667	4.64135	3.46e-06	5.03e-05
LOC102655073	57.8882	2.35681	0.44396	5.30861	1.1e-07	3.42e-06
LOC102655202	3.27295	3.6395	1.19978	3.03346	0.00241769	0.00906109
LOC102656101	37.4759	2.7596	0.859683	3.21003	0.00132723	0.00562228
LOC102656154	22.2034	2.8825	0.644305	4.47381	7.68e-06	9.23e-05
LOC107963975	894.144	5.22955	0.836002	6.25542	3.96e-10	3.63e-08
LOC107964006	50.0892	2.12614	0.344448	6.17259	6.72e-10	5.52e-08
LOC107964189	91.9687	2.03503	0.502268	4.05167	5.09e-05	0.000408838
LOC107964335	4.00427	3.44808	0.923269	3.73465	0.00018798	0.00116539
LOC107964671	31.4929	2.34908	0.401399	5.85223	4.85e-09	2.96e-07
LOC107964791	6.60963	2.62653	0.668959	3.92629	8.63e-05	0.00062498
LOC107964805	11.447	2.15692	0.516082	4.17942	2.92e-05	0.000265678
LOC113218760	60.8519	6.28946	1.20046	5.2392	1.61e-07	4.66e-06
LOC113218818	3.94911	2.57064	0.783651	3.28034	0.00103684	0.00461156
LOC113218900	11.196	4.25748	0.806356	5.27989	1.29e-07	3.87e-06
LOC113218934	5.18376	2.14361	0.605401	3.5408	0.000398909	0.00214228
LOC113219343	2.19734	2.84158	0.976303	2.91055	0.00360799	0.0125358
LOC406142	5657.84	2.68824	0.835507	3.21749	0.00129316	0.00549507
LOC406144	2239.01	2.26371	0.64221	3.52488	0.000423677	0.00224368
LOC408406	38.8578	2.76128	0.395494	6.98184	2.91e-12	5.34e-10
LOC408896	26.9966	2.19194	0.433648	5.05466	4.31e-07	9.64e-06
LOC409869	10.9612	2.00759	0.579934	3.46176	0.00053665	0.00272223
LOC410092	200.477	2.10587	0.307001	6.8595	6.91e-12	1.18e-09
LOC411290	360.955	2.52531	0.308956	8.17369	2.99e-16	1.42e-13
LOC411577	1051.73	2.72843	0.273167	9.98812	1.72e-23	4.09e-20
LOC411599	1374.68	2.9089	0.453869	6.40911	1.46e-10	1.58e-08
LOC411894	119.209	3.12478	0.470462	6.64193	3.1e-11	4.34e-09
LOC412813	8.25927	2.2434	0.498042	4.50444	6.65e-06	8.23e-05
LOC413040	54.5425	2.75402	0.447109	6.15961	7.29e-10	5.84e-08
LOC413128	292.257	2.04765	0.343303	5.96454	2.45e-09	1.67e-07
LOC552311	119.85	2.25518	0.366206	6.15822	7.36e-10	5.84e-08
LOC724379	83.3443	2.45385	0.279143	8.79067	1.49e-18	1.77e-15
LOC724395	1.5279	2.8995	0.978617	2.96286	0.00304797	0.0109621
LOC724398	30.4942	2.34733	0.335775	6.9908	2.73e-12	5.21e-10
LOC724521	6.03414	3.69882	0.788283	4.69225	2.7e-06	4.11e-05
LOC724645	1.79495	2.43316	0.887998	2.74005	0.00614292	0.0191504
LOC724664	4.17951	2.46938	0.805988	3.0638	0.00218548	0.00832842
LOC724803	8.07628	2.37514	0.664326	3.57526	0.000349878	0.00191899
LOC725273	168.962	2.641	0.389842	6.77454	1.25e-11	1.86e-09
LOC725408	10.8846	2.46465	0.5354	4.60337	4.16e-06	5.8e-05
LOC725629	31.1441	4.50457	0.838165	5.37432	7.69e-08	2.57e-06
LOC725754	229.597	2.76938	0.406198	6.81779	9.25e-12	1.47e-09
LOC726766	617.03	2.17801	0.205374	10.6051	2.82e-26	1.34e-22
LOC727546	110.921	2.72578	0.60546	4.502	6.73e-06	8.31e-05
nAChRa9	319.963	2.12758	0.383153	5.55283	2.81e-08	1.15e-06
nAChRb2	140.426	2.83902	0.441568	6.42941	1.28e-10	1.42e-08
Obp9	104.93	3.6098	0.568301	6.35192	2.13e-10	2.2e-08
Y-e3	117.197	2.35558	0.465731	5.05781	4.24e-07	9.55e-06

## Sheet: VI vs Ctrl-down
Gene_ID	baseMean	log2FoldChange	lfcSE	stat	pvalue	padj
Amel_8916	11.26	-2.00057	0.495817	-4.03489	5.46e-05	0.00043261
Apamin	1222.54	-5.51123	0.4425	-12.4548	1.32e-35	1.26e-31
Apd-3	3443.99	-2.94789	0.478698	-6.15814	7.36e-10	5.84e-08
Est-6	11.253	-2.30054	0.792155	-2.90416	0.00368245	0.0127296
Eth	7.55556	-2.71477	0.678223	-4.00277	6.26e-05	0.000484524
LOC100576361	3.28444	-2.00197	0.712337	-2.81043	0.00494752	0.0161698
LOC100576444	141.52	-2.3718	0.620455	-3.82269	0.000132006	0.000880689
LOC100576584	1.51733	-3.3139	1.03344	-3.20667	0.0013428	0.00567309
LOC100576767	1.53003	-2.52012	1.01432	-2.48454	0.0129719	0.0346754
LOC100576797	1504.3	-5.21409	0.816899	-6.38279	1.74e-10	1.86e-08
LOC100576881	3.69379	-2.09363	0.741963	-2.82175	0.00477628	0.0156964
LOC100577359	4.46191	-2.78044	1.05179	-2.64352	0.00820479	0.0242604
LOC100577847	6.06328	-2.7918	0.833641	-3.34893	0.000811253	0.00376281
LOC100578609	2.11699	-2.89512	0.99962	-2.89622	0.00377685	0.013004
LOC102653899	127.834	-3.58572	0.863702	-4.15157	3.3e-05	0.000293455
LOC102654530	3.82961	-2.43356	0.77492	-3.1404	0.00168718	0.00673669
LOC102655153	12.6454	-2.37838	0.840045	-2.83126	0.00463652	0.0153589
LOC102655457	9.55864	-3.58527	1.05302	-3.40475	0.000662235	0.00322717
LOC102655636	2.77993	-2.50159	0.963689	-2.59585	0.0094357	0.0270439
LOC102656570	28.5334	-4.54185	1.31974	-3.44146	0.000578576	0.00290456
LOC102656595	1.6536	-2.61901	1.0031	-2.61091	0.00903011	0.0262105
LOC107965571	2.01274	-2.36189	0.993857	-2.37648	0.0174785	0.0440173
LOC107966055	93.7666	-2.08605	0.311145	-6.70443	2.02e-11	2.88e-09
LOC113218848	2.02493	-2.36505	1.01292	-2.33488	0.0195497	0.048364
LOC113218932	36.4198	-2.61057	0.794557	-3.28556	0.0010178	0.00454383
LOC113219028	2334.23	-2.26471	0.40219	-5.63094	1.79e-08	8.29e-07
LOC113219217	17.8831	-2.24625	0.480126	-4.67847	2.89e-06	4.34e-05
LOC113219328	12.7029	-2.06792	0.518047	-3.99177	6.56e-05	0.000502255
LOC406114	952.081	-3.44364	0.477385	-7.21355	5.45e-13	1.3e-10
LOC406145	134.025	-6.09823	0.840001	-7.25979	3.88e-13	9.6e-11
LOC408428	73.4005	-2.26911	0.284834	-7.96644	1.63e-15	6.22e-13
LOC408603	769.273	-2.957	0.450158	-6.56881	5.07e-11	6.44e-09
LOC409187	1995.06	-2.63184	0.356115	-7.39043	1.46e-13	3.98e-11
LOC409816	380.67	-2.02218	0.330457	-6.11934	9.4e-10	7.22e-08
LOC410202	3.20282	-2.27915	0.802718	-2.83929	0.00452142	0.0150666
LOC410254	173.675	-2.09831	0.229989	-9.1235	7.27e-20	1.15e-16
LOC410687	39.879	-2.48805	0.342039	-7.27418	3.49e-13	8.97e-11
LOC410747	759.326	-2.36317	0.755203	-3.12918	0.00175293	0.00696709
LOC411316	7.0325	-5.41485	0.935057	-5.79093	7e-09	3.97e-07
LOC411712	12.9766	-2.33861	0.614766	-3.80407	0.00014234	0.000931367
LOC412203	48.5272	-3.2463	0.818931	-3.96407	7.37e-05	0.000550574
LOC412969	48.4895	-2.67587	0.591475	-4.52407	6.07e-06	7.66e-05
LOC551910	8.72969	-3.36741	0.892892	-3.77136	0.000162363	0.00103881
LOC551991	35.2973	-2.33455	0.550789	-4.23855	2.25e-05	0.00021631
LOC552773	176.028	-2.68793	0.647788	-4.14941	3.33e-05	0.000295967
LOC678674	63.7585	-5.27026	0.885526	-5.95156	2.66e-09	1.75e-07
LOC724175	81.9294	-2.80572	0.547406	-5.12549	2.97e-07	7.23e-06
LOC724226	4.44519	-3.73103	0.976403	-3.8212	0.000132803	0.00088415
LOC724308	4191.72	-2.14418	0.37699	-5.68765	1.29e-08	6.39e-07
LOC724382	20.925	-2.6941	0.53636	-5.02294	5.09e-07	1.1e-05
LOC724436	134.182	-4.62805	0.800907	-5.77851	7.54e-09	4.14e-07
LOC724515	9.46568	-2.16255	0.840097	-2.57417	0.0100482	0.0283809
LOC724900	29.8643	-2.40169	0.486341	-4.93829	7.88e-07	1.55e-05
LOC724954	135.603	-2.11097	0.306805	-6.88051	5.96e-12	1.03e-09
LOC725019	3.72895	-2.40571	0.914667	-2.63015	0.00853469	0.0251267
LOC725500	191.303	-2.77044	0.297181	-9.32239	1.14e-20	2.17e-17
LOC725842	77.0374	-3.67944	0.87991	-4.1816	2.89e-05	0.000263389
LOC726236	36.3764	-2.14772	0.375211	-5.72403	1.04e-08	5.39e-07
LOC726863	10.4292	-2.03233	0.67686	-3.00258	0.00267702	0.00982814
LOC727037	96.3499	-2.34238	0.465909	-5.02755	4.97e-07	1.08e-05
LOC727618	1.64227	-2.90975	1.03119	-2.82175	0.00477629	0.0156964
Lop1	4140.97	-2.19404	0.391695	-5.60139	2.13e-08	9.51e-07
Mcdp	495.152	-6.30162	0.814648	-7.73539	1.03e-14	3.47e-12
Melt	13696.4	-5.4634	0.538973	-10.1367	3.8e-24	1.21e-20
Mrjp6	122.918	-2.2314	0.960689	-2.32271	0.0201949	0.049574
Obp13	2.56027	-2.85168	1.02576	-2.78006	0.00543495	0.0174617
Obp14	85.2604	-3.70957	0.94619	-3.92053	8.84e-05	0.000638164
Obp17	785.537	-2.55781	0.462122	-5.53493	3.11e-08	1.25e-06
Obp3	386.455	-2.41427	0.461883	-5.227	1.72e-07	4.87e-06
Pla2	608.899	-5.81637	0.687287	-8.4628	2.61e-17	1.78e-14
Vg	584.646	-3.29054	0.547436	-6.01083	1.85e-09	1.32e-07

## Sheet: VF+FPF vs Ctrl-up
Gene_ID	baseMean	log2FoldChange	lfcSE	stat	pvalue	padj
Apid1	8868.27	2.40267	0.729367	3.29418	0.000987091	0.00776284
LOC113218760	60.8519	5.02834	1.09169	4.60602	4.10441e-06	0.000163041
LOC113219273	1.91924	2.18701	0.71413	3.06249	0.00219507	0.0138452
LOC406142	5657.84	2.21504	0.747308	2.96403	0.00303639	0.0172413
LOC724113	5.54434	2.46866	0.696725	3.54324	0.000395243	0.00395455
LOC725087	4.32653	2.8478	0.965144	2.95064	0.00317112	0.0178759
Mrjp1	31.1967	2.35964	0.657897	3.58664	0.00033497	0.00352929
Mrjp5	64.9189	3.37916	0.858164	3.93767	8.22779e-05	0.00129377
Mrjp6	122.918	2.59847	0.835124	3.11148	0.00186153	0.0122548

## Sheet: VF+FPF vs Ctrl-down
Gene_ID	baseMean	log2FoldChange	lfcSE	stat	pvalue	padj
LOC107964997	5.31795	-2.23564	0.87977	-2.54117	0.0110483	0.0443405
LOC113218900	11.196	-2.98738	0.964055	-3.09877	0.00194328	0.0126503
LOC551562	86.5973	-2.08507	0.65515	-3.18258	0.0014597	0.0102995
LOC724239	2107.87	-2.59987	0.566712	-4.58763	4.48e-06	0.000174371
LOC726278	3.76488	-2.01707	0.427594	-4.71725	2.39e-06	0.00011033
Obp13	2.56027	-2.35273	0.69679	-3.37652	0.000734096	0.00624115

## Sheet: VI+FPF vs Ctrl-up
Gene_ID	baseMean	log2FoldChange	lfcSE	stat	pvalue	padj
5-ht7	4.42929	2.42059	0.516658	4.68509	2.8e-06	1.88e-05
Apid1	8868.27	3.8043	0.815433	4.66537	3.08e-06	2.03e-05
CPR1	2.83784	3.19492	0.686255	4.65559	3.23e-06	2.11e-05
CPR17	105.513	3.12109	0.360894	8.64822	5.23e-18	1.57e-15
LOC100576128	10.8514	2.4382	0.407085	5.98941	2.11e-09	4.11e-08
LOC100576169	447.378	2.58095	0.333774	7.73261	1.05e-14	1.24e-12
LOC100576194	4.66904	2.20161	0.564667	3.89896	9.66e-05	0.000408
LOC100576212	1.30614	2.97422	0.916839	3.24399	0.00117868	0.00355002
LOC100576223	23.4832	2.10835	0.272836	7.72754	1.1e-14	1.26e-12
LOC100576293	89.9606	2.2344	0.371805	6.0096	1.86e-09	3.72e-08
LOC100576370	1.6475	3.08857	0.907043	3.4051	0.0006614	0.00214522
LOC100576384	282.261	2.33414	0.410457	5.68668	1.3e-08	1.9e-07
LOC100576447	6.29816	2.00309	0.444167	4.50977	6.49e-06	3.84e-05
LOC100576476	8.94422	2.31429	0.387944	5.96553	2.44e-09	4.62e-08
LOC100576592	711.524	2.11377	0.417559	5.0622	4.14e-07	3.62e-06
LOC100576820	10.8208	2.03312	0.392674	5.17763	2.25e-07	2.15e-06
LOC100576839	3.66789	3.65185	0.832598	4.38609	1.15e-05	6.34e-05
LOC100576919	19.8953	2.24078	0.382313	5.86111	4.6e-09	7.93e-08
LOC100576948	94.2487	2.46899	0.405342	6.09114	1.12e-09	2.39e-08
LOC100576982	38.9343	2.88523	0.504254	5.72178	1.05e-08	1.6e-07
LOC100577039	3.20515	2.7178	0.808517	3.36147	0.000775291	0.00246937
LOC100577132	2.04747	3.33683	0.861703	3.87237	0.000107783	0.000447379
LOC100577135	156.004	2.8304	0.424098	6.67394	2.49e-11	9.87e-10
LOC100577151	1.15435	2.26934	0.952016	2.38372	0.0171384	0.0359971
LOC100577242	1132.3	2.07565	0.338269	6.13607	8.46e-10	1.92e-08
LOC100577381	1.18607	3.36138	0.988822	3.39938	0.000675382	0.00218343
LOC100577408	559.113	2.29032	0.271484	8.43632	3.27e-17	7.55e-15
LOC100577430	502.09	2.14877	0.265316	8.09892	5.54e-16	9.16e-14
LOC100577596	3.11412	2.26474	0.670556	3.3774	0.000731744	0.00234499
LOC100577719	57.8833	2.90852	0.353213	8.23446	1.8e-16	3.29e-14
LOC100577819	40.353	2.19988	0.861702	2.55295	0.0106815	0.0238297
LOC100577882	4.82056	3.51032	0.746361	4.70326	2.56e-06	1.74e-05
LOC100577908	2.31174	2.42759	0.689851	3.519	0.000433169	0.00149238
LOC100578044	0.755615	3.40587	1.1966	2.8463	0.00442308	0.011167
LOC100578072	1.50449	3.17234	1.10924	2.85991	0.00423755	0.0107754
LOC100578156	251.351	2.85586	0.549959	5.19287	2.07e-07	2e-06
LOC100578352	6.58901	3.36355	0.646715	5.20097	1.98e-07	1.92e-06
LOC100578515	189.032	2.06687	0.373769	5.52981	3.21e-08	4.13e-07
LOC100578540	22.1098	2.76429	0.472438	5.85113	4.88e-09	8.29e-08
LOC100578651	1.42745	2.02086	0.788927	2.56152	0.0104214	0.0233282
LOC100578885	108.3	2.11938	0.40101	5.28511	1.26e-07	1.31e-06
LOC100578939	96.6902	2.2081	0.320574	6.88797	5.66e-12	2.79e-10
LOC102653673	7.76009	2.37437	0.484783	4.8978	9.69e-07	7.53e-06
LOC102653797	5.20571	2.21151	0.569979	3.87998	0.000104466	0.000436518
LOC102653857	9.22659	3.11024	0.527653	5.89449	3.76e-09	6.65e-08
LOC102654069	47.1885	2.06749	0.260458	7.93793	2.06e-15	3e-13
LOC102654166	953.929	2.23076	0.364097	6.12684	8.96e-10	2.01e-08
LOC102654184	68.8447	2.11122	0.305725	6.90562	5e-12	2.57e-10
LOC102654965	6.23934	2.93583	0.569673	5.15353	2.56e-07	2.38e-06
LOC102654968	48.4667	2.81436	0.419041	6.7162	1.87e-11	7.71e-10
LOC102655073	57.8882	2.99977	0.442215	6.7835	1.17e-11	5.1e-10
LOC102655202	3.27295	2.97028	1.21538	2.44392	0.0145286	0.0310897
LOC102655228	56.4468	2.09051	0.4351	4.80466	1.55e-06	1.13e-05
LOC102655268	14.3597	3.87465	0.526343	7.36144	1.82e-13	1.48e-11
LOC102655639	21.3937	2.03028	0.371556	5.46427	4.65e-08	5.71e-07
LOC102655889	5.35078	2.36451	0.703312	3.36196	0.000773921	0.00246659
LOC102655890	5.33504	2.5124	0.771011	3.25857	0.00111974	0.00339829
LOC102656070	29.112	2.09893	0.480986	4.3638	1.28e-05	6.95e-05
LOC102656101	37.4759	2.46863	0.860996	2.86718	0.00414149	0.0105882
LOC102656154	22.2034	2.20162	0.649397	3.39026	0.000698263	0.00225079
LOC102656170	1.69695	3.81406	0.906122	4.20921	2.56e-05	0.000128354
LOC102656198	1.67189	2.46079	0.83785	2.93703	0.00331368	0.00875638
LOC102656639	5.27161	2.53388	0.657191	3.85562	0.000115439	0.000473213
LOC102656747	1.83345	2.52971	0.98584	2.56604	0.0102866	0.0230628
LOC102656805	1.20745	3.02854	0.99729	3.03677	0.00239127	0.00661705
LOC102656830	2.54915	2.13327	0.782867	2.72494	0.00643131	0.0154501
LOC107963975	894.144	4.8371	0.836048	5.78567	7.22e-09	1.16e-07
LOC107964006	50.0892	2.24741	0.344339	6.52674	6.72e-11	2.31e-09
LOC107964189	91.9687	3.01212	0.500388	6.01957	1.75e-09	3.52e-08
LOC107964335	4.00427	5.14876	0.890312	5.78309	7.33e-09	1.17e-07
LOC107964671	31.4929	2.58617	0.400569	6.45624	1.07e-10	3.41e-09
LOC107964765	0.904806	3.12252	1.14429	2.72879	0.00635673	0.0152895
LOC107964791	6.60963	3.42028	0.657282	5.20367	1.95e-07	1.9e-06
LOC107965102	0.618248	3.23037	1.099	2.93938	0.00328867	0.00869958
LOC107966074	0.885711	3.24123	0.98437	3.2927	0.000992307	0.00306888
LOC113218760	60.8519	6.32831	1.20056	5.27115	1.36e-07	1.4e-06
LOC113218818	3.94911	3.36708	0.766705	4.39163	1.13e-05	6.2e-05
LOC113218900	11.196	3.54622	0.812192	4.36623	1.26e-05	6.89e-05
LOC113218902	1.17971	2.59146	1.01699	2.54817	0.0108289	0.0240991
LOC113218934	5.18376	3.06346	0.579592	5.28555	1.25e-07	1.31e-06
LOC113218951	4.20656	3.89991	0.68324	5.70797	1.14e-08	1.72e-07
LOC113218982	199.14	2.76172	0.4017	6.87508	6.2e-12	3e-10
LOC113219343	2.19734	4.44607	0.920309	4.83106	1.36e-06	1.01e-05
LOC113219398	13.1302	3.19056	0.607489	5.25204	1.5e-07	1.52e-06
LOC406142	5657.84	2.93577	0.835504	3.51378	0.000441783	0.00151889
LOC406144	2239.01	2.61711	0.642193	4.07527	4.6e-05	0.000214283
LOC408306	354.168	2.0275	0.371818	5.45292	4.95e-08	6e-07
LOC408374	123.299	2.0858	0.409995	5.08739	3.63e-07	3.23e-06
LOC408406	38.8578	3.34675	0.393072	8.51434	1.68e-17	4.26e-15
LOC408438	221.654	2.28801	0.264747	8.64224	5.51e-18	1.61e-15
LOC408734	80.0265	2.44963	0.278112	8.80806	1.27e-18	4.51e-16
LOC408844	606.303	2.02543	0.371335	5.45447	4.91e-08	5.96e-07
LOC409159	58.0578	2.11275	0.227355	9.29275	1.5e-20	7.84e-18
LOC409714	346.533	2.14046	0.402073	5.32355	1.02e-07	1.09e-06
LOC409869	10.9612	2.59252	0.57239	4.52929	5.92e-06	3.56e-05
LOC410092	200.477	2.0786	0.307201	6.76625	1.32e-11	5.7e-10
LOC410235	45.6973	2.43187	0.438379	5.54741	2.9e-08	3.78e-07
LOC410423	569.501	2.00724	0.33659	5.96345	2.47e-09	4.66e-08
LOC410495	2.33403	2.69998	0.798793	3.38008	0.000724643	0.00232825
LOC410514	140.31	2.14127	0.376217	5.69157	1.26e-08	1.86e-07
LOC410624	35.3107	2.81161	0.385113	7.30073	2.86e-13	2.23e-11
LOC410638	386.387	2.5327	0.407511	6.21506	5.13e-10	1.27e-08
LOC410654	2.67134	4.12572	1.06881	3.86011	0.000113335	0.00046536
LOC410904	293.224	2.08603	0.263818	7.90706	2.64e-15	3.69e-13
LOC410975	10.5104	2.76686	0.427243	6.47607	9.41e-11	3.05e-09
LOC411038	93.0874	2.34002	0.37049	6.31603	2.68e-10	7.39e-09
LOC411053	607.394	2.19082	0.313141	6.99627	2.63e-12	1.51e-10
LOC411187	5.15769	3.50619	0.529874	6.61702	3.67e-11	1.35e-09
LOC411290	360.955	2.87559	0.308773	9.31296	1.24e-20	7.25e-18
LOC411577	1051.73	2.60827	0.273242	9.54565	1.35e-21	1.03e-18
LOC411599	1374.68	2.93159	0.45388	6.45896	1.05e-10	3.36e-09
LOC411894	119.209	2.88743	0.470923	6.13142	8.71e-10	1.96e-08
LOC412813	8.25927	2.17942	0.501143	4.3489	1.37e-05	7.38e-05
LOC412890	183.511	2.04487	0.234718	8.71202	2.99e-18	9.54e-16
LOC412960	96.3414	2.97529	0.48469	6.13854	8.33e-10	1.89e-08
LOC413040	54.5425	2.35312	0.449348	5.23674	1.63e-07	1.63e-06
LOC413076	41.0559	2.21631	0.800266	2.76947	0.00561477	0.0136996
LOC413128	292.257	2.09655	0.343362	6.10595	1.02e-09	2.24e-08
LOC413357	163.418	2.14882	0.338595	6.34629	2.21e-10	6.36e-09
LOC413574	13.8315	3.06676	0.467107	6.56544	5.19e-11	1.82e-09
LOC413908	3.84366	5.71215	1.08919	5.24439	1.57e-07	1.58e-06
LOC551776	1.11284	2.76558	1.09085	2.53524	0.011237	0.0249064
LOC552096	2.93262	2.83202	0.740619	3.82385	0.000131383	0.00053067
LOC552187	9.5564	2.3032	0.427857	5.3831	7.32e-08	8.3e-07
LOC552311	119.85	2.37481	0.366162	6.48568	8.83e-11	2.88e-09
LOC552761	38.1066	3.67021	0.456475	8.04031	8.96e-16	1.41e-13
LOC724293	727.399	2.12677	0.33529	6.34308	2.25e-10	6.42e-09
LOC724313	0.840301	3.35527	1.18057	2.84208	0.00448201	0.0112756
LOC724367	1676.94	2.16358	0.422534	5.12049	3.05e-07	2.77e-06
LOC724379	83.3443	2.80534	0.278262	10.0816	6.66e-24	8.25e-21
LOC724395	1.5279	3.54647	0.948072	3.74072	0.000183494	0.000706327
LOC724420	39.8128	2.02077	0.347248	5.81938	5.91e-09	9.73e-08
LOC724462	3.65343	2.00542	0.657265	3.05116	0.00227958	0.00633451
LOC724473	15.5971	2.22378	0.393552	5.65054	1.6e-08	2.28e-07
LOC724521	6.03414	4.7553	0.773466	6.14804	7.84e-10	1.81e-08
LOC724548	619.911	2.04227	0.335388	6.08927	1.13e-09	2.41e-08
LOC724664	4.17951	3.18784	0.790678	4.03178	5.54e-05	0.000249972
LOC724803	8.07628	3.47445	0.647913	5.36253	8.21e-08	9.16e-07
LOC724869	32.9413	2.00779	0.34195	5.87159	4.32e-09	7.47e-08
LOC724890	206.121	2.40771	0.252858	9.52198	1.7e-21	1.2e-18
LOC725007	1.19859	3.41983	1.23385	2.77167	0.00557692	0.0136187
LOC725269	198.16	2.24166	0.301797	7.42772	1.1e-13	9.78e-12
LOC725273	168.962	2.83558	0.389643	7.2774	3.4e-13	2.58e-11
LOC725283	31.1477	2.1991	0.427832	5.14009	2.75e-07	2.54e-06
LOC725308	43.6522	2.45138	0.381161	6.43135	1.26e-10	3.94e-09
LOC725344	46.8371	2.46559	0.361988	6.81125	9.68e-12	4.36e-10
LOC725408	10.8846	3.59214	0.51808	6.93357	4.1e-12	2.15e-10
LOC725450	1.79899	4.10985	1.00964	4.0706	4.69e-05	0.000217499
LOC725629	31.1441	4.03646	0.839576	4.80773	1.53e-06	1.12e-05
LOC725668	11.7709	2.04096	0.721285	2.82962	0.0046603	0.0116472
LOC725754	229.597	2.44077	0.406743	6.00076	1.96e-09	3.89e-08
LOC725800	10.5389	2.17552	0.524072	4.15118	3.31e-05	0.000160556
LOC726094	0.95105	2.65285	1.13974	2.32759	0.019934	0.0411122
LOC726251	40.8016	2.13796	0.377707	5.66036	1.51e-08	2.17e-07
LOC726542	79.0666	2.0268	0.339398	5.97175	2.35e-09	4.48e-08
LOC726725	8.47971	2.45409	0.4014	6.11383	9.73e-10	2.15e-08
LOC726762	3.36457	2.1688	0.619241	3.50235	0.000461182	0.00157574
LOC726766	617.03	2.00078	0.205612	9.73086	2.23e-22	2.21e-19
LOC726950	22.6479	4.74557	0.80571	5.88992	3.86e-09	6.81e-08
LOC727052	2.36358	5.46742	1.13261	4.8273	1.38e-06	1.03e-05
LOC727431	5.10717	2.36006	0.536814	4.39643	1.1e-05	6.09e-05
LOC727447	233.276	2.07875	0.320601	6.48393	8.94e-11	2.9e-09
LOC727546	110.921	3.56655	0.604575	5.89927	3.65e-09	6.5e-08
nAChRb2	140.426	2.65284	0.441987	6.00207	1.95e-09	3.88e-08
Obp9	104.93	4.25977	0.567643	7.5043	6.18e-14	5.94e-12
Or12	2.61893	2.33947	0.789416	2.96354	0.00304123	0.00812088
SP34	0.923392	3.83309	1.37817	2.78128	0.00541451	0.0132646
TyHyd	281.31	2.0411	0.396987	5.14148	2.73e-07	2.53e-06
Y-e3	117.197	2.85539	0.465166	6.13843	8.33e-10	1.89e-08

[truncated: 1 more sheets: VI+FPF vs Ctrl-down]
