# Supplementary material for: Transcriptomic Responses Underlying the High Virulence of Black Queen Cell Virus and Sacbrood Virus following a Change in Their Mode of Transmission in Honey Bees (Apis mellifera)
Source: Viruses. 2023 May 30;15(6):1284. doi: 10.3390/v15061284 (PMC10303220; doi:10.3390/v15061284)
Supplement: Supplementary file 1 [file viruses-15-01284-s001.zip › S2_file_functional enrichment_RJP.xlsx]

## Sheet: Tab summary
File S2. Functional enrichment of genes differentially expressed in different treatments
Functional enrichment of GO terms was performed using g: Profiler on the level "biological process" and biological (KEGG) pathways
tab name	description
VF vs Ctrl_up	genes up-regulated in bees inoculated BQCV/SBV by feeding vs control
VF vs Ctrl_down	genes down-regulated in bees inoculated BQCV/SBV by feeding vs control
VI vs Ctrl_up	genes up-regulated in bees inoculated BQCV/SBV by injection vs control
VI vs Ctrl_down	genes down-regulated in bees inoculated BQCV/SBV by feeding vs control
VF+FPF vs Ctrl_up	genes up-regulated in bees inoculated BQCV/SBV by feeding and exposed to FPF vs control
VF+FPF vs Ctrl_down	genes down-regulated in bees inoculated BQCV/SBV by feeding and exposed to FPF vs control
VI+FPF vs Ctrl_up	genes up-regulated in bees inoculated BQCV/SBV by injection and exposed to FPF vs control
VI+FPF vs Ctrl_down	genes down-regulated in bees inoculated BQCV/SBV by injection and exposed to FPF vs control
adjusted p-value of 0.05 or less (Benjamini-Hochberg FDR method)
Term size	Total number of genes in this biological process
query size	number of diffedifferentially expressed genes queried for functional enrichment
interaction size	number of differentially expressed genes in this biological process identified by g: Profiler with a p < 0.05 cutoff.
intersections	names of differentially expressed genes in this biological process

## Sheet: VF vs Ctrl-up
source	term_name	term_id	adjusted_p_value	negative_log10_of_adjusted_p_value	term_size	query_size	intersection_size	effective_domain_size	intersections
GO:BP	hexose catabolic process	GO:0019320	0.032405	1.48939	3	6	1	12398	LOC113218760
GO:BP	galactose catabolic process	GO:0019388	0.032405	1.48939	3	6	1	12398	LOC113218760
GO:BP	galactose catabolic process via UDP-galactose	GO:0033499	0.032405	1.48939	3	6	1	12398	LOC113218760
GO:BP	monosaccharide catabolic process	GO:0046365	0.032405	1.48939	4	6	1	12398	LOC113218760

## Sheet: VF vs Ctrl-down
source	term_name	term_id	adjusted_p_value	negative_log10_of_adjusted_p_value	term_size	query_size	intersection_size	effective_domain_size	intersections
GO:BP	protein polyglutamylation	GO:0018095	0.0101605	1.99309	5	2	1	12398	LOC102654331
GO:BP	peptidyl-glutamic acid modification	GO:0018200	0.0101605	1.99309	7	2	1	12398	LOC102654331

## Sheet: VF+FPF vs Ctrl-up
source	term_name	term_id	adjusted_p_value	negative_log10_of_adjusted_p_value	term_size	query_size	intersection_size	effective_domain_size	intersections
GO:BP	defense response to bacterium	GO:0042742	5.61569e-07	6.2506	9	4	3	4354	APID1,LOC406142,MRJP1
GO:BP	response to bacterium	GO:0009617	5.61569e-07	6.2506	9	4	3	4354	APID1,LOC406142,MRJP1
GO:BP	defense response to other organism	GO:0098542	1.51325e-06	5.82009	17	4	3	4354	APID1,LOC406142,MRJP1
GO:BP	response to external biotic stimulus	GO:0043207	1.51325e-06	5.82009	17	4	3	4354	APID1,LOC406142,MRJP1
GO:BP	response to other organism	GO:0051707	1.51325e-06	5.82009	17	4	3	4354	APID1,LOC406142,MRJP1
GO:BP	response to biotic stimulus	GO:0009607	1.51325e-06	5.82009	17	4	3	4354	APID1,LOC406142,MRJP1
GO:BP	defense response	GO:0006952	1.55622e-06	5.80793	18	4	3	4354	APID1,LOC406142,MRJP1
GO:BP	biological process involved in interspecies interaction between organisms	GO:0044419	1.90171e-06	5.72086	20	4	3	4354	APID1,LOC406142,MRJP1
GO:BP	response to external stimulus	GO:0009605	1.24701e-05	4.90413	38	4	3	4354	APID1,LOC406142,MRJP1
GO:BP	innate immune response	GO:0045087	0.000264062	3.57829	14	4	2	4354	APID1,LOC406142
GO:BP	immune response	GO:0006955	0.000450402	3.3464	19	4	2	4354	APID1,LOC406142
GO:BP	immune system process	GO:0002376	0.000506721	3.29523	21	4	2	4354	APID1,LOC406142
GO:BP	response to stress	GO:0006950	0.000776446	3.10989	168	4	3	4354	APID1,LOC406142,MRJP1
GO:BP	defense response to Gram-negative bacterium	GO:0050829	0.00222421	2.65282	1	4	1	4354	MRJP1
GO:BP	polyphenic determination, influence by environmental factors	GO:0048651	0.00222421	2.65282	1	4	1	4354	MRJP1
GO:BP	caste determination, influence by environmental factors	GO:0048650	0.00222421	2.65282	1	4	1	4354	MRJP1
GO:BP	caste determination	GO:0048648	0.00222421	2.65282	1	4	1	4354	MRJP1
GO:BP	polyphenic determination	GO:0048647	0.00222421	2.65282	1	4	1	4354	MRJP1
GO:BP	defense response to Gram-positive bacterium	GO:0050830	0.00222421	2.65282	1	4	1	4354	MRJP1
GO:BP	defense response to fungus	GO:0050832	0.00402337	2.39541	2	4	1	4354	MRJP1
GO:BP	response to fungus	GO:0009620	0.00402337	2.39541	2	4	1	4354	MRJP1
GO:BP	cell killing	GO:0001906	0.00487279	2.31222	3	4	1	4354	MRJP1
GO:BP	killing of cells of another organism	GO:0031640	0.00487279	2.31222	3	4	1	4354	MRJP1
GO:BP	galactose catabolic process	GO:0019388	0.00487279	2.31222	3	4	1	4354	LOC113218760
GO:BP	hexose catabolic process	GO:0019320	0.00487279	2.31222	3	4	1	4354	LOC113218760
GO:BP	galactose catabolic process via UDP-galactose	GO:0033499	0.00487279	2.31222	3	4	1	4354	LOC113218760
GO:BP	monosaccharide catabolic process	GO:0046365	0.00625427	2.20382	4	4	1	4354	LOC113218760
GO:BP	galactose metabolic process	GO:0006012	0.0120452	1.91919	8	4	1	4354	LOC113218760
GO:BP	response to stimulus	GO:0050896	0.0225514	1.64683	694	4	3	4354	APID1,LOC406142,MRJP1
GO:BP	carbohydrate catabolic process	GO:0016052	0.0307671	1.51191	22	4	1	4354	LOC113218760
GO:BP	hexose metabolic process	GO:0019318	0.0337998	1.47109	25	4	1	4354	LOC113218760
GO:BP	monosaccharide metabolic process	GO:0005996	0.0366348	1.43611	28	4	1	4354	LOC113218760
GO:BP	small molecule catabolic process	GO:0044282	0.048046	1.31834	38	4	1	4354	LOC113218760

## Sheet: VF+FPF vs Ctrl-down
source	term_name	term_id	adjusted_p_value	negative_log10_of_adjusted_p_value	term_size	query_size	intersection_size	effective_domain_size	intersections
KEGG	Lysine degradation	KEGG:00310	0.0104602	1.98046	13	6	1	12398	LOC724239
KEGG	Tryptophan metabolism	KEGG:00380	0.0104602	1.98046	11	6	1	12398	LOC724239
KEGG	2-Oxocarboxylic acid metabolism	KEGG:01210	0.0104602	1.98046	11	6	1	12398	LOC724239

## Sheet: VI vs Ctrl-up
source	term_name	term_id	adjusted_p_value	negative_log10_of_adjusted_p_value	term_size	query_size	intersection_size	effective_domain_size	intersections
GO:BP	response to bacterium	GO:0009617	0.000668923	3.17462	9	22	3	4354	APID1,LOC406142,LOC406144
GO:BP	defense response to bacterium	GO:0042742	0.000668923	3.17462	9	22	3	4354	APID1,LOC406142,LOC406144
GO:BP	response to other organism	GO:0051707	0.00150711	2.82186	17	22	3	4354	APID1,LOC406142,LOC406144
GO:BP	innate immune response	GO:0045087	0.00150711	2.82186	14	22	3	4354	APID1,LOC406142,LOC406144
GO:BP	response to biotic stimulus	GO:0009607	0.00150711	2.82186	17	22	3	4354	APID1,LOC406142,LOC406144
GO:BP	defense response to other organism	GO:0098542	0.00150711	2.82186	17	22	3	4354	APID1,LOC406142,LOC406144
GO:BP	response to external biotic stimulus	GO:0043207	0.00150711	2.82186	17	22	3	4354	APID1,LOC406142,LOC406144
GO:BP	defense response	GO:0006952	0.00157728	2.80209	18	22	3	4354	APID1,LOC406142,LOC406144
GO:BP	immune response	GO:0006955	0.00165946	2.78003	19	22	3	4354	APID1,LOC406142,LOC406144
GO:BP	biological process involved in interspecies interaction between organisms	GO:0044419	0.00175132	2.75663	20	22	3	4354	APID1,LOC406142,LOC406144
GO:BP	immune system process	GO:0002376	0.00185138	2.7325	21	22	3	4354	APID1,LOC406142,LOC406144
GO:BP	response to external stimulus	GO:0009605	0.0101812	1.9922	38	22	3	4354	APID1,LOC406142,LOC406144
GO:BP	hemostasis	GO:0007599	0.0430976	1.36555	1	22	1	4354	LOC406144
GO:BP	coagulation	GO:0050817	0.0430976	1.36555	1	22	1	4354	LOC406144
GO:BP	humoral immune response	GO:0006959	0.0430976	1.36555	1	22	1	4354	LOC406144
GO:BP	hemolymph coagulation	GO:0042381	0.0430976	1.36555	1	22	1	4354	LOC406144
GO:BP	wound healing	GO:0042060	0.0430976	1.36555	1	22	1	4354	LOC406144
KEGG	Toll and Imd signaling pathway	KEGG:04624	0.0392982	1.40563	28	1	1	1425	LOC100578156

## Sheet: VI vs Ctrl-down
source	term_name	term_id	adjusted_p_value	negative_log10_of_adjusted_p_value	term_size	query_size	intersection_size	effective_domain_size	intersections
GO:BP	modulation of process of another organism	GO:0035821	6.5796e-07	6.1818	5	23	4	4354	APAMIN,LOC406145,MCDP,MELT
GO:BP	negative regulation of molecular function	GO:0044092	2.12613e-05	4.67241	11	23	4	4354	APAMIN,LOC406145,LOC678674,MELT
GO:BP	biological process involved in interspecies interaction between organisms	GO:0044419	0.000201647	3.69541	20	23	4	4354	APAMIN,LOC406145,MCDP,MELT
GO:BP	negative regulation of catalytic activity	GO:0043086	0.000590922	3.22847	9	23	3	4354	LOC406145,LOC678674,MELT
GO:BP	cell killing	GO:0001906	0.00232507	2.63356	3	23	2	4354	LOC406145,MELT
GO:BP	killing of cells of another organism	GO:0031640	0.00232507	2.63356	3	23	2	4354	LOC406145,MELT
GO:BP	lipid localization	GO:0010876	0.00232507	2.63356	46	23	4	4354	LOC409187,LOC724436,PLA2,VG
GO:BP	lipid transport	GO:0006869	0.00232507	2.63356	43	23	4	4354	LOC409187,LOC724436,PLA2,VG
GO:BP	negative regulation of proteolysis	GO:0045861	0.00536029	2.27081	5	23	2	4354	LOC406145,LOC678674
GO:BP	negative regulation of endopeptidase activity	GO:0010951	0.00536029	2.27081	5	23	2	4354	LOC406145,LOC678674
GO:BP	negative regulation of peptidase activity	GO:0010466	0.00536029	2.27081	5	23	2	4354	LOC406145,LOC678674
GO:BP	regulation of endopeptidase activity	GO:0052548	0.00559218	2.25242	6	23	2	4354	LOC406145,LOC678674
GO:BP	lipid metabolic process	GO:0006629	0.00559218	2.25242	198	23	6	4354	LOC100576797,LOC551910,LOC724226,LOC724436,LOC727618,PLA2
GO:BP	regulation of peptidase activity	GO:0052547	0.00559218	2.25242	7	23	2	4354	LOC406145,LOC678674
GO:BP	arachidonate transport	GO:1903963	0.00559218	2.25242	7	23	2	4354	LOC724436,PLA2
GO:BP	negative regulation of hydrolase activity	GO:0051346	0.00559218	2.25242	6	23	2	4354	LOC406145,LOC678674
GO:BP	icosanoid transport	GO:0071715	0.00559218	2.25242	7	23	2	4354	LOC724436,PLA2
GO:BP	icosanoid secretion	GO:0032309	0.00559218	2.25242	7	23	2	4354	LOC724436,PLA2
GO:BP	arachidonic acid secretion	GO:0050482	0.00559218	2.25242	7	23	2	4354	LOC724436,PLA2
GO:BP	long-chain fatty acid transport	GO:0015909	0.00559218	2.25242	7	23	2	4354	LOC724436,PLA2
GO:BP	fatty acid transport	GO:0015908	0.00559218	2.25242	7	23	2	4354	LOC724436,PLA2
GO:BP	regulation of molecular function	GO:0065009	0.00559218	2.25242	66	23	4	4354	APAMIN,LOC406145,LOC678674,MELT
GO:BP	regulation of proteolysis	GO:0030162	0.00894923	2.04821	9	23	2	4354	LOC406145,LOC678674
GO:BP	secretion	GO:0046903	0.00894923	2.04821	38	23	3	4354	LOC724436,MCDP,PLA2
GO:BP	monocarboxylic acid transport	GO:0015718	0.010444	1.98113	10	23	2	4354	LOC724436,PLA2
GO:BP	carboxylic acid transport	GO:0046942	0.0122345	1.91241	11	23	2	4354	LOC724436,PLA2
GO:BP	organic acid transport	GO:0015849	0.0140922	1.85102	12	23	2	4354	LOC724436,PLA2
GO:BP	negative regulation of potassium ion transmembrane transporter activity	GO:1901017	0.0178484	1.7484	1	23	1	4354	APAMIN
GO:BP	mast cell degranulation	GO:0043303	0.0178484	1.7484	1	23	1	4354	MCDP
GO:BP	regulation of catalytic activity	GO:0050790	0.0178484	1.7484	51	23	3	4354	LOC406145,LOC678674,MELT
GO:BP	negative regulation of transport	GO:0051051	0.0178484	1.7484	1	23	1	4354	APAMIN
GO:BP	regulation of inward rectifier potassium channel activity	GO:1901979	0.0178484	1.7484	1	23	1	4354	APAMIN
GO:BP	negative regulation of protein metabolic process	GO:0051248	0.0178484	1.7484	18	23	2	4354	LOC406145,LOC678674
GO:BP	negative regulation of inward rectifier potassium channel activity	GO:1903609	0.0178484	1.7484	1	23	1	4354	APAMIN
GO:BP	mast cell activation	GO:0045576	0.0178484	1.7484	1	23	1	4354	MCDP
GO:BP	leukocyte activation	GO:0045321	0.0178484	1.7484	1	23	1	4354	MCDP
GO:BP	envenomation resulting in modulation of sensory perception of pain in another organism	GO:0044742	0.0178484	1.7484	1	23	1	4354	LOC406145
GO:BP	negative regulation of voltage-gated potassium channel activity	GO:1903817	0.0178484	1.7484	1	23	1	4354	APAMIN
GO:BP	hemolysis in another organism	GO:0044179	0.0178484	1.7484	1	23	1	4354	MELT
GO:BP	cytolysis in another organism	GO:0051715	0.0178484	1.7484	1	23	1	4354	MELT
GO:BP	negative regulation of cation transmembrane transport	GO:1904063	0.0178484	1.7484	1	23	1	4354	APAMIN
GO:BP	negative regulation of potassium ion transmembrane transport	GO:1901380	0.0178484	1.7484	1	23	1	4354	APAMIN
GO:BP	leukocyte degranulation	GO:0043299	0.0178484	1.7484	1	23	1	4354	MCDP
GO:BP	cell activation	GO:0001775	0.0178484	1.7484	1	23	1	4354	MCDP
GO:BP	negative regulation of potassium ion transport	GO:0043267	0.0178484	1.7484	1	23	1	4354	APAMIN
GO:BP	immune effector process	GO:0002252	0.0178484	1.7484	1	23	1	4354	MCDP
GO:BP	cell activation involved in immune response	GO:0002263	0.0178484	1.7484	1	23	1	4354	MCDP
GO:BP	myeloid leukocyte activation	GO:0002274	0.0178484	1.7484	1	23	1	4354	MCDP
GO:BP	myeloid cell activation involved in immune response	GO:0002275	0.0178484	1.7484	1	23	1	4354	MCDP
GO:BP	mast cell activation involved in immune response	GO:0002279	0.0178484	1.7484	1	23	1	4354	MCDP
GO:BP	leukocyte activation involved in immune response	GO:0002366	0.0178484	1.7484	1	23	1	4354	MCDP
GO:BP	immune system process	GO:0002376	0.0178484	1.7484	21	23	2	4354	LOC406145,MCDP
GO:BP	leukocyte mediated immunity	GO:0002443	0.0178484	1.7484	1	23	1	4354	MCDP
GO:BP	myeloid leukocyte mediated immunity	GO:0002444	0.0178484	1.7484	1	23	1	4354	MCDP
GO:BP	mast cell mediated immunity	GO:0002448	0.0178484	1.7484	1	23	1	4354	MCDP
GO:BP	isoprenoid metabolic process	GO:0006720	0.0178484	1.7484	16	23	2	4354	LOC551910,LOC727618
GO:BP	immune response	GO:0006955	0.0178484	1.7484	19	23	2	4354	LOC406145,MCDP
GO:BP	negative regulation of ion transport	GO:0043271	0.0178484	1.7484	1	23	1	4354	APAMIN
GO:BP	negative regulation of cation channel activity	GO:2001258	0.0178484	1.7484	1	23	1	4354	APAMIN
GO:BP	envenomation resulting in modulation of process in another organism	GO:0035738	0.0178484	1.7484	1	23	1	4354	LOC406145
GO:BP	organic anion transport	GO:0015711	0.0178484	1.7484	16	23	2	4354	LOC724436,PLA2
GO:BP	isoprenoid biosynthetic process	GO:0008299	0.0178484	1.7484	16	23	2	4354	LOC551910,LOC727618
GO:BP	negative regulation of transporter activity	GO:0032410	0.0178484	1.7484	1	23	1	4354	APAMIN
GO:BP	negative regulation of ion transmembrane transporter activity	GO:0032413	0.0178484	1.7484	1	23	1	4354	APAMIN
GO:BP	negative regulation of transmembrane transport	GO:0034763	0.0178484	1.7484	1	23	1	4354	APAMIN
GO:BP	negative regulation of ion transmembrane transport	GO:0034766	0.0178484	1.7484	1	23	1	4354	APAMIN
GO:BP	cellular lipid metabolic process	GO:0044255	0.0192272	1.71608	141	23	4	4354	LOC551910,LOC724436,LOC727618,PLA2
GO:BP	ion transport	GO:0006811	0.0229389	1.63943	238	23	5	4354	AMEL_8916,APAMIN,LOC724436,MELT,PLA2
GO:BP	cytolysis	GO:0019835	0.0321923	1.49225	2	23	1	4354	MELT
GO:BP	vacuolar localization	GO:1990849	0.0321923	1.49225	2	23	1	4354	MCDP
GO:BP	defense response to fungus	GO:0050832	0.0321923	1.49225	2	23	1	4354	LOC406145
GO:BP	response to fungus	GO:0009620	0.0321923	1.49225	2	23	1	4354	LOC406145
GO:BP	lysosome localization	GO:0032418	0.0321923	1.49225	2	23	1	4354	MCDP
GO:BP	regulation of hydrolase activity	GO:0051336	0.0362403	1.44081	32	23	2	4354	LOC406145,LOC678674
GO:BP	transport	GO:0006810	0.0382804	1.41702	774	23	9	4354	AMEL_8916,APAMIN,LOC102655153,LOC409187,LOC724436,MCDP,MELT,PLA2,VG
GO:BP	establishment of localization	GO:0051234	0.0393809	1.40471	779	23	9	4354	AMEL_8916,APAMIN,LOC102655153,LOC409187,LOC724436,MCDP,MELT,PLA2,VG
GO:BP	localization	GO:0051179	0.0431155	1.36537	793	23	9	4354	AMEL_8916,APAMIN,LOC102655153,LOC409187,LOC724436,MCDP,MELT,PLA2,VG
GO:BP	negative regulation of nitrogen compound metabolic process	GO:0051172	0.0431155	1.36537	36	23	2	4354	LOC406145,LOC678674
GO:BP	response to external stimulus	GO:0009605	0.0471998	1.32606	38	23	2	4354	LOC406145,LOP1

## Sheet: VI+FPF vs Ctrl-up
source	term_name	term_id	adjusted_p_value	negative_log10_of_adjusted_p_value	term_size	query_size	intersection_size	effective_domain_size	intersections
GO:BP	immune system process	GO:0002376	0.0126505	1.89789	21	62	4	4354	APID1,LOC100577242,LOC406142,LOC406144
GO:BP	immune response	GO:0006955	0.0126505	1.89789	19	62	4	4354	APID1,LOC100577242,LOC406142,LOC406144
GO:BP	response to wounding	GO:0009611	0.0126505	1.89789	2	62	2	4354	LOC100577242,LOC406144
GO:BP	response to bacterium	GO:0009617	0.0126505	1.89789	9	62	3	4354	APID1,LOC406142,LOC406144
GO:BP	defense response to bacterium	GO:0042742	0.0126505	1.89789	9	62	3	4354	APID1,LOC406142,LOC406144
GO:BP	defense response to other organism	GO:0098542	0.0363095	1.43998	17	62	3	4354	APID1,LOC406142,LOC406144
GO:BP	signal transduction	GO:0007165	0.0363095	1.43998	510	62	16	4354	5-HT7,LOC100577242,LOC100577719,LOC100578939,LOC107964335,LOC408438,LOC409159,LOC410235,LOC410514,LOC410654,LOC411290,LOC413040,LOC552761,LOC724473,LOC724548,OR12
GO:BP	G protein-coupled receptor signaling pathway	GO:0007186	0.0363095	1.43998	119	62	7	4354	5-HT7,LOC107964335,LOC409159,LOC410654,LOC413040,LOC552761,LOC724473
GO:BP	response to biotic stimulus	GO:0009607	0.0363095	1.43998	17	62	3	4354	APID1,LOC406142,LOC406144
GO:BP	response to external biotic stimulus	GO:0043207	0.0363095	1.43998	17	62	3	4354	APID1,LOC406142,LOC406144
GO:BP	response to other organism	GO:0051707	0.0363095	1.43998	17	62	3	4354	APID1,LOC406142,LOC406144
GO:BP	innate immune response	GO:0045087	0.0363095	1.43998	14	62	3	4354	APID1,LOC406142,LOC406144
GO:BP	response to stimulus	GO:0050896	0.0363095	1.43998	694	62	20	4354	5-HT7,APID1,LOC100577242,LOC100577719,LOC100578939,LOC107964335,LOC406142,LOC406144,LOC408438,LOC409159,LOC410235,LOC410514,LOC410654,LOC411290,LOC413040,LOC552761,LOC724473,LOC724548,LOC727431,OR12
GO:BP	defense response	GO:0006952	0.0391341	1.40744	18	62	3	4354	APID1,LOC406142,LOC406144
GO:BP	biological regulation	GO:0065007	0.0391341	1.40744	1136	62	27	4354	5-HT7,LOC100576194,LOC100577242,LOC100577719,LOC100578939,LOC107964335,LOC406144,LOC408306,LOC408438,LOC409159,LOC410235,LOC410514,LOC410654,LOC410904,LOC411290,LOC411577,LOC413040,LOC413076,LOC413574,LOC552311,LOC552761,LOC724420,LOC724473,LOC724548,LOC725629,LOC725754,OR12
GO:BP	cellular response to nitrogen compound	GO:1901699	0.0441833	1.35474	6	62	2	4354	5-HT7,LOC408438
GO:BP	cell communication	GO:0007154	0.0441833	1.35474	537	62	16	4354	5-HT7,LOC100577242,LOC100577719,LOC100578939,LOC107964335,LOC408438,LOC409159,LOC410235,LOC410514,LOC410654,LOC411290,LOC413040,LOC552761,LOC724473,LOC724548,OR12
GO:BP	biological process involved in interspecies interaction between organisms	GO:0044419	0.0441833	1.35474	20	62	3	4354	APID1,LOC406142,LOC406144
GO:BP	signaling	GO:0023052	0.0441833	1.35474	538	62	16	4354	5-HT7,LOC100577242,LOC100577719,LOC100578939,LOC107964335,LOC408438,LOC409159,LOC410235,LOC410514,LOC410654,LOC411290,LOC413040,LOC552761,LOC724473,LOC724548,OR12
KEGG	Tyrosine metabolism	KEGG:00350	0.0416819	1.38005	11	9	2	1425	LOC410638,TYHYD

## Sheet: VI+FPF vs Ctrl-down
source	term_name	term_id	adjusted_p_value	negative_log10_of_adjusted_p_value	term_size	query_size	intersection_size	effective_domain_size	intersections
GO:BP	modulation of process of another organism	GO:0035821	7.79963e-06	5.10793	5	38	4	4354	APAMIN,LOC406145,MCDP,MELT
GO:BP	negative regulation of molecular function	GO:0044092	0.000247883	3.60575	11	38	4	4354	APAMIN,LOC406145,LOC678674,MELT
GO:BP	biological process involved in interspecies interaction between organisms	GO:0044419	0.00229318	2.63956	20	38	4	4354	APAMIN,LOC406145,MCDP,MELT
GO:BP	negative regulation of catalytic activity	GO:0043086	0.00395192	2.40319	9	38	3	4354	LOC406145,LOC678674,MELT
GO:BP	inorganic ion transmembrane transport	GO:0098660	0.00680344	2.16727	90	38	6	4354	APAMIN,COX3,LOC102654905,LOC409631,LOC551604,LOC551680
GO:BP	ion transport	GO:0006811	0.0080112	2.0963	238	38	9	4354	APAMIN,COX3,LOC102654905,LOC409631,LOC551604,LOC551680,LOC724436,MELT,PLA2
GO:BP	regulation of molecular function	GO:0065009	0.00827321	2.08233	66	38	5	4354	APAMIN,LOC102654905,LOC406145,LOC678674,MELT
GO:BP	cell killing	GO:0001906	0.00827321	2.08233	3	38	2	4354	LOC406145,MELT
GO:BP	killing of cells of another organism	GO:0031640	0.00827321	2.08233	3	38	2	4354	LOC406145,MELT
GO:BP	inorganic cation transmembrane transport	GO:0098662	0.0133005	1.87613	78	38	5	4354	APAMIN,COX3,LOC102654905,LOC409631,LOC551604
GO:BP	cation transmembrane transport	GO:0098655	0.0133005	1.87613	79	38	5	4354	APAMIN,COX3,LOC102654905,LOC409631,LOC551604
GO:BP	lipid transport	GO:0006869	0.0133005	1.87613	43	38	4	4354	LOC409187,LOC724436,PLA2,VG
GO:BP	ion transmembrane transport	GO:0034220	0.0133005	1.87613	116	38	6	4354	APAMIN,COX3,LOC102654905,LOC409631,LOC551604,LOC551680
GO:BP	lipid localization	GO:0010876	0.0136485	1.86491	46	38	4	4354	LOC409187,LOC724436,PLA2,VG
GO:BP	negative regulation of peptidase activity	GO:0010466	0.0136485	1.86491	5	38	2	4354	LOC406145,LOC678674
GO:BP	negative regulation of proteolysis	GO:0045861	0.0136485	1.86491	5	38	2	4354	LOC406145,LOC678674
GO:BP	negative regulation of endopeptidase activity	GO:0010951	0.0136485	1.86491	5	38	2	4354	LOC406145,LOC678674
GO:BP	regulation of endopeptidase activity	GO:0052548	0.0182169	1.73953	6	38	2	4354	LOC406145,LOC678674
GO:BP	negative regulation of hydrolase activity	GO:0051346	0.0182169	1.73953	6	38	2	4354	LOC406145,LOC678674
GO:BP	icosanoid transport	GO:0071715	0.0185347	1.73201	7	38	2	4354	LOC724436,PLA2
GO:BP	long-chain fatty acid transport	GO:0015909	0.0185347	1.73201	7	38	2	4354	LOC724436,PLA2
GO:BP	fatty acid transport	GO:0015908	0.0185347	1.73201	7	38	2	4354	LOC724436,PLA2
GO:BP	arachidonate transport	GO:1903963	0.0185347	1.73201	7	38	2	4354	LOC724436,PLA2
GO:BP	arachidonic acid secretion	GO:0050482	0.0185347	1.73201	7	38	2	4354	LOC724436,PLA2
GO:BP	regulation of peptidase activity	GO:0052547	0.0185347	1.73201	7	38	2	4354	LOC406145,LOC678674
GO:BP	icosanoid secretion	GO:0032309	0.0185347	1.73201	7	38	2	4354	LOC724436,PLA2
GO:BP	regulation of proteolysis	GO:0030162	0.0302614	1.51911	9	38	2	4354	LOC406145,LOC678674
GO:BP	monocarboxylic acid transport	GO:0015718	0.0330402	1.48096	10	38	2	4354	LOC724436,PLA2
GO:BP	carboxylic acid transport	GO:0046942	0.0330402	1.48096	11	38	2	4354	LOC724436,PLA2
GO:BP	mast cell mediated immunity	GO:0002448	0.0330402	1.48096	1	38	1	4354	MCDP
GO:BP	negative regulation of transport	GO:0051051	0.0330402	1.48096	1	38	1	4354	APAMIN
GO:BP	localization	GO:0051179	0.0330402	1.48096	793	38	14	4354	APAMIN,COX3,LOC102654905,LOC409187,LOC409631,LOC410296,LOC551604,LOC551680,LOC724436,LOC725922,MCDP,MELT,PLA2,VG
GO:BP	establishment of localization	GO:0051234	0.0330402	1.48096	779	38	14	4354	APAMIN,COX3,LOC102654905,LOC409187,LOC409631,LOC410296,LOC551604,LOC551680,LOC724436,LOC725922,MCDP,MELT,PLA2,VG
GO:BP	myeloid leukocyte mediated immunity	GO:0002444	0.0330402	1.48096	1	38	1	4354	MCDP
GO:BP	cytolysis in another organism	GO:0051715	0.0330402	1.48096	1	38	1	4354	MELT
GO:BP	leukocyte mediated immunity	GO:0002443	0.0330402	1.48096	1	38	1	4354	MCDP
GO:BP	transmembrane transport	GO:0055085	0.0330402	1.48096	380	38	9	4354	APAMIN,COX3,LOC102654905,LOC409631,LOC410296,LOC551604,LOC551680,LOC725922,MELT
GO:BP	leukocyte activation involved in immune response	GO:0002366	0.0330402	1.48096	1	38	1	4354	MCDP
GO:BP	mast cell activation involved in immune response	GO:0002279	0.0330402	1.48096	1	38	1	4354	MCDP
GO:BP	myeloid cell activation involved in immune response	GO:0002275	0.0330402	1.48096	1	38	1	4354	MCDP
GO:BP	myeloid leukocyte activation	GO:0002274	0.0330402	1.48096	1	38	1	4354	MCDP
GO:BP	cell activation involved in immune response	GO:0002263	0.0330402	1.48096	1	38	1	4354	MCDP
GO:BP	regulation of potassium ion transmembrane transporter activity	GO:1901016	0.0330402	1.48096	13	38	2	4354	APAMIN,LOC102654905
GO:BP	negative regulation of potassium ion transmembrane transporter activity	GO:1901017	0.0330402	1.48096	1	38	1	4354	APAMIN
GO:BP	regulation of potassium ion transmembrane transport	GO:1901379	0.0330402	1.48096	13	38	2	4354	APAMIN,LOC102654905
GO:BP	negative regulation of potassium ion transmembrane transport	GO:1901380	0.0330402	1.48096	1	38	1	4354	APAMIN
GO:BP	regulation of inward rectifier potassium channel activity	GO:1901979	0.0330402	1.48096	1	38	1	4354	APAMIN
GO:BP	negative regulation of inward rectifier potassium channel activity	GO:1903609	0.0330402	1.48096	1	38	1	4354	APAMIN
GO:BP	negative regulation of voltage-gated potassium channel activity	GO:1903817	0.0330402	1.48096	1	38	1	4354	APAMIN
GO:BP	immune effector process	GO:0002252	0.0330402	1.48096	1	38	1	4354	MCDP
GO:BP	regulation of cation transmembrane transport	GO:1904062	0.0330402	1.48096	13	38	2	4354	APAMIN,LOC102654905
GO:BP	negative regulation of cation transmembrane transport	GO:1904063	0.0330402	1.48096	1	38	1	4354	APAMIN
GO:BP	regulation of cation channel activity	GO:2001257	0.0330402	1.48096	13	38	2	4354	APAMIN,LOC102654905
GO:BP	negative regulation of cation channel activity	GO:2001258	0.0330402	1.48096	1	38	1	4354	APAMIN
GO:BP	secretion	GO:0046903	0.0330402	1.48096	38	38	3	4354	LOC724436,MCDP,PLA2
GO:BP	organic anion transport	GO:0015711	0.0330402	1.48096	16	38	2	4354	LOC724436,PLA2
GO:BP	cell activation	GO:0001775	0.0330402	1.48096	1	38	1	4354	MCDP
GO:BP	envenomation resulting in modulation of process in another organism	GO:0035738	0.0330402	1.48096	1	38	1	4354	LOC406145
GO:BP	organic acid transport	GO:0015849	0.0330402	1.48096	12	38	2	4354	LOC724436,PLA2
GO:BP	regulation of transmembrane transporter activity	GO:0022898	0.0330402	1.48096	13	38	2	4354	APAMIN,LOC102654905
GO:BP	deoxyribonucleoside triphosphate metabolic process	GO:0009200	0.0330402	1.48096	1	38	1	4354	LOC726205
GO:BP	cellular amino acid catabolic process	GO:0009063	0.0330402	1.48096	16	38	2	4354	LOC410550,LOC411307
GO:BP	regulation of transporter activity	GO:0032409	0.0330402	1.48096	13	38	2	4354	APAMIN,LOC102654905
GO:BP	negative regulation of transporter activity	GO:0032410	0.0330402	1.48096	1	38	1	4354	APAMIN
GO:BP	regulation of ion transmembrane transporter activity	GO:0032412	0.0330402	1.48096	13	38	2	4354	APAMIN,LOC102654905
GO:BP	negative regulation of ion transmembrane transporter activity	GO:0032413	0.0330402	1.48096	1	38	1	4354	APAMIN
GO:BP	negative regulation of transmembrane transport	GO:0034763	0.0330402	1.48096	1	38	1	4354	APAMIN
GO:BP	negative regulation of ion transmembrane transport	GO:0034766	0.0330402	1.48096	1	38	1	4354	APAMIN
GO:BP	mast cell activation	GO:0045576	0.0330402	1.48096	1	38	1	4354	MCDP
GO:BP	anion transport	GO:0006820	0.0330402	1.48096	45	38	3	4354	LOC551680,LOC724436,PLA2
GO:BP	deoxyribonucleoside triphosphate catabolic process	GO:0009204	0.0330402	1.48096	1	38	1	4354	LOC726205
GO:BP	cation transport	GO:0006812	0.0330402	1.48096	147	38	5	4354	APAMIN,COX3,LOC102654905,LOC409631,LOC551604
GO:BP	negative regulation of potassium ion transport	GO:0043267	0.0330402	1.48096	1	38	1	4354	APAMIN
GO:BP	negative regulation of ion transport	GO:0043271	0.0330402	1.48096	1	38	1	4354	APAMIN
GO:BP	leukocyte degranulation	GO:0043299	0.0330402	1.48096	1	38	1	4354	MCDP
GO:BP	mast cell degranulation	GO:0043303	0.0330402	1.48096	1	38	1	4354	MCDP
GO:BP	transport	GO:0006810	0.0330402	1.48096	774	38	14	4354	APAMIN,COX3,LOC102654905,LOC409187,LOC409631,LOC410296,LOC551604,LOC551680,LOC724436,LOC725922,MCDP,MELT,PLA2,VG
GO:BP	hemolysis in another organism	GO:0044179	0.0330402	1.48096	1	38	1	4354	MELT
GO:BP	cellular lipid metabolic process	GO:0044255	0.0330402	1.48096	141	38	5	4354	LOC551910,LOC724436,LOC724995,LOC725255,PLA2
GO:BP	lipid metabolic process	GO:0006629	0.0330402	1.48096	198	38	6	4354	LOC100576797,LOC551910,LOC724436,LOC724995,LOC725255,PLA2
GO:BP	envenomation resulting in modulation of sensory perception of pain in another organism	GO:0044742	0.0330402	1.48096	1	38	1	4354	LOC406145
GO:BP	leukocyte activation	GO:0045321	0.0330402	1.48096	1	38	1	4354	MCDP
GO:BP	regulation of potassium ion transport	GO:0043266	0.0330402	1.48096	13	38	2	4354	APAMIN,LOC102654905
GO:BP	regulation of metal ion transport	GO:0010959	0.0330402	1.48096	13	38	2	4354	APAMIN,LOC102654905
GO:BP	regulation of catalytic activity	GO:0050790	0.0358149	1.44594	51	38	3	4354	LOC406145,LOC678674,MELT
GO:BP	negative regulation of protein metabolic process	GO:0051248	0.0384286	1.41535	18	38	2	4354	LOC406145,LOC678674
GO:BP	immune response	GO:0006955	0.0422238	1.37444	19	38	2	4354	LOC406145,MCDP
GO:BP	proteolysis	GO:0006508	0.0490343	1.3095	301	38	7	4354	LOC406145,LOC409619,LOC410894,LOC551224,LOC678674,LOC724308,LOC725270
GO:BP	immune system process	GO:0002376	0.0490343	1.3095	21	38	2	4354	LOC406145,MCDP
GO:BP	organic acid catabolic process	GO:0016054	0.0490343	1.3095	21	38	2	4354	LOC410550,LOC411307
GO:BP	carboxylic acid catabolic process	GO:0046395	0.0490343	1.3095	21	38	2	4354	LOC410550,LOC411307
KEGG	Glycosaminoglycan degradation	KEGG:00531	0.0239992	1.6198	8	13	2	1425	LOC551437,LOC552073
KEGG	Metabolic pathways	KEGG:01100	0.0239992	1.6198	486	13	10	1425	LOC406114,LOC410254,LOC410747,LOC551224,LOC551437,LOC552073,LOC552130,LOC552523,LOC726205,PLA2
KEGG	Lysine degradation	KEGG:00310	0.0434344	1.36217	13	13	2	1425	LOC410254,LOC552130
