# Supplementary material for: Transcriptomic Responses Underlying the High Virulence of Black Queen Cell Virus and Sacbrood Virus following a Change in Their Mode of Transmission in Honey Bees (Apis mellifera)
Source: Viruses. 2023 May 30;15(6):1284. doi: 10.3390/v15061284 (PMC10303220; doi:10.3390/v15061284)
Supplement: Supplementary file 1 [file viruses-15-01284-s001.zip › Table S1_primers used.xlsx]

## Sheet: Sheet1
Table S1. Primers used for quantification of viruses by reverse transcription followed by qPCR and efficiency of qPCR.
Viral Target	Primer Name	Sequence 5’-3’	Efficiency	Reference
BQCV	BQCV-qF7893	5′-AGTGGCGGAGATGTATGC-3′	1.033	[1]
	BQCV-qB8150	5′-GGAGGTGAAGTGGCTATATC-3′
CBPV	CBPV1-qF1818	5′-CAACCTGCCTCAACACAG-3′	0.902	[1]
	CBPV1-qB2077	5′-AATCTGGCAAGGTTGACTGG-3′
SBV	SBV-qF3164	5′-TTGGAACTACGCATTCTCTG-3′	0.921	[1]
	SBV-qB3461	5′-GCTCTAACCTCGCATCAAC-3′
KBV	KBV-F6639	5′-CCATACCTGCTGATAACC-3′		[1]
	KIABPV-R6707	5′-CTGAATAATACTGTGCGTATC-3′
IAPV	IAPV-F6627	5′-CCATGCCTGGCGATTCAC-3′		[1]
	KIABPV-R6707	5′-CTGAATAATACTGTGCGTATC-3′
DWV-A	DWV-F8668	5′-TTCATTAAAGCCACCTGGAACATC-3′	0.856	[2]
	DWV-B8757	5′-TTTCCTCATTAACTGTGTCGTTGA-3′
DWV-B	VDVq-F2	5′-TAT CTT CAT TAA AAC CGCCAGGCT 3′	0.86	[2]
	VDVq-R2a	5′-CTT CCT CAT TAA CTG AGT TGT TGTC-3′
ABPV	KIABPV-F6648	5′-CCTTTCATGATGTGGAAAC-3′		[2]
	KIABPV-B6707	5′-CTGAATAATACTGTGCGTATC-3′
SBPV	SBPV-F3177	5′-GCGCTTTAGTTCAATTGCC-3′	0.938	[3]
	SBPV-B3363	5′-ATTATAGGACGTGAAAATATAC-3′
EBV	EBV-F-HS	5′-TACAAGTGCAGGTTTTCCGTT-3′		[4]
	EBV-R-HS	5′-CTCATTAACTGCGTAGTTGAC-3′
β-actin (host reference)	AMActin - F:	5′-ATGCCAACACTGTCCTTTCTGG-3′	1.01	[5]
(host reference)	AMActin - R:	5′-GACCCACCAATCCATACGGA-3′
References
1	Locke, B.; Conte, Y. Le; Crauser, D.; Fries, I. Host Adaptations Reduce the Reproductive Success of Varroa Destructor in Two Distinct European Honey Bee Populations. Ecol. Evol. 2012, 2 (6), 1144–1150. https://doi.org/10.1002/ece3.248.
2	Mondet, F.; de Miranda, J. R.; Kretzschmar, A.; Le Conte, Y.; Mercer, A. R. On the Front Line: Quantitative Virus Dynamics in Honeybee (Apis Mellifera L.) Colonies along a New Expansion Front of the Parasite Varroa Destructor. PLoS Pathog. 2014, 10 (8), e1004323. https://doi.org/10.1371/journal.ppat.1004323.
3	McMahon, D. P.; Fürst, M. A.; Caspar, J.; Theodorou, P.; Brown, M. J. F.; Paxton, R. J. A Sting in the Spit: Widespread Cross-Infection of Multiple RNA Viruses across Wild and Managed Bees. J. Anim. Ecol. 2015, 84 (3), 615–624. https://doi.org/10.1111/1365-2656.12345.
4	de Miranda, J. R.; Brettell, L. E.; Chejanovsky, N.; Childers, A. K.; Dalmon, A.; Deboutte, W.; de Graaf, D. C.; Doublet, V.; Gebremedhn, H.; Genersch, E.; Gisder, S.; Granberg, F.; Haddad, N. J.; Kaden, R.; Manley, R.; Matthijnssens, J.; Meeus, I.; Migdadi, H.; Milbrath, M. O.; Mondet, F.; Remnant, E. J.; Roberts, J. M. K.; Ryabov, E. V.; Sela, N.; Smagghe, G.; Somanathan, H.; Wilfert, L.; Wrigh…
5	Forsgren, E.; de Miranda, J. R.; Isaksson, M.; Wei, S.; Fries, I. Deformed Wing Virus Associated with Tropilaelaps Mercedesae Infesting European Honey Bees (Apis Mellifera). Exp. Appl. Acarol. 2009, 47 (2), 87–97. https://doi.org/10.1007/s10493-008-9204-4.
