# Supplementary material for: Transcriptomic Responses Underlying the High Virulence of Black Queen Cell Virus and Sacbrood Virus following a Change in Their Mode of Transmission in Honey Bees (Apis mellifera)
Source: Viruses. 2023 May 30;15(6):1284. doi: 10.3390/v15061284 (PMC10303220; doi:10.3390/v15061284)
Supplement: Supplementary file 1 [file viruses-15-01284-s001.zip › Table S2_DESeq2_count matrix_RJP.xlsx]

## Sheet: Tab_summary
Sample name	lib	Viruses	FPF
Control	C1	0	0
Control	C2	0	0		1st column = gene ID
Control	C3	0	0		1st row = sample ID
Control	C4	0	0
Control	C5	0	0
Control	C6	0	0
Control	C7	0	0
Control	C8	0	0
Control	C9	0	0
FPF	FPF1	0	1
FPF	FPF2	0	1
FPF	FPF3	0	1
FPF	FPF6	0	1
FPF	FPF7	0	1
FPF	FPF8	0	1
FPF	FPF9	0	1
BQCV/SBV-feeding	VF1	1	0
BQCV/SBV-feeding	VF2	1	0
BQCV/SBV-feeding	VF3	1	0
BQCV/SBV-feeding	VF4	1	0
BQCV/SBV-feeding	VF5	1	0
BQCV/SBV-feeding	VF6	1	0
BQCV/SBV-feeding	VF7	1	0
BQCV/SBV-feeding	VF8	1	0
BQCV/SBV-feeding	VF9	1	0
BQCV/SBV-feeding + FPF	VF+FPF1	1	1
BQCV/SBV-feeding + FPF	VF+FPF2	1	1
BQCV/SBV-feeding + FPF	VF+FPF3	1	1
BQCV/SBV-feeding + FPF	VF+FPF4	1	1
BQCV/SBV-feeding + FPF	VF+FPF5	1	1
BQCV/SBV-feeding + FPF	VF+FPF6	1	1
BQCV/SBV-feeding + FPF	VF+FPF7	1	1
BQCV/SBV-feeding + FPF	VF+FPF8	1	1
BQCV/SBV-feeding + FPF	VF+FPF9	1	1
BQCV/SBV-Injection	VI1	2	0
BQCV/SBV-Injection	VI2	2	0
BQCV/SBV-Injection	VI3	2	0
BQCV/SBV-Injection	VI4	2	0
BQCV/SBV-Injection	VI6	2	0
BQCV/SBV-Injection	VI9	2	0
BQCV/SBV-Injection + FPF	VI+FPF	2	1
BQCV/SBV-Injection + FPF	VI+FPF	2	1
BQCV/SBV-Injection + FPF	VI+FPF	2	1
BQCV/SBV-Injection + FPF	VI+FPF	2	1
BQCV/SBV-Injection + FPF	VI+FPF	2	1
BQCV/SBV-Injection + FPF	VI+FPF	2	1

## Sheet: TableS2_DESeq2_count matrix
Gene name/ sample ID	C1	C2	C3	C4	C5	C6	C7	C8	C9	F1	F2	F3	F6	F7	F8	F9	Bf1	Bf2	Bf4	Bf5	Bf6	Bf7	Bf8	Bf9	BI1	BI2	BI3	BI4	BI6	BI9	Bff1	Bff2	Bff3	Bff4	Bff5	Bff6	Bff7	Bff8	Bff9	BfI3	BfI4	BfI5	BfI6	BfI7	BfI9
2023-03-06	247	512	627	741	725	731	502	203	323	637	990	924	1068	892	690	513	1107	1291	933	1105	1176	1011	800	441	951	395	351	336	601	484	234	1116	2130	1634	1321	1683	1081	436	1081	327	648	374	476	583	439
18-w	110	89	448	238	175	115	106	22	267	245	388	258	295	207	149	107	329	524	402	367	547	241	197	87	417	76	87	64	167	152	38	393	758	678	589	569	387	93	373	88	116	77	158	159	137
5-HT1	47	86	93	73	102	37	63	42	55	75	69	54	85	93	26	38	125	99	75	88	78	98	99	41	80	21	21	22	22	32	23	63	257	112	73	135	83	47	46	26	26	36	37	37	35
5-HT2alpha	11	11	16	17	17	11	11	2	11	10	19	9	25	23	12	5	22	21	34	20	23	16	18	10	14	5	7	4	8	13	7	27	60	33	28	28	16	16	20	14	15	14	31	7	6
5-HT2beta	2	1	12	3	5	4	9	10	20	13	11	6	8	21	18	17	10	23	9	14	22	18	29	9	13	7	2	1	6	11	13	20	34	24	18	7	11	9	14	7	7	5	3	16	11
5-ht7	1	1	4	3	0	5	0	1	1	3	3	5	4	2	4	1	4	6	3	7	12	5	2	4	5	2	2	1	6	1	4	8	11	6	8	12	4	6	6	1	15	7	12	2	5
A4	1960	3760	2401	2399	4271	3705	3374	2743	1414	2501	5513	4146	3119	1836	2822	3724	4280	2868	2849	2063	1992	2754	2167	1995	1723	2197	418	1430	2035	659	3519	2216	7235	7315	3887	4659	3248	8550	3487	438	1938	532	682	1435	983
Abscam	7	9	20	12	33	12	9	5	6	25	30	9	33	19	9	10	27	37	32	43	29	30	20	5	29	5	10	5	9	7	14	34	62	41	29	47	21	7	13	3	13	7	16	26	11
Ac3	17	23	45	39	74	34	19	6	23	52	67	23	72	56	32	23	76	96	63	82	84	45	42	19	49	9	30	12	24	37	7	84	217	102	105	159	82	22	64	26	39	27	33	48	26
AChE-2	23	12	52	32	32	32	43	9	23	37	72	35	111	55	46	32	142	149	133	153	146	60	63	9	62	23	40	13	20	52	53	110	315	166	95	176	69	31	97	20	22	15	8	57	45
Acph-1	107	183	114	209	225	97	70	21	50	215	297	223	205	226	136	109	370	399	179	291	169	197	167	112	236	109	169	150	221	150	55	206	399	589	385	281	306	202	266	209	421	166	274	210	175
ACSF2	200	297	260	416	330	257	260	167	118	301	418	296	268	220	196	214	374	263	205	166	193	219	213	216	116	80	47	36	57	28	108	204	401	476	248	273	289	389	324	34	74	21	23	95	32
Adar	128	211	284	276	270	175	192	93	172	210	356	339	393	293	174	156	357	418	315	414	402	317	320	171	599	155	228	156	241	279	247	408	948	647	1138	603	311	525	248	171	284	111	123	507	225
Adk1	399	1307	618	697	1242	472	970	673	274	655	787	1335	1046	835	1310	1326	1227	845	627	615	646	913	990	613	339	304	113	231	227	185	1225	800	2313	1166	852	1269	1196	1339	877	73	483	114	158	266	121
AGLU2	40903	31683	43702	44250	56799	57476	28378	16004	49600	38442	63404	85142	59762	33780	30438	32532	75154	58605	63116	60829	34121	65437	44006	32887	64987	44275	18570	23244	40802	22491	49289	37827	163312	112273	71459	72034	57392	101985	43066	10053	52470	15373	26101	39585	26460
Akhr	27	104	87	96	92	140	81	68	43	94	97	135	85	98	88	93	124	85	104	111	73	80	88	70	58	24	18	34	45	17	119	127	287	206	112	166	136	146	103	31	95	30	49	34	40
Amel_8916	12	14	17	11	19	17	8	15	12	13	29	31	23	12	0	6	14	8	12	14	10	15	23	14	8	4	3	0	2	1	19	10	36	22	12	14	15	18	10	2	11	2	5	5	5
Amih	44	77	144	150	183	127	122	73	64	132	154	90	298	258	152	112	252	321	225	344	393	110	143	67	192	66	98	70	96	131	173	330	650	382	475	433	337	220	254	59	76	93	110	175	133
Ant	11136	17259	21592	33778	30520	48972	37763	11029	17871	36234	44157	43025	75315	54361	28631	33557	117393	88053	61565	62286	86559	77496	62837	34896	50096	12860	10911	11134	12435	21860	27544	50401	92874	78319	75277	49947	72852	39964	63250	10939	18381	8602	13321	11965	12280
Antp	5	24	50	35	30	35	49	13	8	21	42	11	83	53	59	42	82	103	65	77	101	29	50	20	75	30	20	19	26	20	68	83	178	124	96	104	86	96	56	8	23	8	23	35	42
Apamin	1418	4882	1330	2318	1931	593	1589	1175	175	1271	1891	2900	593	4016	4880	4161	678	1719	395	539	1303	2899	2884	1667	46	30	21	15	23	40	1570	1645	2225	1564	1437	3699	2939	1744	1941	24	20	16	29	28	19
Apd-1	2624	5215	6714	8531	5046	1761	11654	4765	6635	6205	12196	7713	13971	22309	11317	8751	11110	9306	15525	12055	18837	15274	10437	8296	3876	2510	1623	834	2759	2679	9779	11947	6442	7750	18300	18104	17848	14583	12538	2416	2456	2448	5703	1581	1109
Apd-2	17221	52923	39811	34129	38639	20011	47750	28599	8250	34558	58281	58256	38626	53749	57017	47465	48892	39171	35563	29847	38576	54162	50302	52662	17067	7886	5616	3246	5548	10850	46647	43798	74099	45039	46053	59590	73187	40013	36896	4993	8247	2667	3855	7522	6529
apd-3	3	5	15	6	9	5	8	1	3	19	51	5	16	23	10	5	16	15	23	34	49	9	14	14	6	2	4	10	5	9	2	18	11	22	40	32	23	4	23	10	16	3	4	4	6
Apd-3	1260	6500	4960	8007	5154	317	4880	3914	1384	3269	6500	3395	9160	7068	4850	3746	1720	3523	12643	3065	9989	5632	9969	3081	377	534	320	157	361	512	5863	7436	5253	2117	8217	8946	10019	761	6464	399	450	678	1435	152	177
Apid1	268	1703	3574	338	509	1821	2806	738	1237	1300	1368	1788	252	784	579	1373	1512	307	17248	11966	1004	691	1489	1087	17462	14426	23232	5859	8597	7798	59319	630	1836	4025	13140	1462	399	19267	611	6013	14549	9838	4606	28979	18710
Apime-ASTA	136	146	114	115	85	68	102	60	40	91	159	87	122	138	77	138	98	123	75	80	74	148	126	61	136	50	18	22	20	50	118	76	266	123	130	192	129	139	71	24	57	9	14	40	34
Argk	3212	6419	5897	7561	7951	6102	6015	3330	2675	4221	6407	8877	7492	7095	5927	6264	7047	6469	4866	4320	5613	6418	5745	4882	4103	2122	1520	1442	2015	2141	4758	6836	17437	9539	6708	9329	7617	6264	6539	1321	2775	1388	1725	2707	1872
arm	429	1020	1490	1484	1404	1264	958	261	475	1161	1680	1383	1589	1494	926	736	1620	1806	1401	1504	1656	1462	1216	842	1429	510	506	460	655	710	360	1410	3331	2434	2081	2089	1506	784	1504	471	733	374	574	809	638
Arp1	2550	4628	7933	8043	7190	4778	5033	878	5142	5295	8537	9826	8514	7552	4494	3189	8452	9726	8995	8618	7864	8461	6604	4383	12280	3428	4391	3899	5358	5606	1477	7870	18058	18355	15591	14574	8621	5465	8355	3960	4318	4662	6557	7910	4765
ATP5G2	2629	7412	6501	12481	8513	14894	16714	6124	4629	15594	17862	11667	30234	29043	10948	14188	21024	20574	18619	12642	38824	28098	22462	12095	9981	3479	2415	3218	3993	4038	15635	19689	27747	18139	20258	17904	26008	12356	18171	2014	5569	4694	4931	3691	2670
ATP6	311	1953	1096	1226	1133	1194	2087	1578	629	1531	1038	4840	1848	3432	2463	3086	1178	1206	1783	1651	707	6384	2379	2539	780	559	297	317	316	414	1162	2171	1211	1010	1308	2193	1836	713	1725	161	587	301	322	292	223
ATP8	109	497	254	356	291	307	530	312	145	432	248	493	456	763	612	721	274	379	450	411	206	1337	597	708	195	129	83	83	110	99	167	570	361	294	424	554	416	120	458	54	152	79	91	73	67
aub	21	51	101	46	66	54	51	25	41	90	106	116	101	63	68	66	150	123	91	104	84	82	57	31	71	52	51	41	39	51	64	100	208	207	124	172	80	104	73	36	60	42	45	65	37
B-gluc1	447	1244	1360	473	693	484	1612	606	771	652	805	1896	733	933	1317	1397	1876	1012	1565	811	718	1376	1043	906	1359	709	545	379	400	686	1269	1486	4721	2127	1507	1803	1687	2493	1612	361	1006	211	303	979	575
BBIP1	5	15	25	18	27	17	9	4	17	22	25	33	28	45	28	22	59	46	43	37	44	47	34	10	23	18	11	10	25	12	3	43	83	90	39	73	36	11	37	14	29	14	24	19	6
Blop	146	264	513	324	573	339	377	182	166	457	648	783	591	338	28	170	555	484	324	337	380	527	314	323	328	39	5	6	119	134	396	396	1086	656	369	680	479	555	315	19	237	39	58	61	60
Br-c	6	12	15	12	22	7	3	4	5	9	12	10	19	18	5	4	16	21	27	28	23	12	10	1	12	7	4	2	4	8	9	18	36	15	13	53	28	10	8	8	3	8	6	13	9
Brd7	152	315	385	353	410	404	328	165	120	314	491	514	440	493	340	340	579	569	489	446	481	404	398	283	426	217	157	140	228	202	342	461	1145	830	715	877	680	502	507	144	229	175	178	262	181
brp	35	43	86	66	45	47	57	31	54	46	74	27	147	100	58	46	124	163	123	265	165	53	82	39	147	35	43	25	44	77	84	174	355	186	174	266	136	68	68	50	47	53	77	64	43
Burs	4	20	24	28	14	32	10	9	9	25	37	27	32	26	24	19	37	55	22	44	44	24	21	16	44	20	16	12	14	15	12	35	97	66	47	52	45	14	40	13	21	26	19	17	5
c-mos	9	25	34	22	30	37	28	26	9	28	46	48	22	36	26	38	41	26	20	33	30	32	36	21	19	15	4	11	26	11	42	28	78	66	37	69	30	43	38	11	27	12	19	15	6
C1q-VP	184	288	361	290	430	542	326	210	128	285	458	485	379	372	302	292	422	444	369	552	457	363	245	239	296	212	111	118	150	166	267	442	1144	864	634	571	460	508	429	71	261	101	153	235	123
Cac	17	10	50	49	48	52	15	21	25	42	84	28	123	47	18	19	127	138	137	217	118	37	62	11	61	16	26	10	38	58	51	129	304	147	79	157	73	57	66	24	22	55	45	49	30
cact1	42	80	84	75	135	107	82	44	24	80	136	145	136	139	87	96	170	142	186	162	138	112	108	80	166	78	64	82	118	82	92	127	239	244	233	177	170	225	133	108	137	140	170	84	72
cad	12	68	55	63	34	27	36	13	30	70	69	57	56	65	38	49	51	92	60	60	72	118	84	48	84	26	29	16	30	22	32	72	198	89	96	109	68	27	50	13	53	6	24	37	25
Calpb	530	780	1242	952	1087	1056	1227	542	743	864	1497	1386	1640	1670	1216	1166	1787	1687	1840	1619	1622	1579	1270	790	1141	597	426	484	618	837	1210	1744	4280	2681	2326	2601	2016	1577	1580	396	649	413	571	726	628
Camkii	78	120	321	251	357	272	173	79	118	240	400	244	524	279	228	165	553	729	480	751	586	253	277	141	447	101	178	142	207	233	136	477	1259	705	807	661	405	216	432	138	143	161	293	275	191
Cat	1550	2714	1696	2810	2949	1732	1948	1372	1133	1542	3564	2859	2501	2390	2522	2683	4159	2522	3706	2612	2411	3529	2070	1862	2075	1651	1359	1781	3526	1177	2406	2130	5495	6783	4186	3895	3207	3860	1718	1711	5199	4188	4044	2121	1842
Cbs	112	192	175	203	276	263	236	152	183	215	247	323	259	254	215	238	353	245	408	333	186	297	248	163	303	215	131	148	263	142	322	294	664	466	325	420	366	406	237	161	333	174	291	233	139
Cdc37	401	789	402	375	827	514	528	384	222	321	430	694	636	525	487	598	484	390	373	378	383	675	484	404	313	268	116	137	180	154	763	386	925	621	489	449	599	1030	374	89	272	169	182	204	105
Cdk5	123	214	228	263	278	254	253	109	110	232	391	313	401	320	264	235	392	285	295	367	325	361	287	218	249	118	102	108	184	116	157	323	545	553	343	457	414	286	256	101	221	142	156	142	112
Chmp1	211	560	345	451	727	635	597	488	116	404	596	754	774	533	545	622	563	398	532	418	389	635	485	420	423	278	144	166	255	164	524	382	907	663	623	639	558	834	377	122	372	182	261	245	164
Coq7	56	219	181	306	331	376	374	192	60	295	504	373	507	433	290	351	460	388	366	428	427	401	304	293	276	208	91	158	176	145	312	336	761	563	493	493	412	418	268	71	218	122	165	138	90
COX1	34306	315016	188709	616538	475293	500667	519535	282386	143518	455988	325969	436093	828657	658160	440231	460791	344245	302813	487187	587538	376985	553237	436681	343787	251743	165778	97784	143917	132957	86423	194778	524965	531211	487678	714062	570817	445612	163192	364485	78073	221321	118459	170229	101026	65093
COX2	11712	131224	44836	137263	117949	118549	123660	164660	15649	146493	101717	151447	222047	157462	119133	160897	65939	38292	68096	69666	59775	160041	125712	137376	37024	32762	14009	15707	17767	12971	104686	82873	98003	60664	105466	85786	81889	61699	61993	12000	29815	15090	22203	15319	9049
COX3	850	7666	3176	4029	3623	3928	9141	8062	1294	5013	3435	12575	4904	10890	9994	11347	3416	3435	4146	3843	1908	15581	6760	8714	2030	1668	753	709	770	872	6256	6327	5127	2706	3811	6533	5919	2609	4206	451	1305	547	861	691	635
Cox6b1	854	4023	2565	4327	3505	3317	6609	3657	843	6645	6801	6166	10280	9015	5029	7760	7601	5926	6220	4927	7174	9802	7862	6843	2570	1319	813	1443	1532	992	5736	6384	10598	7195	6855	6017	9141	5860	5215	650	2276	1141	1556	865	704
Cox6c	2630	6323	2752	5279	4635	2680	7166	5328	4877	7069	7367	8858	12084	9740	5979	10412	5279	4383	4586	3898	5655	12379	8085	6626	2420	1765	1004	1693	1879	1018	11030	4344	8029	4316	5392	5831	8055	7623	4191	795	1780	1630	1957	1139	724
Cpap3-b	248	535	707	693	517	244	651	386	232	621	989	300	653	922	636	556	681	625	638	510	927	737	791	802	281	182	116	149	247	147	411	873	793	518	595	971	990	447	649	194	250	296	433	123	138
Cpap3-c	232	474	996	761	903	552	447	154	369	1466	2460	641	1624	1200	853	516	1489	2051	1794	1263	2148	1634	1008	627	744	208	311	101	222	455	297	1404	1172	983	1770	1749	1601	354	1503	477	222	241	514	228	349
Cpap3-d	425	400	727	718	661	427	974	167	152	624	1124	985	835	1324	452	602	1276	1051	1095	918	1351	815	796	706	545	150	209	231	302	297	642	462	2256	893	1118	1241	1594	785	534	207	402	105	107	287	206
CPF1	8	7	13	8	14	9	4	5	3	4	14	12	16	17	8	10	12	14	8	10	10	7	18	6	19	7	7	19	20	9	8	8	28	22	23	16	11	17	18	3	12	10	25	18	7
CPF2	149	194	231	560	469	440	233	303	257	268	891	332	577	392	262	286	297	301	348	354	534	293	429	424	849	1385	422	409	783	667	493	471	616	424	1044	388	348	939	218	496	987	748	691	1290	736
CPR1	0	0	0	2	1	2	2	0	1	0	0	1	4	2	1	0	1	1	2	1	1	3	1	0	2	3	4	4	4	6	0	0	0	2	2	1	0	4	1	4	6	4	12	4	4
CPR11	0	1	2	1	2	0	2	0	0	0	2	1	1	4	4	3	3	2	2	1	0	1	1	1	0	1	1	0	2	0	0	0	3	0	1	1	4	4	1	0	0	1	0	0	1
CPR12	2	1	5	4	4	1	3	0	0	1	0	2	4	6	3	2	2	1	3	5	4	1	3	1	4	0	5	0	2	1	2	2	3	0	5	4	4	6	3	0	7	1	0	0	0
CPR13	29	28	50	37	85	28	35	27	36	30	49	47	44	38	68	54	66	35	68	58	34	44	40	36	38	23	14	12	23	17	95	26	119	85	61	46	42	120	28	9	32	8	9	13	5
CPR14	1720	3331	3612	3738	4339	4663	2730	2122	1085	3058	3912	5504	3228	2986	2773	3199	3945	3008	2625	2509	2435	3765	3613	2736	1308	1850	1199	685	1278	1183	1828	2688	9651	5587	3572	3100	2753	3385	2947	937	2136	1190	965	1458	1066
CPR16	1	0	2	0	2	0	0	1	0	0	1	0	2	0	0	0	6	0	1	2	2	1	0	0	3	1	2	2	0	3	0	0	3	0	0	2	1	1	1	0	1	5	2	2	1
CPR17	10	73	25	53	39	53	53	20	15	56	52	82	72	79	65	46	79	79	25	55	69	56	30	59	35	122	101	72	202	36	22	56	172	57	58	119	92	68	72	151	193	357	362	106	75
CPR18	0	0	0	0	2	0	0	0	0	0	0	0	0	0	0	0	0	0	0	1	2	0	0	2	0	0	0	4	4	0	0	0	0	0	0	0	0	1	0	0	5	5	1	2	0
CPR19	46	217	333	268	118	33	308	147	66	415	935	389	349	720	670	418	300	296	622	242	808	384	539	619	87	50	55	19	42	61	145	910	336	232	555	1053	694	49	526	92	31	50	76	23	39
CPR2	7	8	13	58	23	30	31	6	10	15	32	24	37	24	12	19	25	29	11	9	45	42	23	28	15	33	20	66	31	8	15	45	36	30	19	57	37	22	31	39	35	105	77	26	14
CPR21	0	0	0	5	7	3	3	1	0	0	1	2	3	0	1	2	3	2	11	4	2	0	0	2	2	5	1	1	4	2	0	2	3	4	1	0	0	4	2	0	4	6	3	0	0
CPR22	2644	3868	1796	3676	4686	1300	2662	2070	699	2245	5314	3629	3137	2227	3401	3907	3521	2809	3277	2352	2904	3811	2136	2641	2228	2679	969	1104	1174	1381	2353	2086	4952	4716	2950	2258	2657	3001	2144	879	1848	820	1055	1305	1214
CPR27	13	36	97	113	66	13	91	23	23	138	371	122	183	206	238	127	99	126	113	106	336	229	162	198	80	10	25	12	34	56	33	328	107	98	161	236	162	29	175	66	18	38	79	14	52
CPR28	147	512	377	416	372	211	581	367	88	289	321	781	314	486	666	666	440	410	331	338	394	590	481	468	183	160	125	57	83	152	282	494	981	324	454	572	604	266	567	94	114	70	55	144	91
CPR3	2	10	20	23	19	16	18	3	15	35	46	30	57	31	24	14	24	25	36	7	25	28	18	12	87	6	9	3	8	8	8	18	35	202	13	58	35	16	22	4	13	10	5	15	7
CPR4	28	90	90	60	103	92	71	55	47	107	75	169	106	99	81	84	62	60	70	60	74	89	51	39	53	49	27	35	62	36	87	53	144	85	75	109	92	166	49	29	70	46	31	62	32
CPR5	4	6	34	8	21	18	15	4	5	33	55	41	33	19	8	17	33	21	39	21	35	42	22	46	44	23	19	21	21	37	11	28	53	57	27	36	22	23	19	12	33	16	20	45	41
CPR6	8	7	9	14	4	10	15	2	3	11	36	12	20	11	27	13	31	23	17	14	22	10	13	10	5	2	1	1	3	4	2	21	11	10	4	45	26	3	14	1	0	5	4	1	2
crh-BP	16	55	42	40	83	42	37	23	23	50	67	65	57	51	39	43	85	53	47	57	54	62	51	37	54	25	11	13	16	20	34	51	162	90	88	121	64	86	51	13	35	9	20	25	16
Cry2	28	64	83	130	133	257	175	121	102	107	152	94	438	475	170	196	341	291	333	244	476	144	178	125	190	83	69	47	44	84	100	205	338	307	535	306	370	261	289	26	105	51	93	138	66
Cryl1	2014	1625	2026	1931	2600	2228	1918	1494	1584	1353	2332	3507	2524	2226	1793	2532	2934	2040	2930	2198	1676	2289	2158	1942	3867	3022	1234	1860	3162	1895	5207	1780	6680	6566	6043	3186	2571	12129	1878	691	3532	1219	1822	2567	1550
Crz	1	2	2	2	3	2	1	0	0	4	4	3	2	6	1	2	3	2	1	0	2	0	1	0	1	0	0	0	1	0	5	1	3	3	0	4	5	3	2	0	2	1	0	0	0
Crzr	97	156	143	140	422	408	161	91	124	247	488	182	396	206	189	164	515	474	329	342	251	334	211	165	348	151	140	106	267	269	394	226	711	461	525	480	425	448	189	105	257	132	126	269	242
Csd	43	93	89	87	153	89	117	70	23	114	92	173	169	170	124	112	158	108	160	158	149	131	147	106	126	46	37	55	49	39	75	177	353	224	189	193	152	155	96	35	117	41	53	84	39
CSP1	1492	3269	1107	1555	3038	2644	1096	1180	610	1097	1474	5175	2252	1703	435	1842	1317	1072	1541	1538	1161	2470	3699	2347	393	561	137	134	561	352	2841	1197	3260	1971	2707	1382	2728	1870	1863	109	659	468	271	597	222
CSP2	171	213	277	189	295	249	329	205	126	193	292	252	283	359	345	307	382	252	366	278	302	285	241	269	209	162	79	90	89	133	320	390	746	364	391	432	472	375	277	58	121	48	46	121	94
CSP3	7698	39387	24255	37696	24978	14420	35097	36468	5577	19253	22701	36548	30653	55500	30064	36212	26368	22771	28589	16737	37472	21210	21814	25938	20279	12178	9117	8356	12874	8070	33306	40691	67398	42691	35058	45408	63838	33817	43111	5959	15319	6510	7808	14181	9821
CSP4	5	25	27	13	23	5	35	12	5	16	18	15	23	25	9	14	23	18	29	17	20	21	24	23	18	6	5	3	6	10	31	15	28	34	27	30	29	21	12	1	6	6	5	7	13
CSP6	109	140	107	208	303	52	80	106	57	146	124	200	314	97	96	130	145	70	128	123	80	268	118	64	56	39	25	15	63	22	190	76	235	123	58	111	98	150	75	10	50	25	9	18	10
CTL5	92	494	324	369	305	414	368	270	28	242	410	564	492	442	495	520	408	336	306	325	352	311	289	433	226	188	90	100	152	42	216	355	352	347	427	652	626	533	366	66	208	97	131	98	67
CUTA	62	262	133	131	196	151	192	121	93	138	190	297	184	182	179	222	132	123	137	120	111	223	199	155	86	51	31	41	51	43	141	144	318	228	166	209	162	188	103	28	96	29	55	61	48
Cyp314a1	33	71	104	61	66	76	86	66	37	79	96	94	92	112	91	78	152	131	85	107	134	54	89	68	116	38	36	30	59	52	113	121	301	179	151	226	194	143	113	40	22	44	64	43	43
Cyp4g11	29026	38602	26034	29037	23242	75453	19496	16869	7323	19790	62814	37018	17278	28021	32783	25530	60841	28674	40434	43170	32423	30367	17487	16600	41181	17305	11963	22257	37997	15800	22856	24636	100009	58252	43866	63604	56259	34031	44420	12735	58686	19518	30680	12354	14495
CYP6AQ1	995	1293	976	809	1135	675	855	532	181	862	980	1448	1308	1454	1187	1476	3202	1699	673	492	1579	1990	1933	1676	977	757	226	105	340	408	1111	1250	3926	2615	2112	2012	3194	1465	2498	281	645	174	203	902	363
Cyp6as5	657	650	877	401	678	306	517	382	437	1249	1556	1199	635	732	769	1186	2199	1861	1436	1024	901	1479	1114	1366	2343	2022	1091	786	1165	1544	991	952	3543	2951	2336	1379	2301	1986	1200	691	1733	446	533	1788	1234
CYTB	10154	98671	33980	132286	103320	66218	114533	114821	26910	98235	48370	115944	231490	127820	113807	144298	61788	41613	57801	81079	55617	174685	118765	89313	43358	38623	19440	21923	24771	14927	92338	102930	101201	58363	139778	110210	77307	54968	67761	14286	46994	20253	30642	17170	12644
CytC	891	2094	1915	3894	3372	7324	4570	1748	1751	4424	6097	4900	10510	6701	3628	5076	15938	10941	10134	8125	9499	8812	6749	4064	7123	2452	1495	2100	1932	1852	4637	5985	15643	11531	9634	4606	9269	5760	8737	1051	3995	1424	2207	1508	1401
Dat	28	52	41	50	61	35	41	9	9	48	99	57	107	57	42	43	100	92	94	99	57	70	44	34	139	95	42	24	71	91	30	86	121	144	123	76	94	64	73	39	60	53	48	82	63
Dcr-1	32	69	79	46	102	74	72	36	54	58	90	114	131	121	97	90	148	169	163	178	131	107	134	32	163	62	52	45	74	95	110	243	349	263	259	368	195	162	165	55	90	66	84	108	56
Def1	1157	3255	6642	1369	3215	1834	5859	1563	3268	5713	2338	12592	1970	2578	975	7372	1791	783	10760	6302	1826	3174	9577	8006	3418	3341	3346	2104	3858	3625	23089	2817	4177	3835	2026	3297	3734	4194	5135	2167	6952	4345	2116	2007	4351
Def2	0	13	20	5	11	0	5	0	0	3	15	0	1	4	0	1	1	2	9	9	28	0	1	14	5	7	10	0	11	5	5	0	1	11	3	6	3	1	1	1	9	13	10	5	0
DHRS4	318	700	319	325	459	372	298	291	245	353	508	848	336	419	379	512	414	317	307	294	255	580	431	358	265	220	103	111	169	128	454	304	837	676	415	530	504	746	328	64	288	66	94	162	79
Dl	90	203	278	271	312	309	288	151	114	305	427	392	503	374	354	294	498	548	465	661	542	356	389	221	506	193	218	207	340	233	243	596	1030	830	767	929	551	379	465	271	305	343	420	334	251
Dll	17	15	34	42	22	24	12	2	11	46	52	11	70	34	31	23	79	85	27	74	152	53	40	20	37	13	13	10	18	34	8	57	91	93	80	109	81	33	70	33	22	23	33	32	27
Dnmt1a	11	14	36	19	23	24	47	28	12	10	18	25	37	46	36	35	26	27	35	47	27	14	36	15	50	32	8	10	22	16	65	79	132	55	45	75	52	43	60	13	26	13	17	26	11
Dnmt3	69	86	146	134	153	163	133	62	64	94	167	118	186	189	181	148	246	247	231	200	285	139	147	64	184	76	82	57	78	102	211	300	599	242	350	337	264	277	261	73	108	81	114	116	75
Dop1	10	5	18	15	39	20	16	4	7	23	27	25	28	19	21	14	30	24	23	24	26	10	29	3	19	9	4	7	11	12	9	29	76	38	23	29	24	11	17	9	6	11	17	14	2
Dop3	1	0	7	4	16	8	0	0	1	12	6	1	6	2	0	0	7	12	14	11	7	4	7	2	3	0	2	2	2	4	1	12	14	13	14	7	2	3	6	2	0	0	3	5	5
DopR2	5	6	8	8	10	16	10	1	6	9	16	6	10	14	6	4	13	19	11	2	14	8	7	3	22	6	3	6	8	6	2	20	50	13	22	25	14	2	10	2	6	6	5	8	4
Dscam	50	55	247	145	208	106	70	18	36	169	328	104	259	210	99	58	239	412	217	514	465	182	117	39	277	66	117	73	132	185	56	385	657	279	329	613	202	53	219	169	83	159	250	185	145
Dsx	17	29	40	46	50	55	36	14	23	50	87	46	78	56	37	25	94	159	76	135	103	74	73	31	99	24	35	32	60	76	31	91	206	212	137	112	83	37	93	41	37	43	62	56	39
E74	18	48	100	97	69	96	47	17	31	74	122	72	150	95	79	62	149	217	92	135	246	87	96	42	117	33	36	41	37	58	48	160	258	171	193	203	146	56	155	47	47	50	80	68	52
E75	248	301	990	713	558	554	620	183	489	569	1324	439	1092	760	591	495	1098	2071	1380	1115	1402	719	853	268	1266	380	371	384	581	600	608	1292	2906	1503	1459	1911	1247	828	1030	621	416	597	999	733	650
Eaat-2	83	123	230	182	402	204	114	58	104	256	327	259	457	198	147	131	363	283	254	283	265	178	221	130	324	152	121	98	172	174	136	179	506	320	412	302	255	286	192	136	200	116	134	204	171
ecd	46	86	108	136	121	207	149	110	69	112	199	179	211	201	186	182	272	281	231	260	254	207	203	78	219	86	111	77	114	124	192	328	505	419	355	447	333	315	266	117	166	110	128	167	97
Ecr	98	79	269	171	99	187	139	79	145	106	266	76	407	207	190	153	482	566	456	564	669	204	265	131	575	237	209	250	263	339	171	596	1189	856	773	705	588	375	385	181	141	316	389	421	336
Ef-1a-f1	948	2018	2976	4093	2843	2920	3793	1160	1874	2904	5646	1996	4720	5259	2910	2373	4273	4842	4126	3738	6966	4500	3141	2867	3856	1359	1259	1518	2115	1395	1535	6137	6214	5594	3688	5887	6264	1747	3263	1536	1575	1614	2174	1754	1317
EF1a-F2	4750	10410	11431	11466	10355	11510	9019	5158	6108	9803	14919	16263	11166	12860	9379	9241	14393	12506	11707	10785	14688	12554	12084	10254	11882	7235	5069	5502	8311	6422	8174	13034	26692	21040	15786	20947	18784	13106	14004	4872	9985	6276	7493	7754	5614
egh	147	259	251	248	328	291	264	112	227	167	241	441	388	274	239	219	445	310	369	330	240	300	232	180	442	204	153	176	285	186	265	315	835	724	552	601	425	507	309	129	352	190	273	233	192
Eif3h	233	645	444	393	613	448	471	391	229	465	578	714	566	584	510	689	598	452	454	431	389	624	587	467	407	274	180	179	215	224	395	501	1071	727	654	726	651	701	403	140	388	179	213	228	145
Eif4g	435	977	1845	1802	1671	2456	1327	612	863	1519	2705	2124	3584	2335	1652	1414	3760	4495	3675	5153	3822	1949	2160	854	3765	1099	1425	1433	2076	1742	1504	4069	7326	6737	5922	5433	3345	2099	3648	1737	1899	1981	2891	2204	1851
Emc	204	679	1074	1157	1460	1045	1344	311	657	1056	1088	674	1375	676	736	613	1144	1149	929	687	1005	1161	1286	613	1370	507	628	457	522	638	1038	830	1896	887	1702	1248	1101	1916	617	368	587	354	706	1057	756
EphR	50	48	133	93	62	57	60	12	56	86	158	38	145	119	80	49	154	237	134	186	222	95	73	43	202	66	107	93	95	128	40	205	334	282	319	308	123	62	206	94	80	112	137	141	137
Err	95	155	239	182	199	266	184	94	61	176	287	216	233	211	172	161	415	401	306	279	245	229	205	153	250	117	84	91	114	126	212	291	684	356	352	380	296	308	246	98	144	82	137	150	110
Est-6	13	46	5	12	4	5	8	3	0	4	6	25	0	74	36	27	4	10	7	6	5	14	17	9	6	0	0	2	2	2	10	22	18	21	4	59	74	16	40	0	5	1	1	3	4
Eth	4	7	13	12	18	50	4	8	3	7	3	13	21	12	13	12	12	12	7	9	10	8	8	7	3	0	1	2	2	1	9	9	1	3	16	2	12	23	9	0	2	3	3	3	0
Ets97D-like	43	76	118	86	93	121	126	86	62	77	132	140	166	146	126	121	223	160	164	175	179	129	141	101	188	76	61	65	103	81	218	163	414	312	226	244	247	329	155	67	126	67	84	100	64
eve	0	2	3	1	2	1	3	3	2	1	4	7	2	7	6	7	6	5	0	4	9	3	4	2	3	1	1	4	2	5	0	3	19	3	5	9	5	3	3	4	1	1	1	0	3
Eyg	3	3	13	10	11	2	10	3	6	14	25	5	18	16	17	15	25	25	21	16	32	14	22	15	31	2	5	3	2	13	13	35	48	56	13	32	26	7	7	7	5	7	9	4	3
Fabp	1301	5568	3157	2975	3133	2523	2579	2022	914	2190	2766	4690	2965	2742	2892	3129	3017	2235	2520	2874	2149	3140	2915	2561	1727	969	520	665	1010	871	2922	2421	6864	3468	2618	4228	3639	2590	2700	354	1292	460	371	829	503
FAR1	433	456	574	477	750	893	633	373	205	416	833	1070	899	691	468	633	1946	1459	921	1133	1020	511	630	502	1114	440	901	241	403	585	938	1077	2772	1706	1489	1607	1338	1375	1327	437	525	178	243	796	631
Fem	56	170	197	165	221	199	230	112	77	153	236	227	274	290	231	223	358	270	237	330	272	185	243	125	292	118	125	110	129	145	269	360	823	453	423	493	312	268	229	82	203	105	152	165	103
Fibroin1	7	11	6	6	7	2	10	2	4	1	13	5	7	9	7	8	16	3	9	7	2	2	5	6	3	1	2	2	6	1	5	13	16	7	5	1	8	10	3	7	8	5	8	3	1
Fibroin2	2	0	3	5	4	1	4	5	1	1	4	1	2	4	1	2	5	3	1	2	5	3	4	0	4	1	1	1	2	0	4	5	6	4	3	2	1	1	1	0	1	4	2	1	7
Fibroin3	2	1	0	0	1	1	1	0	0	0	0	1	1	0	0	0	3	1	0	1	0	0	1	0	1	0	1	0	0	1	1	2	1	2	0	2	2	3	0	0	0	0	0	0	0
Fibroin4	25	10	10	20	38	6	35	10	23	5	9	9	23	34	28	28	23	16	16	8	7	29	30	24	18	5	9	1	4	6	17	35	54	32	20	38	61	66	24	1	10	2	11	6	4
For	245	548	780	735	779	783	605	209	583	670	794	889	964	957	662	544	971	1237	879	1270	909	1017	963	542	956	436	539	407	518	541	313	893	2392	1533	1426	1600	1212	666	1073	447	598	461	640	791	483
Foxp	48	74	157	113	131	88	101	61	45	99	137	88	162	139	94	79	170	223	186	180	240	83	148	42	152	45	93	78	88	113	160	224	373	249	232	265	197	191	129	97	63	97	126	113	94
Fstl5	59	88	89	108	142	129	134	74	58	97	165	182	229	170	116	103	207	203	203	206	221	120	127	88	131	74	46	63	77	91	109	202	441	268	240	333	259	162	155	54	126	67	69	86	74
Gat-1B	98	162	197	112	282	161	139	89	120	223	278	297	387	247	156	181	398	248	285	259	237	226	248	131	186	102	57	65	83	111	312	234	689	499	234	396	279	297	213	42	170	38	58	133	93
Gat-a	35	57	66	37	75	58	49	30	47	65	119	92	133	61	58	53	116	89	68	89	90	66	54	37	125	60	44	29	82	92	54	73	185	112	171	154	106	149	84	31	97	25	36	90	75
Gb15078	23	32	38	45	65	34	54	28	29	32	61	56	39	31	36	29	43	24	48	36	34	32	28	40	34	24	8	21	26	22	57	35	110	64	38	62	45	72	27	9	41	16	15	27	6
Gfat2	958	2389	2431	2784	1362	1690	1540	302	1894	1988	3005	4933	2101	2643	1380	1147	2909	2449	2620	1714	2221	3208	1479	1557	3583	826	867	1363	1554	1451	685	2301	3624	4875	3453	3798	2912	2028	2068	730	1381	707	1092	2038	1386
GlnS	3297	3688	4247	4758	8092	7929	4383	3116	3703	4842	7543	7227	10053	4998	4293	4818	9109	7324	6788	10479	5772	5445	5662	4074	5697	3320	2332	2257	4273	3533	7532	4175	14314	12483	9647	6928	6502	10610	4971	2183	5229	2713	4342	4477	3347
Glob1	1179	1565	1726	1421	1359	1382	1732	1444	748	1144	2042	1852	1544	1693	1602	1900	2517	1481	1911	1187	1698	1579	1423	1432	1347	898	608	506	716	596	2169	1590	3869	3031	1602	2250	2189	2646	1672	468	1019	270	303	924	629
GluCl	138	149	421	396	431	230	251	68	204	294	591	382	620	593	490	303	867	905	659	800	890	290	290	160	602	151	239	264	407	306	97	906	1630	1517	990	1363	606	206	552	211	264	258	442	287	203
Glurb	5	8	18	19	14	12	9	3	7	14	20	17	28	12	8	7	24	23	33	40	37	15	19	7	19	11	7	7	17	10	5	37	68	37	31	30	19	9	26	9	10	7	9	15	7
Gpdh	656	940	943	1013	2069	1797	853	623	926	1172	1859	1737	1417	1279	1347	1446	2400	1585	1471	1481	1124	1723	1507	855	1247	890	403	414	733	466	1169	1254	4929	4452	2489	2119	1369	3782	1321	315	1079	369	391	680	398
Gr10	26	54	48	69	82	50	45	30	18	30	54	56	49	59	57	59	74	49	55	54	72	47	49	27	37	15	17	17	21	19	36	54	211	82	74	84	67	85	49	5	23	12	7	17	19
Grd	13	45	47	30	51	49	28	26	11	56	51	62	57	50	47	32	53	61	43	50	54	42	55	39	51	18	18	20	23	18	37	72	146	73	63	104	61	38	47	24	34	29	36	39	15
Grp	8	14	7	19	12	9	16	6	2	3	15	3	8	37	38	24	20	37	12	12	35	16	10	27	5	12	2	6	9	7	12	20	31	18	25	51	59	32	10	7	13	2	5	5	6
Gstcd	46	159	108	109	119	153	149	116	65	119	138	165	166	168	172	180	184	184	182	166	190	132	150	88	190	90	54	62	93	68	191	237	423	290	245	324	272	198	165	27	98	35	35	80	31
GstD1	2609	8337	5164	4579	5819	3425	4884	4458	785	3739	4724	6515	4528	6068	4809	6119	6824	4448	4756	3098	3909	5550	4820	4529	5052	3339	1532	1923	2019	2154	5028	3613	11607	7882	6205	7893	6809	9049	3396	758	3145	547	714	2507	1568
GstS1	1212	3045	1654	2557	3369	1630	2035	1254	1497	1202	1803	3330	2504	1857	2077	2736	2208	1896	1524	1796	1440	3352	1658	1747	2559	1511	659	746	1368	923	2563	1571	5328	4318	3306	3328	2729	5455	1856	543	1813	514	933	1486	655
GstS4	2	11	4	12	16	19	12	7	2	6	6	14	7	17	15	20	17	4	8	12	8	8	12	13	1	9	5	3	4	1	19	11	44	19	17	5	12	16	7	3	2	1	3	7	0
Gtpx1	1082	3008	1767	1674	2536	2120	2619	1566	1104	1769	2375	3402	2421	2721	2642	2769	2896	2072	2390	1845	1852	3119	2443	2191	2040	1527	744	841	1515	871	3295	2347	4885	3599	3242	3688	3725	4570	2185	589	2164	1079	1272	1072	772
Gycbeta1	31	80	91	92	134	97	78	21	48	78	135	88	136	97	63	42	113	114	85	95	106	109	97	63	72	28	12	21	37	33	31	101	245	155	100	149	93	47	75	22	53	12	35	34	23
H	17	71	108	102	94	95	73	19	12	100	120	107	163	122	90	62	154	166	132	159	153	127	109	65	120	60	63	43	56	67	24	151	261	246	239	258	169	47	132	70	86	50	83	80	63
Hb	0	0	0	0	0	0	0	0	0	0	0	0	1	0	0	0	0	0	1	1	0	0	0	0	0	0	0	1	0	0	0	1	0	1	0	1	0	1	0	0	0	8	2	0	1
Hbg2	76653	74793	79220	73481	115066	80191	83290	48641	67676	52107	89887	75528	74731	90940	67535	57771	69207	78194	74857	55445	67550	100414	57143	40502	66287	51062	10593	29360	50750	13300	45176	46382	180843	141195	55933	100202	91676	91060	54148	4286	50736	10690	24982	26395	27517
Hbg3	3001	3002	9674	3342	5179	3415	4981	1805	1766	13972	4150	38518	12939	7891	1505	8746	18892	6477	12478	8133	12311	7822	28472	23002	4044	8050	3329	3627	6540	3387	17667	6088	16809	86999	6854	11250	15133	16281	37472	2442	7608	6734	7828	5332	3894
Hex110	12	22	29	25	16	60	13	11	18	23	18	34	21	21	14	20	24	28	19	42	34	21	16	7	16	10	3	15	59	6	8	23	67	36	17	26	31	33	22	39	40	100	65	49	15
Hex70a	35	49	63	51	69	738	79	41	42	54	76	105	46	72	146	121	67	79	91	89	47	53	72	60	88	71	15	34	47	33	65	151	336	329	94	167	94	220	87	17	101	18	53	100	27
HEX70b	49	102	83	92	152	168	107	90	38	106	120	149	77	90	76	128	83	71	117	79	68	99	134	93	93	47	18	31	39	31	114	73	308	115	144	149	111	169	89	28	50	26	42	52	38
Hex70c	11	29	45	54	27	22	37	18	16	30	21	66	37	46	37	31	29	22	29	30	42	38	20	32	23	7	5	5	11	10	20	37	70	47	44	57	37	36	34	14	13	22	17	14	6
Hiscl1	14	22	15	25	31	23	10	1	8	28	39	28	40	17	5	10	41	28	23	41	44	20	34	11	23	5	5	9	9	21	18	47	97	49	38	44	27	18	21	5	22	13	8	4	11
Ho	98	391	191	182	311	193	285	201	122	288	332	495	302	403	345	405	300	281	237	217	206	526	332	247	195	150	77	77	85	76	242	315	479	358	285	466	361	316	287	56	200	43	77	104	55
Hsc70-3	2268	3363	3628	2850	4513	5849	2714	2098	2338	2206	4227	4403	4143	3125	2866	3136	6285	4748	5828	3870	3885	2678	3623	3256	5487	4017	2430	2074	2735	3607	5197	4260	8226	9850	6046	6081	5310	10080	4878	1665	3244	1808	2731	4639	1859
Hsc70-4	13922	19268	23936	26808	35968	33116	18938	9435	9944	17231	31848	29984	33983	24680	13941	15272	35996	39157	26040	28679	39932	31006	29181	17553	19447	10147	8157	6119	11381	11371	18886	26327	62889	44020	34317	34286	35455	31312	33338	6165	12416	7708	9361	12977	8487
Hsc70-5	582	1327	1749	2359	1707	2636	2117	837	728	1881	3378	2514	3592	3666	2243	2082	4402	4947	3377	3628	4803	3051	2777	1719	3082	1206	1067	1157	1560	1261	1473	4824	6606	5329	4058	4891	4737	2063	4105	1245	1750	1541	1979	1431	1159
Hsp90	5042	3874	5612	4166	9672	6613	4524	2748	1640	1853	3421	4916	7068	5731	1928	3633	7643	15054	6409	6713	14490	6997	10944	5164	3093	1999	1158	1298	1581	1977	11920	10517	20763	12243	5471	5935	18132	17742	15523	949	1756	1921	2315	2168	1107
IF-2mt	113	279	241	191	263	361	510	409	148	219	247	407	398	612	406	560	459	493	415	415	429	380	424	238	416	205	111	119	177	166	827	639	1091	614	497	801	736	751	428	92	194	89	133	158	119
ILP-2	19	50	24	34	26	44	42	23	20	30	42	62	51	40	38	32	56	43	54	49	42	58	26	31	37	33	28	17	35	17	43	37	87	75	68	58	59	75	55	15	46	33	25	28	18
Imd	65	255	185	100	220	159	250	169	135	181	202	261	263	206	234	280	245	180	281	293	175	222	249	148	168	120	73	68	113	91	322	284	422	454	239	425	276	291	180	62	156	78	123	132	66
Ing3	23	66	57	58	55	80	61	25	20	63	82	91	129	108	66	62	119	166	75	95	128	108	99	50	96	47	32	29	51	40	43	79	160	138	127	119	123	40	143	23	60	43	63	41	33
InR-2	12	7	84	44	27	71	31	7	43	42	118	36	65	60	40	25	121	178	72	292	206	47	34	10	132	16	58	54	50	83	32	166	146	176	123	186	80	35	71	53	18	30	49	49	74
INTS8	36	133	111	105	155	122	116	92	38	114	163	202	186	200	148	144	213	189	159	188	151	168	122	95	136	74	47	56	91	68	130	185	328	339	248	287	215	174	177	54	106	58	80	86	55
Ip3k	93	172	227	212	393	298	225	119	190	201	287	249	350	294	212	191	354	332	304	353	340	232	284	145	329	160	121	131	150	186	272	266	707	508	508	516	415	477	312	114	245	92	142	277	163
JHBP-1	883	2070	2955	1786	1600	794	1823	1769	686	1166	2381	2402	1155	2804	2112	3064	3515	1986	2298	1266	1777	1670	2313	3184	2326	1465	1549	685	917	765	3988	2489	7403	5024	3013	2162	4329	4110	2675	1049	1336	476	492	1404	679
Jhe	202	1064	301	649	253	266	252	298	96	216	289	741	418	499	528	446	251	425	353	295	455	210	460	454	218	334	30	78	145	70	380	754	1800	1560	611	766	901	483	1080	20	58	41	38	108	32
Jtb	21	42	40	28	52	30	52	17	27	61	71	59	59	57	58	64	60	84	72	57	51	66	63	29	41	22	10	18	14	28	31	68	122	106	91	108	56	29	50	11	43	10	15	30	14
KAT2A	61	88	91	89	122	126	112	109	67	113	176	160	234	172	126	155	181	238	183	242	182	179	146	61	231	94	50	65	90	88	184	231	378	287	267	283	298	247	174	57	115	83	83	128	59
Kr	3	6	12	2	4	7	5	2	9	9	5	8	10	8	3	3	12	6	26	4	12	4	5	2	9	5	7	3	6	13	11	9	37	32	20	12	4	17	12	2	4	12	6	6	8
Kr-h1	8	30	116	141	96	122	112	9	53	236	294	83	198	6	63	36	230	408	202	215	319	172	213	26	243	28	100	87	101	133	20	211	185	158	364	400	185	34	318	91	128	110	186	120	101
LCCH3	4	10	17	21	35	20	12	15	10	12	18	19	16	17	8	5	31	21	35	29	17	17	19	7	20	3	10	6	5	6	18	22	41	28	29	33	19	15	15	4	15	7	14	10	3
Lin-52	97	127	121	144	159	195	183	130	81	138	184	227	170	254	156	289	240	184	209	181	215	168	147	129	150	82	39	54	73	75	232	206	340	269	268	271	325	355	150	35	115	44	63	77	40
LOC100187599	4	10	7	6	16	3	6	5	1	8	10	4	10	10	15	12	8	2	7	16	4	9	10	7	3	4	1	2	2	4	11	4	13	4	3	18	13	7	4	3	8	0	2	3	2
LOC100188904	6	3	2	3	5	1	3	4	1	3	0	0	14	7	0	2	8	4	6	4	1	5	4	3	5	3	1	0	7	4	12	7	3	9	7	7	17	0	5	1	5	3	0	2	1
LOC100188940	235	855	547	859	825	877	774	585	247	840	1071	1065	1162	940	807	955	1014	842	821	898	882	1339	970	750	749	561	305	418	583	373	858	1089	1559	1131	1065	1067	1073	902	746	359	740	496	597	443	287
LOC100217360	246	303	474	242	702	335	354	254	192	369	485	657	722	363	86	322	715	474	468	417	506	669	574	349	394	58	24	16	162	184	750	552	1617	698	634	824	609	883	497	31	345	44	42	94	56
LOC100302106	1762	4657	2910	3656	4651	4056	7010	5685	2166	5046	5634	7871	9464	8695	5823	8310	7389	5116	5643	4420	4582	10047	7364	5986	3831	1703	707	1205	1629	1223	12565	6283	11097	7469	6354	7232	9678	10436	4574	650	2548	1047	1400	1173	763
LOC100379261	100	171	245	204	261	205	211	93	99	240	296	278	324	298	233	191	378	331	240	245	326	270	221	158	175	79	69	65	97	100	119	287	642	387	296	592	421	214	273	72	123	84	98	102	70
LOC100576082	10	18	19	12	10	16	10	8	9	22	18	22	21	15	26	25	44	32	49	48	39	16	22	8	41	14	10	8	14	22	11	55	59	61	74	82	50	42	34	9	20	6	17	31	19
LOC100576085	106	179	177	203	226	223	188	72	115	275	350	350	274	265	233	170	435	351	311	327	361	277	295	177	334	156	118	144	214	173	135	343	534	551	403	455	387	260	345	145	251	145	199	207	149
LOC100576088	145	538	352	330	602	304	598	381	48	459	407	747	731	733	582	707	416	363	453	376	308	839	521	403	270	187	72	119	176	103	585	497	771	606	463	667	606	607	377	54	159	83	129	132	94
LOC100576093	0	0	0	0	1	1	0	0	0	0	0	0	2	0	1	1	1	0	2	1	0	0	0	0	0	0	0	0	0	0	0	1	0	0	0	0	0	0	0	0	0	0	0	0	0
LOC100576096	1	11	36	2	11	2	4	2	2	15	9	18	12	6	8	5	3	3	5	6	15	6	5	6	9	2	2	3	5	3	7	8	29	54	7	12	4	26	4	4	7	6	5	8	2
LOC100576097	17	11	43	57	29	17	24	4	4	18	34	32	29	33	20	14	30	59	24	38	43	33	29	18	35	15	16	9	12	16	6	35	138	43	46	66	32	4	26	20	22	5	18	14	12
LOC100576098	22	100	49	61	57	64	75	35	29	54	71	96	61	66	72	95	56	48	43	52	43	88	66	93	39	31	14	9	26	23	95	68	144	61	65	98	65	70	53	10	32	6	16	26	8
LOC100576099	7	32	13	18	41	22	33	19	11	20	13	30	31	36	37	41	30	12	9	20	15	35	24	16	19	18	5	2	8	7	26	23	41	28	23	45	27	45	18	0	19	1	5	8	3
LOC100576100	2	4	9	4	6	2	6	11	1	4	4	12	7	12	5	8	13	1	4	4	8	10	12	1	5	1	1	0	2	1	9	7	21	11	7	8	8	7	7	0	2	2	1	2	2
LOC100576101	70	368	307	209	431	291	299	187	60	346	314	498	431	497	486	490	360	316	314	328	233	500	422	273	317	146	100	88	147	119	278	446	768	432	396	598	413	244	296	73	192	86	104	149	96
LOC100576104	78	142	115	121	247	214	250	203	59	150	171	223	376	264	260	330	278	200	239	200	174	188	174	112	174	102	58	66	99	59	404	190	452	363	295	381	357	469	205	53	157	74	144	116	70
LOC100576106	13	69	55	68	69	66	38	14	16	60	78	86	62	57	59	54	88	68	94	72	52	70	73	64	71	50	24	39	49	39	21	80	104	98	106	131	82	41	65	30	56	56	60	40	35
LOC100576110	47	105	101	106	115	179	78	39	23	110	139	184	77	73	106	108	73	125	77	41	59	104	116	79	36	30	20	27	31	31	58	112	242	183	130	167	136	121	113	14	45	16	29	35	29
LOC100576115	0	0	0	0	0	0	0	0	0	0	0	0	0	0	0	0	0	0	0	0	0	0	0	0	0	0	0	0	0	0	0	0	0	0	0	1	0	0	0	0	0	0	0	0	0
LOC100576116	73	146	144	118	148	165	138	69	79	153	184	201	202	190	150	157	218	164	157	210	163	186	146	115	224	126	113	98	146	121	164	181	413	274	286	287	227	240	154	143	162	161	182	128	116
LOC100576118	49	80	42	62	92	135	62	31	42	34	78	185	159	65	34	74	124	91	94	131	98	125	97	55	14	22	17	9	20	25	66	70	274	70	183	125	157	53	82	15	32	11	36	22	16
LOC100576121	1	3	4	5	6	12	4	0	4	11	11	4	11	14	3	3	14	8	10	29	13	9	7	3	20	5	7	9	13	5	3	9	14	6	14	19	13	1	10	6	9	3	8	8	6
LOC100576125	20	111	78	59	93	64	115	48	18	86	105	114	84	123	93	113	81	57	94	80	63	135	69	60	62	39	13	23	45	14	74	92	175	129	93	187	110	91	78	26	75	32	37	40	27
LOC100576126	1	2	2	9	5	1	0	0	1	0	20	3	9	1	4	2	3	6	2	2	3	0	0	2	2	4	0	1	0	0	1	1	5	4	3	3	3	15	2	2	2	0	2	0	0
LOC100576128	2	5	5	3	7	8	5	4	2	5	6	7	13	6	5	5	7	7	8	9	9	10	6	3	15	4	8	7	29	8	3	6	34	19	23	22	8	10	12	9	13	25	41	9	5
LOC100576129	11	8	33	16	25	24	14	4	20	18	40	5	40	23	10	11	28	53	24	36	46	27	17	12	34	18	14	11	38	26	3	36	48	46	58	51	37	18	24	21	16	30	55	38	29
LOC100576130	5	10	19	15	20	26	11	5	10	16	38	30	14	22	18	15	24	23	13	10	12	12	16	6	19	7	8	4	3	4	7	25	42	38	28	28	17	6	13	4	7	10	5	10	3
LOC100576131	9	18	36	36	25	26	23	3	11	38	40	45	33	46	37	26	53	87	48	50	76	47	46	17	57	6	23	22	34	19	4	65	122	80	77	81	44	20	58	13	33	20	20	14	21
LOC100576132	263	541	564	453	684	518	561	277	276	410	533	571	498	685	443	504	631	716	529	606	490	564	600	340	566	260	157	187	240	231	608	682	2284	881	905	1118	684	839	596	176	376	188	229	318	209
LOC100576134	16	58	82	107	61	105	137	39	35	103	103	78	220	178	100	93	245	349	148	162	394	143	163	112	152	57	60	36	32	59	50	207	252	173	296	217	307	83	250	36	70	32	38	79	58
LOC100576135	32	15	20	25	76	123	14	9	27	65	71	56	199	10	13	19	179	187	123	240	69	31	43	18	79	47	48	31	70	57	90	34	126	110	154	64	50	116	29	58	152	105	110	86	48
LOC100576136	19	33	33	40	18	24	43	11	19	15	34	42	29	39	34	36	41	28	24	15	34	47	33	21	26	28	21	12	13	19	27	33	108	131	55	40	45	74	38	4	9	5	5	11	5
LOC100576140	67	189	123	113	184	111	173	118	37	154	137	243	249	215	176	199	138	141	136	143	136	228	140	110	129	98	41	55	66	60	187	159	257	228	178	250	218	230	128	33	98	33	46	79	24
LOC100576143	8	17	24	13	36	9	30	9	8	22	20	32	24	31	40	45	39	25	26	27	36	40	18	13	22	15	15	16	14	17	32	37	100	78	54	99	47	57	41	12	21	6	12	15	5
LOC100576146	13	20	34	28	13	34	34	18	9	22	33	32	31	32	29	24	33	54	32	30	34	32	19	19	38	20	15	12	14	16	12	33	77	65	27	87	43	26	38	5	24	15	14	12	11
LOC100576147	1	0	2	0	1	0	1	0	0	2	2	6	4	1	1	1	2	10	2	3	6	2	1	0	1	0	2	0	2	1	0	2	7	6	5	1	3	0	5	3	0	1	1	0	0
LOC100576150	0	0	0	0	0	0	0	0	0	0	0	0	0	0	0	0	0	0	0	0	0	0	0	0	0	0	0	0	0	0	0	0	0	0	0	0	0	0	0	0	0	0	0	0	0
LOC100576151	19	81	37	36	65	44	48	51	26	57	59	78	82	92	66	70	101	84	76	86	58	81	73	54	74	34	23	24	37	29	116	111	167	111	90	120	97	106	61	18	63	28	35	38	27
LOC100576152	2	8	13	15	5	24	11	0	5	4	22	8	6	13	6	1	16	2	17	20	24	10	11	16	23	5	6	4	10	5	2	18	18	1	15	14	16	6	4	4	9	4	4	8	11
LOC100576153	5	16	3	16	11	9	8	9	7	8	11	16	24	26	15	13	14	12	8	16	7	13	11	6	1	8	4	7	5	3	13	17	21	13	11	20	13	19	9	8	11	8	8	9	3
LOC100576155	156	449	302	244	437	291	279	314	198	332	377	607	492	297	535	552	400	232	408	339	295	331	426	235	222	224	120	129	186	101	410	445	662	561	514	520	383	656	432	115	321	129	142	194	69
LOC100576157	47	114	136	162	145	102	143	81	48	98	115	160	221	157	218	190	138	129	126	114	183	167	156	166	99	45	29	37	59	46	153	243	246	194	159	176	169	147	113	43	54	29	59	62	51
LOC100576159	12	23	35	15	25	29	51	33	9	22	19	20	41	36	53	51	39	34	74	46	31	21	25	15	51	23	14	7	43	18	86	80	126	96	55	127	72	86	21	15	21	28	31	34	13
LOC100576162	37	102	145	131	105	160	129	38	89	130	196	234	276	238	150	137	295	309	300	276	288	198	183	92	286	130	144	98	148	162	58	327	418	509	396	467	309	189	287	119	204	160	224	152	126
LOC100576163	21	77	93	87	41	37	78	87	13	58	88	140	84	87	79	88	72	85	62	60	75	81	61	65	68	32	12	23	28	18	148	82	238	115	115	145	132	160	79	6	54	5	21	39	28
LOC100576165	49	121	84	58	170	110	97	86	52	83	91	141	118	103	122	125	108	102	99	95	82	133	80	84	93	44	24	29	39	44	148	118	216	159	139	194	128	138	103	26	71	37	43	53	30
LOC100576167	3	4	5	6	8	6	4	6	3	4	6	12	15	5	9	8	8	11	2	1	9	8	5	3	2	7	1	2	1	6	3	1	30	21	12	2	4	13	7	0	5	2	2	5	2
LOC100576169	89	136	361	141	135	196	145	67	133	333	500	276	290	206	143	127	451	488	615	655	416	200	169	77	908	164	693	428	554	438	173	315	791	1248	715	578	229	348	354	528	634	480	701	969	685
LOC100576170	0	0	0	0	1	0	1	0	0	0	2	0	0	0	0	0	0	0	0	0	0	0	0	0	0	0	0	0	0	0	0	0	0	0	0	0	0	0	0	0	0	0	0	0	0
LOC100576172	4	3	5	1	5	10	7	3	3	4	4	2	9	5	8	6	12	9	6	6	7	1	8	1	2	3	0	2	2	5	6	11	5	17	4	18	9	11	6	0	1	4	6	5	0
LOC100576174	19	59	50	42	71	36	44	20	28	52	46	88	52	63	61	59	51	48	48	40	53	79	45	39	40	31	11	11	19	21	31	66	103	62	62	77	41	41	51	7	37	22	9	22	10
LOC100576176	23	72	72	75	93	89	77	40	36	78	102	86	95	97	90	77	109	121	107	74	80	126	82	58	104	52	38	45	60	49	64	85	228	163	136	178	125	105	103	43	67	46	49	46	36
LOC100576179	0	1	0	0	0	0	0	0	0	0	2	0	0	0	0	0	2	1	0	0	1	1	0	0	0	0	0	0	2	1	0	0	4	3	0	0	0	0	0	0	1	0	0	0	0
LOC100576182	2	1	5	4	4	1	0	1	0	3	3	0	3	1	4	3	1	12	0	4	6	0	1	1	3	2	1	0	0	0	1	5	14	2	7	2	1	3	3	0	4	0	1	4	1
LOC100576184	4	7	2	11	11	8	9	5	3	2	8	5	7	22	4	3	4	5	12	6	5	5	3	0	2	0	1	1	0	5	4	3	10	6	1	8	6	3	3	0	0	0	1	2	0
LOC100576185	19	20	54	24	39	42	30	28	14	25	43	37	54	40	35	28	57	54	35	59	39	44	34	8	49	18	18	21	33	14	55	73	104	90	82	135	61	56	44	19	43	27	36	39	20
LOC100576186	3	4	4	2	4	5	5	8	3	2	2	6	5	7	11	11	1	4	11	6	5	6	2	1	7	3	4	1	2	0	5	10	7	4	4	15	5	4	6	0	11	3	2	1	1
LOC100576187	83	145	227	192	269	237	219	77	95	210	311	290	343	283	227	191	340	372	330	344	311	266	266	191	229	126	93	74	136	115	161	373	597	527	424	528	335	310	271	75	179	128	168	159	104
LOC100576192	0	0	0	2	0	0	0	0	1	0	0	0	0	3	2	1	1	0	0	1	0	0	1	3	0	0	0	0	1	0	0	0	2	4	3	0	1	1	3	1	1	2	0	0	1
LOC100576193	3	4	5	6	3	1	1	2	0	2	2	0	3	3	3	0	2	2	0	4	4	6	3	2	2	1	0	3	3	2	1	0	9	5	5	7	3	6	0	3	1	2	1	4	1
LOC100576194	2	2	1	3	4	1	2	0	1	3	6	3	7	5	2	0	11	2	8	2	5	4	8	4	10	2	4	2	4	9	0	4	5	7	10	10	5	1	7	9	3	8	7	2	3
LOC100576195	441	1312	698	833	1288	965	1511	1092	684	1113	1071	1873	1953	1967	1428	1977	1094	756	995	705	733	2481	1669	1191	620	293	112	166	238	198	1972	939	1366	913	916	1204	1281	1139	745	95	335	129	170	184	129
LOC100576196	59	72	233	135	177	130	130	55	121	118	260	71	305	151	88	55	348	419	172	338	319	148	140	78	283	97	128	85	146	175	143	285	659	332	388	488	300	253	198	168	87	167	269	151	156
LOC100576198	1	13	9	5	5	9	14	2	0	3	20	7	11	6	3	5	8	17	4	7	7	5	4	7	6	4	1	2	4	3	9	8	49	8	6	25	25	12	6	3	10	4	2	3	2
LOC100576212	1	1	2	0	0	0	0	0	0	0	0	0	2	5	0	1	2	0	2	0	0	2	1	0	1	2	1	0	3	0	1	0	2	1	2	1	2	0	1	2	6	1	4	4	0
LOC100576215	1	1	5	0	2	1	1	0	0	7	4	1	2	1	0	1	6	4	2	1	1	1	3	2	2	3	0	0	2	0	2	6	4	5	0	2	0	3	2	0	1	1	0	0	1
LOC100576216	27	65	81	51	62	62	57	43	32	60	86	67	87	99	72	62	114	102	97	100	120	100	80	46	90	48	39	39	54	52	81	111	198	144	134	176	138	92	85	34	52	28	51	53	36
LOC100576217	0	0	4	3	4	3	7	1	3	4	0	4	6	5	3	3	2	4	6	7	3	1	3	0	3	1	0	1	1	1	9	4	15	7	3	11	1	5	4	0	0	0	1	0	1
LOC100576220	0	1	0	2	0	0	0	0	0	3	1	0	0	0	0	0	0	0	0	0	0	0	0	2	1	0	0	0	0	0	0	1	0	0	0	1	0	0	1	0	0	0	0	0	0
LOC100576221	22	77	81	82	112	72	111	74	29	98	134	97	121	122	90	103	117	120	113	130	98	112	110	80	108	51	25	29	64	41	88	142	251	188	142	171	132	137	124	30	68	52	48	49	21
LOC100576222	15	37	27	51	34	28	43	11	13	35	92	48	64	35	32	24	116	79	67	75	70	41	42	29	73	42	26	26	25	38	18	57	128	106	63	89	70	57	75	30	30	13	22	49	37
LOC100576223	8	13	8	9	19	16	21	9	13	12	17	19	24	18	9	11	15	29	23	19	13	9	18	5	23	15	9	14	29	24	19	19	41	38	20	29	18	17	20	28	28	53	64	39	17
LOC100576224	6	5	7	2	1	3	4	1	0	10	13	1	3	9	0	0	13	0	0	2	1	1	1	1	3	0	1	1	2	2	3	3	4	2	0	3	0	2	8	0	2	0	1	1	0
LOC100576225	0	0	2	3	2	1	2	2	1	2	5	2	1	2	3	1	5	0	5	3	6	8	2	0	2	1	2	2	1	2	0	4	4	4	6	5	4	1	5	2	1	2	6	5	3
LOC100576226	83	122	123	92	224	145	207	194	117	125	146	226	291	238	255	279	126	121	160	160	131	146	95	122	130	61	29	35	68	34	380	210	243	220	163	318	275	327	106	22	60	29	57	64	26
LOC100576227	24	62	75	97	50	144	146	77	33	73	104	123	171	237	160	188	154	162	198	191	194	125	168	70	131	56	63	32	63	56	190	320	388	324	245	351	292	178	237	39	73	44	69	85	36
LOC100576231	0	0	0	0	0	0	0	1	0	0	0	0	0	0	0	0	0	0	1	0	0	0	0	0	0	0	0	0	0	0	0	0	0	0	0	0	0	0	0	0	0	0	0	1	0
LOC100576233	3	14	8	5	7	8	7	11	2	3	1	7	7	1	8	6	11	3	3	4	2	6	0	5	5	10	2	1	1	6	12	5	12	18	7	16	6	16	12	1	5	4	7	3	4
LOC100576236	61	179	216	177	121	101	136	100	64	146	225	255	147	156	158	147	214	156	110	95	130	144	127	119	122	77	40	28	46	34	114	117	273	175	92	251	297	214	232	30	44	42	44	40	21
LOC100576242	9	67	56	32	59	62	60	65	25	36	54	61	75	125	92	106	93	95	117	115	90	68	80	51	85	48	35	27	27	38	177	147	276	136	155	226	148	135	104	22	47	10	26	52	25
LOC100576246	1	0	0	1	0	3	0	1	0	1	0	0	0	1	0	0	1	0	0	1	0	0	3	0	2	2	2	1	0	3	3	1	2	1	1	7	3	0	0	1	5	0	1	4	0
LOC100576247	39	62	146	123	85	43	47	11	74	83	140	29	174	174	115	59	145	242	126	231	393	179	97	79	192	49	82	87	67	129	16	228	459	276	315	331	172	34	245	81	49	56	99	129	118
LOC100576248	0	0	2	2	0	1	0	0	1	1	0	2	3	1	2	1	5	3	3	1	1	1	3	1	1	0	0	0	1	0	7	2	7	4	1	3	2	1	3	0	1	0	3	1	2
LOC100576249	33	47	63	46	48	48	41	41	35	42	52	42	83	105	72	63	95	83	88	81	105	71	82	50	78	42	20	35	26	48	65	137	176	136	134	140	125	83	124	27	33	40	47	42	28
LOC100576251	43	97	336	226	146	206	158	55	121	121	276	110	455	309	243	182	422	643	442	623	596	196	225	107	551	130	216	152	153	236	138	569	1556	833	946	934	494	232	459	127	131	136	205	374	246
LOC100576253	1	0	0	0	0	0	0	0	0	0	0	0	0	0	0	0	0	0	0	0	0	1	0	0	0	0	0	0	0	0	0	0	0	0	2	0	0	0	1	0	0	1	0	0	1
LOC100576258	90	102	170	150	182	111	115	69	89	101	129	204	156	127	89	101	175	119	130	135	131	136	116	89	248	94	112	115	143	90	158	122	368	255	283	191	137	352	107	68	145	98	97	184	107
LOC100576260	1	1	1	3	0	7	0	2	0	4	0	0	0	0	1	3	2	1	3	1	0	0	3	0	4	0	1	0	1	0	3	5	2	1	3	6	0	0	1	0	0	0	0	0	0
LOC100576261	23	85	78	65	94	77	101	59	13	78	98	99	119	146	117	135	115	113	140	111	113	112	128	69	113	59	38	32	38	39	138	130	217	243	153	245	177	137	125	20	55	24	30	61	32
LOC100576262	2	7	5	5	4	6	3	7	0	8	11	7	3	7	5	7	11	5	8	5	4	11	5	5	12	7	2	5	4	6	4	3	26	12	5	14	5	10	5	0	11	2	5	2	8
LOC100576263	4	8	7	6	15	4	1	2	2	19	20	4	21	11	9	3	11	21	18	16	20	13	12	3	13	4	2	4	3	6	8	11	38	15	17	13	11	4	11	3	10	8	6	4	3
LOC100576265	2	7	3	1	11	4	3	2	3	0	0	7	6	9	11	10	3	6	3	6	7	6	4	2	4	3	0	1	1	1	1	7	18	9	1	8	8	10	2	0	2	3	1	2	1
LOC100576266	69	154	138	142	181	147	182	98	62	101	197	179	174	188	157	144	204	163	218	158	166	172	170	138	154	100	72	105	98	66	148	207	367	292	180	262	228	220	160	94	121	209	260	92	60
LOC100576270	159	574	228	148	411	262	240	250	99	193	427	565	165	168	266	374	282	106	250	161	72	334	216	198	117	108	27	48	75	60	277	128	588	549	172	230	181	519	174	16	125	26	38	88	54
LOC100576271	62	294	288	379	210	259	228	183	80	143	178	329	253	612	637	515	201	237	172	157	278	229	288	305	112	35	32	31	52	26	108	580	786	321	397	581	412	171	345	21	43	29	52	50	33
LOC100576272	17	77	63	52	94	66	84	76	28	52	66	93	142	121	116	139	120	80	97	87	82	89	79	54	69	47	32	31	36	33	102	121	183	135	112	170	151	129	88	25	60	25	25	46	19
LOC100576273	0	0	1	0	0	2	1	0	0	0	2	2	4	2	0	0	0	0	0	0	2	0	2	1	0	0	0	1	3	0	1	4	5	1	0	2	0	2	0	0	4	0	0	2	0
LOC100576274	11	34	19	12	43	13	33	16	15	26	31	43	35	34	41	41	39	20	35	32	16	41	34	20	28	18	7	11	17	12	20	33	68	60	55	47	42	37	36	10	18	11	16	7	12
LOC100576279	90	62	110	116	91	105	70	61	49	98	135	44	187	70	96	82	149	51	53	126	151	143	100	116	52	34	22	29	59	42	121	91	292	141	112	100	130	121	101	11	65	11	24	42	34
LOC100576282	0	0	0	1	0	0	0	0	0	0	0	0	0	0	0	0	0	0	1	0	0	0	0	0	2	1	2	0	0	1	0	1	0	0	0	1	0	0	0	0	1	1	3	3	0
LOC100576284	0	0	0	1	0	0	0	0	0	0	0	0	2	0	0	0	0	1	0	0	1	0	0	0	1	0	0	0	0	0	0	0	0	0	0	1	0	1	0	1	2	0	0	0	0
LOC100576286	80	238	143	115	271	182	235	197	93	155	165	248	260	236	200	289	170	138	149	152	149	233	189	115	161	89	67	65	119	69	343	192	438	293	227	308	285	270	157	62	148	54	95	96	55
LOC100576288	18	58	34	40	32	49	32	33	8	16	28	29	56	35	24	25	17	36	26	53	39	45	34	27	28	8	11	13	12	14	36	19	114	47	55	70	38	66	39	3	18	12	6	14	7
LOC100576289	57	335	138	135	263	140	212	197	34	175	165	349	290	233	206	266	139	87	117	107	83	292	185	107	90	49	20	37	34	30	190	138	244	151	154	195	155	132	114	18	73	25	22	40	22
LOC100576290	5	9	4	10	3	16	4	1	2	3	7	15	6	4	0	1	9	4	9	6	9	5	8	6	3	2	4	1	5	4	6	10	27	22	17	11	11	10	2	2	2	3	3	4	1
LOC100576291	14	8	23	14	31	17	8	2	15	15	19	6	43	17	8	5	41	43	29	55	44	23	16	6	43	7	10	9	14	10	6	46	137	66	42	76	25	19	24	12	17	24	20	23	14
LOC100576293	13	18	38	54	26	78	46	13	30	48	95	42	146	72	51	44	118	199	89	172	210	54	70	28	157	55	77	85	102	52	19	167	200	122	145	157	113	37	93	127	51	135	206	65	55
LOC100576296	165	507	357	463	572	566	587	369	107	572	649	812	879	805	653	733	911	670	655	676	585	835	740	543	553	334	154	207	272	208	532	664	1333	1000	825	817	892	669	632	145	473	172	253	282	122
LOC100576298	34	185	85	101	131	118	166	76	38	116	131	192	197	247	202	210	139	107	131	133	114	186	176	110	93	68	36	31	53	41	132	164	249	196	193	221	163	179	127	15	83	32	48	62	26
LOC100576300	75	153	123	96	141	185	224	179	124	110	152	211	265	286	189	223	322	258	249	199	264	147	194	119	171	93	48	63	73	50	353	334	553	324	305	421	462	388	210	54	87	29	55	89	47
LOC100576304	2	47	33	26	51	32	78	23	6	37	37	58	31	25	27	59	42	30	16	39	22	83	39	28	33	22	13	12	13	22	79	28	131	37	28	67	42	36	30	14	21	16	21	22	26
LOC100576307	118	108	102	120	117	151	94	68	74	98	171	128	144	115	109	120	225	126	136	126	161	168	128	125	230	181	87	97	133	143	165	100	272	192	202	120	157	392	126	49	143	75	68	137	136
LOC100576320	1	0	0	3	3	6	0	1	3	0	3	5	3	6	2	1	3	1	1	2	0	0	2	3	3	2	3	1	1	0	1	1	3	2	0	9	0	2	0	2	0	3	0	2	1
LOC100576321	27	45	87	67	87	74	72	64	41	49	135	91	127	111	56	60	139	208	164	203	222	92	95	33	176	61	68	63	71	91	129	203	349	285	235	273	208	119	189	84	59	97	168	77	81
LOC100576326	5976	6629	12130	3889	10971	3130	9675	4936	7546	6469	14385	12470	6255	4667	4918	5968	9269	5599	16559	10641	5036	6002	6607	4861	9092	7841	4153	4448	7859	5066	10368	4650	17272	22257	9782	8611	6450	15914	5074	2932	10657	4296	5010	6511	5327
LOC100576330	55	127	106	100	84	67	58	39	11	136	139	260	147	44	42	68	310	166	80	64	77	117	121	41	102	90	29	36	33	38	52	58	222	234	91	114	150	257	107	32	38	22	26	37	31
LOC100576333	31	70	82	45	70	71	83	33	36	59	105	96	88	81	54	40	114	98	95	63	70	84	75	63	91	39	21	29	29	32	31	101	160	139	78	131	95	78	69	45	47	33	38	30	34
LOC100576336	39	75	77	58	70	78	58	50	36	62	48	95	74	73	68	56	102	68	67	61	52	65	58	51	75	31	19	33	52	25	69	75	259	152	120	106	90	177	51	19	45	20	28	49	20
LOC100576337	18	96	75	86	85	85	98	57	44	68	106	122	144	128	107	128	80	69	61	106	94	163	147	103	69	46	28	36	38	25	112	119	187	145	127	150	110	87	65	16	87	22	41	60	25
LOC100576346	60	235	274	219	408	263	451	334	76	219	275	396	537	498	523	561	502	507	533	448	359	300	386	129	439	172	125	108	206	167	557	672	1281	868	713	1339	701	524	501	114	254	123	177	212	108
LOC100576348	51	187	106	86	198	112	144	114	76	150	134	295	196	214	220	253	194	127	182	118	102	228	161	115	121	78	48	32	53	53	197	142	318	231	181	233	209	245	162	39	84	35	53	68	28
LOC100576349	2	10	11	9	8	2	6	5	2	1	3	10	10	12	10	7	6	0	9	10	3	8	14	3	3	0	2	0	4	2	7	7	12	4	8	8	5	10	9	3	2	3	2	1	1
LOC100576355	52	120	134	210	154	197	158	89	85	145	203	67	450	197	180	156	184	294	153	201	647	186	229	146	155	70	70	44	56	132	166	164	440	225	211	320	366	159	175	43	55	27	67	73	73
LOC100576359	42	161	107	93	142	139	153	101	43	127	147	167	188	200	159	194	168	162	125	156	174	146	136	93	134	72	45	78	84	55	166	215	302	263	210	233	249	185	151	34	101	41	61	75	46
LOC100576361	3	17	3	8	5	8	5	3	2	5	3	10	1	2	2	2	2	1	4	2	6	4	7	2	1	2	0	0	2	2	2	7	6	4	3	2	15	6	4	0	1	0	0	1	0
LOC100576366	59	198	147	129	219	174	226	176	80	177	163	263	276	322	243	306	198	146	163	164	135	279	236	145	126	101	49	55	78	57	291	222	360	279	222	299	273	298	153	26	133	38	60	70	26
LOC100576369	55	81	155	151	125	132	96	23	55	159	215	155	225	148	119	96	208	232	200	220	235	161	146	49	218	61	100	88	113	124	50	185	443	286	322	330	135	81	199	94	96	96	143	158	124
LOC100576370	0	0	1	0	1	2	0	0	0	1	4	2	0	0	0	0	1	0	1	2	1	0	3	2	7	2	0	0	3	1	2	3	2	0	1	2	3	2	4	0	4	4	5	1	3
LOC100576373	78	267	172	169	315	181	222	162	88	228	196	361	316	348	309	298	308	306	254	222	212	373	257	185	300	170	96	106	166	142	270	287	580	456	407	424	343	408	266	76	252	110	99	156	101
LOC100576374	8	17	17	20	17	11	16	14	6	17	24	24	24	28	31	20	21	22	23	34	15	15	27	6	31	9	9	8	20	17	11	44	45	66	35	96	23	35	44	17	19	15	15	24	7
LOC100576378	141	313	169	133	300	117	205	133	68	183	164	433	234	230	209	268	129	119	144	86	77	397	196	147	86	51	40	26	55	53	219	166	274	203	194	249	183	263	128	35	109	33	37	60	31
LOC100576381	19	86	113	80	118	95	91	47	17	145	119	138	173	147	99	102	178	223	136	178	173	175	137	56	141	75	67	51	100	65	111	227	366	299	309	426	228	146	191	66	99	68	52	93	42
LOC100576382	0	5	6	1	1	1	5	2	0	1	3	5	2	2	0	1	2	0	1	2	6	1	7	4	1	3	0	1	3	0	10	2	7	2	3	3	6	1	2	0	0	1	0	0	2
LOC100576383	90	74	224	149	104	155	142	43	114	130	235	99	221	171	155	128	248	304	237	238	330	162	198	96	319	92	77	96	122	225	95	340	587	566	417	421	303	210	293	70	71	56	93	157	185
LOC100576384	69	54	221	176	169	130	76	26	65	159	364	116	384	173	99	61	456	601	373	776	663	203	121	57	348	85	196	190	294	279	69	333	659	636	634	488	255	101	389	363	201	467	568	224	314
LOC100576387	0	0	0	0	0	0	3	1	0	0	0	0	2	0	1	2	0	0	0	0	3	0	0	0	0	0	0	0	0	0	0	1	3	0	2	0	1	1	1	0	0	1	0	2	0
LOC100576392	9	2	52	26	9	7	14	4	14	9	18	14	36	17	9	7	26	40	43	46	46	18	10	4	39	16	18	17	42	20	5	28	71	47	57	53	24	23	38	19	15	50	63	37	29
LOC100576400	46	112	68	87	123	78	111	107	31	99	92	158	104	149	131	168	88	78	89	108	63	140	121	98	118	86	31	58	98	36	243	106	173	127	131	163	125	225	83	44	78	85	67	58	52
LOC100576401	163	343	268	213	316	199	284	293	256	232	280	473	278	265	332	400	307	229	299	220	178	384	341	265	294	189	113	108	181	124	436	230	692	441	421	442	293	561	232	68	212	91	100	176	118
LOC100576402	18	32	63	42	73	59	65	38	26	60	65	79	151	95	74	65	137	164	152	167	179	73	128	42	155	54	63	69	93	75	78	179	353	416	278	317	153	95	152	52	128	103	104	96	51
LOC100576404	151	242	385	353	280	273	290	77	174	280	544	286	480	476	256	200	600	654	558	519	609	400	356	253	499	201	172	188	247	229	173	559	1130	879	581	868	642	300	587	225	232	209	271	279	206
LOC100576405	36	67	131	91	91	90	67	36	46	99	148	93	147	133	102	85	145	241	188	231	238	132	102	59	199	70	77	52	117	115	70	171	425	341	265	326	150	102	188	100	80	103	119	155	104
LOC100576410	1	2	3	0	0	2	1	1	0	1	1	2	0	2	2	1	2	0	0	2	0	1	1	0	0	2	0	0	1	1	3	3	2	2	1	0	5	2	3	1	0	1	4	1	1
LOC100576411	14	37	38	37	30	40	42	18	14	40	62	50	65	57	45	42	90	85	90	82	61	41	59	37	58	22	19	22	34	37	67	95	156	118	99	137	101	52	59	16	33	18	25	29	11
LOC100576412	24	49	52	49	94	98	126	88	52	68	78	94	125	117	113	155	83	58	111	99	60	76	96	64	64	42	26	24	40	40	173	84	192	132	116	137	108	163	63	22	52	17	32	39	22
LOC100576413	109	392	448	345	567	498	716	635	189	210	357	453	830	692	730	780	919	793	1003	856	577	385	507	207	858	356	220	188	282	351	1510	1450	2771	1524	1516	2020	1320	1505	686	182	347	270	371	524	232
LOC100576414	1834	2374	1380	1634	2690	3183	1001	1392	652	1100	4178	3223	1526	1731	2366	1964	5348	1900	3134	3296	1567	2097	1275	899	3112	1326	855	1298	2892	1071	2488	1522	6880	6070	3591	3213	3517	3433	2945	769	4646	1280	2234	985	1053
LOC100576418	811	936	2839	2129	1342	278	1509	551	790	1947	3902	886	2833	2156	2111	1428	3080	2529	3858	1576	4485	2073	2454	1858	707	349	258	212	481	395	749	4729	2207	2037	2180	3950	3377	631	3132	609	225	480	720	108	214
LOC100576421	83	101	215	212	169	331	161	44	170	248	398	257	429	237	188	134	469	675	365	558	633	370	322	140	546	127	241	164	237	288	102	395	698	611	575	519	412	199	348	264	217	438	413	312	247
LOC100576422	93	227	196	200	268	281	432	253	242	265	319	368	610	449	340	454	548	436	449	389	444	423	432	215	303	144	91	121	165	130	675	518	908	554	506	530	665	558	384	94	237	107	145	165	84
LOC100576425	30	84	87	110	90	66	110	83	35	67	105	104	128	117	80	120	154	85	170	112	155	87	90	70	92	68	58	40	76	46	110	98	269	178	159	134	122	107	95	47	78	56	86	90	45
LOC100576428	1	1	11	1	4	3	1	3	5	2	1	0	5	4	1	0	8	9	4	5	6	3	3	0	8	3	0	1	1	1	7	10	15	6	4	6	6	6	1	3	0	3	0	2	5
LOC100576432	9	21	19	19	26	16	31	23	24	24	40	36	46	40	37	30	57	61	40	54	48	30	25	20	58	25	11	18	30	28	30	64	104	119	77	104	58	71	48	19	38	24	21	49	15
LOC100576433	11	60	54	65	69	47	53	34	32	62	89	71	93	96	67	57	93	82	84	82	67	50	84	38	57	40	19	35	44	26	43	82	160	139	108	164	87	86	66	33	59	36	55	41	30
LOC100576434	2	3	5	0	3	0	5	2	1	2	2	0	4	1	3	0	2	3	2	7	8	5	3	2	2	2	2	0	1	2	3	2	8	4	5	10	2	6	0	2	2	6	1	4	1
LOC100576435	66	92	155	113	154	155	116	44	49	131	191	93	214	174	111	104	249	257	207	203	224	152	165	76	237	110	135	127	159	137	144	185	393	228	282	277	272	167	160	128	165	206	201	153	144
LOC100576436	89	252	203	197	355	227	258	211	122	217	225	374	353	388	384	422	338	267	288	277	200	306	258	134	263	158	79	71	122	164	358	397	762	471	401	602	358	467	280	62	156	75	99	154	80
LOC100576438	38	121	104	124	153	128	65	35	47	151	180	146	166	155	130	97	226	229	178	160	181	153	178	93	140	70	63	65	87	73	40	127	267	267	219	222	161	103	164	74	119	80	132	80	57
LOC100576439	16	69	47	49	98	82	127	138	17	47	61	125	144	178	142	158	126	43	134	83	49	98	112	58	99	27	21	31	28	27	162	132	236	188	114	157	149	128	76	11	40	14	31	33	18
LOC100576444	85	843	240	108	121	22	28	120	42	473	187	1049	45	227	153	155	51	187	96	35	76	30	171	165	54	38	7	22	23	21	50	210	178	163	184	375	327	208	437	9	146	29	26	52	13
LOC100576446	56	104	92	151	212	186	66	50	57	96	206	166	250	107	70	82	104	194	135	208	148	230	139	85	135	108	130	91	140	146	95	82	589	271	366	171	126	217	92	87	188	83	127	132	197
LOC100576447	4	2	8	5	2	2	7	4	0	2	5	4	4	2	3	3	3	5	8	7	5	4	3	2	9	3	4	5	10	4	8	2	19	12	2	1	2	7	0	8	14	13	14	11	5
LOC100576449	7	14	31	32	23	21	25	6	15	17	41	23	45	41	17	15	27	51	45	59	51	21	17	7	31	12	15	19	26	30	12	60	88	51	60	56	33	11	41	20	24	32	36	42	20
LOC100576453	0	6	6	1	4	4	9	4	2	2	1	8	2	10	5	5	2	4	1	0	5	5	5	7	3	3	1	2	0	2	8	2	7	2	8	6	2	6	3	2	1	0	1	1	0
LOC100576454	22	27	46	70	38	27	65	13	34	25	61	23	58	57	79	66	83	103	65	79	107	48	37	26	83	25	26	32	25	31	30	107	210	147	123	176	107	54	84	14	32	20	40	45	36
LOC100576457	110	237	135	217	392	310	402	320	87	250	222	344	499	433	307	426	210	150	235	181	140	430	292	235	139	83	38	61	73	53	356	180	364	237	261	300	302	366	135	41	101	65	98	76	45
LOC100576458	120	246	98	135	190	42	30	87	72	174	243	413	153	181	187	167	254	205	113	44	75	344	237	181	168	158	35	39	18	54	154	232	552	240	255	388	327	373	279	8	127	4	9	94	31
LOC100576460	1	0	2	0	4	6	9	2	2	0	2	0	3	5	0	0	0	0	0	1	1	2	2	1	0	1	0	1	1	0	2	0	5	0	2	1	0	0	1	0	4	0	0	1	0
LOC100576461	16	50	73	84	98	60	46	27	34	63	95	70	102	83	60	43	89	108	100	82	96	73	97	30	90	19	24	25	34	40	37	88	257	153	118	183	81	44	86	23	37	40	37	43	24
LOC100576462	10	38	10	17	26	19	24	34	13	12	7	22	14	50	24	27	21	9	14	2	1	52	19	7	10	19	0	9	5	17	27	20	56	20	29	35	15	20	38	8	17	9	5	12	4
LOC100576467	138	310	245	210	236	316	345	233	106	167	226	395	269	351	301	408	322	232	302	214	250	294	271	273	218	157	76	104	105	113	429	349	743	402	310	456	509	359	326	39	163	80	123	137	64
LOC100576471	10	6	29	15	38	24	19	6	20	17	30	9	35	29	19	10	26	28	27	23	35	15	22	7	37	4	1	5	6	16	16	17	72	51	39	55	34	21	22	3	13	4	7	19	7
LOC100576472	112	246	275	295	317	313	291	119	143	339	459	519	498	538	358	342	778	727	552	691	612	507	391	183	584	272	228	253	359	329	170	594	1249	1297	929	813	651	376	596	247	317	259	341	319	283
LOC100576473	0	0	0	0	0	0	0	0	0	0	0	0	0	0	0	0	0	0	0	0	0	0	0	0	0	0	0	0	0	0	0	0	0	0	0	0	0	0	1	0	0	0	0	0	0
LOC100576476	5	3	3	6	6	7	3	2	1	8	9	2	7	4	2	4	10	5	6	7	3	7	2	7	8	9	9	15	16	6	5	2	7	7	7	7	4	9	7	8	14	16	19	14	13
LOC100576482	25	104	60	48	107	78	123	94	27	70	68	79	127	128	126	134	123	97	157	106	74	85	93	24	123	59	34	27	47	36	171	131	285	156	193	248	158	189	137	33	68	50	32	74	35
LOC100576484	1187	2109	2056	1644	1398	1121	1788	1303	827	1204	1409	3830	1646	1893	1845	1876	2211	1928	1392	1627	1718	2426	1784	1991	2048	1061	487	425	795	767	1876	1864	5041	4146	1817	3617	3169	2539	1957	356	1063	201	354	1326	774
LOC100576487	34	122	72	70	130	51	95	76	38	63	73	136	86	116	95	112	56	47	57	41	34	139	87	74	44	36	13	14	19	11	73	66	112	80	76	97	83	86	49	11	23	10	10	29	16
LOC100576488	0	1	1	1	2	3	4	4	2	2	2	6	0	3	3	4	0	3	3	2	2	1	4	1	2	2	0	1	1	2	4	1	12	8	0	9	4	2	3	1	2	1	0	1	2
LOC100576492	17	73	39	30	52	18	59	33	34	33	55	82	54	67	55	75	27	41	42	32	31	69	35	32	38	25	10	17	6	18	76	43	70	56	61	60	89	61	37	5	24	8	8	24	13
LOC100576497	62	104	222	49	86	88	73	59	88	74	87	104	57	53	49	57	68	57	138	126	54	54	58	41	140	86	52	35	78	76	99	55	159	181	92	69	79	115	86	31	103	47	50	143	35
LOC100576498	0	1	1	1	3	2	0	1	1	1	5	3	2	8	0	0	1	0	3	4	0	0	1	1	3	1	0	1	2	0	0	3	8	5	6	2	4	0	2	0	1	0	3	2	0
LOC100576502	13	122	61	74	117	71	97	55	16	68	87	126	112	140	152	146	103	100	78	103	79	111	102	63	66	30	7	18	12	33	72	114	212	181	131	152	91	92	71	10	56	6	9	35	21
LOC100576504	10	37	76	43	56	32	47	26	21	41	56	66	123	70	72	66	84	97	70	87	153	72	72	50	69	30	25	15	41	29	58	162	192	130	104	245	127	54	101	23	31	26	33	68	40
LOC100576505	14	18	11	16	6	7	31	7	5	4	23	16	11	14	23	26	7	11	5	17	6	31	15	16	24	7	8	6	14	14	25	13	57	36	17	16	23	20	9	4	15	1	3	20	5
LOC100576506	100	569	236	231	453	222	317	270	82	315	311	535	338	410	381	409	222	170	202	168	123	584	366	342	213	148	85	80	131	101	255	251	473	323	377	428	287	338	194	62	195	63	74	118	82
LOC100576508	2	9	3	0	0	6	1	3	0	3	3	5	0	12	3	5	5	1	2	6	12	6	7	3	1	1	0	0	0	3	4	6	13	6	1	4	3	3	12	1	0	0	1	0	1
LOC100576512	5	7	21	19	41	17	8	4	12	25	19	18	25	24	21	13	17	35	27	29	21	30	18	10	38	6	2	7	12	12	7	21	62	35	21	26	28	8	25	6	8	10	16	8	6
LOC100576514	59	217	136	227	289	233	341	242	89	311	219	381	502	562	399	484	385	226	296	232	258	477	360	279	182	116	61	66	94	85	312	428	600	453	406	474	487	359	286	34	133	47	66	96	49
LOC100576515	44	203	130	110	195	94	151	113	29	113	127	205	176	152	163	198	161	125	147	106	83	143	136	122	120	89	57	48	80	48	166	200	334	252	181	254	185	214	150	42	121	63	60	105	52
LOC100576519	128	218	257	252	262	296	250	110	112	222	330	329	308	289	219	218	333	333	288	271	299	257	265	188	300	164	100	97	167	127	216	251	608	484	395	488	453	380	285	80	174	72	100	144	99
LOC100576522	60	42	64	34	43	41	52	29	31	31	51	76	52	44	39	57	60	68	54	69	57	57	59	44	89	41	31	18	35	39	70	49	221	175	75	113	67	140	30	22	53	16	38	29	31
LOC100576527	22	68	83	80	70	86	102	52	22	64	87	90	128	144	145	112	125	131	133	145	140	145	108	61	112	50	26	31	82	55	117	171	293	250	209	267	190	111	158	15	99	39	52	61	42
LOC100576528	76	154	260	163	165	209	125	70	83	193	247	158	232	256	166	139	322	357	250	234	355	200	188	99	155	81	70	69	88	141	63	294	589	441	330	372	237	142	278	53	94	70	72	147	137
LOC100576529	0	0	1	0	0	0	0	0	0	0	1	2	1	0	1	0	1	0	0	0	0	0	0	0	1	0	0	0	0	0	0	0	0	1	0	0	0	0	0	0	4	0	1	0	2
LOC100576530	166	531	264	218	415	234	417	350	223	306	238	526	375	411	386	450	257	199	263	193	223	447	293	315	194	141	56	74	118	66	500	288	518	326	310	464	330	456	253	66	105	56	60	98	55
LOC100576531	42	102	65	55	102	56	99	62	49	88	89	130	79	97	105	130	51	58	76	66	45	120	94	69	42	33	18	17	31	22	147	86	155	73	48	121	80	105	50	17	47	15	21	28	12
LOC100576532	8	30	32	29	36	26	43	28	11	25	21	43	48	36	53	53	22	25	40	31	23	42	36	23	35	22	4	15	25	8	60	43	74	41	49	75	46	57	24	9	15	16	17	22	7
LOC100576534	6	3	6	4	8	8	5	4	3	6	5	4	10	7	6	6	6	5	10	7	16	5	7	2	2	2	1	3	0	2	5	15	10	12	6	10	9	4	4	0	1	1	7	3	2
LOC100576540	0	0	0	2	6	0	1	0	2	1	1	0	0	1	0	0	2	1	1	0	1	0	3	0	0	1	0	2	2	0	1	0	5	0	4	0	0	2	0	0	2	3	1	1	0
LOC100576542	104	316	134	170	232	168	202	192	79	228	159	338	250	290	214	294	166	117	156	111	129	337	242	184	139	69	47	43	38	45	232	166	357	204	164	210	209	226	126	23	66	29	43	51	32
LOC100576543	48	124	98	98	116	106	120	67	51	88	114	192	141	171	130	145	179	117	124	135	88	144	122	109	145	80	33	49	69	52	108	138	309	237	174	230	167	195	142	26	114	45	54	83	50
LOC100576544	70	150	159	160	177	176	277	175	99	127	230	241	362	330	262	323	353	260	340	297	279	212	238	163	231	149	78	88	127	107	454	373	736	478	393	502	463	476	278	62	152	77	89	127	69
LOC100576547	58	90	131	118	144	107	68	41	53	100	208	144	165	113	94	80	152	170	106	162	144	117	136	118	108	84	50	36	50	48	55	120	226	177	216	159	175	118	131	75	97	50	71	82	48
LOC100576552	102	220	270	136	140	258	161	102	292	156	276	251	142	183	163	157	227	233	159	208	217	228	267	361	742	273	250	138	247	161	113	152	757	354	617	204	189	803	100	281	336	123	195	302	260
LOC100576554	12	51	47	24	74	25	79	46	34	32	41	58	50	74	92	88	43	49	55	55	48	60	69	23	46	26	22	14	24	39	87	109	160	88	88	163	64	58	72	18	31	10	6	36	20
LOC100576555	983	642	1578	118	1259	52	352	98	577	613	2144	1386	122	74	90	70	565	156	1528	840	324	122	283	107	1548	446	314	445	638	518	770	51	399	1299	611	150	76	756	109	139	715	157	202	576	610
LOC100576557	0	2	2	5	1	0	4	1	2	1	1	3	2	1	0	0	6	6	5	2	1	2	1	0	4	0	2	0	0	0	0	3	18	1	2	3	0	2	0	1	3	1	2	2	2
LOC100576559	87	244	170	168	263	190	196	190	92	170	196	339	174	244	177	240	188	100	128	135	95	310	197	189	132	84	39	25	66	37	236	167	275	177	177	250	203	249	110	21	103	33	44	53	36
LOC100576563	177	268	329	364	467	621	358	167	239	372	509	320	460	423	253	225	482	409	429	665	505	428	363	264	663	258	386	276	381	369	202	302	849	585	450	597	543	388	486	420	400	538	647	566	408
LOC100576565	29	76	46	64	109	71	66	53	30	74	88	145	119	113	105	99	85	67	40	89	64	145	95	68	46	39	24	21	36	22	51	79	141	104	109	104	74	83	84	13	53	17	30	39	18
LOC100576568	2	3	1	3	0	3	2	0	1	1	5	3	1	2	4	3	5	6	2	1	8	1	2	1	7	2	4	2	5	2	2	1	6	15	10	7	2	0	3	2	5	3	1	8	8
LOC100576569	2	2	1	3	2	0	2	0	0	1	0	1	3	4	0	0	8	3	1	2	6	3	2	0	1	1	0	1	0	1	1	4	11	3	2	7	5	0	3	5	1	3	8	0	1
LOC100576571	24	128	127	88	128	122	137	60	18	99	125	147	194	150	171	130	119	182	122	129	130	180	138	67	126	57	41	39	62	77	77	169	295	248	190	262	184	133	135	27	82	32	39	56	40
LOC100576572	157	358	246	250	373	250	253	245	177	335	331	534	362	489	423	405	335	281	246	244	246	531	304	225	287	159	88	96	175	93	307	279	565	385	435	520	442	454	249	71	234	82	125	104	62
LOC100576584	1	5	1	4	6	1	1	2	1	2	0	7	2	7	0	3	0	0	2	2	4	3	6	2	0	0	0	0	0	0	1	0	3	1	3	2	3	1	1	0	0	0	0	0	1
LOC100576586	112	164	316	263	288	348	262	134	86	231	360	365	486	406	295	262	609	675	566	610	630	390	345	185	542	173	160	146	232	238	349	667	1204	988	818	896	689	429	534	187	227	193	266	288	242
LOC100576590	6	10	17	5	11	7	6	11	12	22	14	25	16	30	35	36	27	13	24	24	26	31	30	6	25	10	6	7	9	29	19	39	60	25	27	73	11	11	22	10	12	5	7	23	7
LOC100576591	53	53	87	72	47	95	75	73	15	54	81	147	264	180	85	68	209	193	220	143	129	66	113	39	151	61	25	42	56	47	240	307	449	278	217	347	249	287	222	49	58	40	62	86	45
LOC100576592	162	331	281	144	487	309	321	312	180	215	293	506	368	308	268	394	364	170	514	364	188	520	689	617	1850	1201	697	543	902	963	701	202	819	825	2267	408	350	3801	257	494	1530	674	756	1457	647
LOC100576597	2	2	7	13	4	2	8	2	4	6	11	2	3	7	15	9	5	14	5	10	14	5	4	4	5	2	4	2	7	2	4	14	30	20	10	22	6	7	3	2	6	5	4	5	1
LOC100576600	32	92	97	108	98	98	90	47	50	89	118	149	141	137	117	107	147	128	124	122	139	149	124	76	93	52	49	56	71	62	68	156	282	228	206	235	196	103	158	60	119	59	88	75	45
LOC100576603	3	1	6	1	10	2	2	3	1	1	7	1	9	4	1	1	3	3	5	8	8	6	0	4	1	7	0	2	0	3	3	2	12	4	5	2	1	2	2	1	1	2	3	0	2
LOC100576606	22	52	68	60	75	86	55	39	40	58	69	83	126	97	85	74	135	120	149	156	123	104	120	58	131	49	47	42	75	69	51	136	245	229	195	216	131	81	140	44	94	60	95	76	55
LOC100576608	13	73	53	46	52	41	72	43	17	70	63	73	80	123	64	74	53	43	48	48	32	96	80	58	32	22	15	14	18	15	51	60	81	54	52	101	81	49	60	7	33	11	8	15	12
LOC100576610	64	250	126	116	262	137	212	124	47	182	144	317	239	257	274	285	204	139	207	147	133	278	206	126	139	66	38	50	70	63	188	202	379	231	245	368	266	199	155	23	80	32	45	94	33
LOC100576612	137	393	288	265	345	362	347	231	126	233	430	494	330	363	327	347	370	239	316	279	234	377	317	295	312	165	86	72	171	122	295	293	678	479	362	458	448	544	313	79	254	106	121	189	103
LOC100576614	112	172	160	142	247	121	156	140	121	93	194	203	199	176	229	271	197	169	170	182	111	243	174	143	273	148	68	58	85	78	350	190	502	535	327	375	264	674	171	39	168	32	53	111	48
LOC100576615	21	59	70	69	78	75	73	38	28	69	115	89	114	98	65	57	118	93	100	83	96	80	103	49	93	51	42	39	75	53	40	120	238	133	117	209	126	84	112	57	77	80	86	77	59
LOC100576617	8	10	14	7	14	10	12	5	1	8	25	18	7	11	5	5	12	4	3	15	12	16	10	10	6	11	3	7	7	1	27	8	12	21	22	19	12	36	9	6	10	4	22	4	11
LOC100576619	19	29	52	45	48	50	48	13	29	42	73	68	70	54	47	33	71	99	85	71	66	49	49	34	88	30	24	22	37	29	16	92	163	129	87	101	65	37	85	19	44	44	41	36	16
LOC100576620	95	270	342	277	340	317	297	181	84	255	393	372	372	383	321	300	347	365	388	316	362	370	274	220	304	188	121	113	158	158	253	357	801	543	433	570	411	313	326	103	218	126	143	226	122
LOC100576621	53	120	63	74	151	99	208	136	15	100	75	162	193	157	146	180	103	71	110	85	93	212	125	108	102	110	45	78	134	53	187	78	218	147	125	143	146	101	98	49	101	177	171	71	49
LOC100576623	2	10	10	13	9	10	14	9	3	9	7	11	16	26	12	12	20	18	6	14	7	6	10	6	13	9	4	1	5	10	12	12	32	8	23	41	45	18	18	1	14	2	2	8	4
LOC100576625	11	33	27	22	48	26	39	18	28	31	35	42	52	55	72	69	90	69	75	76	67	49	56	15	65	34	9	26	47	35	51	81	156	146	113	153	116	78	75	27	44	33	25	33	20
LOC100576637	8	2	4	10	3	1	3	1	5	4	2	2	14	0	1	2	1	10	5	4	0	1	0	1	2	1	0	3	2	0	4	3	4	0	2	10	9	2	4	2	1	1	3	10	1
LOC100576638	5	22	11	10	22	25	25	23	4	6	14	14	20	27	16	21	5	21	23	29	20	16	19	10	10	4	1	5	6	9	25	38	74	37	33	63	19	30	20	3	11	6	3	9	11
LOC100576640	316	445	769	503	162	259	248	33	735	506	704	610	391	488	327	208	469	1964	513	1326	1096	962	778	411	2640	313	668	257	540	641	115	1226	1741	2691	1581	2242	1149	389	1357	355	373	161	242	1115	756
LOC100576645	41	53	101	47	165	53	71	75	11	59	85	173	146	73	132	133	127	99	117	112	83	97	75	70	143	44	25	41	94	36	103	73	328	339	149	140	175	190	69	25	143	37	28	22	56
LOC100576646	277	913	850	1686	1093	2072	2231	612	480	2032	2390	1921	5081	4831	1819	2013	5290	5558	3230	4439	7491	4056	3415	1746	1704	451	319	337	444	593	1395	3919	5417	5173	4666	3128	5095	1834	4487	225	945	265	318	531	428
LOC100576647	71	276	178	152	298	195	192	131	92	244	236	343	260	341	303	302	302	240	235	208	208	258	202	179	182	128	58	88	95	79	223	230	495	408	298	376	331	359	183	35	155	54	47	103	62
LOC100576649	72	204	205	157	260	208	258	193	100	168	203	290	373	342	358	368	355	294	374	362	320	280	254	146	265	143	70	80	113	122	351	430	728	528	473	516	498	476	342	76	199	78	104	138	90
LOC100576660	93	184	144	164	187	215	195	110	103	174	238	281	254	249	206	245	271	236	199	248	201	249	216	151	168	103	69	50	94	65	265	214	494	289	269	356	309	279	179	59	131	66	93	97	43
LOC100576662	2	3	3	0	4	0	2	1	1	3	2	2	5	2	0	0	3	5	0	3	3	4	6	1	1	6	2	1	1	1	2	0	0	4	7	2	4	2	2	3	4	2	2	0	0
LOC100576666	8	13	18	15	18	13	9	4	6	31	19	30	30	38	24	21	43	51	33	49	26	23	22	15	31	19	22	6	21	25	11	28	68	38	64	60	33	5	43	15	13	18	20	11	20
LOC100576667	116	410	437	363	441	573	340	171	112	340	519	585	666	484	453	409	919	736	810	870	624	481	486	305	962	613	532	357	619	564	302	752	1574	1590	1081	1211	918	665	753	348	707	442	553	657	386
LOC100576669	22	138	117	90	154	75	120	73	30	109	72	155	112	173	140	157	81	64	88	98	81	169	99	79	63	36	19	31	21	32	93	120	231	103	108	196	87	91	66	9	63	21	15	45	15
LOC100576671	64	98	191	152	146	116	107	20	56	118	247	137	183	181	111	82	233	325	209	230	383	184	184	84	159	46	61	60	51	94	59	288	408	345	298	509	260	86	293	65	59	53	53	108	61
LOC100576677	13	39	29	14	30	9	20	17	8	6	20	34	15	24	20	22	20	13	20	21	11	39	17	10	22	18	5	3	5	2	25	19	42	30	23	18	24	36	19	4	20	4	3	8	6
LOC100576679	0	1	0	0	1	1	0	0	0	0	3	0	2	0	0	0	0	1	0	1	2	2	0	1	0	0	0	0	1	0	0	0	6	1	2	5	0	1	1	1	0	0	2	2	1
LOC100576683	29	51	129	92	158	160	57	17	42	97	112	65	134	106	71	49	201	163	144	197	215	76	131	34	116	24	30	27	55	49	53	210	457	218	169	199	139	73	118	40	52	57	82	41	36
LOC100576687	2	5	0	2	3	2	3	0	0	0	2	4	11	1	0	1	1	3	4	3	1	2	1	6	0	1	0	0	1	0	5	3	6	5	1	8	4	2	5	1	0	0	0	0	0
LOC100576688	1	0	3	4	0	2	1	0	2	2	0	7	0	0	2	0	6	1	4	4	2	0	2	1	1	0	0	1	4	3	1	2	3	5	2	3	1	1	2	1	1	0	1	2	1
LOC100576690	1092	1209	1809	1509	1813	2182	2244	1700	1485	1186	1877	2034	3067	2450	1908	1753	2658	2416	2926	2594	2671	1708	1984	1385	2243	1284	704	655	1053	1189	4847	3356	6734	4121	3450	3970	3378	5609	2212	678	1075	1054	1415	1549	1044
LOC100576700	58	139	147	130	147	105	240	94	108	74	114	64	114	156	119	114	125	100	198	122	127	75	120	63	117	38	29	39	54	50	226	120	359	211	155	216	172	315	123	49	52	38	78	64	46
LOC100576702	1	3	2	2	1	0	4	2	0	0	3	1	0	1	0	0	1	1	4	0	0	0	0	2	2	1	0	1	1	1	0	3	3	1	1	0	2	2	0	2	3	3	3	1	1
LOC100576703	1121	1356	2626	3569	2448	2519	2685	912	2107	1662	3122	1909	5461	3694	3597	2823	4857	6022	4357	4554	6753	3615	3046	1714	2701	932	1177	1080	1191	1845	2276	5514	9689	5789	6335	7538	5155	2696	4876	915	1130	847	1354	1743	1444
LOC100576705	3	0	1	3	3	1	4	1	0	1	0	2	6	0	0	1	0	0	3	5	2	1	6	0	1	0	0	0	1	0	7	0	9	0	6	0	5	1	3	0	2	0	1	0	1
LOC100576706	28	50	45	39	49	34	62	50	35	53	56	79	60	86	61	65	79	93	88	91	65	63	71	28	61	44	25	20	46	31	95	95	214	164	130	161	120	110	82	22	60	21	37	35	17
LOC100576708	52	141	72	76	148	119	212	111	62	97	115	177	194	213	175	222	146	106	128	127	86	200	151	90	93	79	28	30	58	38	211	174	302	210	187	293	238	233	125	21	76	26	34	63	38
LOC100576709	61	82	205	200	132	138	105	31	68	143	301	181	362	276	161	112	365	714	310	601	706	317	259	91	401	97	177	150	249	265	63	501	1031	636	824	770	339	101	516	251	164	240	267	284	295
LOC100576717	99	261	302	266	232	309	394	228	143	225	362	438	418	504	403	428	588	588	558	541	550	324	374	234	575	188	133	194	288	254	449	711	1300	1043	666	1160	836	502	631	151	281	215	321	232	174
LOC100576718	65	102	146	204	124	269	341	199	187	182	349	192	458	269	147	247	328	241	354	292	390	273	338	176	310	140	72	77	101	110	917	385	704	391	389	416	449	643	187	101	141	115	139	98	83
LOC100576722	3	17	8	15	13	14	13	12	12	17	11	11	15	18	12	15	13	15	14	14	18	16	22	8	15	9	4	1	6	8	22	28	37	14	27	26	27	13	12	10	15	6	13	12	7
LOC100576730	8	19	21	13	16	12	20	5	9	21	32	19	14	15	13	17	29	9	11	15	10	52	23	13	20	9	11	11	18	16	41	10	92	24	34	30	19	15	8	9	17	14	10	16	16
LOC100576733	25	56	57	55	58	84	60	33	18	84	70	138	89	89	63	65	130	88	117	98	64	84	75	43	76	32	40	32	64	32	38	118	220	190	124	172	172	77	75	55	70	82	113	47	34
LOC100576734	20	16	23	36	220	28	16	2	25	11	35	39	54	36	19	39	60	19	65	101	58	43	52	11	40	14	22	12	11	12	82	39	210	76	182	40	17	87	24	7	43	3	6	69	9
LOC100576735	16	103	65	69	122	85	101	76	38	88	66	160	179	142	102	126	51	47	66	52	53	167	118	82	58	17	21	12	34	24	76	71	96	77	68	106	81	104	90	16	46	31	32	22	7
LOC100576736	9	25	50	24	32	117	58	24	23	57	22	75	10	21	31	49	21	12	19	8	8	39	46	43	27	19	14	9	13	10	40	39	56	61	44	52	38	42	21	11	13	12	15	20	11
LOC100576737	4	16	8	13	5	2	7	10	1	8	5	15	9	12	18	16	9	16	18	8	20	13	11	9	9	4	4	3	6	6	10	21	34	17	17	30	28	19	16	5	10	2	2	9	4
LOC100576738	3	12	6	9	14	3	6	3	5	6	6	5	10	21	10	7	12	6	8	7	5	17	6	7	10	9	6	10	11	11	4	8	16	14	18	12	20	16	21	5	12	3	10	10	7
LOC100576740	0	0	1	0	1	0	1	0	1	0	0	0	1	1	1	0	0	0	2	1	1	0	1	0	0	2	0	1	1	0	0	0	0	1	0	1	0	0	0	0	0	1	0	0	0
LOC100576741	2	2	0	0	2	2	2	0	1	2	0	1	2	2	2	0	0	1	0	2	1	0	0	0	1	0	0	0	0	0	0	2	1	0	1	0	4	1	0	0	1	0	0	1	0
LOC100576742	351	331	622	343	320	210	416	109	427	283	590	687	370	360	351	295	537	764	414	558	396	677	840	282	1299	340	293	216	314	417	453	540	1727	1320	944	1414	560	736	557	160	379	101	189	564	394
LOC100576744	22	69	50	36	108	34	66	50	35	57	61	88	83	82	119	101	59	68	83	71	45	83	65	39	69	48	28	25	45	35	81	84	152	128	96	142	91	132	61	22	75	14	32	38	29
LOC100576745	267	355	195	238	347	322	332	145	167	299	383	338	366	310	285	462	511	366	470	341	351	459	439	289	446	214	124	148	130	199	459	145	884	614	423	458	641	551	297	94	270	38	76	176	177
LOC100576746	4	5	0	1	3	6	14	12	1	2	11	4	5	16	2	9	4	5	13	0	9	26	2	1	4	5	1	2	1	3	10	2	11	6	5	7	7	5	7	2	3	5	3	8	5
LOC100576747	73	205	219	184	261	220	311	289	112	165	217	319	351	371	371	399	419	521	497	499	444	250	321	111	391	116	122	105	187	198	398	645	1034	817	685	966	518	472	483	130	192	148	161	222	131
LOC100576748	0	2	2	0	1	1	1	2	1	0	0	1	2	0	0	0	0	1	0	3	0	2	0	0	1	1	0	0	0	0	0	1	1	0	2	2	0	1	0	1	0	0	0	1	1
LOC100576754	75	204	171	178	281	204	208	132	108	199	206	334	289	347	333	304	299	282	262	274	240	282	269	127	241	121	75	85	179	115	170	402	646	502	456	570	301	237	265	86	205	89	126	138	73
LOC100576758	55	98	85	36	30	55	118	59	44	47	85	168	33	56	94	93	56	38	262	109	21	100	61	67	192	121	121	42	52	41	1887	71	253	282	154	109	58	277	71	16	120	28	23	76	53
LOC100576759	98	651	418	494	579	497	539	259	87	621	588	859	782	743	644	623	625	524	450	500	510	828	847	528	429	233	182	198	208	188	229	561	969	683	721	733	620	406	500	122	344	130	156	236	154
LOC100576760	45	126	126	98	107	165	111	82	53	98	167	163	135	146	111	121	118	112	164	123	84	132	113	89	118	65	58	67	143	59	139	112	295	210	147	230	156	186	132	113	313	189	218	89	47
LOC100576761	18	79	73	63	117	89	90	55	26	56	94	114	96	102	133	143	95	113	104	106	100	101	73	56	86	62	29	39	48	43	128	92	250	165	179	232	158	110	94	46	64	51	56	65	36
LOC100576765	9	45	15	20	32	27	32	24	4	31	22	45	46	36	29	39	41	20	39	22	17	59	19	27	34	20	14	12	9	15	41	28	79	49	55	44	20	41	27	9	27	4	9	27	12
LOC100576767	0	1	0	1	3	4	2	1	1	6	1	2	2	2	3	5	2	4	2	1	1	1	3	1	0	0	0	0	0	0	0	2	9	3	3	6	2	2	0	0	4	0	3	2	0
LOC100576768	18	47	69	58	68	79	91	43	46	81	102	109	126	81	98	102	168	154	143	142	134	74	107	58	142	62	66	54	83	86	112	162	318	252	181	257	174	174	122	61	86	61	74	89	55
LOC100576770	120	433	193	183	346	193	223	188	117	242	353	522	232	257	339	386	265	183	184	166	176	500	351	254	156	139	65	70	125	77	215	210	538	389	302	356	289	303	182	42	209	51	50	93	64
LOC100576773	8	6	17	9	22	16	18	8	17	10	12	19	16	15	21	22	21	14	34	30	22	31	42	11	13	17	12	5	27	10	29	24	67	46	38	23	19	33	18	9	29	7	21	10	10
LOC100576774	75	206	113	119	218	134	200	120	109	178	167	245	248	274	261	311	237	176	167	215	164	305	231	136	182	124	65	61	117	102	210	286	498	362	332	381	256	331	202	74	193	51	82	86	73
LOC100576775	66	195	128	118	274	156	245	203	65	119	136	274	235	290	249	324	183	161	194	198	136	206	186	89	157	128	58	66	107	81	311	248	517	282	277	413	275	323	161	30	112	42	75	120	60
LOC100576779	0	0	0	0	0	0	0	0	0	0	0	0	0	0	0	2	0	0	0	0	0	1	2	0	0	2	0	0	0	1	0	0	12	0	0	0	1	1	1	0	0	0	0	0	2
LOC100576781	12	22	36	25	35	20	43	39	9	23	56	33	45	39	25	29	42	30	26	30	34	42	31	17	37	9	7	4	6	23	43	26	52	31	45	54	31	46	29	2	21	6	7	12	10
LOC100576783	3	4	1	3	11	0	2	0	3	0	0	4	7	6	4	5	1	5	11	11	1	5	2	0	6	2	0	0	6	1	2	3	44	1	9	12	5	3	3	2	9	2	1	1	0
LOC100576784	60	135	91	107	176	159	157	132	63	125	138	209	259	196	164	212	181	117	167	162	147	214	144	123	118	80	42	52	83	48	261	154	285	213	158	233	221	273	137	48	90	90	98	58	42
LOC100576789	5	30	28	31	18	23	34	17	12	21	32	47	41	33	35	31	45	28	44	36	28	28	46	29	31	12	9	15	23	8	26	41	88	79	65	94	58	36	51	12	43	17	15	31	10
LOC100576794	11	34	50	34	54	56	67	65	29	35	50	54	72	84	94	96	67	59	69	79	69	50	55	34	57	35	24	26	28	46	115	90	192	118	97	136	130	125	70	22	45	16	21	34	19
LOC100576795	69	104	145	87	93	110	123	50	132	114	153	210	146	175	109	115	284	246	224	226	211	176	169	129	299	118	91	89	118	112	171	210	582	448	403	324	262	371	232	79	173	64	82	133	99
LOC100576796	5	13	12	6	19	11	17	11	6	8	16	14	12	7	9	6	16	17	17	8	10	8	12	17	16	9	2	4	5	1	18	10	23	27	12	9	16	11	11	7	13	7	8	9	4
LOC100576797	130	8662	2917	2128	201	156	2991	4390	76	669	172	4258	599	3938	6226	3891	753	547	176	38	2086	697	1548	1470	40	48	39	36	52	60	129	4222	644	1292	265	9327	7465	432	7231	72	64	29	81	65	23
LOC100576799	81	296	223	204	313	268	268	138	100	333	326	351	405	397	298	326	335	392	339	432	396	437	399	226	284	136	98	91	105	167	181	341	728	510	478	475	432	260	362	79	226	82	148	212	105
LOC100576801	2	4	12	1	8	3	9	1	2	6	7	15	5	16	9	10	7	11	11	8	4	8	6	8	5	3	2	3	3	8	12	18	24	15	5	15	8	9	10	0	1	1	7	8	4
LOC100576803	20	38	46	43	60	36	42	31	25	49	73	63	58	50	42	30	67	59	70	62	39	83	54	35	143	63	45	36	39	31	72	56	245	137	133	73	65	91	39	24	104	28	49	62	54
LOC100576805	165	154	289	185	191	183	275	190	174	125	250	106	248	262	179	172	315	316	278	296	383	170	185	151	297	161	108	141	237	191	419	301	626	493	368	498	455	552	236	148	125	184	190	168	157
LOC100576812	77	242	200	190	279	213	247	170	103	251	262	376	353	387	281	362	297	285	274	264	252	324	276	199	267	152	68	85	150	134	283	363	715	477	433	461	425	450	275	77	222	64	113	148	94
LOC100576814	40	44	103	96	88	69	70	16	15	102	156	65	160	101	81	63	234	161	137	183	240	109	107	84	271	99	55	82	123	138	46	116	311	211	179	166	211	159	177	49	103	57	48	119	128
LOC100576816	1	2	3	0	1	1	1	0	0	1	1	0	0	0	1	1	4	3	0	0	1	1	1	0	5	0	1	0	0	0	0	0	21	2	4	5	5	3	3	0	0	0	0	0	0
LOC100576817	19	31	75	64	77	65	72	34	43	69	125	105	139	114	104	95	202	193	127	197	207	94	88	39	145	44	66	48	73	84	95	175	300	275	199	235	147	96	183	70	64	60	77	89	69
LOC100576818	63	127	102	90	123	120	102	86	105	117	123	198	124	147	108	110	175	116	178	129	117	132	149	110	166	91	58	62	102	71	189	129	335	237	238	219	227	342	146	41	119	62	59	109	57
LOC100576819	79	185	175	133	200	158	187	113	115	121	159	236	209	228	177	174	221	163	202	183	132	191	172	137	196	129	83	73	131	111	204	221	443	308	296	328	232	310	183	74	198	83	96	133	80
LOC100576820	3	9	6	10	6	7	3	4	2	4	13	6	11	9	5	7	8	12	12	12	8	8	7	2	12	4	6	11	18	5	10	9	30	14	17	22	8	21	11	2	12	31	31	12	6
LOC100576826	38	125	136	137	99	87	91	66	30	154	212	204	192	197	151	106	190	154	203	182	208	193	173	131	123	81	70	46	81	61	71	177	258	238	225	259	223	115	210	49	87	44	70	62	73
LOC100576828	5	54	25	47	27	28	8	7	10	25	13	44	20	23	28	35	20	29	24	30	42	17	8	11	11	10	10	20	13	2	11	28	41	50	55	58	24	22	38	3	11	4	4	8	4
LOC100576829	29	80	91	73	126	112	94	58	57	74	106	111	161	181	124	111	271	270	229	248	232	105	138	44	169	83	72	58	95	85	156	278	500	413	317	386	269	227	243	71	96	69	97	122	79
LOC100576831	0	3	4	0	4	0	3	2	0	0	2	1	5	3	4	4	2	5	3	1	1	2	1	0	4	7	0	1	0	1	3	5	9	5	3	4	4	1	4	3	3	0	1	3	0
LOC100576836	5	25	13	10	38	19	29	18	3	18	12	33	24	21	33	43	27	11	12	15	5	32	16	19	13	8	5	4	10	9	22	15	45	28	23	32	20	26	13	4	11	2	6	1	4
LOC100576838	3	4	2	1	2	2	6	2	3	3	1	4	2	3	1	1	2	1	3	1	2	1	3	1	2	0	0	0	0	2	11	0	9	4	1	3	3	5	0	2	0	0	0	1	1
LOC100576839	0	1	1	0	1	3	3	1	0	0	4	2	3	0	0	0	0	1	2	1	1	1	0	1	1	6	2	0	12	1	3	4	0	1	0	0	0	2	2	2	12	22	6	3	9
LOC100576840	1	48	18	26	31	28	24	23	8	15	19	30	29	36	27	23	36	12	31	8	19	19	24	17	16	27	8	21	24	12	10	24	46	24	27	22	26	26	29	4	24	7	8	9	10
LOC100576843	10	13	16	9	24	27	16	12	12	9	14	17	28	22	12	13	18	25	28	25	26	19	28	19	26	11	10	13	23	15	35	33	58	41	27	35	32	42	14	11	23	9	16	26	22
LOC100576847	1	7	3	2	2	5	5	4	7	6	6	10	5	11	7	8	4	2	5	5	4	5	6	2	7	1	2	2	1	1	8	2	11	2	9	8	5	5	8	2	1	2	0	0	1
LOC100576848	26	69	57	69	86	77	60	45	50	64	86	129	95	115	98	87	133	89	125	109	105	118	112	73	83	43	28	42	61	42	75	109	217	166	133	185	149	117	100	41	85	42	58	45	34
LOC100576850	65	195	131	134	199	168	165	108	94	170	227	261	187	203	200	198	220	174	203	139	142	262	211	122	182	84	76	58	100	95	180	226	428	333	266	318	202	237	130	55	148	50	70	109	59
LOC100576851	448	836	908	971	1090	1127	706	252	346	993	1356	1475	1498	1252	886	720	1937	1789	1337	1419	1999	1454	1302	683	1309	520	417	520	698	729	369	1361	2702	2356	2082	1847	1531	941	1537	428	854	434	614	704	503
LOC100576855	42	141	89	66	79	59	99	75	31	82	90	160	91	107	113	127	106	95	91	60	76	124	90	70	99	62	33	17	29	30	166	112	255	154	167	243	168	175	121	23	45	22	15	43	19
LOC100576859	4	10	20	15	23	18	23	12	5	12	19	29	25	26	21	19	18	19	16	16	23	22	26	15	27	10	8	5	20	6	23	28	53	39	34	57	41	22	22	10	11	17	22	7	6
LOC100576862	61	212	142	136	260	153	185	109	64	216	188	305	301	286	270	286	283	244	269	233	197	265	195	100	231	130	84	84	99	80	201	341	543	434	334	431	302	234	239	56	166	71	102	125	76
LOC100576863	10	21	19	15	30	21	22	21	8	21	13	34	25	24	18	25	19	8	29	21	11	23	28	14	11	9	10	9	16	5	19	26	45	35	25	49	30	41	21	10	20	14	11	10	4
LOC100576864	9	45	47	31	50	39	47	32	16	31	25	48	33	72	54	53	45	49	51	50	39	36	31	12	51	12	13	12	14	24	83	58	127	89	94	137	63	64	53	17	36	15	21	23	16
LOC100576866	91	132	123	170	155	162	168	162	117	130	178	213	222	230	141	202	215	219	235	181	177	191	216	135	202	117	59	56	73	91	284	205	403	299	275	315	320	323	171	58	134	55	95	102	61
LOC100576871	23	28	36	20	38	52	55	39	12	29	47	47	60	57	69	74	94	67	87	80	45	55	46	24	58	53	18	26	25	43	60	86	158	146	85	160	93	103	66	20	47	22	33	51	34
LOC100576872	24	66	63	48	84	46	69	45	26	72	80	92	105	96	93	92	85	72	77	57	65	68	79	52	51	42	9	23	33	31	71	102	170	159	102	147	104	114	91	8	46	23	29	43	12
LOC100576876	109	249	338	267	227	281	295	206	135	221	339	395	417	484	382	341	408	446	451	501	441	330	331	195	470	207	179	161	305	263	301	556	959	723	726	925	578	397	474	190	239	267	255	322	185
LOC100576878	1073	1500	2100	2500	1687	2324	2489	813	1098	1663	3038	2302	3443	2745	2181	2064	4427	3729	3722	3862	4648	3361	3073	1897	3887	1625	1909	1661	2710	1804	1825	3519	7227	5390	3817	4449	3609	3201	2842	2460	3245	3313	4285	2202	1932
LOC100576879	52	136	206	109	171	99	155	66	55	144	169	196	210	230	160	131	206	335	243	312	229	177	192	76	238	88	102	79	132	140	164	370	738	418	437	583	242	165	238	84	121	81	136	156	90
LOC100576881	2	9	10	5	6	3	4	7	1	8	1	6	6	5	3	2	3	3	4	9	3	8	6	5	2	0	0	1	1	2	2	9	20	1	5	11	8	14	1	1	2	0	0	0	0
LOC100576882	49	46	110	65	64	70	44	28	75	58	119	47	165	76	50	43	163	240	225	264	176	60	87	25	172	59	58	49	72	109	109	251	533	276	229	362	221	183	112	59	57	91	180	124	75
LOC100576885	42	105	79	69	159	90	184	135	25	90	66	164	199	180	197	250	142	121	171	105	108	156	111	66	102	83	43	46	74	47	219	160	306	201	248	278	255	235	113	16	82	54	46	70	46
LOC100576886	30	105	22	63	67	38	36	46	7	17	47	125	39	20	35	54	32	35	9	34	30	32	4	16	21	28	2	4	7	6	6	27	74	103	54	64	48	43	45	2	8	3	10	5	6
LOC100576891	0	1	1	0	0	0	0	0	0	1	2	0	0	2	1	1	2	1	1	0	0	0	0	0	1	0	0	0	0	0	1	1	0	7	1	0	0	3	1	0	1	1	3	0	0
LOC100576894	27	59	66	70	59	83	57	55	36	74	120	103	101	106	87	78	155	124	104	118	121	88	98	63	94	55	34	45	62	35	63	124	215	130	124	180	145	102	102	30	52	45	94	72	46
LOC100576895	137	85	62	74	514	166	81	59	158	233	374	123	447	57	72	60	635	431	327	317	184	197	239	103	206	49	63	30	45	196	264	80	239	278	396	135	208	493	114	48	128	9	24	80	171
LOC100576896	25	36	106	48	68	65	75	41	27	49	104	61	115	119	74	63	121	153	157	138	172	87	68	29	142	51	46	57	52	63	83	162	348	237	227	239	172	124	107	45	38	43	68	99	69
LOC100576898	90	280	171	128	259	165	263	200	91	249	203	411	290	405	299	392	192	150	182	171	195	409	274	178	139	71	36	79	73	65	292	262	383	233	200	285	259	275	196	31	93	39	52	73	41
LOC100576901	692	1440	1390	1510	1454	945	1013	308	1002	960	1473	2105	1453	1484	937	876	1565	1515	1467	1419	1305	1798	1206	1061	2268	704	593	502	763	680	855	1422	3763	2932	2221	2267	1628	1836	1389	455	828	394	582	1057	629
LOC100576902	2	6	15	12	11	15	3	0	3	2	6	3	11	8	1	3	6	14	19	18	6	3	15	4	14	1	5	1	10	6	7	10	29	20	19	11	5	14	17	2	4	4	0	17	7
LOC100576903	9	47	14	7	9	2	21	0	16	15	61	40	8	1	2	4	29	8	9	9	12	11	12	10	25	8	2	5	5	7	1	5	40	32	16	10	11	26	16	5	8	3	4	7	4
LOC100576908	24	35	77	61	79	78	62	12	25	76	114	72	150	117	56	40	187	236	163	211	238	115	99	44	176	37	57	55	111	82	16	174	258	274	225	253	167	41	162	69	91	65	102	95	67
LOC100576912	27	49	145	75	75	78	50	14	69	85	123	76	87	84	56	33	158	145	143	173	144	102	97	47	167	59	48	70	78	105	22	164	267	259	234	189	78	46	153	63	57	38	67	126	91
LOC100576914	1	0	2	1	0	0	0	1	0	0	2	3	2	0	1	0	0	2	2	0	0	1	1	1	1	0	1	0	0	0	1	3	5	0	4	1	1	0	0	1	0	0	0	0	0
LOC100576915	59	140	129	105	208	165	184	135	42	133	125	198	235	243	233	261	318	188	286	240	190	178	207	90	244	162	78	120	198	119	354	264	525	520	343	449	382	454	271	91	239	129	184	171	103
LOC100576916	0	3	3	6	3	2	1	4	0	4	1	9	1	4	4	4	1	1	0	2	2	0	2	1	0	1	1	1	0	2	2	6	6	1	2	3	5	2	2	0	2	0	1	1	0
LOC100576918	13	106	45	48	102	49	53	51	6	58	53	166	53	62	70	99	50	33	44	37	25	117	66	64	47	20	21	13	20	13	38	60	104	82	62	87	57	72	31	18	41	17	17	15	9
LOC100576919	6	14	7	9	6	7	17	3	3	6	16	7	19	31	20	11	37	27	33	27	36	23	15	6	20	6	16	1	16	11	15	45	85	37	28	65	42	12	26	19	12	41	34	42	8
LOC100576924	3	10	19	11	12	8	12	5	7	8	20	9	14	11	6	3	18	18	28	25	17	14	8	11	10	8	2	3	7	11	6	13	44	26	26	27	18	16	10	7	11	7	7	17	5
LOC100576930	60	294	144	124	262	145	172	148	19	168	158	325	192	215	206	265	138	90	121	96	93	257	166	141	91	63	29	51	44	44	137	128	274	180	148	230	185	169	148	22	108	46	37	47	33
LOC100576932	10	26	15	22	25	23	22	14	1	15	19	32	27	22	12	14	33	18	25	24	22	15	32	7	19	14	5	4	14	7	26	23	48	16	23	26	22	34	11	10	9	9	11	9	5
LOC100576934	29	50	96	52	41	40	56	35	25	65	64	74	48	124	58	49	90	117	97	123	103	79	109	40	78	46	42	41	52	40	20	93	183	146	137	158	175	61	147	54	85	36	47	58	67
LOC100576935	61	148	182	24	79	28	167	44	80	224	106	50	23	128	44	44	146	39	208	33	48	50	28	64	188	137	54	160	154	69	72	40	75	314	73	109	84	75	26	25	245	38	51	186	55
LOC100576936	4	15	13	15	16	27	16	8	6	8	13	8	36	7	7	13	10	5	18	7	10	23	9	12	13	20	2	1	3	1	16	17	28	17	21	19	14	17	5	2	12	4	2	5	3
LOC100576938	17	132	60	63	89	60	100	63	27	71	72	133	88	99	111	115	67	47	46	64	57	129	103	60	58	23	13	12	19	25	72	78	127	97	73	122	83	53	73	21	35	16	14	29	13
LOC100576940	3	0	0	0	1	0	0	0	0	0	0	1	2	0	1	2	6	0	0	2	1	0	1	0	0	0	1	0	1	3	1	0	0	0	1	2	3	0	3	0	0	0	0	0	0
LOC100576944	0	1	0	0	0	0	0	1	0	1	0	1	0	0	0	0	5	3	1	0	0	0	0	1	1	0	0	1	0	0	1	0	4	0	2	2	0	1	0	0	0	1	1	0	1
LOC100576945	234	637	267	321	560	366	522	400	219	472	441	808	522	687	557	788	358	259	278	235	238	828	588	513	217	143	57	74	80	88	595	345	590	407	284	452	510	460	286	35	151	33	36	116	53
LOC100576947	1	0	1	3	1	0	1	4	1	1	3	1	2	1	3	3	0	0	0	0	0	0	5	0	1	2	0	0	1	0	0	2	2	2	0	4	3	1	1	0	0	6	3	0	0
LOC100576948	9	16	36	32	39	73	28	6	27	48	119	16	141	34	25	28	234	235	123	234	283	75	72	31	172	62	73	76	107	126	21	145	169	157	162	95	127	26	127	85	75	148	132	95	96
LOC100576949	236	655	530	505	479	513	444	259	470	462	392	860	379	390	332	338	489	369	353	359	350	710	645	505	357	241	114	135	269	141	378	422	1024	991	480	513	452	642	318	99	338	103	115	272	145
LOC100576951	17	100	69	62	111	48	78	48	22	68	61	127	93	98	105	116	64	52	65	52	55	144	69	39	72	30	23	22	24	27	58	73	149	107	75	141	89	68	60	13	40	24	30	34	27
LOC100576953	0	0	0	3	0	0	0	0	0	0	0	0	0	2	1	0	2	0	0	0	0	0	0	0	0	0	0	0	0	0	0	1	1	1	1	2	1	0	2	0	0	0	0	2	0
LOC100576956	243	331	438	492	405	326	357	111	198	419	588	438	535	510	490	344	588	571	597	602	694	519	437	356	561	233	221	266	312	312	153	650	1258	818	834	891	588	317	508	225	378	235	295	369	326
LOC100576957	1	4	8	1	3	3	1	3	5	7	8	4	3	7	11	8	14	6	3	8	5	5	12	1	5	4	3	1	1	5	1	6	17	14	10	17	8	3	9	0	6	1	0	3	1
LOC100576958	77	173	166	152	216	196	184	126	143	182	230	291	285	327	218	199	377	347	315	428	328	247	232	125	375	155	114	89	164	158	235	378	743	650	566	506	321	332	354	93	224	130	166	202	131
LOC100576960	221	543	369	412	674	429	559	433	157	431	425	732	856	780	752	914	545	488	527	491	515	702	608	457	452	235	117	156	239	187	841	633	1139	784	715	917	924	935	560	105	349	145	173	255	145
LOC100576961	10	22	24	24	24	31	15	15	7	26	33	29	32	21	19	15	22	24	15	22	19	27	29	23	16	15	4	7	16	2	7	15	40	26	18	22	29	19	14	11	13	11	20	8	12
LOC100576963	23	22	45	44	53	44	67	11	29	47	82	55	85	70	35	28	114	122	100	120	160	95	74	21	79	26	26	23	42	45	13	87	172	133	115	128	96	36	112	44	33	50	68	49	38
LOC100576964	0	0	0	0	0	0	0	0	0	0	0	0	0	0	0	0	0	0	0	0	0	0	0	0	0	0	0	0	0	0	0	0	0	0	0	0	0	1	0	0	0	0	0	0	0
LOC100576965	1	3	11	12	9	11	4	0	1	13	11	2	6	17	8	1	22	24	12	11	11	12	10	5	24	2	7	0	2	5	2	14	34	14	11	18	23	3	12	8	7	5	6	7	4
LOC100576966	29	35	47	25	60	49	48	49	20	31	35	51	87	69	64	75	76	61	97	68	53	50	42	27	72	45	21	37	67	34	155	92	194	140	115	140	96	227	60	17	71	35	55	50	30
LOC100576967	82	263	163	119	252	153	184	177	126	131	196	243	181	221	212	232	128	115	115	115	114	215	113	179	87	54	41	30	50	58	163	155	264	187	135	182	151	194	97	17	62	31	29	51	32
LOC100576968	53	154	127	145	177	157	145	69	103	164	183	210	240	207	197	173	334	313	283	273	323	215	189	90	228	89	101	73	99	125	162	250	664	443	399	372	305	211	288	84	124	96	116	152	80
LOC100576972	27	117	135	103	150	119	115	85	37	94	130	112	156	175	110	91	189	189	147	182	134	138	122	76	144	72	38	46	72	86	106	183	380	248	242	271	176	157	166	61	77	63	76	80	53
LOC100576974	65	144	124	111	212	150	130	92	47	136	161	199	172	141	151	159	172	136	178	133	129	179	121	104	138	92	52	61	75	71	141	145	313	264	200	182	181	221	105	52	115	54	58	74	59
LOC100576975	52	251	145	109	267	120	152	97	32	203	184	262	223	245	269	250	169	162	165	159	129	286	189	137	125	90	53	48	95	82	144	223	349	255	294	384	206	192	164	48	118	60	61	77	57
LOC100576976	2	2	9	11	11	20	18	11	2	6	13	20	11	22	16	19	19	5	4	14	17	14	30	14	8	5	4	4	23	12	19	20	17	27	24	12	17	8	10	2	10	17	9	21	16
LOC100576982	7	20	14	19	31	26	15	12	1	24	36	12	67	19	19	20	9	23	15	20	29	29	23	19	23	123	6	12	42	38	8	20	24	6	46	21	17	17	17	21	30	18	279	143	17
LOC100576983	41	89	75	54	147	63	76	47	50	68	93	105	85	82	88	65	75	47	74	49	51	93	63	70	40	35	16	15	26	16	31	69	101	68	66	74	57	71	45	24	47	18	22	38	20
LOC100576984	0	1	0	2	2	0	0	0	0	2	0	0	0	1	0	0	0	0	0	1	0	0	0	0	2	0	0	0	0	0	0	2	7	0	3	3	0	0	0	0	0	0	2	0	2
LOC100576985	77	132	105	99	132	119	106	84	85	124	159	181	133	107	98	102	141	123	96	87	67	114	100	118	119	75	40	33	61	49	81	89	267	183	109	143	128	172	86	37	93	32	50	93	61
LOC100576986	2	1	8	1	2	0	2	1	0	5	3	0	3	6	4	3	5	4	3	3	8	4	4	3	0	5	1	3	2	4	2	9	3	4	13	8	10	4	0	3	1	1	5	1	0
LOC100576989	3	7	9	5	12	10	15	7	1	10	7	21	11	14	12	7	12	33	9	16	11	15	12	7	9	3	2	5	14	4	9	24	31	29	18	19	20	10	8	8	13	21	27	6	8
LOC100576990	15	44	46	43	63	35	67	80	24	25	44	57	56	55	76	95	63	45	71	67	37	40	61	26	40	28	15	14	34	26	121	70	141	106	98	117	69	121	72	18	54	28	24	39	18
LOC100576992	0	0	0	1	0	0	0	0	0	3	1	0	0	0	0	0	2	1	0	1	1	1	0	0	0	0	1	0	1	1	0	1	2	0	2	1	0	2	0	0	1	0	1	0	0
LOC100576993	60	226	619	342	395	326	457	110	142	381	600	333	561	285	291	263	552	648	536	583	616	350	385	213	639	231	252	273	362	310	165	594	1627	849	901	659	526	318	419	281	307	419	610	470	380
LOC100576994	17	27	22	19	40	22	26	14	6	11	18	31	25	18	14	21	15	16	20	20	15	15	32	7	7	5	9	6	1	13	27	24	44	15	26	30	17	23	12	3	8	2	1	8	6
LOC100576996	11	37	40	34	33	23	36	22	17	45	21	82	56	42	68	82	59	47	45	42	34	38	33	26	35	32	15	13	28	16	69	72	94	41	48	84	62	117	44	10	33	8	26	20	17
LOC100577000	184	515	278	385	476	407	521	326	325	542	500	637	773	785	512	808	461	389	426	382	391	712	547	416	312	166	95	106	142	109	823	351	893	623	540	570	756	607	398	72	164	125	142	134	74
LOC100577002	123	210	342	300	410	310	261	113	123	263	416	427	496	541	373	284	624	587	448	553	637	485	377	297	343	235	162	178	276	303	179	542	1130	808	702	537	575	310	461	213	228	250	328	269	252
LOC100577003	45	88	104	80	107	110	112	67	53	78	96	126	108	114	74	99	155	91	126	91	110	94	94	53	90	57	30	33	38	40	183	117	261	159	131	175	115	217	103	34	64	45	38	62	41
LOC100577004	39	46	67	67	109	62	50	17	20	48	101	61	100	76	58	45	115	136	125	155	125	71	67	32	69	25	16	13	41	40	64	147	332	157	154	192	96	57	100	35	40	31	44	36	37
LOC100577014	308	600	899	719	664	739	597	222	448	616	1041	820	867	958	658	514	1071	922	1032	926	1177	805	664	490	999	441	394	497	725	502	355	1009	2053	1958	1536	1460	1051	740	971	462	557	710	881	724	590
LOC100577015	0	0	0	0	0	1	0	0	0	1	0	0	0	0	0	0	0	0	0	0	0	0	0	0	0	0	0	0	0	0	0	0	1	0	0	0	0	0	0	0	0	0	0	0	0
LOC100577017	1	1	1	1	0	0	1	3	2	1	1	0	4	2	1	1	3	4	3	2	4	2	2	3	4	1	0	0	4	0	4	0	4	0	2	5	4	4	0	0	0	1	1	1	1
LOC100577018	0	0	0	0	0	1	0	0	0	1	0	0	0	0	0	0	0	0	0	0	0	0	0	0	1	0	0	0	0	0	0	0	1	1	1	0	0	1	1	0	0	0	0	0	0
LOC100577019	72	98	171	166	166	281	73	40	63	133	244	208	175	120	149	89	219	259	190	232	234	129	151	82	135	55	64	66	70	55	29	164	413	371	236	276	223	90	186	47	85	28	71	96	65
LOC100577020	4	17	9	18	14	8	11	15	4	15	29	11	12	23	10	7	20	11	8	14	20	11	12	10	5	0	3	1	2	4	12	13	33	19	13	29	18	24	11	0	5	4	7	3	3
LOC100577024	5	8	13	4	19	5	5	4	8	6	21	9	20	5	5	8	16	9	1	8	4	11	14	6	1	5	6	0	2	3	12	5	14	7	4	10	7	9	3	0	3	1	0	1	0
LOC100577026	138	149	205	206	394	177	133	55	153	174	271	304	365	118	86	116	297	298	202	241	212	284	195	168	353	136	127	94	129	149	313	168	720	371	428	361	239	682	244	42	231	38	96	163	135
LOC100577027	43	117	79	90	140	116	156	144	44	68	113	152	159	171	158	224	134	106	128	131	80	106	103	111	115	52	18	35	39	46	214	138	252	199	116	266	191	216	94	28	56	27	27	43	26
LOC100577028	24	28	40	39	50	50	54	33	20	18	38	17	62	37	46	54	34	54	35	16	31	25	39	21	26	21	7	9	7	14	47	29	124	70	48	51	58	94	55	8	15	7	13	21	14
LOC100577030	33	49	85	95	146	73	84	17	68	112	190	88	168	101	91	80	287	198	114	219	186	186	107	41	173	58	56	95	87	102	54	108	322	223	231	210	183	92	145	58	94	93	101	124	130
LOC100577033	36	108	86	60	83	80	118	78	23	84	83	100	88	118	126	119	88	92	100	66	56	98	83	54	75	56	31	35	36	41	98	119	194	161	99	194	122	124	99	27	67	31	32	59	28
LOC100577039	3	0	1	2	4	1	1	1	0	0	2	1	2	2	0	0	0	2	4	1	1	0	1	0	2	1	0	3	16	1	2	2	2	1	2	3	0	0	1	1	5	12	21	3	0
LOC100577041	0	0	0	0	0	0	1	0	0	0	0	0	3	0	0	0	0	0	0	0	0	0	0	0	0	1	0	0	1	0	0	0	0	0	0	0	0	0	0	0	0	0	0	0	0
LOC100577043	1	7	8	4	6	5	4	10	1	7	5	8	18	8	13	8	1	1	1	6	0	7	13	8	1	1	1	1	7	3	13	3	7	6	5	4	6	8	2	0	13	13	33	7	0
LOC100577044	156	302	399	542	412	556	401	246	221	279	408	435	609	467	320	442	480	398	526	648	764	434	606	306	357	128	85	159	256	136	499	487	882	638	472	745	667	519	384	75	226	165	204	159	111
LOC100577045	12	9	27	27	42	21	11	6	12	22	24	10	22	25	20	12	22	35	19	41	46	26	29	10	42	12	8	12	10	20	17	34	83	46	36	56	26	3	28	15	9	11	17	26	18
LOC100577046	18	44	50	45	57	45	65	42	34	31	62	74	37	71	58	57	58	58	53	48	51	47	95	52	52	22	20	18	20	23	57	75	130	92	65	96	52	63	43	23	33	21	31	56	19
LOC100577047	11	37	70	48	39	27	51	18	32	70	82	63	73	60	55	32	80	98	38	78	98	66	58	24	55	25	27	13	20	46	35	82	126	123	96	217	54	39	61	23	23	9	17	29	22
LOC100577050	54	186	133	178	178	161	172	90	74	197	211	192	209	258	232	202	279	269	232	241	231	257	214	108	202	134	86	80	166	126	136	239	423	332	336	357	237	194	184	84	175	137	155	144	92
LOC100577053	90	215	189	219	400	529	221	134	114	292	327	391	326	248	284	271	289	221	313	219	212	225	224	146	180	107	53	83	165	96	226	258	680	509	398	455	376	379	248	30	179	62	109	126	55
LOC100577054	553	1067	1213	378	498	350	1012	1196	156	553	839	1173	552	854	1062	1595	589	942	846	313	419	156	260	748	280	326	160	234	188	175	865	661	3111	1150	945	1365	1230	1336	870	119	567	152	303	248	168
LOC100577057	17	45	27	33	40	54	44	37	16	53	35	52	42	77	29	64	60	36	51	44	32	66	63	43	42	16	2	16	21	12	63	50	87	49	53	68	69	50	33	9	24	3	8	15	5
LOC100577060	53	163	111	120	175	113	157	103	50	159	149	170	188	217	164	193	96	119	122	127	109	192	152	95	75	50	34	46	47	50	150	160	284	166	150	243	201	132	124	36	94	30	37	44	46
LOC100577064	0	9	4	4	2	2	3	6	0	14	6	4	8	7	8	6	10	9	6	3	19	10	3	5	5	4	1	2	11	3	5	5	9	8	15	16	0	3	5	3	1	2	3	2	0
LOC100577065	0	2	4	0	1	1	0	0	0	0	0	0	0	0	3	2	0	0	0	0	1	0	1	0	0	1	0	0	0	0	3	0	4	0	0	0	1	0	0	1	0	3	1	1	0
LOC100577068	3	2	0	1	1	0	0	0	0	2	0	3	0	0	0	0	1	0	2	1	1	0	0	0	2	1	0	0	0	0	0	1	0	0	3	2	3	4	2	0	0	0	0	0	0
LOC100577069	0	1	0	1	0	0	1	0	1	0	2	1	0	0	0	0	0	1	0	0	1	0	0	0	1	1	0	0	0	0	0	1	0	1	0	0	1	3	0	1	0	2	2	0	0
LOC100577071	3	10	4	9	4	7	5	4	1	4	8	3	9	3	4	3	3	5	13	11	7	7	5	4	4	10	9	8	16	4	13	5	8	6	7	9	8	10	2	5	14	17	12	11	3
LOC100577073	14	22	15	13	20	14	19	15	5	9	15	40	22	13	4	12	21	20	27	11	12	22	17	5	8	5	2	1	3	3	26	11	32	20	6	22	19	26	12	3	9	3	0	2	3
LOC100577080	0	0	0	2	0	2	0	0	2	0	1	0	2	0	0	0	1	0	0	2	1	0	0	1	2	0	1	1	0	1	0	0	5	0	3	2	0	2	0	3	2	1	0	1	2
LOC100577081	68	140	128	121	180	199	170	102	41	114	160	216	173	207	131	179	213	164	183	173	160	199	169	121	147	81	46	57	83	48	139	224	457	301	241	285	255	247	177	37	115	34	60	88	53
LOC100577082	117	212	222	168	390	260	245	159	188	214	311	345	429	262	74	173	566	351	362	505	353	281	364	186	179	71	31	37	141	120	350	415	1153	872	302	603	386	391	300	48	163	83	74	82	67
LOC100577091	3	2	1	3	4	7	3	2	6	2	3	5	5	3	3	3	9	3	4	2	1	6	5	0	6	5	2	3	7	6	3	3	5	19	3	4	4	5	2	5	8	9	11	6	0
LOC100577092	220	192	291	232	397	321	368	253	154	232	300	213	475	362	254	301	366	273	342	338	308	243	278	201	280	138	79	89	127	113	539	358	971	446	320	388	383	682	168	70	192	128	148	131	126
LOC100577094	141	585	329	285	564	381	358	275	204	404	475	654	547	510	606	605	397	378	354	322	259	619	437	386	280	172	85	89	140	103	290	355	617	554	418	552	554	383	430	64	223	87	108	123	85
LOC100577098	59	64	86	39	57	13	63	22	22	50	62	22	61	82	35	75	64	72	50	27	67	54	56	35	44	17	10	15	10	21	65	74	218	119	64	180	118	73	56	13	18	5	13	42	13
LOC100577101	0	0	1	2	2	1	3	0	0	1	0	2	0	0	1	2	6	0	2	0	0	3	0	2	1	0	0	0	2	1	0	0	2	1	1	3	4	2	3	0	2	4	0	1	0
LOC100577102	61	102	119	92	148	125	173	104	71	105	142	170	212	205	179	189	319	261	287	227	213	181	186	91	243	110	96	95	141	83	176	267	555	389	402	448	331	304	281	91	115	185	190	151	68
LOC100577106	1	14	9	10	6	3	9	5	2	11	11	14	13	23	11	10	8	9	10	8	19	14	9	14	9	4	7	2	1	5	7	22	29	26	45	17	23	15	22	3	6	5	4	9	7
LOC100577107	4	0	7	3	2	7	1	0	2	1	1	4	1	0	2	2	6	4	6	2	4	0	2	4	8	5	1	0	0	2	5	2	13	3	7	8	7	7	0	3	1	3	0	2	4
LOC100577110	1	0	0	0	1	0	0	0	0	0	1	0	0	1	0	0	3	0	0	2	0	1	0	0	1	0	0	0	0	0	0	2	1	0	4	2	0	0	0	0	0	2	2	0	0
LOC100577112	133	909	373	395	415	161	370	385	169	295	421	779	363	277	320	455	237	188	486	601	201	470	319	398	313	402	196	130	263	251	330	218	759	368	386	332	312	293	301	94	384	339	172	397	148
LOC100577113	23	14	15	24	36	13	27	12	14	22	26	29	33	46	21	25	35	26	39	52	36	26	30	16	24	14	7	7	15	23	54	32	146	42	54	40	43	32	33	12	28	5	17	17	16
LOC100577118	3	10	15	4	28	12	9	2	3	22	29	11	11	21	7	5	34	18	23	21	15	18	24	3	13	6	9	2	9	3	7	29	58	22	19	17	21	11	24	5	6	4	7	8	4
LOC100577120	7	30	28	19	33	26	30	17	8	18	34	46	52	40	38	32	36	32	45	50	36	32	32	18	38	17	11	14	20	20	42	46	92	80	56	75	61	44	42	13	31	8	8	11	14
LOC100577121	5	8	17	8	27	12	4	9	3	17	14	7	21	11	8	3	12	12	9	7	14	7	18	7	18	4	5	5	4	9	2	11	35	16	22	25	6	7	13	5	9	7	5	7	6
LOC100577122	48	85	83	78	107	96	110	70	51	81	114	100	149	146	97	105	137	103	117	94	104	98	97	87	117	63	42	47	50	43	113	134	235	181	148	202	179	147	114	45	90	36	51	55	37
LOC100577127	13	58	63	67	66	65	78	38	14	72	76	73	145	118	90	77	111	112	96	119	98	89	80	30	107	33	37	47	68	51	59	153	188	161	200	202	138	90	86	29	83	34	65	54	36
LOC100577128	201	463	237	243	264	171	188	121	195	195	251	563	210	267	261	321	251	169	160	138	144	446	314	349	264	126	64	59	96	104	273	171	335	330	344	358	253	656	190	39	170	49	45	97	75
LOC100577132	1	2	0	0	0	1	0	0	0	1	3	1	3	0	0	0	1	4	0	2	2	1	2	0	1	3	4	3	5	1	0	0	4	1	3	3	0	3	0	1	7	2	6	2	3
LOC100577135	36	33	26	24	38	34	65	16	43	61	284	51	59	45	36	37	169	103	205	131	100	152	66	47	403	332	150	189	236	272	80	49	162	313	208	46	107	514	175	63	378	123	152	280	235
LOC100577136	37	46	31	30	60	56	50	47	35	26	40	66	46	57	28	49	83	40	55	45	32	39	43	31	51	26	16	15	30	25	104	49	155	77	55	73	89	133	49	16	43	16	24	26	11
LOC100577138	93	187	373	251	219	277	192	62	178	283	438	324	402	385	245	177	647	711	497	577	797	400	321	157	519	158	204	221	343	217	91	558	1375	835	755	765	508	192	542	206	233	209	313	281	239
LOC100577139	55	123	384	312	248	357	202	73	179	249	432	184	582	345	218	160	476	841	493	782	695	287	334	109	643	146	278	250	273	303	166	747	1407	1006	895	873	541	295	511	278	187	382	507	404	329
LOC100577140	29	58	82	92	89	77	65	30	48	112	132	116	162	99	94	78	217	183	119	174	161	111	99	61	131	55	49	27	69	68	56	185	260	310	250	263	162	108	194	40	88	37	48	69	54
LOC100577142	343	386	336	459	587	518	290	165	168	403	1551	1160	801	471	581	452	1275	613	1102	622	522	428	358	287	550	364	77	726	509	210	144	423	784	2249	1039	1069	407	1062	708	77	667	120	216	65	208
LOC100577143	4525	5798	4749	6432	6988	5090	4437	2151	4719	3661	4911	11689	6683	4217	3831	5330	8975	4556	6075	4693	2850	5810	3480	4663	6655	2407	1748	1794	1669	1667	8044	3955	13146	11647	8842	7307	6595	16437	4646	1388	2426	841	1432	2790	1287
LOC100577145	153	339	302	332	364	329	484	322	206	315	481	601	524	702	402	578	720	515	565	407	434	450	465	345	413	236	114	150	262	153	703	585	1188	856	664	815	896	807	565	121	361	176	291	207	151
LOC100577146	0	1	0	1	2	4	0	2	0	0	2	0	0	0	0	0	3	2	0	3	2	0	0	0	2	0	2	0	1	0	0	5	4	1	4	0	0	0	1	2	4	1	1	0	1
LOC100577147	4	2	12	3	6	5	2	3	4	7	7	6	12	4	2	2	13	8	8	5	13	14	6	5	4	2	0	0	5	1	8	20	31	20	11	27	8	8	8	0	5	8	7	3	6
LOC100577149	438	373	641	763	1363	638	396	184	695	837	2092	1090	674	540	659	528	905	735	629	498	804	849	455	321	681	246	182	128	239	246	578	552	1785	1294	1458	745	451	2124	404	138	305	106	136	423	244
LOC100577150	50	92	56	58	136	91	50	16	108	102	50	58	91	43	58	64	56	75	84	162	201	119	114	100	62	41	22	50	69	18	66	122	220	139	178	112	126	30	97	27	73	70	41	62	15
LOC100577151	0	2	0	1	1	0	1	1	0	0	0	1	0	0	0	0	2	1	0	1	1	2	1	0	0	0	0	0	3	3	0	3	2	2	1	3	0	0	1	0	1	0	8	2	3
LOC100577155	7	13	11	15	20	3	12	6	8	9	8	2	15	6	4	5	3	4	2	9	5	4	11	7	6	1	0	1	4	4	7	9	19	9	5	7	7	13	3	0	5	2	2	3	1
LOC100577156	22272	30397	36981	47974	29375	30561	30114	9562	38167	25433	32883	87498	30477	25324	16793	23200	53466	21960	34571	22723	22700	37024	22092	31592	29292	16609	10306	23562	24006	16087	21637	22704	61087	61102	60217	37386	38244	52367	22243	9943	21917	10426	19698	20184	15331
LOC100577159	1	6	8	8	6	5	6	6	2	9	8	3	3	12	2	0	11	11	8	19	16	11	2	10	3	7	1	5	10	4	6	4	24	11	8	15	16	9	7	9	3	6	4	4	4
LOC100577161	78	110	69	54	83	38	105	34	91	36	94	124	57	59	60	58	60	137	59	54	41	185	56	57	352	83	87	59	41	95	79	72	246	291	139	117	93	274	86	41	87	15	38	123	93
LOC100577163	1004	1642	2948	474	1344	434	1902	1224	1548	1118	2139	1831	588	1161	1130	1177	1379	529	2868	1394	683	976	911	721	1633	1094	389	696	761	1131	1620	759	2645	4111	1459	1685	1055	3423	827	404	1008	138	235	1317	780
LOC100577165	0	1	1	3	10	0	9	1	2	2	4	0	2	1	2	2	7	5	2	7	2	1	5	1	2	4	0	1	6	4	1	5	6	5	2	3	9	3	0	1	3	0	6	1	0
LOC100577168	61	84	117	132	142	182	160	74	45	120	209	171	175	219	104	135	187	164	153	151	194	136	143	151	152	102	39	47	59	60	143	157	381	253	214	172	195	194	121	44	72	45	82	72	42
LOC100577174	95	142	213	214	250	228	220	260	112	164	192	246	447	205	194	148	334	237	368	368	312	136	232	135	343	133	108	85	154	127	470	325	826	413	527	345	233	654	284	124	137	170	232	235	105
LOC100577178	22	561	225	62	19	47	337	585	24	159	52	90	68	352	245	432	56	59	76	26	116	176	273	134	27	33	46	118	20	18	61	388	690	209	107	766	167	48	201	41	79	71	12	96	10
LOC100577180	13	52	38	54	50	45	46	30	20	52	58	52	67	51	44	47	46	47	72	64	44	62	59	29	44	19	29	19	23	24	40	65	98	84	59	85	71	65	47	16	39	19	28	29	18
LOC100577188	8	10	12	14	12	22	8	3	10	13	22	3	31	18	10	8	25	50	31	46	42	17	20	7	45	15	18	13	23	21	7	33	58	49	65	49	11	16	34	15	30	30	27	38	20
LOC100577192	144	598	278	293	488	664	417	485	102	220	374	712	402	761	693	655	458	292	415	363	353	449	327	272	220	152	104	105	172	102	520	485	1015	625	346	796	934	504	676	84	242	86	63	126	77
LOC100577194	12	64	34	36	65	33	44	22	14	33	50	74	67	74	50	66	54	51	58	66	46	55	57	39	40	15	6	11	21	20	51	62	123	107	102	88	70	54	64	10	49	12	12	22	14
LOC100577196	13	20	32	35	16	16	17	8	14	27	31	24	33	49	26	26	47	88	28	66	83	44	44	17	68	20	16	14	26	34	20	61	120	122	67	107	39	28	73	19	22	24	22	28	33
LOC100577197	1	13	7	6	12	5	4	8	1	2	3	12	8	7	10	10	5	7	12	7	3	5	11	4	1	6	2	2	2	2	11	4	9	9	6	17	5	5	9	3	5	5	2	3	1
LOC100577198	147	356	393	382	285	309	374	216	151	309	404	490	762	845	304	319	571	797	637	508	773	321	512	283	330	113	117	109	135	221	362	847	1574	715	688	930	1158	442	1012	110	148	105	127	191	181
LOC100577202	60	150	104	109	163	135	130	132	79	103	184	229	213	162	161	168	166	124	143	156	119	212	151	95	140	68	44	40	66	67	241	163	306	231	194	264	189	255	128	31	116	30	47	70	28
LOC100577209	161	844	481	671	742	718	897	482	188	876	758	1032	1411	1459	1002	1162	1136	897	726	663	838	1933	1068	845	677	266	161	172	253	220	568	978	1352	906	866	1254	1148	662	861	131	353	120	194	200	142
LOC100577213	12	33	28	38	58	41	51	34	20	24	28	35	62	53	24	31	20	51	77	64	75	28	55	40	21	25	4	12	12	29	42	39	97	46	113	112	76	23	33	13	20	16	10	41	14
LOC100577214	43	55	88	65	114	107	127	62	75	91	132	96	135	142	91	93	236	210	147	138	187	115	99	42	127	58	39	42	51	72	142	163	407	293	193	211	180	253	142	48	66	60	69	98	51
LOC100577220	10	20	31	11	24	16	27	7	14	8	23	21	22	27	20	15	35	15	39	39	21	18	27	13	24	7	8	12	12	17	17	37	38	39	28	61	31	20	24	12	16	21	22	10	9
LOC100577221	13	33	46	32	39	33	57	35	21	48	54	66	90	70	50	62	80	77	86	53	63	52	55	17	72	32	18	13	32	29	63	73	153	119	106	133	76	80	60	16	36	15	15	37	18
LOC100577222	17	29	13	28	20	20	23	35	12	16	26	27	28	35	22	28	30	5	38	34	18	25	23	21	10	14	5	5	13	8	30	23	55	37	31	19	40	30	13	7	14	7	24	11	4
LOC100577224	35	47	35	62	111	77	63	91	41	43	58	110	110	99	125	136	113	62	96	83	67	77	67	33	100	59	29	20	56	38	408	131	366	276	151	198	105	360	97	15	65	26	59	46	30
LOC100577226	0	2	6	1	8	1	2	2	1	2	6	3	6	2	6	5	5	7	5	5	4	3	6	3	7	3	1	0	3	4	3	6	13	7	8	7	4	2	1	2	5	3	4	2	1
LOC100577228	18	67	44	50	66	49	84	55	18	56	37	93	81	90	94	87	106	101	84	75	77	84	62	34	42	30	25	16	31	43	77	113	179	133	125	165	102	90	91	25	31	18	25	41	24
LOC100577229	12	41	56	59	70	33	45	36	38	36	91	56	85	64	85	74	41	75	44	44	67	57	55	47	43	25	23	5	1	20	31	84	81	23	49	103	78	42	52	8	23	3	10	30	19
LOC100577231	5	5	10	16	20	8	5	4	1	6	13	6	12	3	10	3	18	16	16	26	20	5	9	5	24	2	5	9	1	11	9	32	36	23	24	21	17	3	15	4	5	8	12	6	8
LOC100577235	0	0	0	0	1	0	0	0	1	1	0	2	0	0	0	0	1	0	0	0	0	2	0	0	0	0	2	1	0	0	0	0	0	2	2	1	1	0	0	0	2	0	0	1	0
LOC100577237	8	23	27	21	51	36	40	12	14	19	37	34	44	41	15	14	52	53	41	55	48	30	24	19	32	20	9	17	15	17	26	51	95	63	51	69	58	34	24	8	21	16	18	22	15
LOC100577239	26	20	38	23	26	29	31	6	5	43	31	25	52	26	11	15	64	50	52	28	51	51	28	21	35	3	0	2	16	18	27	38	117	43	64	87	60	36	46	3	21	6	8	11	5
LOC100577242	188	405	781	617	540	1016	487	130	355	572	871	676	1393	870	550	464	2334	1717	2184	1857	1823	865	767	349	1415	443	728	1257	1481	809	243	1270	2733	2030	2509	1608	1160	693	2159	895	883	2177	2533	973	830
LOC100577250	12	23	20	16	33	17	36	21	2	36	29	51	41	38	39	32	35	30	23	31	37	43	23	18	39	17	7	6	17	17	33	48	74	64	50	92	39	54	39	11	30	11	16	14	7
LOC100577252	30	87	106	119	109	195	108	74	55	99	161	151	163	139	117	128	205	172	188	224	172	132	158	93	147	91	72	50	97	63	173	250	397	263	213	321	236	205	168	84	136	75	108	74	61
LOC100577253	75	279	295	212	304	317	396	398	147	163	342	333	484	466	453	529	623	538	620	568	501	243	355	146	615	199	132	126	186	197	884	663	1442	1000	889	1315	955	1019	523	114	182	110	162	257	163
LOC100577254	4	20	43	17	30	18	29	22	11	37	39	22	38	21	17	13	40	53	59	62	37	32	26	10	47	22	30	8	10	31	24	42	160	76	76	85	41	26	44	17	18	14	24	27	30
LOC100577255	0	1	0	0	1	1	1	0	0	0	0	0	0	0	1	0	1	0	1	0	1	0	0	0	1	1	0	0	0	0	1	0	4	4	0	3	1	1	0	1	1	3	1	0	0
LOC100577263	59	120	96	84	127	154	196	136	66	96	120	186	238	204	181	198	251	198	197	201	161	187	140	112	185	90	55	71	85	78	337	222	473	294	264	320	321	303	155	42	83	60	68	86	58
LOC100577268	29	117	105	128	72	83	64	38	14	101	187	118	112	193	116	81	190	102	138	93	183	100	92	84	157	40	117	58	92	68	33	169	219	204	174	252	163	64	103	107	117	100	136	75	87
LOC100577269	1	1	0	0	2	3	1	2	0	0	0	1	2	1	1	1	1	3	1	1	3	0	1	3	0	1	0	0	1	0	0	3	2	0	2	5	1	1	5	1	0	0	2	1	0
LOC100577272	61	107	186	147	150	203	133	70	83	170	246	153	276	254	130	119	313	391	329	352	353	190	190	104	310	99	102	79	137	176	115	377	677	485	457	543	320	199	284	106	128	124	122	180	135
LOC100577273	12	15	51	34	46	60	44	24	28	33	43	18	86	37	17	13	74	59	78	52	74	24	32	22	37	21	3	14	25	34	58	75	154	73	60	77	61	62	33	16	17	19	24	33	14
LOC100577279	47	251	141	116	237	125	138	92	67	169	189	264	190	179	203	206	182	121	117	173	114	271	179	124	125	81	37	46	72	71	140	150	326	259	195	283	224	185	122	31	130	39	54	68	39
LOC100577280	62	108	292	189	186	241	200	152	107	190	344	247	442	340	219	219	532	931	528	970	805	277	252	80	686	118	233	197	313	317	331	781	1313	1088	966	1392	495	276	627	257	150	290	443	328	329
LOC100577283	10	16	43	25	27	37	18	1	15	28	65	17	37	44	37	21	65	74	51	42	66	21	28	6	54	34	26	20	23	27	12	47	110	61	51	86	56	37	61	30	13	29	35	30	29
LOC100577285	115	315	167	159	331	152	218	182	68	239	272	407	221	290	237	285	223	165	154	127	103	415	243	195	125	84	42	50	83	47	219	177	323	215	159	244	226	254	165	30	127	46	63	85	45
LOC100577288	39	174	102	126	191	120	145	118	73	130	166	213	223	189	215	242	220	197	175	222	125	207	173	82	171	92	32	54	96	79	197	208	420	315	244	268	230	293	202	38	137	43	89	60	56
LOC100577293	73	178	116	112	207	157	195	178	62	185	162	260	195	213	202	290	97	83	130	101	79	234	142	133	51	49	30	40	43	29	225	124	234	174	106	228	162	251	110	21	63	21	44	47	16
LOC100577295	53	85	123	96	100	130	115	64	57	105	147	172	156	136	106	107	201	216	193	201	163	133	135	92	213	93	59	55	106	95	115	194	374	339	287	315	203	188	190	77	125	87	112	94	75
LOC100577296	6	28	29	17	20	19	23	18	9	13	33	28	21	33	18	34	25	27	32	28	21	21	17	22	28	11	8	4	13	7	24	27	55	41	28	55	39	39	28	9	19	6	8	16	8
LOC100577300	44	53	34	36	94	45	103	79	57	49	43	76	151	89	108	125	87	54	79	81	43	81	64	37	60	31	19	32	28	24	203	96	202	129	107	137	145	216	66	24	59	21	25	52	27
LOC100577302	38	83	45	33	96	46	127	96	42	36	49	95	107	86	98	125	58	65	58	62	37	88	72	42	45	33	17	18	30	28	192	99	153	113	82	116	108	142	58	11	39	18	35	45	8
LOC100577308	14	34	33	25	42	36	50	26	10	29	42	46	46	69	71	76	47	57	46	56	34	26	81	34	30	16	6	9	11	19	52	66	129	120	79	99	53	45	50	10	40	3	20	45	20
LOC100577320	70	168	202	150	205	154	206	118	39	177	210	226	216	236	269	218	223	196	167	177	187	273	201	138	134	70	65	57	90	79	134	244	488	294	276	352	223	163	151	57	101	51	55	88	62
LOC100577322	8	15	21	13	32	10	17	5	16	23	28	12	23	15	14	14	32	44	27	30	38	13	10	11	21	10	11	5	11	19	12	36	109	60	33	44	27	12	24	7	10	11	10	10	13
LOC100577324	22	43	45	38	53	43	53	18	28	53	81	67	85	69	55	50	107	109	85	86	88	99	87	27	77	50	28	33	40	41	28	83	176	121	116	150	98	71	95	29	51	27	28	49	34
LOC100577325	103	286	246	226	289	182	165	73	118	279	355	401	268	276	265	217	339	334	212	237	317	403	279	196	295	131	83	75	128	130	84	280	581	489	388	463	300	198	289	98	169	74	101	142	102
LOC100577327	0	2	2	1	0	1	3	0	1	4	0	1	0	1	0	0	8	0	5	5	1	3	1	0	0	1	1	2	3	3	1	4	8	4	7	2	0	1	2	2	2	0	3	3	2
LOC100577331	0	0	0	1	0	0	0	0	0	0	0	0	0	0	0	0	0	0	0	1	0	0	13	0	0	0	0	1	0	0	4	0	0	7	0	0	0	0	0	0	0	0	0	0	0
LOC100577332	19	25	45	44	34	20	37	16	8	43	67	33	63	56	43	26	67	114	45	99	130	60	48	29	48	19	18	14	27	47	19	89	168	112	100	129	76	30	73	31	29	28	41	49	36
LOC100577334	1	5	3	2	9	2	0	5	2	0	3	1	11	2	8	8	7	8	8	7	9	1	7	3	5	3	2	1	5	2	6	5	14	6	10	16	8	14	6	3	7	3	5	2	2
LOC100577335	34	75	67	55	87	51	59	29	25	56	95	123	76	70	54	55	113	61	64	71	47	71	76	53	70	44	25	20	44	37	69	90	181	154	102	125	85	106	86	15	54	28	37	34	24
LOC100577341	147	508	192	348	357	319	497	354	69	397	388	632	584	600	430	598	275	198	227	197	192	664	403	449	188	117	43	78	67	74	349	247	534	259	333	464	342	282	258	37	77	17	45	89	50
LOC100577342	16	30	31	29	65	39	55	20	23	35	22	59	84	61	53	68	47	50	51	38	51	39	45	24	36	24	14	8	20	21	76	53	91	83	48	81	80	99	35	10	27	11	15	21	18
LOC100577343	31	42	113	87	92	64	79	47	75	53	141	55	151	118	109	86	211	183	140	116	174	85	73	49	88	49	47	32	55	63	61	161	365	283	164	285	183	113	124	46	61	43	79	64	45
LOC100577344	23	65	63	66	80	68	108	64	18	53	80	90	96	110	85	107	93	94	75	79	71	111	89	59	73	35	23	26	40	31	102	92	206	130	139	156	118	93	83	25	45	15	24	61	17
LOC100577346	69	220	131	116	135	74	124	133	33	130	130	190	160	102	198	159	104	150	131	120	156	138	33	53	127	46	33	56	48	60	241	113	252	158	258	381	303	198	168	28	93	50	32	42	28
LOC100577347	44	112	92	94	70	87	118	46	58	141	120	147	125	145	115	106	136	152	113	109	166	112	153	123	82	56	38	32	40	46	73	197	202	161	111	222	240	160	166	62	41	43	84	50	28
LOC100577348	5	9	10	9	10	6	15	3	7	9	5	7	13	9	5	6	9	10	16	12	21	5	12	4	8	6	1	5	5	6	8	12	33	15	12	14	8	12	13	0	5	4	6	7	6
LOC100577351	17	100	55	67	103	97	61	27	29	74	87	127	114	106	68	97	110	84	65	68	41	130	90	82	80	36	35	30	47	27	78	73	163	107	105	96	78	87	69	31	70	39	41	38	18
LOC100577358	25	60	53	37	54	51	67	37	30	62	41	58	60	53	56	69	32	39	33	25	39	64	49	45	35	22	13	12	26	15	81	50	95	34	55	80	44	49	26	18	18	25	24	20	11
LOC100577359	2	4	18	2	5	5	1	2	3	29	6	47	0	15	2	3	6	4	5	7	5	0	3	3	0	0	2	0	1	0	4	5	9	13	0	0	0	4	2	1	3	1	3	1	0
LOC100577362	1	0	2	2	5	1	2	1	3	0	0	2	1	0	1	1	2	1	4	5	4	1	0	3	0	3	0	2	1	0	3	6	0	2	5	3	1	4	6	2	1	0	3	1	0
LOC100577363	5	13	11	10	11	14	6	8	1	16	13	18	16	15	15	9	14	26	16	6	18	28	16	15	4	3	2	2	1	4	6	11	34	18	25	21	18	23	12	3	5	6	2	11	4
LOC100577364	149	206	423	288	273	273	218	72	145	241	458	311	407	378	263	185	549	642	453	596	544	375	327	146	391	160	187	153	214	260	163	537	1135	829	664	867	441	213	520	195	216	239	311	284	223
LOC100577365	0	0	4	3	7	2	0	0	1	1	4	2	6	1	4	1	10	13	3	7	3	6	4	3	5	2	1	1	3	1	1	10	18	5	5	8	1	6	7	3	0	2	2	1	0
LOC100577367	39	115	133	130	130	139	122	43	56	141	209	185	184	225	106	96	264	282	227	255	240	188	198	76	221	68	99	94	143	94	77	287	448	418	319	428	248	114	262	99	152	139	181	123	83
LOC100577369	132	241	240	236	316	297	243	126	145	249	369	429	441	349	310	307	544	413	391	385	342	397	377	238	331	196	97	134	188	186	300	408	824	611	505	538	439	438	413	101	289	114	134	137	134
LOC100577376	84	181	313	239	262	319	276	125	138	293	386	318	393	449	324	256	425	528	391	403	522	324	288	226	319	117	111	120	126	156	167	450	784	448	516	563	533	189	381	70	111	64	118	166	104
LOC100577377	39	63	166	87	133	70	149	44	170	102	207	182	158	199	136	108	129	256	110	192	233	164	146	98	186	31	76	17	55	48	116	315	550	726	223	289	310	85	221	82	50	152	290	137	68
LOC100577378	151	333	196	190	307	206	294	226	276	255	252	357	274	310	325	348	243	227	299	241	209	362	364	227	232	129	55	71	121	106	392	302	649	471	371	393	357	480	225	40	172	34	69	130	91
LOC100577381	0	0	0	0	0	0	0	0	2	0	2	1	1	1	2	1	0	0	1	0	0	0	1	0	1	3	2	0	2	0	1	1	4	0	0	0	1	0	1	3	2	3	0	1	3
LOC100577382	0	4	3	4	8	7	2	3	3	3	4	12	19	15	9	9	8	7	9	5	7	1	5	3	7	8	1	2	7	4	5	9	34	24	14	12	9	17	8	3	2	2	5	4	5
LOC100577385	250	176	338	229	305	205	229	91	401	179	359	313	318	262	198	233	365	258	524	323	268	290	239	184	199	233	85	106	141	118	245	219	744	583	352	361	308	265	227	59	188	143	152	163	187
LOC100577386	19	88	63	49	68	80	88	69	38	63	88	103	102	114	97	102	95	93	100	98	86	107	77	70	92	62	24	42	53	38	82	138	222	181	148	204	151	101	70	27	60	34	47	57	25
LOC100577387	0	0	4	2	3	2	1	1	0	1	6	2	2	6	1	2	2	3	3	1	2	0	2	0	3	1	0	0	0	4	0	9	5	6	6	3	7	1	0	0	3	0	0	0	1
LOC100577393	84	136	318	240	194	139	174	35	138	210	361	247	364	336	169	111	371	521	374	460	532	333	290	96	507	85	185	138	177	292	69	500	960	646	719	755	391	127	492	205	141	166	196	332	282
LOC100577394	6	41	28	25	22	29	33	29	5	22	31	37	46	59	52	46	50	39	53	48	47	45	37	15	54	19	12	11	18	24	47	74	111	85	90	109	89	46	45	10	25	16	23	28	21
LOC100577396	0	0	0	1	1	0	0	1	3	0	0	0	0	1	0	0	1	0	0	0	2	2	0	0	1	0	0	0	0	0	0	0	3	2	1	2	0	0	0	1	0	0	0	0	0
LOC100577397	119	135	370	244	212	180	203	36	94	181	281	124	293	261	280	185	495	525	282	378	555	219	237	175	302	98	110	196	195	169	66	499	685	501	513	597	371	146	427	169	151	146	240	201	190
LOC100577401	52	82	172	136	176	158	159	89	59	114	167	213	314	232	168	145	326	325	318	343	270	213	161	90	358	121	122	115	209	156	188	290	679	630	448	590	263	222	253	128	221	148	236	221	122
LOC100577408	111	234	255	211	458	152	257	132	165	321	389	491	476	261	269	231	699	361	1344	1267	506	395	378	195	624	327	669	659	740	616	317	355	964	960	856	564	415	423	536	577	893	568	667	1408	532
LOC100577409	37	29	150	80	49	75	41	24	48	78	132	65	111	72	55	41	135	136	152	135	211	73	72	36	128	36	70	78	76	63	49	147	285	240	156	209	96	99	106	113	59	108	147	69	73
LOC100577410	5	19	28	23	54	27	27	12	6	15	23	18	56	26	8	13	38	35	22	23	22	16	25	13	10	15	1	13	11	9	6	21	23	35	28	37	33	13	22	6	16	7	11	11	7
LOC100577418	46	109	144	140	87	72	123	46	46	100	173	179	176	166	92	83	158	164	137	130	101	131	151	101	131	85	33	48	58	54	76	131	355	234	217	255	174	164	164	46	112	27	45	65	29
LOC100577423	19	34	31	20	40	26	31	28	28	15	37	43	38	51	35	30	55	24	29	23	28	20	29	17	22	22	5	7	19	10	33	44	65	50	53	57	40	36	20	20	23	13	25	24	17
LOC100577425	2	1	6	3	4	2	5	2	1	2	2	4	4	5	5	1	4	5	6	6	4	2	2	4	3	2	1	3	3	1	6	5	20	9	9	12	7	12	13	0	5	7	6	2	1
LOC100577430	88	234	189	150	228	210	223	124	120	222	270	426	341	361	295	300	553	423	503	402	360	293	364	195	1405	728	388	298	538	952	411	439	838	931	1904	695	559	1788	460	302	1084	240	336	1160	470
LOC100577436	0	5	6	2	6	1	5	2	1	1	12	0	8	2	9	5	4	2	7	7	7	4	1	2	6	1	5	3	4	2	2	8	12	7	11	8	5	6	2	3	6	5	15	1	3
LOC100577440	99	127	90	97	164	118	93	79	70	58	87	146	149	125	100	109	170	111	105	101	94	122	111	90	57	37	21	24	40	46	142	104	193	132	135	134	190	318	101	28	51	15	19	41	24
LOC100577441	1	1	0	0	2	3	2	0	1	5	0	2	1	3	0	1	0	0	0	1	1	0	2	0	3	1	0	0	0	1	0	3	4	3	0	8	9	6	1	0	3	0	1	0	0
LOC100577449	32	81	78	71	129	115	143	102	38	78	164	143	120	199	149	157	205	140	189	141	110	160	163	67	130	62	43	62	77	60	138	254	283	303	254	283	241	173	172	33	97	32	58	65	36
LOC100577450	17	121	87	52	112	43	80	34	8	70	79	115	82	100	106	106	75	45	80	59	48	124	83	60	67	44	16	29	38	40	48	68	127	122	107	100	79	62	64	16	53	35	23	22	26
LOC100577451	82	239	178	213	298	215	229	118	89	201	218	307	287	287	238	272	239	187	179	217	181	348	228	211	226	107	69	62	121	98	221	233	409	390	321	375	292	318	220	44	116	48	88	94	53
LOC100577452	49	151	89	121	157	91	124	81	40	123	158	205	160	202	222	178	246	207	200	237	218	188	184	113	136	78	44	62	120	83	106	216	493	337	336	302	298	161	237	55	167	80	133	96	67
LOC100577453	2	1	1	3	3	4	0	5	3	2	2	1	8	2	1	2	5	5	5	7	0	2	1	2	10	4	1	2	2	4	7	9	8	11	11	1	3	15	3	0	4	2	4	12	3
LOC100577454	65	183	116	106	211	96	148	112	64	178	125	236	253	209	207	222	172	171	137	132	120	232	149	99	164	66	55	51	81	71	157	162	300	211	193	303	181	191	132	46	117	37	66	95	41
LOC100577455	19	37	69	67	75	90	75	23	26	56	66	71	112	91	72	64	106	78	120	108	117	83	73	45	90	34	33	14	52	65	67	102	291	160	137	219	146	108	91	32	41	38	50	55	39
LOC100577456	228	493	2200	1396	643	485	561	165	465	854	1475	654	1138	935	744	551	739	1536	1376	1506	1549	1107	842	391	881	170	310	244	396	524	256	1805	3148	1999	2157	2379	970	389	1034	418	263	413	1029	454	382
LOC100577464	2	3	2	3	2	1	2	2	4	3	3	4	3	4	4	4	3	4	9	2	9	2	3	3	3	8	7	10	5	4	5	4	8	5	2	7	5	6	2	0	5	1	1	9	4
LOC100577466	46	123	69	71	156	120	171	169	37	105	90	199	243	213	164	237	140	84	136	99	58	158	145	94	134	74	22	34	40	43	227	153	251	186	170	232	235	275	131	25	87	33	32	68	26
LOC100577472	4	7	12	9	12	8	8	1	6	20	22	14	15	16	12	7	13	30	14	15	25	11	14	10	19	7	5	7	9	8	4	22	51	31	24	40	14	7	20	8	8	4	22	9	9
LOC100577481	43	153	136	89	146	85	116	73	84	109	100	173	144	167	195	172	128	121	115	108	108	166	126	87	87	44	42	31	73	60	113	159	268	146	160	263	120	137	108	44	80	28	52	69	35
LOC100577488	35	117	83	115	64	29	74	68	26	52	112	128	83	115	97	87	73	64	41	47	84	101	81	86	51	33	9	24	14	19	81	87	132	98	104	131	100	92	78	4	26	2	11	33	14
LOC100577489	2	1	0	0	4	0	1	1	0	0	0	0	0	1	2	0	1	0	0	0	0	0	1	0	0	0	0	0	0	2	0	0	3	2	0	0	0	0	1	0	1	0	1	0	0
LOC100577491	31	89	87	91	83	86	96	99	49	83	106	117	125	102	120	140	125	120	102	107	97	116	91	87	116	71	42	52	76	55	149	179	263	186	178	158	147	140	108	29	77	34	53	62	38
LOC100577492	5	2	20	9	16	10	8	4	2	16	31	18	44	14	7	4	30	49	47	94	69	22	13	6	43	11	11	7	19	21	12	51	66	56	70	74	15	15	44	18	15	20	24	20	25
LOC100577493	36	120	102	89	121	114	147	85	73	105	144	164	105	161	132	143	147	118	137	96	119	136	125	107	88	55	21	35	54	47	138	153	295	236	135	229	173	173	104	43	108	42	56	65	37
LOC100577496	2	6	2	2	4	5	4	0	2	0	0	4	5	3	2	4	2	6	5	4	11	7	8	1	3	2	1	0	1	6	1	4	16	11	5	3	5	1	2	0	1	1	4	5	3
LOC100577497	10	8	15	2	20	10	13	11	10	13	7	11	12	16	22	18	18	35	24	30	25	18	14	15	37	12	10	5	12	20	31	45	59	42	49	55	29	44	28	4	20	6	6	22	10
LOC100577498	735	1345	3517	3115	2383	2687	2580	712	1767	2225	4119	1586	4667	4467	3595	2478	5968	8066	4752	5458	8301	2887	2524	1458	4504	1111	1621	1345	2069	2144	1090	6611	8887	7273	8651	11119	6289	1869	4782	1356	1450	1050	1669	2763	1612
LOC100577499	15	32	24	20	34	19	37	28	10	24	15	46	37	58	51	68	34	14	15	24	12	56	41	20	24	10	3	7	9	14	28	27	38	32	37	45	46	34	29	6	9	9	7	12	9
LOC100577501	15	63	79	57	70	85	56	28	35	60	105	96	137	140	96	76	107	184	148	168	136	74	85	33	172	51	52	47	75	64	67	196	340	270	222	354	183	102	155	59	84	94	88	91	42
LOC100577504	566	1295	2010	1597	842	699	1544	600	657	1003	1542	617	1863	2284	1705	1510	2404	2585	1984	1741	3146	1726	1546	1339	1668	969	769	572	641	810	1199	2895	4814	2879	2613	4542	3801	1749	2399	661	745	548	575	822	659
LOC100577506	77	280	172	144	261	141	218	198	78	189	164	417	262	332	321	397	188	133	163	154	126	393	184	179	139	80	41	44	66	75	240	253	431	259	229	324	244	273	169	26	91	28	49	80	32
LOC100577507	0	0	1	0	1	2	2	0	0	1	1	1	0	0	1	0	0	3	0	2	0	0	1	0	3	1	0	2	0	0	0	1	5	2	0	4	1	1	5	1	2	0	1	3	0
LOC100577510	0	0	0	0	0	0	0	0	0	0	0	1	0	0	0	0	0	0	0	0	0	0	0	0	0	0	0	0	0	0	0	0	1	0	0	0	0	0	0	0	0	0	0	0	1
LOC100577513	14	26	32	27	45	49	66	17	10	27	44	34	39	47	35	40	39	32	52	27	45	32	30	48	26	8	14	8	16	17	61	39	95	76	60	54	55	39	17	15	28	8	12	19	14
LOC100577515	25	25	69	42	76	61	29	15	23	56	80	52	77	67	38	26	71	72	74	73	66	54	49	45	81	11	19	23	33	32	29	59	164	111	73	91	67	99	62	24	28	36	46	37	15
LOC100577516	0	9	2	5	4	3	2	6	3	2	11	12	6	6	5	3	14	14	7	8	1	7	3	3	0	1	5	4	3	3	7	4	15	13	8	8	9	8	5	4	2	2	2	2	3
LOC100577517	19	30	96	47	47	53	33	22	37	38	75	30	109	83	34	28	132	173	116	131	135	38	36	12	86	36	44	32	42	59	45	133	245	143	159	154	85	106	92	41	32	44	81	79	52
LOC100577519	65	377	188	173	368	183	223	242	92	256	276	431	267	288	293	364	193	138	186	123	120	348	268	247	146	96	42	53	64	61	222	223	391	224	246	308	213	305	154	39	133	32	40	94	36
LOC100577520	39	135	116	147	164	135	193	80	58	161	161	227	227	269	234	234	199	198	194	170	151	260	173	133	199	107	88	69	102	82	86	234	309	243	206	299	290	147	173	69	138	109	102	73	72
LOC100577521	5	3	1	12	5	11	13	4	10	6	5	10	15	9	3	10	18	19	22	15	5	28	24	15	17	11	7	2	18	1	8	18	65	16	52	28	16	16	22	11	18	9	13	0	2
LOC100577522	10	6	21	12	28	9	12	1	11	6	29	2	34	13	15	9	56	42	33	52	56	13	13	7	76	12	28	21	27	42	10	49	121	67	129	48	24	30	12	28	13	8	15	51	46
LOC100577525	36	85	111	84	109	135	101	70	43	109	166	158	145	154	119	128	260	206	199	241	162	141	128	94	189	81	65	73	88	99	124	209	360	314	304	276	219	156	203	69	112	62	65	104	52
LOC100577527	3769	4146	12144	8392	19755	22637	4983	7756	5267	2151	4386	7497	14142	6308	5404	6046	7794	8231	7880	9802	11031	7182	13959	19088	40463	23240	16149	11808	16059	16966	4517	3442	18691	29334	58577	11450	7027	77694	3119	7771	25051	4516	8257	29276	12489
LOC100577530	80	116	266	234	124	252	150	36	48	183	437	129	363	294	198	135	554	562	252	397	753	313	274	137	297	93	120	89	124	224	121	600	927	524	494	694	518	170	574	151	136	78	125	143	156
LOC100577533	46	134	99	86	145	134	174	99	31	164	117	189	243	238	186	225	179	144	166	103	124	258	177	115	132	67	37	49	64	44	168	191	264	212	186	281	267	165	123	27	112	34	52	43	42
LOC100577537	3	14	37	10	3	42	32	3	14	29	17	48	9	24	15	17	22	24	4	8	12	16	20	5	8	8	9	3	9	7	3	20	40	19	6	23	15	10	14	6	2	7	6	7	4
LOC100577541	2	0	0	0	8	2	1	2	0	1	10	0	14	1	3	6	6	2	2	10	1	4	5	4	6	4	1	2	5	9	6	6	15	14	7	5	2	0	2	2	3	3	0	10	2
LOC100577543	7	41	45	29	18	25	22	3	14	29	26	33	28	38	15	14	30	47	24	24	51	22	19	20	28	8	10	1	8	5	8	48	65	30	32	60	27	14	32	11	9	7	4	11	8
LOC100577544	10	17	12	9	12	5	14	8	4	13	24	23	21	6	7	10	12	9	6	18	8	4	5	7	13	10	3	4	2	2	28	9	39	7	11	33	25	25	11	3	1	3	1	4	3
LOC100577546	29	99	68	52	120	76	79	38	54	112	134	167	129	113	111	99	142	99	84	72	81	114	129	57	78	42	25	39	48	35	80	118	169	155	118	204	147	150	127	24	100	30	22	38	25
LOC100577548	17	16	35	28	13	14	18	3	13	32	25	24	28	31	19	21	27	42	22	17	61	52	15	6	21	2	2	3	14	14	9	30	77	43	33	80	34	12	25	6	11	5	10	14	2
LOC100577551	47	94	117	106	123	147	151	108	104	94	150	103	113	141	124	155	234	127	154	133	188	94	177	103	114	65	58	42	42	77	252	210	474	200	234	271	220	248	209	43	67	32	43	99	38
LOC100577552	13	52	91	67	76	70	50	20	11	105	125	85	105	127	86	65	166	195	121	225	143	108	65	39	151	47	63	40	76	65	32	180	307	293	261	316	121	42	158	61	59	45	84	85	48
LOC100577553	62	103	88	79	133	81	165	110	68	79	99	170	127	155	149	187	91	62	91	76	75	154	127	85	68	40	23	25	47	41	153	125	209	105	124	155	115	149	79	17	75	18	21	37	27
LOC100577561	17	50	43	38	81	74	64	51	26	60	55	53	93	70	68	68	69	64	75	70	73	81	76	35	64	28	19	17	53	20	74	93	152	99	76	109	78	81	68	24	48	43	46	40	32
LOC100577562	2	1	1	2	0	0	5	1	0	1	3	3	2	2	1	1	2	0	3	3	2	5	1	1	6	1	3	3	2	4	0	7	4	5	1	9	2	7	6	6	3	5	6	1	0
LOC100577569	6	13	36	17	17	18	27	6	7	18	25	17	30	14	6	3	23	41	26	44	27	13	21	12	38	8	15	6	4	16	13	42	106	38	34	78	36	15	29	6	6	14	16	13	11
LOC100577573	0	1	3	0	0	1	0	6	0	3	0	2	0	3	1	2	0	0	0	1	0	0	3	0	0	1	0	3	0	2	0	6	2	1	0	2	1	3	1	0	3	0	0	0	0
LOC100577574	41	150	157	136	158	139	154	60	54	143	152	214	210	180	165	134	265	214	232	182	179	223	199	144	245	117	85	124	128	101	92	220	489	416	367	424	259	262	172	84	217	66	117	154	78
LOC100577575	125	332	213	194	355	270	343	238	113	284	257	463	413	468	322	437	359	247	239	209	227	456	305	276	216	126	55	60	102	90	416	263	466	407	300	409	346	361	268	36	124	55	48	91	49
LOC100577576	56	105	135	149	139	77	120	55	61	150	169	105	135	184	103	102	192	127	259	179	254	126	143	119	82	43	41	59	69	51	129	186	215	138	233	256	355	160	157	21	57	32	47	71	47
LOC100577577	1	0	0	0	0	0	0	0	0	0	0	0	0	0	0	0	0	0	0	0	0	1	0	0	0	4	0	0	0	1	0	0	0	0	0	0	0	0	0	0	0	0	1	7	0
LOC100577578	286	424	569	541	579	598	597	291	256	460	711	758	712	675	522	474	864	815	736	734	715	565	547	414	731	255	222	234	375	297	523	708	1652	1166	960	1117	851	794	635	265	380	283	348	349	276
LOC100577579	32	256	115	133	220	162	141	83	23	196	204	286	217	225	181	179	175	130	119	113	110	394	193	145	109	65	43	41	65	53	113	127	281	153	157	177	169	136	118	37	118	42	50	63	50
LOC100577580	24	52	42	26	57	36	44	42	14	38	54	46	61	64	58	58	71	58	58	46	49	48	41	20	51	31	14	24	23	21	38	78	138	102	86	129	48	74	65	17	45	19	19	35	24
LOC100577582	145	450	269	240	353	299	340	269	284	392	466	536	483	537	477	525	544	466	382	406	430	606	563	386	420	192	119	145	182	166	468	533	916	719	483	664	755	605	471	111	297	74	124	169	103
LOC100577584	7	4	9	7	8	3	5	1	1	4	3	8	9	2	4	3	12	5	6	15	9	11	8	3	15	3	6	9	4	6	9	11	20	23	27	15	10	13	4	12	4	10	7	8	7
LOC100577585	2	2	1	3	2	1	0	0	0	0	0	1	0	0	1	1	1	0	1	1	1	2	2	0	3	5	1	3	1	2	0	1	0	1	3	2	1	3	2	1	3	1	0	2	2
LOC100577587	86	183	306	245	306	220	246	105	122	243	304	338	475	424	341	287	501	670	566	609	565	398	375	155	629	198	199	168	270	256	292	764	1470	857	1040	1209	578	367	547	220	259	186	266	350	217
LOC100577590	0	0	0	3	0	0	0	2	0	0	0	1	1	3	1	1	1	2	2	0	7	0	0	0	0	0	0	0	1	0	0	4	3	1	1	1	2	0	1	0	0	2	0	0	1
LOC100577594	69	140	104	106	152	117	122	60	68	136	200	192	122	132	179	161	157	110	114	121	141	140	137	110	130	65	37	51	63	76	84	140	296	223	162	243	158	160	132	43	97	39	52	88	42
LOC100577596	1	2	1	1	1	6	0	0	1	1	3	1	5	2	2	2	0	5	9	8	2	2	1	0	1	4	5	1	6	1	1	6	1	5	2	2	2	1	0	2	8	3	4	8	5
LOC100577598	3	9	8	13	7	2	12	5	0	7	13	9	30	14	20	7	8	16	12	20	30	17	14	11	4	2	3	7	3	4	5	31	27	16	9	28	17	4	9	0	1	2	3	3	1
LOC100577600	10	12	16	13	34	19	9	7	4	19	29	18	43	14	5	6	44	35	48	49	31	18	17	6	42	7	12	7	18	12	13	40	64	38	45	58	40	20	19	9	9	15	22	20	10
LOC100577602	31	122	88	129	143	107	155	75	53	92	100	183	215	200	184	181	234	174	168	156	188	170	164	87	133	58	41	64	72	75	105	263	444	272	286	433	244	184	186	37	109	50	66	81	39
LOC100577603	71	123	288	279	172	342	283	72	63	321	467	95	431	363	286	230	591	834	422	516	939	311	393	172	436	91	169	98	154	226	283	704	875	461	745	928	714	207	543	192	153	206	237	246	196
LOC100577605	0	0	0	0	1	0	0	0	0	0	0	0	0	0	0	0	0	0	0	1	0	0	0	0	0	0	0	0	0	0	0	0	0	0	3	0	1	0	0	0	0	0	0	0	0
LOC100577606	47	176	107	108	159	105	186	129	50	113	95	186	136	213	184	177	80	76	78	77	74	205	157	122	71	62	25	25	54	42	135	110	225	155	136	199	158	140	90	17	33	25	45	49	26
LOC100577607	324	1043	520	453	674	385	699	625	291	590	712	1063	496	712	843	851	738	493	422	330	376	794	660	394	311	236	106	109	131	150	812	511	1083	630	390	737	660	607	570	82	221	74	81	155	100
LOC100577610	285	629	402	419	615	488	562	412	332	521	591	831	655	668	647	789	693	522	594	545	440	770	598	446	469	305	178	192	243	224	715	558	1230	834	635	840	701	896	513	169	398	154	230	295	144
LOC100577614	6	9	16	26	15	11	21	23	4	8	13	13	17	18	20	29	13	12	6	10	23	9	16	13	6	4	1	3	6	8	17	13	65	23	8	17	13	31	6	6	3	3	1	7	0
LOC100577620	10	19	13	8	11	18	18	13	5	12	20	18	12	15	16	19	33	25	15	11	18	22	18	16	15	10	7	5	4	15	10	41	49	21	22	51	32	7	25	2	8	6	2	7	6
LOC100577623	282	1021	755	523	1031	421	578	258	287	977	879	1270	876	1123	1041	828	726	672	525	588	567	1143	771	439	544	202	204	157	243	227	186	911	1650	965	987	1568	638	371	593	139	368	132	224	307	135
LOC100577629	16	117	59	87	105	68	101	79	13	68	73	113	130	104	99	110	72	79	65	87	95	95	70	98	45	23	22	18	20	13	88	122	141	125	136	147	124	96	93	15	33	24	53	33	20
LOC100577632	25	27	67	55	45	54	64	62	83	22	52	16	108	72	40	49	107	98	81	94	103	19	63	26	98	40	37	18	27	43	179	86	251	122	115	132	144	250	74	20	20	21	37	62	33
LOC100577634	0	0	0	0	0	0	0	0	0	1	0	0	0	0	0	2	0	0	0	0	0	0	0	0	0	0	0	0	0	0	0	0	0	0	0	0	1	0	0	0	0	0	0	0	0
LOC100577635	3	3	1	6	7	0	2	0	2	4	2	0	5	5	2	2	6	5	4	17	13	3	4	3	7	0	1	6	5	4	1	9	16	11	11	10	0	0	6	6	2	6	1	3	0
LOC100577636	7	24	38	17	23	22	9	5	8	28	31	20	34	36	26	17	46	58	36	34	45	16	19	11	26	8	8	7	7	7	6	51	48	39	52	120	55	20	35	10	14	4	13	15	9
LOC100577638	140	240	360	294	240	276	256	91	109	329	442	449	405	622	421	327	621	539	466	323	616	320	316	270	331	110	143	137	214	171	84	526	1012	972	499	1082	596	279	439	169	173	178	233	220	173
LOC100577640	6	26	23	16	40	14	16	18	9	31	29	36	43	30	38	32	38	32	39	30	31	35	49	13	38	23	19	8	18	26	25	52	91	53	60	112	27	37	49	5	14	20	15	8	8
LOC100577641	1040	2241	2011	1914	1838	1671	1958	852	1726	1071	1594	2832	1706	1996	1588	1732	2061	1500	1625	1255	1251	2015	1605	1668	2348	1209	675	807	1128	1063	1794	1288	3640	2811	3071	2471	1992	4380	1274	574	1255	506	684	1104	868
LOC100577644	154	331	133	217	348	196	300	249	207	263	259	460	468	531	303	431	270	202	198	199	208	408	265	276	177	100	45	55	85	65	392	219	460	303	217	350	436	324	181	35	121	55	47	91	43
LOC100577648	136	363	133	155	317	173	278	276	128	211	248	387	270	328	280	384	194	182	198	121	135	332	225	166	145	93	45	48	100	72	292	215	385	357	179	359	340	320	172	34	112	31	51	85	48
LOC100577649	18	56	41	47	82	52	64	47	18	60	52	85	105	105	94	82	110	111	130	103	83	69	69	26	108	45	23	37	73	47	88	102	244	211	175	237	131	103	127	40	96	32	46	59	41
LOC100577651	98	257	175	157	308	205	215	173	142	251	242	381	412	344	279	358	351	236	253	241	208	381	297	194	254	109	49	80	111	95	293	297	474	400	346	419	419	411	228	57	142	71	73	105	58
LOC100577655	2	9	7	4	5	2	7	1	0	4	4	2	4	6	1	1	5	6	9	5	10	4	6	2	5	1	1	0	1	1	3	5	13	5	7	7	2	7	1	0	3	1	0	3	0
LOC100577656	4	3	8	3	6	3	0	1	7	4	3	2	9	4	5	5	8	12	11	9	11	6	6	2	6	2	8	2	3	6	3	7	11	21	3	3	4	5	5	7	3	2	7	4	5
LOC100577661	74	327	182	159	303	204	299	220	110	223	246	381	418	445	281	366	296	204	251	237	279	435	375	245	241	118	61	84	87	67	350	315	522	338	278	329	402	309	286	30	136	52	62	81	54
LOC100577667	15	25	25	29	19	9	43	15	8	17	36	50	25	16	15	13	37	38	30	43	39	50	55	17	33	23	8	15	26	8	49	55	150	50	88	91	35	91	26	12	25	9	19	25	11
LOC100577669	96	134	333	366	326	254	259	62	163	308	454	203	902	299	297	235	670	761	734	733	902	421	352	202	413	219	234	238	467	393	159	624	1028	673	661	727	660	289	508	301	332	738	608	354	400
LOC100577670	7	18	17	16	27	33	21	10	7	18	35	34	27	32	16	12	24	25	23	32	24	27	21	17	60	23	24	9	10	17	12	22	56	53	57	33	11	43	18	22	17	23	16	26	11
LOC100577671	0	0	1	0	2	3	0	0	1	0	0	0	0	0	0	0	0	3	0	0	2	0	0	4	1	0	1	0	0	2	2	5	0	2	1	2	1	1	1	0	1	0	0	0	0
LOC100577672	37	99	77	86	98	86	93	53	33	96	111	149	146	108	99	96	183	151	151	134	136	134	97	67	122	62	57	48	75	66	98	151	305	210	203	235	163	143	130	57	98	62	104	111	45
LOC100577673	206	571	306	382	723	323	639	461	145	349	401	835	815	645	615	877	593	356	471	404	377	492	413	261	370	217	103	105	170	133	845	502	1178	853	662	683	720	946	441	84	253	129	157	137	113
LOC100577675	51	146	116	138	134	160	159	115	39	84	179	224	247	255	212	228	240	174	236	176	168	199	166	136	145	119	60	55	87	71	171	247	476	619	329	333	267	279	238	36	117	57	77	91	66
LOC100577676	11	43	26	19	57	25	51	33	16	21	30	52	41	69	47	55	34	19	28	27	17	63	29	29	32	15	5	12	17	17	60	26	64	48	56	50	32	64	25	7	15	7	11	15	8
LOC100577678	2	2	1	8	1	4	6	2	4	1	1	1	5	7	14	10	3	1	0	19	8	9	4	12	1	1	0	10	20	2	3	28	3	4	7	8	1	4	1	1	12	1	4	3	0
LOC100577679	10	28	20	20	58	19	34	28	18	46	23	51	46	46	39	50	29	27	43	33	26	42	34	20	37	19	14	12	22	14	39	46	71	71	60	88	70	35	40	15	41	21	30	15	6
LOC100577680	3	1	4	5	4	5	2	3	7	2	6	3	2	1	0	0	4	3	1	4	1	3	0	0	6	0	0	0	2	1	4	3	12	2	2	4	3	3	0	1	0	3	2	3	0
LOC100577681	7	31	36	28	55	41	56	25	7	52	51	59	107	69	69	60	65	62	89	70	65	58	74	26	68	51	25	40	55	17	43	111	128	135	88	117	97	65	69	18	56	26	29	22	30
LOC100577682	55	87	147	125	134	69	84	42	46	102	178	122	233	136	188	140	264	254	170	253	234	158	114	95	185	94	71	77	119	138	132	179	473	351	283	305	210	198	128	75	104	101	98	143	101
LOC100577683	12	16	12	7	23	9	16	7	2	16	18	18	37	9	17	34	27	8	14	11	6	25	17	20	13	8	0	2	6	8	37	10	27	31	19	22	21	45	12	4	7	3	1	4	6
LOC100577687	60	107	156	158	143	193	139	69	27	144	216	164	193	184	123	116	216	223	197	223	215	168	142	90	221	75	56	69	135	96	111	203	392	332	276	341	241	162	162	85	120	117	120	127	88
LOC100577689	19	65	45	73	84	55	65	56	28	65	68	98	102	95	108	97	80	96	76	101	75	99	85	52	57	40	22	32	41	42	53	112	153	166	108	162	115	89	79	16	63	22	31	22	25
LOC100577690	19	125	48	79	105	66	82	61	8	99	69	130	103	90	77	91	70	42	48	48	50	161	93	80	75	29	22	23	23	36	53	71	132	98	131	93	76	91	54	8	35	30	24	36	18
LOC100577692	9	15	47	27	19	15	13	2	16	12	46	17	28	43	32	26	36	68	27	29	77	39	19	9	30	18	17	8	17	16	18	48	90	69	61	76	37	14	30	21	7	6	18	10	30
LOC100577693	149	445	399	370	704	370	612	357	154	297	405	834	823	822	663	843	770	750	663	609	673	670	508	325	770	381	180	163	215	317	1032	965	2279	1822	1367	1436	1147	2004	984	104	317	75	91	352	229
LOC100577694	6	25	53	31	58	35	12	5	14	35	51	41	25	30	26	21	49	49	62	47	42	40	11	16	31	5	9	10	13	6	4	28	84	44	42	57	37	11	33	7	13	15	26	15	7
LOC100577696	3	0	1	2	3	1	3	1	0	8	4	2	10	0	2	3	6	7	3	5	5	0	1	4	8	0	2	0	0	1	1	7	19	6	8	4	1	3	2	0	1	1	2	3	1
LOC100577697	30	37	99	108	61	53	57	21	40	57	88	93	127	64	39	39	108	145	124	182	193	100	70	42	126	28	68	63	72	75	49	137	295	234	210	115	64	58	121	69	38	78	119	98	89
LOC100577698	0	1	1	0	0	0	0	0	0	1	1	0	0	0	0	0	1	1	0	0	1	0	0	0	0	0	0	0	0	0	0	0	0	0	0	0	1	5	0	0	0	0	0	0	0
LOC100577699	317	825	411	353	907	477	526	482	238	450	463	975	539	499	872	935	692	380	572	402	322	797	509	408	364	279	111	142	258	142	701	468	1113	910	723	668	620	937	481	53	300	75	108	208	102
LOC100577702	51	140	107	91	192	104	153	136	59	140	158	174	192	211	140	189	111	98	160	111	114	153	154	111	126	67	44	48	71	63	205	164	274	183	188	158	174	206	102	34	92	67	66	72	23
LOC100577707	104	410	425	428	472	420	456	250	99	379	526	484	585	549	416	397	612	548	611	584	558	499	483	321	546	256	177	153	241	220	365	594	1436	1001	825	902	653	411	507	176	314	189	270	325	182
LOC100577711	7	37	7	15	33	14	17	23	4	9	10	17	34	26	24	15	16	13	8	8	16	17	16	14	9	10	3	5	9	2	20	24	46	15	24	42	18	27	23	2	14	5	4	6	5
LOC100577712	14	78	93	20	35	96	138	47	201	43	42	125	18	77	52	94	52	58	146	178	43	38	116	19	96	57	46	29	32	54	61	72	586	282	164	113	108	150	153	32	116	22	45	238	51
LOC100577715	0	0	0	2	1	0	1	0	0	0	1	0	2	0	0	1	0	2	2	2	0	0	0	1	1	0	0	0	1	0	0	5	2	4	1	3	0	0	1	0	1	0	0	0	0
LOC100577717	17	32	78	63	36	28	49	24	26	44	48	29	68	52	46	49	52	58	71	64	99	28	46	50	60	22	25	26	30	28	26	67	223	102	76	110	81	56	61	27	35	34	32	30	18
LOC100577719	12	21	41	26	33	24	29	10	13	31	33	25	66	39	15	26	51	54	44	86	64	36	37	18	49	31	24	23	52	15	21	55	140	58	60	96	50	45	73	57	49	226	280	41	35
LOC100577722	12	30	25	15	32	16	30	22	12	25	17	36	25	30	24	32	16	16	11	15	12	37	25	16	7	5	3	3	6	8	32	15	35	27	20	30	30	28	14	3	13	5	5	9	3
LOC100577724	24	101	63	50	88	57	63	33	27	92	84	80	84	105	73	71	87	69	67	38	62	89	64	62	65	33	24	28	31	25	52	89	153	124	74	100	116	74	59	27	53	22	17	34	21
LOC100577725	2644	4656	2789	1176	4008	3380	2800	2495	1410	2480	3770	5706	1430	1559	2088	3207	2354	1291	2607	2162	881	2723	1802	1494	1492	1615	499	921	1734	796	3679	1038	5816	5237	1980	1905	1547	5591	1490	288	1929	586	879	1552	878
LOC100577727	50	89	39	55	72	77	78	79	44	47	92	114	82	87	72	65	67	42	50	75	38	87	71	72	38	38	14	16	34	23	114	44	110	94	76	62	57	116	42	16	44	14	25	35	14
LOC100577735	100	125	126	93	117	148	195	146	114	105	169	184	241	235	193	215	281	233	308	255	224	155	199	106	228	105	76	88	139	118	418	277	699	433	375	463	378	500	245	47	127	91	102	150	80
LOC100577739	78	156	200	118	298	208	287	224	134	132	166	237	343	297	345	345	398	418	418	374	309	209	235	97	362	140	129	110	189	171	601	479	985	661	511	715	553	679	337	131	178	147	205	209	113
LOC100577742	15	70	55	50	57	48	64	28	11	68	90	68	110	88	54	43	118	137	96	114	136	97	74	33	100	50	36	34	51	54	49	132	208	193	144	159	110	63	110	37	82	61	63	54	56
LOC100577743	2	3	1	1	4	1	1	0	3	1	3	0	2	4	1	0	2	0	0	16	13	2	3	1	2	1	1	5	7	0	2	5	5	8	10	1	6	0	4	0	5	0	3	3	1
LOC100577746	56	135	146	146	137	153	160	110	58	175	212	201	204	262	204	176	281	274	242	239	246	284	236	141	264	104	70	103	154	104	135	289	536	432	282	533	360	183	212	83	207	101	110	129	79
LOC100577748	27	118	68	117	105	49	78	56	29	55	123	114	69	85	86	111	37	50	53	38	54	97	77	72	47	30	11	18	27	30	52	57	167	81	87	82	57	127	33	9	27	16	18	42	13
LOC100577749	1	0	1	0	1	0	0	0	0	2	0	0	0	0	0	2	0	2	0	0	2	0	0	0	1	1	0	3	0	2	0	0	6	0	0	4	0	1	1	0	1	0	0	0	1
LOC100577751	11	9	16	16	26	14	12	9	7	12	21	9	19	12	9	11	11	15	10	16	9	15	13	13	12	7	1	2	5	6	12	13	29	21	22	19	18	11	9	1	2	8	10	4	2
LOC100577752	0	1	4	10	2	6	2	0	2	5	9	6	9	13	8	6	4	8	8	10	10	1	4	3	4	1	1	1	0	2	0	5	7	6	10	14	5	2	7	2	4	0	1	2	3
LOC100577753	64	208	192	120	187	117	178	114	61	197	215	246	200	229	212	213	261	232	200	206	179	274	231	148	210	129	88	81	99	118	156	248	508	420	286	397	277	197	250	76	137	87	109	161	86
LOC100577754	1	6	6	5	5	5	10	3	0	3	2	4	6	8	18	13	2	1	4	2	5	4	4	3	5	2	1	0	1	2	3	18	8	4	1	10	7	4	6	1	0	2	1	4	0
LOC100577755	0	0	1	1	1	0	1	0	0	0	0	0	1	2	0	0	1	0	2	0	0	3	1	1	2	0	0	0	0	1	1	2	1	5	2	6	1	0	2	0	1	2	1	1	0
LOC100577756	9	37	37	21	47	21	32	14	14	27	33	37	58	33	31	31	33	45	30	33	33	38	41	20	36	16	11	4	11	12	27	53	94	67	80	100	37	34	31	16	18	20	17	15	8
LOC100577758	3	4	18	3	13	4	20	7	5	7	11	14	11	4	21	23	11	6	14	20	16	9	10	10	10	7	4	4	5	3	8	14	55	16	13	24	17	21	10	5	9	4	2	5	3
LOC100577759	19	10	13	7	21	16	18	10	6	18	15	20	21	35	14	13	23	30	42	33	43	17	19	10	21	3	2	4	9	12	25	24	58	34	62	35	29	20	12	6	14	9	6	8	9
LOC100577763	88	215	200	169	327	247	382	236	140	139	201	282	371	353	414	465	384	369	429	387	321	225	227	146	358	151	76	77	123	173	561	563	951	1057	542	775	488	507	312	97	177	104	128	225	111
LOC100577764	295	560	553	490	659	640	453	209	373	493	824	830	781	734	479	391	938	770	766	762	752	694	646	489	740	326	288	308	448	411	364	724	1615	1383	1053	1048	939	801	694	247	584	347	418	455	313
LOC100577766	12	38	55	50	65	64	75	30	10	55	84	70	141	102	75	63	148	148	167	189	148	77	101	28	172	43	38	57	66	62	59	148	220	267	201	253	148	93	136	48	75	51	58	68	45
LOC100577769	71	72	129	97	143	76	66	33	74	104	141	79	130	118	58	50	131	212	132	114	180	87	91	58	144	34	66	35	49	55	39	150	312	172	161	228	147	51	138	45	55	59	66	69	58
LOC100577771	41	70	97	98	99	96	117	49	51	108	143	166	154	159	91	104	209	181	113	120	152	138	111	99	90	42	45	45	66	42	115	174	371	221	191	197	192	223	164	54	75	68	88	58	27
LOC100577772	0	1	0	2	2	0	0	1	0	0	2	0	1	1	1	0	1	0	1	0	0	0	6	2	0	2	0	0	0	1	0	1	3	1	3	6	1	5	1	0	0	0	1	1	0
LOC100577777	190	103	103	53	24	78	162	51	14	30	259	154	114	225	147	147	316	341	105	77	158	67	57	65	71	27	30	13	37	28	59	93	88	201	34	615	610	94	168	29	70	14	17	35	12
LOC100577778	2	3	13	15	5	11	3	4	5	12	13	8	20	7	0	0	13	31	16	37	35	8	10	3	21	1	8	6	8	14	2	22	50	39	31	30	10	5	19	6	8	10	12	10	15
LOC100577783	11	34	40	61	37	8	24	1	9	28	56	50	92	68	44	32	77	66	34	53	128	53	56	16	18	4	4	5	16	18	13	74	105	33	90	96	121	20	106	11	10	21	40	11	9
LOC100577784	48	97	101	111	99	115	127	109	80	104	97	196	175	226	191	232	137	134	154	119	114	155	140	79	150	77	59	48	74	72	244	227	325	263	219	348	224	248	141	40	92	59	59	105	42
LOC100577787	2	0	0	2	0	0	2	0	0	1	0	0	3	0	1	0	1	0	1	0	3	1	2	2	5	1	0	0	0	0	3	1	2	0	3	2	0	3	1	0	1	1	1	2	3
LOC100577788	16	64	45	27	56	32	58	54	38	40	41	64	59	53	74	64	53	32	36	39	43	56	34	44	21	30	5	11	19	20	59	60	84	54	55	83	72	100	43	4	24	3	8	17	5
LOC100577795	63	121	146	201	274	197	142	67	50	170	322	237	310	174	164	143	367	421	184	251	316	217	195	168	266	90	60	115	110	110	105	272	530	296	319	345	250	219	181	48	103	23	40	108	97
LOC100577797	21	56	34	30	41	35	72	42	13	42	51	99	56	82	73	81	41	15	22	18	23	104	52	46	22	13	9	4	14	6	52	35	82	36	40	51	37	49	32	4	11	3	5	9	10
LOC100577798	8	19	37	12	17	21	22	29	5	20	15	20	26	20	20	16	28	31	17	37	33	31	15	11	22	5	8	2	7	8	15	35	59	39	40	45	20	27	27	6	6	5	3	12	12
LOC100577801	35	63	101	84	46	86	74	25	48	82	89	46	111	95	80	61	120	145	138	144	119	72	77	49	127	39	72	45	88	75	39	137	342	157	177	226	118	64	151	72	63	131	171	95	62
LOC100577803	14	94	29	46	86	55	66	65	25	52	73	133	84	103	104	109	48	44	48	45	25	115	73	67	32	24	12	9	20	23	40	64	92	81	57	119	55	77	43	5	32	3	12	16	12
LOC100577805	6	9	11	5	8	13	10	11	7	7	5	8	15	7	16	15	11	9	21	13	17	12	13	8	11	11	3	10	10	8	17	17	35	17	30	33	17	20	34	2	9	11	7	5	6
LOC100577809	18	148	71	57	95	57	93	77	19	93	72	137	107	130	144	147	65	53	48	35	55	117	100	53	58	27	15	18	30	33	63	87	159	70	93	133	112	65	55	13	41	10	15	26	19
LOC100577810	20	29	36	42	43	25	37	10	8	25	41	25	28	47	22	24	50	57	63	62	66	21	22	23	59	20	20	20	23	25	54	54	196	85	88	75	73	59	46	16	18	7	9	22	22
LOC100577815	21	34	18	24	31	21	23	6	9	17	13	6	22	40	59	32	16	58	46	24	27	17	13	18	42	26	4	1	13	16	5	55	38	55	18	50	49	22	34	6	12	9	5	14	19
LOC100577816	19	128	114	79	140	118	132	97	60	101	142	147	194	178	174	179	162	171	169	171	187	136	133	76	164	73	59	49	90	74	148	311	448	291	257	389	251	167	164	46	91	40	63	108	52
LOC100577817	0	2	0	0	0	0	0	2	1	0	0	4	0	0	0	0	1	2	1	0	0	0	0	0	0	0	1	0	1	1	1	0	1	0	0	0	1	0	0	1	2	2	7	0	0
LOC100577819	2	9	20	34	20	3	1	6	58	4	20	2	41	0	16	9	3	16	24	63	71	7	11	53	117	54	24	13	72	114	3	3	25	76	36	38	3	23	2	0	30	8	11	298	81
LOC100577823	59	277	143	108	167	139	164	140	88	163	150	274	229	205	201	241	154	137	136	161	115	244	221	140	92	57	48	38	38	50	213	153	315	157	152	216	233	199	132	19	62	12	26	70	31
LOC100577825	0	7	2	7	4	8	10	3	3	5	6	8	10	2	9	7	7	10	7	6	8	12	7	5	8	12	1	5	2	1	13	6	19	5	6	3	9	15	4	4	9	12	13	7	0
LOC100577827	4	3	1	3	5	2	9	6	7	1	5	2	1	3	6	2	8	5	7	8	9	11	1	1	9	7	3	7	7	4	9	0	11	10	17	5	9	10	3	2	5	2	1	7	7
LOC100577829	0	1	0	0	1	0	2	0	0	0	1	0	0	0	0	0	0	0	1	0	0	1	0	0	0	1	1	0	2	0	0	0	1	0	0	0	0	0	0	0	2	1	4	1	0
LOC100577833	185	257	277	195	529	437	753	479	263	433	1094	433	528	509	343	397	500	356	946	626	254	753	504	238	787	418	266	298	188	616	672	366	907	1677	790	969	524	865	394	148	431	46	40	493	252
LOC100577836	24	88	59	64	97	72	83	51	21	82	65	149	150	130	103	126	86	72	48	95	65	142	102	63	71	36	19	19	30	29	62	95	174	125	102	159	114	89	68	20	71	25	24	48	11
LOC100577839	0	8	1	1	2	1	0	0	1	3	2	6	0	4	3	3	1	3	5	6	2	5	2	0	0	3	2	1	1	2	1	2	10	1	0	8	13	2	5	1	1	1	1	2	0
LOC100577840	5	29	10	15	20	19	43	28	4	19	21	27	34	50	33	44	25	12	13	21	19	33	29	28	36	17	6	10	16	3	63	24	54	21	25	61	35	22	16	9	8	4	11	5	4
LOC100577841	23	24	18	23	33	33	14	18	9	31	31	24	26	36	27	27	27	35	17	26	26	27	19	25	16	12	4	8	8	5	28	32	89	47	37	36	35	16	34	10	9	4	1	7	2
LOC100577844	33	88	59	65	66	69	98	68	35	66	93	146	111	153	155	132	127	61	160	160	62	87	60	73	87	66	42	40	73	43	52	101	223	214	132	195	131	158	129	59	109	98	127	77	52
LOC100577845	96	235	240	238	262	326	318	181	152	210	249	367	370	404	376	352	511	430	402	391	386	382	404	220	302	151	101	103	161	146	484	546	1080	576	623	757	570	565	503	60	209	80	132	172	99
LOC100577846	101	374	270	219	376	270	399	221	159	252	301	477	440	522	589	597	508	485	481	443	359	408	385	155	466	234	172	184	259	212	466	710	1123	841	629	1036	665	483	532	155	283	220	243	243	155
LOC100577847	2	11	8	9	9	2	3	1	3	9	12	6	16	15	4	4	9	10	9	17	10	10	4	10	3	0	1	0	0	0	2	22	24	9	26	22	31	3	20	2	2	0	1	1	2
LOC100577849	4	6	3	2	6	2	2	6	1	5	8	5	7	5	2	1	9	3	4	5	1	5	7	1	2	1	2	1	2	0	8	5	9	1	12	8	6	5	7	2	1	2	2	0	0
LOC100577856	184	447	316	389	389	355	314	332	145	328	406	655	403	501	420	515	486	319	358	278	304	404	374	314	275	189	88	109	152	106	308	396	918	741	512	572	468	608	389	58	222	53	99	177	82
LOC100577870	26	71	66	46	77	92	45	18	19	67	65	94	71	84	81	72	102	78	81	80	67	101	93	40	108	46	29	31	37	47	37	68	208	160	133	142	94	78	87	22	58	29	41	49	37
LOC100577872	29	37	79	49	72	80	70	33	30	63	97	97	112	86	52	47	129	135	112	147	116	74	71	36	93	28	43	43	55	75	65	127	259	191	154	185	134	88	99	41	81	57	69	67	55
LOC100577875	683	1289	1338	1294	1278	1115	1149	792	1106	810	1199	1825	1298	1212	1063	1340	1840	1416	1243	1106	1044	1588	1345	1307	2086	1308	619	643	914	872	2161	1162	3988	2860	2571	2285	1727	4563	1157	427	1417	452	526	1056	666
LOC100577876	41	171	112	112	197	132	191	116	70	128	161	200	251	243	200	227	223	201	195	211	165	157	171	123	167	95	54	83	113	64	249	220	401	302	258	360	294	274	185	61	137	70	112	136	56
LOC100577877	16	22	26	22	25	33	17	11	10	24	37	37	38	34	50	30	64	52	41	63	41	32	31	18	56	30	13	13	18	12	29	52	109	78	75	99	61	42	33	11	24	13	14	25	13
LOC100577879	10	36	76	29	46	20	22	10	14	55	63	51	55	67	56	32	93	111	74	78	102	39	48	10	89	29	78	30	41	91	14	80	177	133	113	125	87	38	91	19	34	21	21	51	52
LOC100577882	1	1	1	1	0	4	0	0	4	2	2	1	3	1	1	2	0	2	8	5	5	3	1	2	2	0	3	10	4	1	2	0	5	2	3	3	3	1	6	3	6	22	32	1	4
LOC100577883	349	715	423	489	724	216	289	235	158	514	850	814	994	527	746	636	2093	790	610	346	706	666	405	381	876	584	222	339	481	320	497	597	890	1670	1116	802	1055	1394	978	163	525	127	148	788	283
LOC100577885	20	89	51	47	77	66	91	54	13	55	79	82	67	66	86	87	61	86	69	48	53	69	63	51	67	53	23	34	27	30	104	79	169	134	91	123	109	89	77	11	60	27	30	33	23
LOC100577886	33	121	99	127	189	138	153	133	66	95	126	147	312	239	195	189	267	317	303	359	229	140	141	54	270	64	66	75	84	135	258	345	605	453	462	539	321	235	255	68	131	70	87	125	65
LOC100577888	0	0	0	0	1	0	0	2	0	2	0	0	0	2	0	0	7	1	3	0	1	1	1	1	1	0	0	0	0	0	0	2	0	4	0	1	2	0	1	1	1	3	1	0	0
LOC100577889	0	1	0	0	0	4	1	3	0	0	2	0	2	2	0	1	2	2	3	1	0	3	1	0	0	1	1	0	0	2	1	0	6	2	0	1	4	2	1	0	3	0	7	0	0
LOC100577894	17	23	20	80	147	30	44	123	31	20	30	54	176	38	151	141	36	54	48	191	131	41	76	70	70	24	14	26	76	23	92	231	260	331	296	123	73	140	35	10	47	72	41	44	24
LOC100577895	0	2	2	0	0	1	0	0	0	0	0	0	0	1	0	0	0	0	0	0	3	0	0	1	0	0	0	0	3	0	0	1	0	0	0	0	0	0	0	0	0	1	0	2	0
LOC100577896	3	8	1	0	4	3	6	1	1	6	7	10	2	4	5	4	5	6	12	9	6	6	7	5	3	7	3	3	1	1	2	8	26	15	13	5	5	8	6	8	2	6	6	4	2
LOC100577899	40	78	52	44	94	73	64	41	33	74	59	108	75	77	68	80	60	55	62	60	41	124	77	52	53	29	20	28	33	31	63	68	130	104	71	77	64	58	62	20	45	14	31	41	15
LOC100577901	74	263	312	373	211	58	337	119	81	331	378	119	513	605	408	263	242	386	442	306	646	576	518	463	114	65	41	14	55	70	170	682	439	252	505	711	676	90	384	52	34	51	122	24	48
LOC100577903	39	149	221	147	213	182	251	152	54	141	235	245	345	285	260	247	381	435	419	422	322	186	285	67	370	123	125	89	178	142	386	661	1164	666	572	851	448	357	325	126	179	159	208	249	127
LOC100577905	21	9	38	32	51	49	33	28	10	48	33	38	74	37	23	25	75	103	96	96	99	59	42	21	71	18	20	19	29	27	52	79	171	98	109	127	63	33	56	23	21	30	42	33	24
LOC100577908	0	4	1	0	1	2	1	1	1	2	2	0	2	1	1	0	0	4	0	2	3	2	0	1	1	6	2	1	0	2	0	3	3	2	1	2	0	1	1	1	4	8	7	7	1
LOC100577909	35	59	65	72	83	82	112	67	8	73	78	109	152	113	71	84	100	58	100	90	70	101	93	74	88	69	22	26	43	25	75	82	203	149	87	146	136	122	72	31	58	32	38	43	13
LOC100577912	93	77	101	107	107	99	134	106	50	73	133	101	116	111	74	123	110	99	108	88	121	94	123	100	96	48	27	38	39	37	163	95	206	113	111	138	189	179	75	25	50	30	31	36	37
LOC100577913	476	843	836	601	1022	988	954	485	301	641	825	1211	1104	1031	911	1235	1797	1011	1225	906	729	936	1000	637	749	544	196	287	397	303	1914	1018	3492	2242	1237	1264	1109	2287	859	95	590	135	220	531	276
LOC100577915	409	244	2526	810	2168	721	315	1383	796	959	440	1634	2204	745	1027	1158	841	1307	2427	1112	1699	778	820	852	3478	1336	566	415	491	628	1019	703	1662	3274	7029	2351	1503	23417	500	185	1556	409	582	1178	298
LOC100577918	15	42	89	63	74	77	32	13	25	57	74	83	75	38	77	44	70	44	92	86	51	75	52	41	53	22	24	22	67	36	16	80	93	109	87	61	44	78	33	26	65	49	79	54	24
LOC100577919	73	53	87	64	64	90	82	38	48	39	46	55	98	125	107	87	132	112	93	89	158	73	77	74	92	69	62	45	55	56	91	130	259	215	148	181	218	146	123	43	63	43	67	94	81
LOC100577920	21	26	73	55	48	41	27	4	31	66	104	60	73	74	37	28	85	134	131	141	119	77	63	18	81	9	61	48	71	67	7	80	149	178	161	157	68	16	76	52	44	65	66	51	56
LOC100577923	77	278	172	213	378	239	368	250	59	296	258	354	498	392	368	473	272	236	277	241	319	493	295	208	228	106	53	75	98	86	339	279	587	364	287	474	420	325	234	37	95	47	93	94	60
LOC100577927	139	308	407	355	313	373	364	178	196	309	456	463	394	583	446	394	477	536	450	497	574	455	437	286	436	184	171	134	224	200	318	631	1169	837	734	1039	690	509	551	140	258	110	131	244	167
LOC100577931	55	156	120	116	198	157	163	137	101	150	207	202	261	220	217	237	259	222	256	277	193	168	180	115	216	107	67	71	80	108	255	282	517	462	359	346	320	383	216	50	184	69	90	124	60
LOC100577932	6	27	10	11	17	9	20	5	2	11	15	11	10	13	17	18	25	20	29	13	11	19	19	15	25	12	7	0	7	19	8	10	50	30	15	48	31	25	26	2	13	2	4	20	12
LOC100577936	5	4	15	15	9	14	25	2	6	12	9	15	9	12	6	10	21	12	15	8	29	13	9	5	7	6	2	6	3	11	20	15	37	18	17	22	16	23	10	5	4	2	6	15	15
LOC100577938	1	0	2	6	4	2	4	1	1	3	5	3	5	3	3	5	9	2	5	4	3	1	5	0	4	1	0	1	6	7	1	2	1	1	5	8	2	4	1	3	1	4	3	3	1
LOC100577939	0	1	3	2	4	2	9	2	6	1	2	2	8	12	8	6	3	6	2	1	7	7	3	0	4	2	1	1	4	1	12	10	6	5	10	12	10	8	1	5	3	5	11	5	1
LOC100577941	12	79	80	59	78	58	47	19	37	74	106	106	69	83	79	65	108	115	99	66	88	92	91	60	131	60	46	30	41	67	38	103	180	198	132	163	98	70	85	51	67	23	25	57	43
LOC100577942	11	21	44	35	31	39	19	10	12	26	33	15	25	25	36	18	51	37	28	28	26	26	19	9	25	8	20	8	22	11	8	22	108	47	40	59	24	13	29	16	13	5	21	11	8
LOC100577943	68	112	221	242	104	252	132	81	82	184	239	344	157	203	242	229	169	186	137	86	160	181	213	130	101	33	20	29	24	55	76	237	504	168	147	338	297	154	230	18	28	23	23	59	41
LOC100577949	12	31	23	18	33	23	24	12	4	36	26	25	41	32	11	14	30	20	17	41	18	24	37	7	29	19	11	7	23	11	27	37	82	35	43	46	21	34	23	5	32	6	12	13	6
LOC100577955	12	16	5	5	6	5	45	8	31	9	32	17	12	29	3	4	25	7	20	9	8	29	14	4	42	44	4	6	4	7	7	8	64	78	5	25	2	30	14	8	9	2	6	58	15
LOC100577958	29	55	48	43	68	67	68	30	44	68	67	100	150	101	74	79	192	146	145	159	150	61	105	32	140	62	74	42	80	69	90	232	388	286	232	355	209	133	194	53	107	66	86	88	53
LOC100577959	6	14	11	25	34	19	26	11	23	10	29	18	21	29	17	13	35	28	39	40	30	27	23	11	22	19	11	11	12	17	35	42	95	52	27	48	30	48	25	5	15	13	13	17	19
LOC100577963	130	279	206	214	331	414	535	404	228	324	309	516	611	652	537	747	527	349	459	415	318	562	534	309	243	128	59	103	125	109	877	476	804	625	368	559	600	657	307	49	168	70	51	112	76
LOC100577966	24	93	73	82	148	81	123	88	20	134	98	186	165	189	165	179	121	85	88	85	65	293	155	115	69	44	22	24	53	39	95	102	182	119	123	149	140	101	96	18	45	11	34	47	24
LOC100577967	48	122	83	69	122	108	130	85	88	105	112	202	167	181	129	132	158	110	118	141	85	163	124	74	116	83	67	43	109	51	127	111	246	214	112	203	191	172	122	47	95	62	71	81	49
LOC100577972	92	182	389	267	365	376	379	343	222	268	404	317	611	416	461	441	804	902	989	1085	832	323	390	123	841	243	287	251	389	424	965	1170	2536	1794	1447	1818	764	803	605	366	266	413	621	490	357
LOC100577974	0	3	0	0	0	1	1	0	0	3	0	0	1	0	0	1	1	0	0	1	0	0	0	0	0	0	0	0	0	0	0	0	0	1	0	0	5	1	0	0	0	0	0	0	0
LOC100577976	49	146	84	115	158	124	118	80	29	124	145	135	160	136	108	121	157	100	95	94	75	119	131	103	92	31	18	37	39	29	176	97	250	145	122	178	131	178	91	10	45	18	27	24	21
LOC100577977	1	3	4	1	3	1	4	0	0	1	3	1	4	3	1	0	1	0	1	11	4	0	4	0	1	2	1	2	1	0	4	1	6	5	3	6	0	7	2	0	0	1	4	3	0
LOC100577980	68	209	240	213	125	100	84	55	48	113	152	252	120	135	93	110	123	186	92	157	196	139	199	82	107	78	52	35	42	56	97	175	519	164	216	317	201	106	137	22	76	18	4	167	29
LOC100577981	821	1015	1527	1583	1397	1005	1066	322	1219	822	1209	1523	1746	1117	751	663	1306	1383	1239	1309	1151	1345	822	652	1455	682	496	620	992	631	803	926	2729	2155	2018	1890	1509	1810	1019	553	789	575	891	1057	603
LOC100577982	127	303	205	200	381	274	389	264	162	434	356	417	551	486	510	542	449	353	508	453	401	405	331	259	431	224	104	112	198	120	507	485	770	682	737	757	777	772	486	85	280	168	187	221	93
LOC100577986	23	14	49	39	34	45	19	12	18	44	67	43	82	36	22	15	79	69	56	78	78	65	27	19	51	12	24	14	26	35	26	49	112	92	72	108	70	34	45	32	34	40	39	36	20
LOC100577988	39	98	88	67	148	120	151	133	53	82	119	176	188	168	166	176	211	160	210	173	130	139	134	57	159	93	45	28	83	53	229	172	331	338	238	326	193	202	125	39	92	61	78	83	55
LOC100577992	29	86	60	84	128	98	147	108	17	113	117	147	253	240	125	166	128	63	83	80	85	243	141	127	53	30	9	25	23	13	123	108	123	104	110	104	119	121	76	14	25	11	11	21	13
LOC100577995	163	333	385	297	459	489	690	586	275	206	399	402	714	599	549	635	726	658	936	763	579	287	430	212	781	329	249	227	314	367	1435	902	1981	1237	1004	1435	1035	1416	595	237	300	329	449	433	253
LOC100577996	5	39	20	18	24	35	33	27	9	25	16	28	36	42	37	37	41	28	28	39	29	28	22	14	35	29	8	8	16	8	32	46	69	48	58	53	47	55	32	7	19	7	14	9	5
LOC100577997	3	23	11	3	12	22	17	4	4	10	22	25	4	13	6	9	16	6	15	7	10	6	9	6	5	2	2	3	4	1	16	11	29	22	13	15	12	15	4	1	4	1	5	3	1
LOC100577998	54	78	179	105	100	98	101	45	44	123	107	190	177	175	130	114	142	186	177	166	159	108	158	63	161	50	37	54	83	61	75	179	396	167	180	325	226	140	183	47	86	44	54	81	45
LOC100578002	54	94	72	51	82	93	81	66	58	49	105	152	115	95	87	115	104	77	74	74	80	114	77	54	63	40	11	20	31	21	137	81	174	158	98	138	158	228	80	20	53	14	24	27	24
LOC100578005	125	288	215	237	343	299	320	253	178	230	311	388	457	386	366	391	387	319	331	337	307	288	321	236	301	170	117	103	162	136	494	397	781	548	431	488	475	570	248	105	238	123	194	197	94
LOC100578006	199	620	372	466	572	630	453	225	251	433	708	768	667	658	375	469	804	529	509	582	519	637	515	406	503	274	187	243	373	224	364	478	1282	931	764	751	842	496	629	185	513	300	409	295	189
LOC100578011	5	21	16	9	25	30	31	30	14	19	25	39	25	47	45	47	26	25	37	33	12	47	16	18	18	17	16	16	29	18	38	29	45	65	46	82	43	41	37	8	35	9	16	21	10
LOC100578014	96	179	188	163	283	187	326	234	180	182	196	324	437	437	411	455	320	338	333	314	260	352	324	159	285	158	98	94	140	149	449	404	621	510	495	566	504	502	308	77	166	96	148	160	94
LOC100578015	14	26	35	36	85	30	34	18	20	49	57	41	65	41	25	25	63	56	52	52	56	38	42	27	56	8	13	17	19	12	15	79	138	79	57	113	60	18	36	22	23	23	34	19	19
LOC100578017	53	114	87	51	130	144	98	75	82	87	138	195	115	110	136	131	150	86	165	95	85	87	98	81	70	56	10	21	46	38	134	98	220	209	143	140	134	245	113	20	91	18	37	47	33
LOC100578020	7	7	8	12	9	6	13	2	11	18	19	12	7	9	14	17	13	11	11	8	6	14	9	5	14	6	4	6	3	5	5	14	27	15	12	41	23	12	19	3	15	5	8	7	4
LOC100578023	4	14	11	15	22	5	12	9	0	12	5	23	12	6	15	15	13	6	6	7	6	10	15	11	6	4	2	3	3	1	11	5	17	10	14	27	16	12	9	0	5	2	2	2	2
LOC100578025	0	1	0	2	2	0	0	2	0	0	1	0	3	0	1	2	1	0	0	0	0	3	2	1	1	0	3	1	0	0	1	0	0	14	0	1	2	2	1	1	0	0	0	0	0
LOC100578030	286	1910	2842	835	1410	535	2117	774	1224	1790	3177	1824	1300	1004	992	1091	2235	888	5905	5216	1312	1150	1287	1101	3086	2866	1815	1919	3916	2666	4111	1083	1946	4820	3295	1423	1281	1902	1174	1412	5108	2729	2493	3923	2384
LOC100578031	72	56	155	95	107	98	87	31	94	133	197	137	157	130	101	68	198	185	163	189	199	147	137	81	190	68	62	65	102	100	64	177	391	260	245	270	179	120	149	79	101	133	136	105	81
LOC100578035	204	615	381	355	556	344	393	196	317	377	397	821	421	426	449	442	509	303	355	333	186	613	407	363	442	209	145	181	312	171	330	363	706	629	504	581	420	715	314	126	468	232	290	190	130
LOC100578040	27	40	51	44	73	57	51	56	21	57	100	78	97	106	104	97	144	118	136	140	111	70	68	43	122	54	63	33	82	62	68	140	287	196	150	228	150	129	114	44	83	58	76	100	46
LOC100578041	495	815	915	1067	946	749	840	397	604	525	759	825	1109	825	837	748	749	818	763	757	748	1059	723	866	1168	567	398	357	584	592	655	764	1999	1430	1533	1180	846	1291	623	318	578	358	403	666	610
LOC100578042	0	3	2	3	0	1	3	1	1	2	3	0	3	0	1	0	1	4	4	3	0	3	4	1	10	1	0	1	0	1	0	0	16	5	0	7	3	1	1	1	1	2	2	1	0
LOC100578044	0	1	0	0	0	0	0	0	0	1	0	1	0	1	0	0	2	1	0	0	1	0	0	1	2	1	0	0	2	0	0	0	1	0	0	1	0	1	0	0	1	3	7	0	0
LOC100578045	79	62	51	50	76	33	21	13	6	73	90	122	119	20	21	22	123	139	125	84	62	92	34	22	41	72	18	28	65	10	29	23	102	43	89	113	181	136	80	11	37	16	16	15	9
LOC100578046	325	1251	752	747	1160	1126	927	647	704	756	1189	1410	970	1051	1395	1272	1191	985	1063	1143	662	993	1239	819	1214	655	318	366	609	442	788	1234	3430	2710	1468	1981	1614	1782	1210	209	1023	300	380	711	373
LOC100578048	0	1	0	3	1	1	3	6	1	2	1	1	1	2	2	3	2	1	2	0	3	3	6	1	2	0	0	2	1	1	7	1	4	1	6	2	4	4	2	0	1	1	2	2	0
LOC100578051	38	21	58	37	41	19	29	5	21	35	73	19	101	96	81	43	110	144	58	60	161	106	61	47	103	21	48	47	60	50	23	135	165	99	135	172	102	49	95	54	60	77	100	56	57
LOC100578055	0	1	0	0	0	1	1	0	0	0	0	1	0	0	0	1	1	0	0	1	2	2	0	0	0	1	0	1	0	0	0	0	4	0	3	1	3	1	0	0	1	1	1	1	0
LOC100578059	4	16	22	16	22	15	14	5	4	20	30	20	31	26	33	24	40	35	27	40	42	14	20	13	41	9	16	18	20	14	12	47	57	30	66	66	52	18	28	18	26	15	26	21	9
LOC100578060	8	9	9	3	12	16	10	8	2	3	6	8	7	13	6	8	14	6	10	9	8	6	4	5	10	6	3	4	2	5	13	4	32	15	16	32	11	15	7	2	12	4	2	6	4
LOC100578061	0	2	3	4	1	6	0	0	13	1	4	8	9	33	0	3	3	2	4	1	2	21	2	16	0	2	2	0	2	7	6	55	53	3	4	9	8	6	0	4	1	1	1	2	2
LOC100578066	16	9	60	30	27	44	40	8	29	29	72	33	80	96	61	44	174	302	114	333	321	71	58	17	93	24	70	45	44	61	26	176	174	223	139	180	86	26	196	48	14	36	44	48	39
LOC100578067	3	5	7	1	3	7	10	1	5	9	6	6	13	5	4	4	5	6	6	9	6	3	7	4	11	12	5	0	7	17	11	5	28	7	12	4	6	6	4	3	3	3	4	4	8
LOC100578068	13	10	50	22	17	29	21	11	23	29	35	17	53	41	30	25	78	134	66	97	95	21	42	13	58	12	18	16	12	32	33	78	140	77	100	138	71	50	79	19	13	13	15	29	25
LOC100578071	43	131	151	125	178	163	221	124	71	112	191	183	297	237	200	228	428	347	350	312	312	173	261	84	299	149	114	84	144	154	316	458	751	620	462	597	409	274	292	100	172	74	124	164	79
LOC100578072	0	0	0	0	1	1	1	0	0	1	0	1	1	1	0	0	1	0	0	7	2	2	2	1	0	1	6	0	0	2	0	0	1	2	0	0	3	2	1	4	0	1	5	0	3
LOC100578084	212	569	369	415	333	213	406	250	209	681	478	758	612	471	628	747	598	515	459	492	716	725	739	682	622	369	218	207	274	309	746	419	1031	544	736	750	807	794	683	129	334	154	181	330	244
LOC100578085	37	53	75	53	60	48	82	51	21	62	75	71	90	71	49	57	98	95	52	49	61	122	92	31	80	84	35	28	32	39	103	76	231	152	143	135	108	186	87	31	65	23	36	76	62
LOC100578089	40	138	103	95	142	139	265	212	53	141	123	238	205	284	286	365	205	147	196	158	136	181	183	105	160	88	46	69	57	54	346	241	460	295	220	393	357	321	160	47	104	58	54	87	64
LOC100578090	242	471	863	785	523	482	475	54	844	567	539	411	525	372	227	157	695	645	502	430	557	732	342	395	968	377	197	294	476	369	198	347	1224	743	934	986	499	598	339	48	279	50	179	512	504
LOC100578091	18	12	49	60	76	15	30	10	17	14	53	27	54	77	14	26	49	59	79	60	63	60	34	18	132	18	23	21	7	47	22	54	159	48	77	103	54	43	37	28	45	26	44	41	24
LOC100578093	7	12	12	4	12	6	7	4	7	4	8	9	17	8	4	8	13	6	8	10	9	7	9	4	4	0	2	2	6	3	5	6	29	10	6	25	12	15	5	1	7	0	3	2	3
LOC100578100	417	627	1091	954	603	499	804	243	445	443	658	842	1059	954	764	597	716	1167	783	760	1019	985	803	591	1548	325	451	424	609	626	522	1095	2608	1668	1827	1654	971	1004	814	414	334	557	665	611	584
LOC100578105	6	32	28	11	29	24	30	17	10	21	23	28	34	26	30	25	27	22	25	28	24	22	28	10	28	8	9	6	17	2	23	37	64	48	44	67	35	34	38	10	27	6	10	21	2
LOC100578106	77	212	155	244	169	229	199	74	47	211	230	309	236	270	269	245	299	253	225	189	283	324	296	220	199	84	75	80	110	70	107	314	555	327	280	632	373	197	236	58	149	93	95	73	64
LOC100578107	0	3	1	0	0	0	0	0	1	0	0	0	0	0	1	0	1	0	0	1	2	1	0	1	3	1	1	2	4	0	0	0	0	0	0	2	0	1	0	1	2	4	2	1	0
LOC100578109	14	46	37	33	53	44	60	33	23	46	40	71	84	68	67	56	85	67	70	64	39	55	72	39	67	33	17	12	32	21	36	66	136	131	91	118	66	70	47	13	36	18	15	22	25
LOC100578112	3	15	24	20	22	9	6	10	10	8	23	30	34	28	9	11	46	41	31	31	48	24	30	14	25	23	12	5	10	8	15	32	70	57	41	49	40	13	32	5	10	12	14	15	13
LOC100578113	92	147	128	125	239	179	250	165	28	165	177	307	293	246	229	315	197	125	156	143	109	335	186	196	105	59	33	31	65	50	239	170	297	261	198	215	252	251	99	12	54	22	44	45	32
LOC100578119	143	416	230	196	276	243	364	261	64	282	311	451	278	352	371	484	220	178	173	161	180	409	340	301	156	81	45	58	69	82	286	189	492	295	235	297	286	244	188	37	115	41	53	84	64
LOC100578121	58	113	105	261	161	150	138	66	44	150	193	230	215	138	139	127	282	292	175	226	270	176	151	135	233	128	94	80	138	161	137	190	489	370	386	315	306	201	215	90	176	89	109	151	134
LOC100578123	3	9	8	6	7	4	2	2	1	6	9	12	5	8	3	2	12	5	8	11	7	10	7	6	15	0	2	3	2	1	5	11	26	16	14	19	6	2	2	1	9	6	8	7	8
LOC100578126	1	1	11	11	14	7	4	6	1	14	9	16	15	7	3	2	9	10	10	10	7	12	3	6	10	1	2	3	3	3	3	11	22	17	8	28	5	8	7	1	4	11	8	5	5
LOC100578129	28	57	41	39	77	41	81	80	33	28	42	76	85	91	93	122	59	59	84	73	42	49	49	7	84	30	18	26	47	41	143	73	182	144	117	157	131	194	85	31	45	36	63	38	34
LOC100578130	10	3	4	10	8	2	7	5	4	2	7	8	3	6	3	5	2	3	4	1	5	11	9	2	15	0	1	2	1	9	13	9	19	2	3	5	5	12	1	0	7	1	1	3	2
LOC100578132	124	402	346	328	340	367	323	153	201	276	420	532	423	462	337	327	548	383	551	509	361	577	393	325	658	244	191	250	450	270	163	444	1052	1033	852	825	577	490	614	208	528	484	576	356	260
LOC100578133	0	0	2	0	0	0	1	0	0	0	1	1	0	0	0	1	0	6	1	0	0	2	0	0	0	2	0	0	1	0	1	0	1	0	0	1	0	0	1	0	1	0	0	0	0
LOC100578137	1	0	1	1	0	1	0	1	1	0	1	0	0	3	2	2	1	3	1	3	2	0	2	0	0	0	0	0	0	1	1	0	3	0	0	5	1	2	2	1	0	1	2	2	0
LOC100578144	9	2	17	15	10	11	4	10	9	9	15	5	11	10	8	7	17	11	18	15	22	4	11	11	12	6	8	2	4	3	11	15	48	9	37	19	9	8	8	6	15	10	14	13	8
LOC100578146	3	5	12	12	10	8	7	2	1	7	16	11	20	10	11	7	22	31	16	20	21	6	10	3	27	7	10	8	9	11	12	24	45	35	32	30	16	13	24	14	3	18	30	11	16
LOC100578151	2	2	0	2	4	0	2	1	0	0	2	2	1	4	1	1	2	1	0	1	0	1	2	3	2	2	2	1	1	3	2	5	4	0	1	1	0	3	4	1	0	0	2	0	0
LOC100578156	26	38	43	50	70	74	111	38	95	49	46	14	103	84	59	69	83	68	174	139	83	107	139	77	795	360	530	167	211	412	930	55	276	214	765	94	100	1141	41	177	391	119	140	652	501
LOC100578157	15	16	43	33	25	52	39	19	17	20	59	26	50	37	28	13	69	71	72	61	94	32	41	18	59	31	18	9	31	28	63	77	151	90	81	80	58	60	48	13	13	31	28	38	20
LOC100578159	101	248	403	323	305	350	400	191	111	290	515	414	559	607	364	303	627	849	650	701	692	431	368	205	673	246	285	198	290	374	365	885	1547	1104	1077	1392	814	439	675	236	218	214	337	430	290
LOC100578161	39	78	92	94	113	117	92	34	35	117	141	137	165	143	118	89	169	182	179	183	150	126	136	65	143	42	50	48	75	82	69	188	344	234	216	267	165	92	152	72	61	67	72	72	56
LOC100578162	14	48	31	31	41	35	38	37	14	21	31	52	29	46	38	40	38	31	33	33	31	37	24	22	27	28	8	12	24	18	47	22	84	46	30	53	50	58	37	12	19	6	17	15	10
LOC100578165	9	17	7	15	10	19	12	2	11	4	24	10	16	12	8	4	23	12	6	19	14	10	8	6	12	5	6	5	9	10	7	11	39	29	16	30	29	18	10	0	3	2	4	4	2
LOC100578168	6	14	42	29	25	21	14	0	19	29	35	37	29	31	23	15	35	72	63	76	83	49	28	7	91	11	21	21	24	48	5	64	153	163	99	96	29	8	83	12	12	7	24	69	41
LOC100578170	4	24	23	21	26	28	17	31	14	15	23	43	47	38	33	42	49	34	34	42	37	24	30	16	37	16	10	16	13	16	44	45	104	52	38	63	50	49	26	14	27	19	18	22	14
LOC100578177	68	96	176	209	169	147	229	110	95	79	204	158	252	221	160	171	141	149	168	206	243	199	131	152	89	75	63	44	75	113	450	208	625	174	203	233	242	216	106	41	65	83	67	83	74
LOC100578184	11	22	30	10	7	19	7	10	7	17	12	49	21	12	28	25	2	24	17	14	6	9	38	9	16	6	3	11	7	13	20	23	55	37	39	42	42	22	12	1	16	4	5	9	2
LOC100578188	26	69	57	38	102	69	69	60	37	47	76	81	90	86	78	79	53	43	66	46	41	78	75	51	46	33	30	22	31	22	61	81	153	98	65	108	81	80	57	13	51	7	19	42	20
LOC100578191	43	127	74	66	147	82	140	127	39	106	119	166	106	131	141	152	66	68	94	47	53	128	112	140	50	42	21	23	47	23	123	70	118	75	99	141	114	92	72	19	62	24	28	53	22
LOC100578193	1	7	12	11	7	4	5	2	1	4	9	8	6	5	7	5	11	2	3	4	20	10	3	2	4	0	2	2	2	4	4	6	12	5	6	12	9	5	8	2	2	2	1	2	0
LOC100578200	41	51	53	24	70	35	47	37	17	51	74	82	61	81	40	36	48	55	41	33	29	42	37	26	44	32	12	12	23	15	44	39	68	57	86	101	95	87	27	7	33	21	12	18	9
LOC100578201	52	156	160	118	179	181	175	133	80	135	206	187	286	281	212	182	357	321	360	372	266	151	194	97	298	115	82	100	163	131	256	324	637	582	421	509	438	380	317	92	127	130	150	161	118
LOC100578205	37	133	67	89	117	62	107	79	29	87	111	126	134	116	113	127	100	79	97	108	64	92	92	62	105	50	28	46	50	39	120	88	214	197	151	186	114	151	88	27	96	55	48	54	35
LOC100578207	4	20	34	14	35	21	25	13	7	21	27	34	24	22	15	17	27	16	27	11	28	39	15	18	20	18	11	9	10	17	24	19	43	20	22	33	31	22	20	3	22	10	19	16	12
LOC100578209	85	255	208	200	252	232	192	92	110	326	354	381	297	330	254	210	371	400	275	301	274	342	311	167	308	152	100	89	132	136	166	325	613	586	375	586	414	305	296	105	164	73	103	145	105
LOC100578212	75	197	183	153	227	218	254	200	87	152	262	286	249	281	220	274	289	231	213	249	213	257	228	161	201	106	75	85	118	100	374	296	592	356	329	409	408	468	228	52	133	59	94	112	77
LOC100578213	39	127	121	132	97	89	124	86	29	91	112	122	136	124	155	127	109	136	117	133	152	103	118	87	105	39	37	26	28	45	121	170	244	211	170	207	139	134	116	18	43	20	33	65	31
LOC100578215	35	76	66	91	75	62	63	17	47	56	78	120	70	68	61	47	103	116	86	120	80	102	86	47	112	58	24	27	52	42	40	96	249	185	194	195	136	106	119	14	84	26	23	39	31
LOC100578218	151	589	369	508	796	631	753	511	92	580	541	996	1355	854	818	889	598	401	662	491	319	1210	693	620	376	268	115	134	214	153	625	624	989	663	601	804	674	589	449	75	254	116	144	152	97
LOC100578220	3	2	11	3	17	3	6	2	1	7	17	11	21	15	9	8	25	25	16	34	54	14	11	5	18	4	5	7	11	13	14	18	19	21	31	41	19	10	17	13	8	8	17	13	5
LOC100578223	3	6	6	14	13	18	5	7	2	18	15	26	14	17	8	8	10	8	7	15	8	18	12	4	13	6	4	2	8	7	15	15	18	9	11	30	14	20	7	3	16	5	10	9	8
LOC100578226	724	786	883	894	801	763	417	356	481	736	1110	1422	885	947	647	790	1260	1201	1024	1004	1221	1198	945	650	1220	585	340	360	681	431	966	978	3668	1872	1617	1660	1268	1598	900	229	780	257	437	626	464
LOC100578227	1	1	3	11	0	6	1	1	0	4	6	17	3	4	1	2	3	12	6	1	0	5	1	3	4	2	3	2	4	1	4	13	23	4	4	5	4	11	7	0	3	8	3	0	0
LOC100578232	107	363	224	169	147	142	225	192	79	211	204	352	204	209	229	286	134	188	184	146	126	200	209	210	164	84	67	44	78	79	248	213	413	267	196	290	209	423	125	46	110	32	54	68	63
LOC100578233	18	28	29	24	17	23	22	18	18	15	50	32	22	27	39	31	30	28	36	16	28	27	33	25	36	16	10	12	13	15	34	33	92	46	52	87	34	55	23	11	20	8	11	10	8
LOC100578235	33	94	64	64	87	50	75	56	38	74	95	132	78	88	70	105	70	71	71	63	55	111	79	65	52	34	24	21	47	29	82	69	128	99	73	114	128	108	69	15	53	24	23	42	22
LOC100578236	8	13	14	13	21	13	14	9	6	20	11	12	18	18	7	12	28	22	15	13	18	17	10	9	10	8	2	0	8	6	30	9	52	32	13	32	29	30	19	2	5	2	9	12	5
LOC100578237	12	31	33	28	27	39	66	56	16	32	44	52	77	80	61	63	76	60	91	75	44	47	40	26	55	51	23	29	29	24	80	85	171	125	108	143	93	92	69	23	44	28	63	24	21
LOC100578238	22	30	54	49	86	46	57	9	37	44	51	49	70	34	32	26	84	79	45	59	51	54	54	16	60	34	38	26	43	58	26	53	139	60	69	88	53	54	47	45	54	102	95	50	39
LOC100578239	16	41	29	32	56	45	37	41	23	41	37	92	41	70	53	70	50	27	29	27	23	46	44	45	48	16	9	8	16	17	90	52	106	54	65	62	57	78	44	8	18	13	22	13	11
LOC100578243	329	762	498	596	692	830	641	492	212	463	834	911	714	780	633	838	773	538	683	583	516	791	639	596	487	308	177	210	288	192	726	576	1382	975	800	765	830	884	594	136	491	196	272	274	192
LOC100578245	13	59	54	37	60	39	55	28	10	45	62	56	86	64	38	37	60	30	55	74	37	78	64	44	44	36	20	16	24	21	53	48	115	103	80	78	73	62	50	26	37	45	41	35	21
LOC100578246	102	124	223	189	202	160	154	60	137	199	259	261	267	205	186	142	339	298	263	276	269	308	182	205	448	142	145	109	151	163	113	259	850	473	479	436	292	325	250	121	159	105	156	179	147
LOC100578247	20	15	24	14	27	34	44	14	44	23	33	56	27	35	20	52	54	20	140	117	33	33	34	16	88	42	4	8	31	23	125	27	174	137	68	40	49	84	26	3	37	8	4	38	29
LOC100578248	5	14	15	25	17	6	19	9	6	10	27	8	39	21	10	6	35	26	26	29	48	16	23	8	23	8	9	13	18	8	25	31	59	26	35	30	29	22	54	20	11	34	32	13	16
LOC100578249	0	3	1	5	3	2	5	5	0	3	1	5	2	5	3	4	7	7	2	4	6	7	3	3	9	2	0	1	5	7	5	13	17	10	6	13	5	7	4	0	4	7	1	2	3
LOC100578253	156	139	241	220	287	334	199	100	193	237	423	276	335	281	259	226	562	394	627	631	530	306	325	171	398	159	183	196	252	253	273	451	1066	1019	757	548	439	490	479	114	306	115	191	342	271
LOC100578255	0	5	5	6	3	2	7	8	4	8	10	10	13	10	11	7	18	21	21	10	11	6	4	8	17	8	3	4	8	6	15	17	35	36	37	33	22	12	14	7	5	12	10	9	2
LOC100578257	22	40	46	44	61	77	59	30	22	40	57	56	78	91	73	69	105	95	88	144	106	55	63	38	96	41	27	29	29	31	76	117	197	165	128	169	142	103	64	16	82	24	39	37	24
LOC100578259	54	205	163	161	270	170	194	113	63	164	171	337	311	249	268	283	150	163	235	183	164	243	207	175	130	105	30	46	97	61	189	283	310	208	256	287	222	266	175	33	122	31	59	70	34
LOC100578260	31	87	95	95	143	137	149	66	45	101	153	162	231	152	170	168	248	228	222	223	199	145	139	72	224	127	81	103	157	100	138	218	433	405	377	381	254	249	213	81	165	103	129	140	90
LOC100578262	51	132	178	164	163	209	168	121	97	179	249	220	357	260	200	179	364	424	370	460	375	168	202	100	445	172	162	102	163	202	286	431	750	673	643	790	478	383	353	168	166	214	282	194	163
LOC100578263	2	2	0	2	0	2	2	0	2	1	2	0	3	4	2	1	1	1	5	4	1	1	1	1	1	0	0	1	1	0	3	2	2	2	0	2	3	2	0	0	1	1	2	0	0
LOC100578265	0	0	0	0	0	0	0	0	0	0	0	0	0	0	0	0	0	0	0	0	0	0	0	0	0	0	0	0	0	0	0	0	0	0	0	0	0	1	0	0	0	1	0	2	0
LOC100578266	58	198	131	119	239	170	174	142	93	110	142	225	170	185	166	198	148	147	131	110	91	203	144	120	113	63	30	42	60	56	193	129	343	170	181	214	172	239	114	24	98	29	39	66	21
LOC100578269	716	1259	1179	1590	1308	1355	1213	636	345	1064	989	1360	1259	1107	653	1382	1112	901	1365	703	934	1140	1412	913	717	732	397	459	402	332	958	1013	3301	1213	1808	2182	1692	1764	926	328	737	332	288	502	203
LOC100578271	133	403	230	314	608	387	563	488	142	346	346	666	799	669	787	918	667	464	649	419	370	579	455	215	481	264	155	176	240	200	953	811	1284	838	768	1071	800	963	515	99	319	104	182	213	132
LOC100578276	0	0	0	0	0	0	0	1	2	1	0	0	0	0	0	0	0	1	0	0	2	0	0	0	0	0	0	0	0	0	0	0	0	2	1	0	1	0	1	0	0	0	0	1	1
LOC100578277	19	73	47	39	85	64	79	59	8	64	78	106	77	110	56	94	43	33	48	40	32	96	73	40	26	26	6	10	17	18	68	52	86	79	43	85	58	60	35	6	30	11	17	22	16
LOC100578281	72	141	143	135	225	178	163	124	127	152	244	277	321	250	187	211	379	404	352	352	276	227	263	96	381	204	130	140	180	188	316	381	689	657	625	568	374	450	327	135	232	122	163	224	116
LOC100578286	158	214	270	224	270	169	177	121	109	189	217	387	276	221	189	222	238	317	197	250	210	265	221	191	240	160	46	66	90	109	323	198	668	578	359	421	351	546	287	49	146	37	41	121	73
LOC100578289	0	0	0	0	0	0	0	0	0	0	0	0	0	0	0	0	0	0	0	1	0	0	0	0	0	0	0	0	0	0	1	0	0	1	0	0	0	1	1	0	0	1	0	0	0
LOC100578296	9	26	33	22	57	37	23	30	18	16	42	48	48	36	27	31	38	22	39	35	21	42	20	18	23	16	9	4	23	7	37	35	60	39	28	33	27	41	13	10	25	2	4	12	6
LOC100578298	28	113	122	116	157	115	182	142	29	117	135	212	256	264	263	264	219	192	176	242	204	157	187	126	169	59	53	39	76	80	216	317	467	285	281	459	301	260	235	37	94	47	51	85	36
LOC100578300	33	57	107	79	86	66	69	16	31	91	134	120	133	142	119	89	132	194	142	145	165	97	102	63	137	75	43	46	81	93	23	127	253	188	213	241	222	98	195	62	98	69	71	95	76
LOC100578307	0	0	2	0	2	2	2	1	1	0	0	3	0	0	1	1	0	3	0	3	0	0	2	0	1	3	0	0	1	2	4	1	0	5	2	3	2	2	1	1	0	1	1	1	1
LOC100578309	28	81	55	71	70	53	63	56	24	54	72	85	84	80	84	92	52	66	49	61	60	64	63	55	48	33	16	20	20	24	72	74	144	91	56	100	80	92	67	16	45	30	44	35	26
LOC100578311	238	461	329	301	483	305	425	338	341	322	378	632	461	462	530	581	638	441	535	401	414	518	453	348	486	303	191	152	267	213	651	488	1300	946	724	837	675	1250	486	132	392	158	194	309	167
LOC100578314	10	5	26	16	25	23	15	1	10	24	38	11	44	24	8	11	36	59	39	35	52	25	20	12	38	7	8	8	14	15	6	41	146	60	47	78	39	32	33	4	18	16	19	15	18
LOC100578316	0	1	2	7	4	2	9	1	10	2	2	1	13	5	3	4	5	1	10	10	13	5	1	1	2	0	2	1	0	2	5	4	13	6	3	7	7	10	4	0	3	0	1	2	4
LOC100578321	14	20	59	33	68	26	25	5	29	51	78	29	94	47	39	20	78	123	101	106	93	73	50	25	62	18	24	15	28	56	14	118	258	141	134	147	81	18	80	39	32	23	39	42	45
LOC100578323	23	30	51	53	37	21	33	8	38	35	55	72	54	64	26	28	51	78	38	63	44	61	48	40	85	28	33	17	45	45	23	95	187	141	140	129	46	65	57	19	44	18	13	66	31
LOC100578329	224	47	55	102	412	1210	51	28	91	81	367	224	263	82	51	77	987	288	941	1005	166	198	73	52	1076	223	177	252	407	382	486	54	1775	711	794	94	101	579	67	104	835	121	109	181	161
LOC100578330	44	149	84	83	218	77	189	161	53	125	106	235	195	243	251	283	122	104	155	125	85	228	117	83	107	51	33	33	60	41	179	190	303	204	146	300	229	160	135	32	97	28	40	49	32
LOC100578332	19	40	35	26	42	32	42	30	17	28	36	47	33	32	37	33	49	54	51	39	56	42	30	21	35	31	17	12	16	16	58	44	115	86	59	102	53	60	41	18	17	20	13	17	28
LOC100578334	7	14	20	33	38	34	57	25	19	20	18	22	16	31	29	25	26	20	20	21	29	17	27	27	21	8	10	13	10	14	22	31	109	45	31	60	38	51	28	11	15	10	9	20	14
LOC100578337	15	27	86	62	34	65	34	29	17	69	103	50	36	57	54	33	112	134	155	102	76	24	24	45	65	38	20	17	14	20	15	131	115	59	56	152	107	45	95	23	22	28	21	19	23
LOC100578339	36	72	89	54	82	42	65	46	33	56	91	103	129	112	106	91	112	116	117	132	100	110	117	22	135	62	49	40	61	53	71	187	318	212	188	297	119	85	116	50	85	53	76	94	54
LOC100578341	468	1856	767	875	910	465	938	500	284	813	1017	1728	985	1410	1314	1188	790	1032	562	568	688	1533	1028	888	1061	308	227	123	219	262	996	1023	2024	2068	1180	2089	1385	1409	1023	109	275	46	49	266	162
LOC100578345	5	2	7	6	7	6	5	7	1	6	4	8	11	4	8	7	7	11	2	2	12	4	4	9	9	8	4	1	4	0	22	10	27	20	7	20	14	15	3	5	0	3	4	1	9
LOC100578346	36	179	116	100	161	115	157	100	40	156	179	259	163	228	237	218	122	144	112	112	91	162	151	118	71	67	33	36	52	26	170	153	301	165	127	238	167	199	131	27	109	50	47	53	45
LOC100578347	215	347	205	172	198	290	248	392	123	47	286	174	479	692	632	519	293	168	715	299	278	341	285	255	401	521	172	126	154	126	296	214	1287	2085	259	379	216	1015	272	78	302	68	101	247	270
LOC100578349	6	17	26	19	23	23	30	11	10	5	11	4	20	24	21	17	19	21	25	35	38	16	12	9	16	12	8	12	16	19	57	25	82	40	29	43	32	32	20	15	10	19	30	12	4
LOC100578352	0	1	0	1	3	5	0	1	3	4	6	4	1	1	2	3	1	3	3	4	0	5	0	0	14	14	9	7	13	10	3	1	3	11	2	1	4	16	2	2	20	2	18	11	19
LOC100578355	24	95	92	97	183	147	215	111	39	105	126	145	335	283	177	204	253	244	228	211	232	208	230	91	233	74	39	55	97	82	233	272	463	303	338	404	296	196	203	50	100	56	68	56	45
LOC100578356	47	71	160	44	68	79	74	18	153	118	171	127	131	117	120	85	241	251	169	240	203	208	233	87	426	148	111	69	225	242	56	321	764	931	664	379	228	198	321	115	180	49	89	399	160
LOC100578360	98	172	105	145	274	267	296	244	96	178	211	317	429	325	341	419	398	275	346	380	194	256	262	129	261	117	73	76	141	94	557	325	615	457	346	463	444	574	280	89	204	130	173	116	94
LOC100578363	19	84	73	67	88	68	68	50	23	82	84	122	122	87	138	114	76	80	89	95	60	96	61	66	70	43	20	29	47	21	34	118	108	114	126	218	133	113	84	39	69	42	41	37	20
LOC100578368	23	25	40	40	63	45	33	6	14	36	60	35	68	49	21	16	61	57	54	61	65	45	38	14	35	11	10	14	11	24	14	48	121	70	44	75	25	17	38	16	17	18	16	30	13
LOC100578370	31	100	106	91	143	111	134	98	59	115	137	177	159	182	148	141	186	163	141	205	157	122	135	82	156	97	67	59	83	95	179	208	441	375	270	385	204	267	179	36	104	41	60	75	63
LOC100578380	18	61	56	41	72	52	37	60	26	34	63	56	55	59	37	56	51	43	59	45	39	71	47	23	42	42	9	29	32	18	73	56	121	105	90	71	63	106	55	25	51	21	30	26	25
LOC100578382	8	11	8	16	28	18	24	19	6	10	13	19	45	27	18	26	32	31	37	28	40	19	19	8	30	17	5	11	18	18	37	38	63	54	32	58	46	30	32	11	16	30	23	14	7
LOC100578386	39	88	80	78	123	86	139	135	47	66	66	103	151	206	143	136	122	195	170	157	109	97	133	68	236	93	48	49	91	58	216	209	334	222	194	416	320	368	124	49	123	43	63	75	65
LOC100578388	39	83	116	90	102	99	89	43	56	113	126	142	153	149	109	87	154	171	140	152	197	124	133	101	163	53	60	43	74	105	105	193	361	217	210	323	193	109	208	50	101	49	74	93	65
LOC100578389	45	87	89	90	106	40	60	45	23	67	117	135	119	144	148	89	106	103	94	117	115	93	71	91	80	32	24	23	31	43	51	120	235	245	166	221	128	90	140	32	37	3	14	45	40
LOC100578397	4	16	17	9	11	11	17	10	5	6	9	41	29	22	32	19	34	24	19	15	22	14	25	11	24	4	7	5	5	9	40	40	30	64	20	26	40	53	17	4	7	4	2	14	8
LOC100578399	9	15	13	14	15	20	31	19	2	12	21	23	16	16	31	25	22	17	20	14	16	10	22	9	16	14	7	2	9	6	38	29	38	33	20	31	21	38	13	2	11	3	3	8	3
LOC100578400	0	0	0	1	0	1	0	0	0	0	0	0	0	0	0	0	0	0	0	0	1	0	0	0	2	0	1	1	0	0	0	0	1	0	0	0	0	0	0	0	0	0	0	1	0
LOC100578404	68	170	182	161	216	253	248	167	89	155	245	282	344	271	246	255	521	467	364	392	413	201	272	130	461	196	145	145	212	218	385	533	927	784	591	759	555	555	409	205	182	189	270	183	159
LOC100578406	9	38	28	32	44	34	30	15	7	29	38	58	47	38	42	33	52	63	45	49	37	67	54	20	28	13	13	16	31	26	15	59	111	78	63	92	67	32	44	17	28	15	29	24	12
LOC100578412	398	572	1043	761	901	609	483	291	537	579	667	1207	933	885	699	555	852	951	832	729	674	770	648	440	1418	534	447	224	505	656	424	721	2505	2036	2428	1326	870	1324	603	266	479	97	183	959	493
LOC100578413	5	8	7	10	6	2	7	5	0	5	4	12	1	3	5	8	6	12	8	3	10	4	4	4	9	3	6	0	3	3	13	10	5	10	8	7	15	10	5	3	4	3	15	5	3
LOC100578417	3	9	5	2	10	4	9	6	4	4	7	12	5	6	9	4	11	3	3	2	8	7	7	2	2	3	1	0	3	2	7	10	14	7	9	10	13	14	6	6	4	2	6	4	1
LOC100578418	43	44	43	67	96	83	81	45	52	48	69	68	108	65	70	89	53	46	76	60	67	55	40	36	72	38	14	28	34	28	155	39	115	91	66	79	95	125	39	15	44	22	32	27	19
LOC100578420	219	400	564	603	369	276	531	269	289	420	518	343	632	850	510	455	485	447	554	539	922	565	480	523	433	236	282	194	300	242	458	671	1146	483	765	1120	894	440	458	292	378	350	395	279	236
LOC100578421	13	47	35	46	67	54	35	35	8	45	42	36	89	63	37	61	71	60	54	74	64	45	45	38	43	30	22	17	34	9	69	62	143	59	73	99	69	98	40	20	29	20	39	30	16
LOC100578423	31	29	53	61	44	33	23	8	31	38	78	46	65	52	27	16	90	134	64	107	139	58	49	16	85	21	51	21	59	46	26	72	242	172	118	120	63	31	84	36	43	49	52	80	62
LOC100578424	22	57	44	37	61	33	57	47	25	44	40	84	84	96	66	64	58	47	56	52	49	58	72	40	55	36	16	17	23	29	64	81	122	104	95	132	97	72	78	9	37	9	11	25	14
LOC100578428	52	267	86	108	169	157	166	173	65	143	126	289	172	229	143	194	108	73	141	111	88	223	171	129	66	56	23	49	42	34	184	99	226	180	128	183	152	119	85	12	82	37	34	52	19
LOC100578429	4	12	21	14	31	42	34	36	16	8	17	20	36	41	33	34	40	45	64	34	32	27	38	5	46	24	14	11	17	35	123	68	105	100	58	111	77	133	37	15	27	21	33	35	11
LOC100578433	42	104	120	114	157	179	131	96	50	148	186	176	252	246	169	172	308	334	327	300	301	198	199	104	269	107	102	107	121	133	182	327	641	634	440	503	365	238	299	83	131	119	155	163	109
LOC100578434	105	280	193	71	108	117	282	100	306	261	290	226	112	189	154	161	136	176	246	294	101	108	311	45	483	208	81	112	94	94	113	268	646	465	324	1068	256	440	601	161	242	80	167	314	105
LOC100578437	208	149	178	41	323	46	91	29	131	56	315	158	135	35	42	29	232	54	367	202	159	51	39	53	214	61	35	86	107	96	241	37	136	398	120	101	57	252	63	40	57	39	80	65	79
LOC100578439	135	250	463	425	344	327	323	134	174	366	428	213	582	462	285	264	683	871	535	618	1027	396	425	195	523	171	174	187	292	211	322	658	1451	878	774	864	700	369	684	261	215	306	480	291	221
LOC100578442	0	0	0	0	0	0	0	0	0	0	0	0	0	0	0	0	0	0	0	0	0	0	0	0	0	0	0	0	0	0	0	0	0	0	0	0	0	0	0	0	0	0	2	0	0
LOC100578443	4	12	12	12	20	20	25	9	12	13	21	18	29	13	26	27	22	19	35	27	30	33	24	11	36	8	15	9	23	12	12	23	73	51	51	31	48	35	12	11	24	9	15	17	7
LOC100578445	18	22	33	23	41	25	16	10	22	27	27	19	26	28	25	21	43	39	25	33	24	21	23	13	31	19	6	7	15	19	32	38	86	37	32	44	25	40	34	17	31	10	12	20	12
LOC100578446	40	78	94	93	24	27	40	6	33	68	107	38	75	172	78	66	44	207	53	82	184	138	142	45	128	28	24	14	40	46	19	144	364	180	134	265	135	44	111	30	27	16	18	70	34
LOC100578448	7	18	11	16	20	29	13	18	13	11	13	12	17	15	19	21	19	15	22	16	12	16	18	6	24	6	7	2	12	11	12	14	37	18	14	27	24	25	17	0	18	9	8	9	8
LOC100578450	71	157	184	160	201	169	223	174	104	125	177	211	263	244	249	234	392	442	316	377	304	191	232	93	391	131	122	91	175	158	495	433	937	643	521	732	467	586	310	124	130	118	127	187	124
LOC100578464	10	26	31	15	23	25	34	20	10	25	15	32	14	38	31	23	20	17	32	28	24	24	19	12	34	10	7	8	8	8	33	35	102	32	42	39	35	39	37	6	15	7	8	11	7
LOC100578466	19	25	20	16	36	20	15	9	4	23	31	14	19	23	8	7	19	15	30	36	12	12	15	15	16	5	7	10	7	12	10	26	59	30	25	35	21	17	15	6	17	10	24	12	5
LOC100578467	4	10	27	13	7	6	10	5	3	16	25	9	25	29	10	8	26	22	18	17	44	21	18	20	10	1	5	0	9	4	7	36	26	20	19	53	23	13	22	7	7	6	14	8	9
LOC100578468	1	7	3	4	2	2	2	0	4	6	6	4	7	2	2	4	0	1	0	3	1	3	1	1	5	3	0	5	1	1	3	2	9	15	3	4	4	4	5	3	5	0	0	1	1
LOC100578472	100	344	173	220	272	231	218	170	33	222	219	352	334	274	265	295	232	162	114	168	139	384	220	224	141	91	57	77	100	71	207	201	435	295	280	275	237	257	155	50	134	49	66	92	53
LOC100578473	60	215	160	127	183	147	222	165	90	155	206	251	257	213	197	299	204	171	157	152	143	247	203	157	143	85	48	55	60	74	288	195	372	219	219	309	256	246	164	39	109	32	48	73	30
LOC100578476	0	0	0	0	0	0	0	0	0	0	1	0	0	0	0	0	1	0	0	0	1	0	0	0	0	0	0	0	2	0	0	0	1	2	0	1	0	0	0	0	0	0	0	0	0
LOC100578478	8	12	6	9	16	14	14	9	5	8	18	19	31	22	12	17	19	27	26	20	22	25	24	16	16	20	5	4	7	11	23	18	37	25	36	29	41	25	20	1	10	6	4	5	6
LOC100578479	29	98	69	60	90	73	136	125	42	78	86	138	169	163	163	194	166	124	161	120	123	124	139	62	112	56	52	38	73	57	273	167	283	240	203	264	217	251	141	42	86	44	51	64	34
LOC100578482	38	88	77	101	87	64	81	57	33	98	111	147	133	144	97	111	111	89	82	107	91	120	108	66	80	35	39	33	58	40	72	126	221	171	178	230	152	122	110	19	71	30	34	40	44
LOC100578483	48	157	85	85	133	75	117	74	58	105	141	205	165	221	165	170	133	72	127	71	96	171	160	109	85	41	19	29	43	36	116	112	220	183	116	138	155	112	126	16	60	19	23	29	11
LOC100578484	7	6	19	29	28	23	16	2	7	13	33	7	26	18	11	16	26	18	12	15	33	21	19	13	13	11	2	11	5	6	5	17	25	15	24	23	18	9	19	5	17	14	17	7	7
LOC100578498	15	45	48	41	51	30	47	25	16	43	65	66	83	92	71	49	103	118	83	68	101	80	56	31	64	28	12	12	31	53	47	78	165	99	128	125	115	51	100	17	22	32	24	44	54
LOC100578502	2	9	15	7	13	6	7	5	2	18	13	15	8	8	6	2	11	9	7	8	7	14	13	10	5	6	3	4	1	7	8	15	19	12	19	19	7	10	4	1	6	1	2	5	6
LOC100578503	57	179	126	117	147	145	150	106	75	146	197	199	184	218	160	161	227	173	180	198	213	171	173	116	167	96	53	46	80	66	142	203	375	347	241	300	253	208	192	55	156	69	82	103	60
LOC100578507	32	106	68	66	105	89	95	74	42	65	64	114	87	114	115	135	87	81	86	101	68	135	97	62	88	53	27	28	52	26	134	85	232	114	130	170	104	132	75	21	55	24	50	46	24
LOC100578512	3	10	19	9	33	15	18	3	6	14	27	7	13	14	2	4	19	18	14	16	11	26	16	3	19	3	13	10	8	28	17	14	43	17	44	24	11	5	14	2	8	6	8	7	13
LOC100578513	56	158	115	136	269	203	220	129	77	210	194	257	356	242	274	263	341	311	310	377	260	305	241	148	258	170	72	112	150	107	220	321	469	398	457	405	334	267	260	68	184	69	120	115	103
LOC100578514	0	1	5	0	0	1	0	0	2	3	2	1	0	0	0	0	1	1	0	0	2	0	0	0	1	0	1	2	0	0	0	0	1	1	1	0	1	0	3	0	0	0	2	2	0
LOC100578515	41	76	138	138	91	86	75	15	32	117	183	72	244	191	197	113	313	426	218	293	582	240	166	75	209	71	133	97	209	127	18	341	412	322	430	529	362	51	384	184	180	270	336	125	145
LOC100578519	50	243	202	202	207	320	295	283	72	138	241	209	300	363	295	312	303	328	300	339	306	276	272	181	247	147	115	86	180	151	432	375	714	548	482	626	411	422	343	123	177	168	248	168	134
LOC100578522	186	578	350	387	557	496	474	324	192	427	573	656	705	578	559	672	588	479	474	533	494	740	536	383	468	243	120	129	200	218	464	557	1058	733	679	798	756	644	482	120	424	148	185	274	176
LOC100578523	24	34	45	47	64	45	51	19	30	26	54	59	98	64	26	46	78	65	71	60	84	65	38	40	56	22	10	11	26	24	58	92	162	77	65	136	103	75	51	21	37	21	34	21	17
LOC100578524	33	19	18	26	32	44	26	16	16	42	94	11	41	37	42	46	50	63	49	37	41	18	23	47	36	18	11	10	28	14	39	49	75	80	39	70	24	58	18	13	31	20	20	20	18
LOC100578526	32	120	71	57	107	96	82	57	20	98	99	140	121	110	98	105	108	105	105	91	91	117	93	78	106	47	44	39	57	47	106	107	232	217	157	154	129	162	131	26	65	20	41	55	51
LOC100578529	29	69	96	79	90	101	97	91	40	62	78	69	149	97	107	96	189	207	170	192	175	88	86	39	200	50	61	48	63	72	270	223	533	301	274	361	228	228	153	56	64	39	48	98	63
LOC100578530	14	48	33	23	79	28	70	45	19	39	32	81	105	75	97	86	46	55	44	56	38	136	63	47	47	29	19	8	17	21	59	73	72	101	47	107	86	79	47	15	31	11	14	14	19
LOC100578532	22	69	27	18	27	15	32	24	34	48	67	56	30	30	17	42	55	14	40	24	15	43	18	35	55	15	10	18	31	19	50	19	91	84	31	34	32	166	19	5	66	18	25	19	18
LOC100578534	168	370	186	177	327	203	280	302	143	242	299	543	305	362	309	330	207	138	194	161	107	432	273	313	133	98	47	65	99	56	375	199	319	216	216	299	249	344	137	42	133	45	69	84	35
LOC100578537	30	62	75	42	87	83	76	47	35	66	100	85	126	100	81	83	155	146	129	141	100	91	97	43	126	91	42	51	83	57	75	154	306	259	212	229	152	127	118	49	97	71	77	87	40
LOC100578540	7	9	8	9	4	11	10	10	2	5	20	10	26	23	12	14	19	11	25	20	15	15	16	6	23	9	7	14	67	10	24	18	35	38	14	32	13	29	22	9	31	119	22	9	11
LOC100578542	15	13	15	16	47	17	19	2	12	22	49	21	45	23	19	21	32	29	33	27	33	19	32	11	17	4	2	1	7	5	7	19	57	41	26	40	33	13	13	1	6	6	18	9	8
LOC100578543	0	1	2	0	1	1	0	0	0	2	0	0	1	0	0	0	1	0	1	0	0	0	0	0	0	0	0	0	0	0	0	0	2	2	0	0	0	0	0	0	0	4	2	0	0
LOC100578546	27	80	61	71	101	87	84	54	33	77	72	128	130	113	99	104	111	116	86	90	92	145	120	71	119	36	24	23	32	51	83	95	180	144	134	153	115	103	101	17	77	35	45	52	21
LOC100578547	248	369	340	440	432	352	364	231	78	199	399	479	583	490	334	372	528	434	499	566	379	345	470	288	425	207	187	106	213	146	737	399	1185	690	675	692	517	786	322	77	244	74	81	167	106
LOC100578548	17	59	41	17	19	52	41	26	2	31	27	101	36	67	54	63	55	21	18	11	14	43	46	43	30	12	7	3	6	7	43	43	88	54	35	33	44	122	33	2	16	2	2	9	3
LOC100578551	177	599	285	463	531	508	721	423	41	407	590	776	870	797	636	845	439	327	361	289	326	757	590	497	274	162	68	113	133	74	687	454	769	457	414	530	501	566	313	70	149	121	131	89	62
LOC100578556	31	66	117	127	86	143	112	44	51	122	200	170	257	193	150	102	279	373	337	378	329	168	167	71	318	107	116	107	186	160	99	362	645	589	460	603	268	116	281	149	146	167	237	174	161
LOC100578557	52	53	84	74	93	65	50	20	21	57	72	87	95	103	42	50	224	121	103	97	97	85	90	41	88	58	32	23	27	71	58	98	193	189	174	185	155	129	138	30	40	29	38	45	51
LOC100578559	19	55	45	35	63	38	64	36	15	49	46	66	85	87	97	87	74	73	76	75	54	73	65	34	63	33	25	23	43	25	55	95	142	118	96	149	69	65	75	21	49	17	46	45	14
LOC100578560	170	663	280	344	606	321	334	368	153	364	448	703	473	589	423	529	292	197	225	230	174	704	363	362	191	123	69	91	109	57	423	219	520	333	291	357	349	393	222	44	176	65	67	105	59
LOC100578561	0	0	1	0	0	0	0	0	0	0	0	0	0	0	2	1	0	0	0	0	1	0	0	0	0	3	0	0	1	0	0	0	1	0	1	0	1	0	0	0	0	1	0	0	0
LOC100578562	0	0	0	1	0	0	0	0	0	0	0	0	0	0	0	0	0	0	0	0	0	0	0	0	0	0	0	0	0	0	1	0	0	0	0	0	0	0	0	0	0	1	0	0	0
LOC100578563	11	20	37	35	42	31	24	13	6	29	46	46	76	52	44	36	57	76	51	86	63	23	46	20	56	17	23	21	30	36	35	115	137	109	101	207	58	23	60	10	26	8	27	40	27
LOC100578566	6	10	12	14	15	25	15	9	2	17	18	7	19	12	15	18	10	15	10	10	14	11	22	8	11	6	1	3	3	4	26	10	51	19	14	27	12	13	9	3	3	6	11	9	10
LOC100578571	0	1	4	2	8	1	2	3	10	10	50	4	7	10	7	7	7	10	9	10	5	6	2	4	26	28	12	0	7	11	0	4	15	2	11	3	8	7	2	2	1	10	1	3	16
LOC100578575	4	43	29	23	33	28	30	17	11	47	25	44	54	65	47	44	49	38	56	70	38	51	57	26	41	27	16	37	28	13	28	47	77	72	55	60	58	30	31	13	49	6	26	18	14
LOC100578576	0	2	5	7	0	1	1	1	0	2	0	4	2	2	1	0	5	0	2	3	5	3	1	0	0	0	2	1	1	1	1	1	3	4	5	7	4	4	0	1	0	2	2	1	0
LOC100578579	285	393	676	738	703	507	454	165	432	545	851	371	1382	786	568	473	1453	1573	1002	1461	1604	887	681	412	1422	652	717	633	1032	858	437	1311	2824	2073	2094	1704	999	860	1087	871	760	863	1028	1236	864
LOC100578580	32	77	74	64	83	71	93	41	28	83	70	106	81	92	73	92	83	71	75	56	43	107	75	64	66	30	13	19	34	30	86	74	157	107	78	107	96	95	62	17	49	21	17	20	7
LOC100578581	37	143	81	112	116	131	157	77	38	142	90	195	247	194	146	198	133	126	100	81	90	248	150	119	78	38	26	22	24	29	96	150	207	116	107	190	193	99	114	23	44	23	23	30	27
LOC100578586	18	93	110	95	79	54	72	27	23	137	252	154	242	198	210	121	250	239	303	249	369	186	200	71	96	62	53	39	80	99	60	322	272	255	426	336	391	53	465	109	97	113	138	40	124
LOC100578587	4	19	17	20	10	13	13	3	5	15	15	31	12	26	22	17	16	38	6	14	21	13	29	9	39	14	6	11	8	9	16	45	58	74	51	74	42	10	29	1	10	2	0	21	8
LOC100578592	0	0	0	0	0	0	0	0	0	0	0	0	0	1	0	0	0	0	0	0	0	0	0	0	0	0	0	0	0	0	0	0	0	0	0	1	1	0	0	0	0	0	0	0	0
LOC100578597	106	187	260	254	238	265	287	170	141	202	341	368	413	414	307	267	459	540	532	575	474	292	288	145	421	186	145	135	184	238	373	574	1146	831	759	871	541	437	464	143	204	145	145	237	193
LOC100578600	152	246	364	270	306	193	266	90	110	275	384	167	525	448	305	243	544	623	355	421	680	481	374	316	347	146	120	93	166	218	173	665	1174	803	619	811	631	227	524	106	178	174	196	164	178
LOC100578602	84	172	143	140	276	268	230	117	90	300	354	406	410	358	222	280	601	459	418	377	288	268	289	193	351	109	101	88	124	149	273	363	573	552	526	461	464	448	333	75	236	60	122	114	98
LOC100578606	85	72	76	54	135	63	62	17	80	74	132	103	99	65	51	56	143	105	87	123	87	104	86	40	114	41	50	72	91	44	79	96	290	297	148	115	78	136	97	49	100	68	117	84	64
LOC100578609	2	2	3	2	0	3	4	2	4	0	4	0	6	1	0	0	4	2	6	1	2	2	2	1	0	0	0	1	0	0	1	8	12	3	2	5	3	5	6	0	0	2	0	5	2
LOC100578611	10	9	29	25	21	20	9	5	4	20	35	11	36	18	18	17	28	51	26	36	55	23	29	6	26	8	11	16	12	13	10	37	94	51	46	69	34	11	32	7	12	11	11	22	21
LOC100578613	14	17	19	16	23	10	24	12	12	24	22	25	21	36	27	20	17	30	19	12	23	34	8	18	50	11	11	5	21	10	33	37	70	43	37	59	37	19	28	14	21	5	17	23	7
LOC100578614	1	3	9	2	4	3	12	3	2	5	4	2	2	2	2	4	0	2	2	6	2	0	2	0	11	0	4	0	2	1	2	1	10	3	5	7	0	2	1	0	2	0	3	6	1
LOC100578617	0	3	11	5	1	2	7	1	0	1	2	1	1	1	3	1	9	7	6	4	3	7	2	2	6	8	2	3	2	3	2	5	10	5	7	13	6	4	8	1	3	7	15	8	2
LOC100578618	40	81	107	80	90	155	71	58	26	107	82	194	30	32	65	67	42	43	62	62	53	44	60	57	25	39	23	26	40	5	164	25	118	124	88	60	32	144	37	8	32	24	6	33	28
LOC100578621	195	241	490	492	342	218	249	50	373	335	578	141	544	340	273	221	588	819	541	579	781	487	501	181	573	193	207	236	306	284	102	585	1459	982	806	734	580	274	556	298	303	258	384	292	252
LOC100578624	90	312	217	200	243	178	264	210	78	190	186	385	243	286	298	324	222	199	217	173	170	308	245	193	175	145	66	67	92	78	282	237	449	330	284	416	355	296	228	47	147	58	63	106	55
LOC100578625	0	0	0	0	4	0	0	0	0	0	0	0	1	2	0	0	1	0	2	0	0	1	0	1	0	0	2	0	0	0	0	0	1	0	0	0	0	2	0	0	0	1	2	0	0
LOC100578628	31	94	42	49	89	57	57	41	18	79	64	118	82	98	92	119	61	34	42	74	45	113	71	56	49	39	11	13	28	14	86	52	113	77	80	94	72	98	41	8	45	13	20	22	20
LOC100578629	24	97	57	96	131	69	97	51	35	87	104	145	132	132	131	131	108	109	97	104	101	151	129	73	72	44	39	23	48	28	60	87	212	163	124	135	131	98	119	18	83	32	36	57	18
LOC100578631	55	84	249	156	123	118	91	24	91	120	148	113	247	230	110	92	259	519	246	383	531	258	221	133	274	80	112	93	159	126	69	351	657	415	360	422	344	145	382	154	97	164	202	144	155
LOC100578641	5	20	6	1	23	6	12	10	3	14	12	24	19	21	21	18	17	7	14	16	11	11	6	10	12	5	9	5	4	6	10	30	36	18	19	26	18	23	7	3	8	8	15	9	4
LOC100578649	1	3	1	3	3	4	1	3	0	1	3	5	0	2	6	4	4	3	2	4	0	1	0	1	1	1	0	0	3	1	3	4	5	6	1	4	2	2	0	0	1	0	1	0	0
LOC100578651	0	3	2	2	0	0	0	0	2	0	0	1	0	0	1	1	0	1	1	2	4	1	1	0	2	0	0	0	0	0	1	1	3	2	4	1	4	2	0	4	2	1	7	1	2
LOC100578653	77	223	147	120	198	119	225	153	90	176	147	235	257	255	243	256	196	163	165	157	126	238	297	88	135	102	40	45	63	61	215	231	358	259	224	294	275	229	164	46	93	56	69	57	37
LOC100578654	15	36	59	31	51	41	24	11	21	32	45	40	41	42	29	36	43	54	35	46	41	28	45	19	40	15	8	14	15	21	25	50	116	50	40	51	40	38	47	10	38	11	14	24	9
LOC100578660	405	660	804	1300	973	1460	1360	1451	501	565	1165	998	1438	910	1050	1246	1102	1175	1246	1242	1259	1069	1290	779	1161	743	423	379	601	510	2735	1641	2638	1544	1369	2064	1968	2684	1001	552	1092	663	843	657	436
LOC100578661	80	208	257	187	273	208	224	140	111	179	235	358	355	350	315	286	404	579	423	501	452	264	255	145	515	144	167	117	256	190	296	604	1245	1031	689	960	548	387	507	264	208	181	246	292	225
LOC100578662	19	26	37	34	39	29	19	18	13	32	44	49	41	22	26	28	52	47	48	33	40	34	40	24	73	25	16	13	41	34	18	46	81	83	76	86	45	45	34	15	47	22	17	38	27
LOC100578664	48	139	80	97	114	83	45	21	34	81	119	123	134	56	44	53	132	110	144	119	97	137	95	121	313	109	129	100	92	83	67	79	420	264	333	131	95	244	77	48	140	42	55	205	128
LOC100578665	118	123	203	150	163	154	215	196	137	120	191	152	232	281	199	164	315	290	289	230	250	176	233	141	206	99	74	62	114	113	462	304	641	404	301	425	384	544	206	73	125	86	107	118	90
LOC100578666	3	3	5	3	18	2	7	2	0	0	1	5	6	1	5	7	10	3	1	3	1	5	9	4	13	10	6	6	2	4	10	5	10	12	7	9	4	11	7	5	2	1	5	8	3
LOC100578668	3	0	2	1	0	1	0	3	0	4	3	4	4	4	2	0	8	2	7	1	0	2	6	1	3	1	1	1	0	1	3	2	3	1	0	1	0	4	4	0	0	1	2	1	0
LOC100578672	0	3	4	4	1	0	1	1	1	3	7	2	7	5	1	3	3	1	4	0	3	10	0	2	1	0	2	0	6	8	2	9	24	3	4	12	1	3	2	1	2	0	1	2	7
LOC100578674	13	38	36	36	58	59	91	74	21	48	58	70	98	98	102	133	79	77	104	83	56	59	67	51	66	40	24	17	27	25	175	113	190	122	107	193	130	151	74	20	45	20	22	41	20
LOC100578680	253	497	712	671	705	702	875	562	231	438	683	647	1143	952	839	824	1194	1062	1342	1105	1097	655	752	483	1067	516	361	308	495	498	1322	1294	2864	1728	1673	1911	1625	1619	1088	477	481	495	639	582	468
LOC100578684	109	356	186	264	399	266	334	251	129	290	334	465	432	434	316	452	292	230	191	198	215	573	315	390	184	124	59	60	86	59	339	242	445	295	280	319	294	271	204	30	117	64	85	69	50
LOC100578685	2	3	2	2	4	2	3	1	0	2	1	0	1	0	3	2	4	2	0	1	5	3	2	1	4	1	1	0	0	1	1	2	6	0	2	2	7	2	3	3	4	1	2	1	0
LOC100578691	6	16	22	10	30	8	29	30	3	15	15	38	28	24	44	38	12	14	30	21	18	19	20	11	26	10	4	8	16	15	28	25	74	70	52	69	48	37	30	13	16	10	16	11	6
LOC100578694	67	263	179	135	292	224	251	154	40	158	240	261	262	225	293	345	265	230	245	222	235	268	191	112	215	92	102	95	136	105	208	361	593	373	370	527	369	225	260	86	155	83	144	111	81
LOC100578696	20	41	43	86	62	90	46	22	28	60	75	58	169	78	47	31	109	139	82	154	122	72	76	42	93	32	48	42	51	53	32	93	235	200	112	167	72	56	89	41	64	62	79	75	46
LOC100578697	362	616	409	543	633	509	649	612	484	564	646	1094	834	741	692	1006	480	420	450	389	309	1215	802	675	446	285	141	133	233	169	1041	584	929	572	484	777	682	1338	439	87	372	128	151	231	97
LOC100578698	7	14	18	18	12	8	13	1	4	10	29	23	12	17	16	8	46	26	11	25	21	26	23	16	19	4	5	7	10	16	7	32	45	33	35	26	23	4	18	17	7	1	1	13	20
LOC100578699	0	1	0	5	6	4	1	1	1	0	5	3	7	4	2	4	11	10	6	14	6	2	1	0	1	6	0	0	3	13	1	5	17	2	5	5	2	2	3	1	5	3	4	3	4
LOC100578703	13	41	7	32	17	57	26	12	7	16	36	36	34	41	29	24	48	27	31	34	34	25	32	23	25	23	13	10	87	7	15	24	54	47	32	50	54	35	39	8	31	26	14	13	9
LOC100578704	14	28	30	17	36	28	37	2	13	34	25	44	42	60	33	35	25	26	38	46	38	38	39	23	32	26	9	20	23	11	34	53	108	58	37	49	54	41	16	12	24	17	12	17	15
LOC100578705	57	105	319	218	195	221	196	169	181	149	354	169	523	325	216	215	537	812	576	1083	719	255	242	101	708	118	211	183	196	360	492	928	1971	1142	1295	1498	557	560	528	201	140	235	367	378	288
LOC100578706	84	123	169	189	178	259	171	121	123	143	240	218	266	226	183	176	314	359	292	282	339	225	212	105	350	94	105	84	107	160	235	307	499	442	402	410	349	361	227	116	104	125	152	128	114
LOC100578708	115	312	188	263	204	266	238	171	163	152	217	390	290	295	247	287	335	302	264	284	293	326	227	239	300	254	118	99	183	116	291	287	713	501	451	358	393	673	291	94	273	100	125	150	134
LOC100578709	134	216	228	269	286	350	225	92	125	377	430	387	374	396	189	190	560	403	401	469	422	403	412	268	414	216	173	217	277	220	197	370	817	713	482	416	382	274	380	168	347	307	378	304	259
LOC100578713	84	347	129	187	302	170	271	212	45	237	176	347	346	315	311	386	190	177	185	126	119	389	245	223	96	84	33	36	67	40	226	183	288	217	181	260	262	232	142	30	101	43	51	45	30
LOC100578714	12	14	17	22	38	29	18	29	11	15	33	23	43	26	19	19	40	24	21	43	19	22	33	19	13	16	10	14	28	3	42	37	63	33	31	28	35	30	30	7	25	28	61	11	6
LOC100578715	8	30	23	21	23	24	21	12	9	35	49	47	41	36	28	28	41	46	41	43	33	43	40	31	44	19	9	13	21	18	26	52	86	73	59	84	54	29	40	12	39	21	41	30	11
LOC100578716	362	454	521	771	642	389	418	199	127	376	638	697	844	766	335	386	830	893	759	1000	643	584	601	336	722	253	324	209	328	258	599	659	1912	1189	1035	1186	706	759	494	130	382	108	118	268	232
LOC100578718	10	17	47	65	50	45	40	8	9	51	76	37	76	40	18	23	70	86	41	65	85	29	51	24	53	18	12	34	24	17	26	62	108	42	58	76	59	43	44	29	18	50	53	25	26
LOC100578719	0	5	5	5	2	7	4	1	0	8	1	3	3	9	0	2	2	3	5	5	4	2	5	2	0	2	2	3	2	1	3	7	12	9	5	9	1	5	23	2	4	7	2	1	1
LOC100578721	22	78	101	87	88	82	77	42	38	105	116	140	132	135	96	71	149	166	150	145	132	136	131	59	167	72	57	56	77	61	70	165	361	254	233	243	188	140	142	71	114	79	109	86	50
LOC100578723	44	141	104	90	171	98	141	77	72	122	126	229	149	190	168	200	170	121	141	122	101	245	187	106	142	105	35	36	62	78	155	154	310	269	217	242	184	212	144	29	109	41	48	80	58
LOC100578724	2	9	5	5	11	7	2	2	0	1	1	2	9	4	2	3	10	3	6	7	1	6	4	2	5	5	0	0	3	2	6	2	6	10	13	4	5	2	5	0	2	1	4	1	0
LOC100578725	157	450	202	255	364	336	367	276	175	304	355	588	468	529	405	499	296	206	272	245	208	539	413	309	208	98	46	80	84	71	487	281	479	337	300	337	355	436	221	38	106	62	67	64	56
LOC100578726	8	30	13	14	50	16	32	22	2	12	15	34	30	32	51	47	28	22	20	31	22	24	29	12	24	11	2	4	18	18	46	29	53	53	47	70	36	33	26	12	11	10	10	17	8
LOC100578727	12	17	24	25	31	22	13	8	12	27	29	23	38	43	31	22	50	45	38	41	67	34	29	23	50	23	17	35	21	44	11	36	62	70	72	53	48	30	32	11	27	36	41	22	30
LOC100578729	1	0	0	0	0	0	0	0	0	0	0	0	0	0	1	1	0	0	0	0	0	0	0	0	0	0	0	0	0	0	0	0	0	0	0	0	0	0	1	1	0	0	1	0	0
LOC100578730	1	1	3	0	1	3	0	1	0	0	2	3	6	1	1	2	1	1	0	2	0	1	2	3	1	1	0	0	0	0	1	0	3	4	7	1	1	2	2	0	1	0	3	0	0
LOC100578731	584	1238	1031	1038	728	936	1383	898	1122	627	741	1487	1104	1735	1609	1649	1109	1140	914	1369	849	1348	1354	1321	4282	2275	953	1308	2204	1319	1614	991	2745	3744	3536	2225	1618	9085	1299	534	2465	707	1109	1395	1057
LOC100578732	0	0	0	0	0	0	1	2	0	0	0	1	0	3	0	1	1	1	0	0	1	1	0	0	1	0	1	0	0	0	1	0	2	0	0	2	0	0	0	0	0	0	0	0	0
LOC100578733	85	228	157	147	172	188	167	166	39	156	110	303	175	212	221	242	461	217	111	135	280	190	178	159	126	107	90	62	82	55	212	245	321	316	257	375	382	249	344	43	132	35	56	137	42
LOC100578734	151	150	73	164	301	204	341	229	89	144	121	366	402	284	249	377	149	89	157	94	96	322	218	204	79	45	31	28	39	30	353	140	243	151	183	222	185	307	121	19	59	34	39	39	24
LOC100578735	0	2	3	0	0	1	1	0	0	0	1	0	2	0	1	3	1	2	2	0	2	0	2	1	2	1	0	0	0	0	2	1	5	0	4	5	1	2	0	0	0	1	0	0	2
LOC100578736	35	120	104	93	131	98	102	52	35	99	136	149	146	139	136	117	115	153	116	130	107	123	118	76	150	53	44	52	56	69	77	143	268	220	211	236	133	113	115	42	102	45	60	59	29
LOC100578739	6	9	14	13	16	13	6	11	5	22	19	13	12	14	6	6	23	24	17	22	19	14	16	8	11	11	5	6	4	8	19	21	32	33	13	29	19	12	13	2	10	5	6	5	9
LOC100578743	29	37	65	54	63	67	46	19	25	60	79	74	112	97	50	40	117	117	129	97	146	70	77	53	96	29	27	37	71	47	33	122	213	104	136	173	111	53	131	32	55	66	64	53	43
LOC100578744	0	15	5	3	2	5	8	3	10	3	16	1	6	7	5	5	14	6	2	10	14	9	7	4	9	6	1	7	5	3	3	13	27	17	11	8	11	10	6	7	9	1	12	5	7
LOC100578745	69	112	182	104	127	124	120	46	120	105	144	285	124	129	121	126	251	280	219	212	140	187	198	178	261	124	69	55	87	77	158	234	574	401	352	325	280	392	234	28	81	17	45	94	53
LOC100578746	6	19	17	20	28	32	48	23	13	33	35	29	35	75	34	41	22	32	27	20	28	31	32	23	21	17	13	8	16	17	44	50	70	91	47	57	56	36	13	7	15	8	15	22	13
LOC100578751	0	1	2	1	3	0	0	0	0	0	1	0	0	1	0	0	4	1	0	0	1	2	2	0	2	2	0	0	1	1	3	0	4	2	2	2	4	0	1	0	0	0	4	2	1
LOC100578752	12	33	39	35	34	41	51	20	10	38	67	47	66	64	29	34	56	41	64	53	44	30	53	28	63	10	16	13	36	18	16	54	116	64	64	91	72	39	50	12	16	24	15	28	19
LOC100578763	83	390	194	224	335	228	351	272	102	310	258	471	418	411	368	419	250	223	219	205	209	575	335	272	211	116	54	82	97	88	257	371	558	285	300	425	423	299	259	37	139	40	48	100	44
LOC100578769	192	250	320	330	320	287	281	116	199	240	387	323	443	329	209	208	373	287	317	334	332	291	279	262	348	226	169	141	275	178	203	253	782	655	499	501	380	471	304	171	236	192	308	222	165
LOC100578770	25	39	50	42	47	30	58	21	30	31	42	22	45	134	73	58	63	79	53	56	103	84	77	46	76	39	29	15	24	30	44	155	173	148	138	146	165	72	115	21	29	16	41	47	45
LOC100578773	18	34	39	38	74	50	49	43	9	63	45	65	101	61	74	62	79	58	75	91	60	75	84	35	70	36	21	33	33	28	99	72	169	136	101	128	100	116	59	22	38	38	46	47	28
LOC100578774	131	99	253	232	215	127	148	22	199	185	318	176	359	285	155	124	395	615	344	678	619	417	321	137	607	142	234	113	208	317	147	445	1083	659	682	776	361	238	407	160	178	78	108	545	255
LOC100578776	44	59	101	118	44	67	82	20	49	72	92	61	110	193	102	78	155	197	181	148	175	63	90	64	123	32	35	44	89	29	40	184	194	180	108	315	204	65	127	44	27	43	65	50	24
LOC100578779	2	7	11	9	19	7	18	10	1	8	12	13	24	22	24	19	11	10	17	19	6	11	9	6	10	4	8	4	7	5	6	23	35	25	19	28	14	4	13	3	12	4	5	2	4
LOC100578780	2	4	8	6	17	6	4	1	6	12	16	5	12	5	4	5	22	15	10	8	10	4	8	2	12	2	1	0	4	2	2	4	20	13	10	11	9	4	7	4	4	6	1	5	3
LOC100578782	609	2322	1059	1783	2030	974	2518	1600	698	3222	2575	3840	6136	4706	2591	3938	2687	1964	2417	1940	2548	5479	3485	2843	897	397	239	426	474	263	2719	2574	3738	2940	2901	2396	3138	2878	1906	148	794	366	573	287	193
LOC100578783	1	1	8	10	2	30	4	10	15	2	4	2	16	5	7	6	21	8	13	22	13	5	10	2	12	6	4	9	27	6	28	18	41	24	15	21	13	23	13	7	10	13	6	17	8
LOC100578797	13	29	50	26	50	37	19	6	12	50	78	64	48	23	20	21	48	45	32	37	27	32	35	34	41	23	15	19	23	21	29	29	63	79	50	53	25	63	19	14	44	26	22	21	13
LOC100578798	0	0	0	1	0	2	0	3	0	1	0	0	0	1	0	0	0	0	0	0	0	0	0	6	0	0	0	1	0	0	68	0	64	9	1	0	0	1	0	0	0	1	0	0	1
LOC100578801	4	9	8	5	6	6	13	7	5	4	5	5	9	10	9	7	10	12	16	13	8	9	8	6	10	3	2	3	8	3	4	13	17	20	13	25	23	16	16	1	13	5	8	8	4
LOC100578805	33	120	71	49	101	45	91	74	48	64	84	111	118	126	104	108	97	71	74	89	67	80	93	48	42	40	21	29	39	40	137	120	228	128	119	176	93	108	77	19	64	19	22	46	23
LOC100578810	2	3	15	8	9	9	5	1	8	10	14	5	34	19	4	6	13	31	15	26	26	9	12	4	13	4	8	1	7	14	8	37	46	13	17	24	26	9	8	5	8	4	7	11	10
LOC100578811	66	111	50	65	133	62	119	123	72	120	78	239	163	214	142	258	80	67	66	47	81	186	125	125	42	27	16	6	13	27	172	104	142	80	94	151	111	147	77	9	31	10	16	13	12
LOC100578813	13	9	24	13	4	10	4	0	11	9	13	5	7	11	8	4	16	42	15	30	24	17	10	4	25	11	9	12	14	12	5	19	41	27	24	38	22	9	14	18	10	22	18	13	17
LOC100578814	1	5	4	14	18	23	13	13	0	10	6	16	19	8	8	22	18	6	9	11	10	6	54	6	6	8	4	20	21	3	8	11	175	38	11	14	16	6	6	11	9	25	17	10	7
LOC100578816	119	449	551	32	56	25	394	46	253	132	105	363	132	31	33	31	99	37	1173	405	46	60	118	35	476	73	563	259	171	240	1913	37	204	262	126	95	69	129	114	103	437	103	98	297	305
LOC100578818	40	35	128	101	64	53	48	14	69	95	133	57	130	78	44	38	194	232	152	228	223	137	73	29	210	45	113	95	127	120	23	155	377	273	262	250	92	48	169	151	86	127	228	148	152
LOC100578820	10	33	21	15	30	20	14	22	10	21	22	40	32	33	28	27	47	34	30	30	24	29	30	11	44	14	14	17	38	20	30	41	80	57	62	65	28	34	55	12	40	23	34	20	19
LOC100578821	4	4	4	7	8	4	18	11	3	8	8	14	11	11	11	10	7	8	9	3	8	7	10	6	4	5	3	3	6	4	10	15	28	20	17	23	21	11	10	2	4	4	7	7	1
LOC100578822	38	34	74	54	79	97	46	35	39	47	94	55	83	61	52	48	103	99	76	87	71	61	62	23	79	24	26	23	41	30	71	87	218	79	86	99	86	85	56	28	48	44	49	38	31
LOC100578823	34	132	130	112	184	102	154	100	81	117	126	198	191	195	246	204	198	220	177	210	178	174	156	47	221	107	75	49	98	99	189	319	663	382	360	539	238	234	214	54	156	68	75	106	87
LOC100578824	3	11	24	12	7	7	3	2	3	6	11	8	15	13	7	5	27	27	10	21	19	16	10	8	21	8	12	2	7	6	3	31	81	41	24	39	32	13	25	10	9	3	7	13	16
LOC100578826	91	72	220	200	214	226	128	26	121	237	369	297	367	276	175	113	441	690	407	584	689	310	233	80	475	95	143	167	262	262	47	525	871	843	686	757	446	76	521	177	215	202	280	221	172
LOC100578828	52	74	102	140	62	118	94	56	52	77	154	154	141	179	130	116	174	166	169	157	205	134	138	129	153	89	45	48	78	77	97	182	354	254	249	243	207	130	161	37	83	83	77	80	54
LOC100578829	1	13	4	4	2	9	5	3	4	2	4	3	20	6	2	1	4	14	5	1	3	2	10	5	2	9	2	3	5	2	4	3	4	6	6	7	20	18	13	3	4	0	1	11	1
LOC100578833	2	3	13	4	12	10	9	8	4	12	10	11	15	14	16	12	9	11	20	24	13	4	12	4	20	6	5	4	9	7	15	15	34	27	20	31	21	12	11	0	13	7	13	13	5
LOC100578834	9	33	41	32	27	23	38	8	12	46	59	44	60	47	47	38	52	35	43	40	26	42	46	31	36	17	11	11	21	19	13	32	67	80	75	74	43	26	27	13	36	13	19	17	16
LOC100578842	0	0	0	1	0	0	1	0	0	0	0	0	2	1	0	0	2	3	2	1	0	0	0	0	0	1	0	0	0	0	0	0	0	0	1	0	0	0	0	1	0	2	0	0	0
LOC100578852	12	30	36	33	43	21	56	20	19	21	35	51	73	45	32	36	58	28	43	44	37	54	34	23	51	30	24	28	38	25	49	44	96	68	82	82	69	54	37	31	66	47	61	53	24
LOC100578853	45	127	93	89	165	118	134	85	54	124	137	236	258	170	179	247	165	148	135	141	130	293	184	99	113	72	36	67	82	62	187	180	285	238	188	233	217	173	139	29	76	60	53	65	39
LOC100578854	20	39	44	37	57	38	37	8	22	29	42	36	49	32	17	24	52	87	46	67	61	34	39	22	56	20	18	15	13	25	48	52	188	85	66	92	37	50	30	19	32	11	16	41	20
LOC100578860	0	0	0	0	0	0	0	0	0	0	0	0	0	0	0	0	0	0	0	0	0	0	0	0	0	0	0	0	0	0	0	0	0	0	0	0	0	0	0	0	0	0	0	0	0
LOC100578862	0	3	2	0	0	2	1	1	2	0	1	3	1	2	2	3	2	1	4	4	2	3	0	0	2	1	0	1	1	3	2	5	3	15	3	1	1	6	3	1	1	2	6	4	2
LOC100578864	81	218	136	140	284	176	200	178	107	200	217	391	270	293	302	340	193	153	237	168	141	284	189	148	158	120	76	66	123	78	248	188	296	289	252	312	227	327	167	53	150	86	92	107	63
LOC100578865	25	58	74	71	29	27	43	5	99	31	85	19	85	74	57	45	77	135	56	96	143	109	63	47	140	38	65	49	75	59	10	126	276	290	197	192	103	32	104	80	60	41	79	146	68
LOC100578875	51	88	109	70	128	84	93	73	43	75	107	130	147	142	119	111	123	137	136	117	103	91	129	80	131	58	42	40	68	57	179	182	286	180	190	225	177	208	102	40	81	46	62	70	40
LOC100578877	10	14	23	21	39	15	13	8	12	24	26	6	39	21	13	7	34	45	23	25	31	24	20	16	13	9	6	4	5	5	9	27	72	35	25	42	16	18	11	4	11	8	16	15	8
LOC100578879	38	99	151	142	171	210	140	80	37	132	200	179	286	253	151	179	296	358	286	321	349	188	193	84	257	112	84	73	128	117	156	298	586	467	450	446	274	213	315	92	108	147	196	136	106
LOC100578881	12	15	6	10	20	18	9	4	1	9	30	9	13	7	10	16	8	4	15	8	3	12	16	18	11	27	27	9	17	10	13	6	20	17	14	11	8	17	12	8	11	5	10	21	3
LOC100578883	18	43	59	61	44	83	49	16	24	68	114	107	116	73	52	48	150	181	112	162	189	81	73	26	163	34	39	43	63	84	19	153	262	221	218	235	159	42	146	50	55	61	93	61	53
LOC100578885	12	33	93	58	95	62	32	13	34	58	126	85	115	80	34	21	145	229	115	217	170	91	69	23	194	30	100	86	124	96	21	159	310	262	285	232	73	34	129	138	50	170	202	135	88
LOC100578886	0	0	1	1	0	0	0	0	2	2	0	2	0	2	2	2	0	0	3	1	1	0	2	1	0	1	0	0	1	1	0	0	1	0	2	2	0	1	0	0	1	0	1	1	0
LOC100578888	4	9	37	22	26	16	10	7	12	27	43	35	46	52	26	18	66	82	50	62	76	31	27	16	79	9	23	17	20	17	9	74	113	96	99	110	41	8	61	17	19	15	14	32	26
LOC100578890	61	172	82	146	185	156	166	153	33	167	148	335	251	304	198	295	188	127	135	139	92	390	265	187	109	77	40	47	54	59	180	174	254	135	135	240	202	175	127	18	94	29	50	48	24
LOC100578892	33	138	77	63	137	78	99	74	55	107	113	193	140	142	148	183	102	78	66	88	71	133	132	86	88	78	33	41	46	32	148	135	257	131	142	201	133	172	79	23	73	20	41	74	27
LOC100578893	190	471	358	363	418	411	330	187	251	341	410	688	493	591	449	408	571	641	503	556	381	577	564	376	630	282	196	166	273	214	468	591	1423	1172	940	1185	787	978	744	122	399	127	139	297	141
LOC100578894	1	6	2	10	7	10	4	5	1	8	6	8	11	7	9	10	10	5	10	16	4	12	10	7	5	5	4	5	3	1	8	13	22	11	22	21	11	14	12	2	8	3	9	11	7
LOC100578899	83	117	349	307	277	370	188	53	193	309	661	211	664	420	240	173	911	1375	857	1795	1527	329	316	167	1006	282	547	507	592	523	133	943	1321	1363	1188	1117	642	199	817	642	276	451	645	680	588
LOC100578901	19	34	29	28	31	54	34	25	29	34	53	64	50	79	58	56	97	80	84	89	76	52	54	25	79	36	22	11	34	29	55	126	182	129	130	127	107	84	79	24	48	14	23	24	16
LOC100578907	41	99	108	108	100	81	104	74	50	108	109	174	151	195	152	118	226	222	172	139	238	151	132	96	165	68	61	55	75	69	85	250	306	300	183	283	279	178	207	57	103	38	62	78	54
LOC100578909	105	393	386	345	398	402	381	225	200	373	500	510	629	650	546	486	667	643	682	649	517	578	525	297	556	231	193	190	282	289	277	612	1382	1041	877	886	715	449	548	205	394	224	296	382	192
LOC100578910	29	98	69	18	97	49	59	39	53	109	66	168	74	118	67	86	39	33	30	21	25	79	46	43	26	28	9	5	11	11	52	50	90	39	54	138	31	62	32	9	21	5	7	12	11
LOC100578913	8	8	22	13	31	22	11	3	10	8	36	28	15	15	13	12	21	20	11	20	23	10	15	18	12	1	12	7	10	12	14	31	73	24	28	36	15	6	11	10	13	17	9	5	5
LOC100578919	0	4	0	0	4	4	2	3	2	1	2	0	2	1	0	0	0	2	6	7	0	1	0	1	1	3	0	2	1	1	2	1	4	1	2	4	4	5	2	1	13	9	6	2	0
LOC100578920	4	15	9	11	25	22	19	27	1	11	16	17	36	23	26	27	17	30	27	27	10	17	13	10	20	14	1	4	7	8	24	32	64	37	20	15	25	29	18	1	8	13	15	9	5
LOC100578921	102	431	178	181	259	223	270	220	102	315	358	427	326	412	249	376	243	180	208	162	206	414	283	292	158	104	57	68	71	53	324	181	370	370	251	246	311	271	188	44	118	35	71	71	38
LOC100578924	39	66	80	69	100	84	74	43	32	60	105	84	101	93	73	93	88	88	99	91	91	69	64	71	89	44	30	28	44	53	72	102	181	191	126	165	117	115	91	25	64	42	52	38	45
LOC100578925	118	144	587	537	237	307	183	57	251	268	676	172	1138	625	344	205	910	2132	945	2177	1908	576	505	146	1400	219	562	405	477	661	100	1676	2550	2045	1803	1978	869	165	1266	562	303	453	638	809	660
LOC100578927	136	295	377	420	386	414	316	141	150	357	569	514	474	411	318	259	581	522	458	420	558	564	462	354	464	230	173	217	347	220	201	469	850	769	583	689	534	335	434	240	387	292	365	291	224
LOC100578928	244	310	485	417	200	166	192	96	218	210	371	592	415	232	138	162	218	526	186	357	322	293	216	228	660	162	170	138	291	150	140	199	892	385	424	590	517	492	208	174	203	173	108	195	98
LOC100578929	153	428	425	554	421	291	310	132	246	258	295	316	486	725	468	396	320	495	241	210	535	325	536	404	310	101	64	74	114	175	293	561	829	577	584	810	500	430	418	37	107	94	115	233	123
LOC100578931	46	147	149	134	191	181	164	131	100	154	204	181	243	209	207	230	273	236	220	236	222	186	208	116	196	112	58	73	106	87	182	251	473	355	286	381	288	262	191	51	170	50	96	110	62
LOC100578935	4	19	15	8	28	18	15	14	1	14	21	33	39	17	21	20	34	19	41	17	19	16	18	9	23	14	5	2	8	10	25	27	42	35	35	45	45	57	26	1	8	2	1	8	3
LOC100578936	25	153	61	98	143	61	97	69	27	110	99	201	110	116	143	142	63	53	36	66	70	154	87	97	38	33	15	8	24	32	118	79	191	93	88	146	77	73	61	8	34	18	17	29	18
LOC100578937	151	366	303	302	370	404	384	261	171	299	412	513	433	465	494	466	505	375	425	464	394	465	411	298	387	223	146	163	247	175	477	513	1060	689	533	668	505	553	352	148	396	192	222	264	141
LOC100578939	17	46	92	74	51	69	43	4	33	42	123	47	66	42	48	32	107	108	124	122	143	62	65	60	174	53	49	94	98	102	12	107	185	128	150	167	102	41	85	128	91	189	172	124	132
LOC100578943	65	145	139	102	148	119	105	109	71	95	146	186	131	164	116	134	124	103	115	100	79	173	122	156	96	85	38	44	84	55	146	114	244	186	177	177	167	197	126	24	94	52	81	67	38
LOC100578947	107	245	210	225	273	257	282	315	120	157	207	294	290	338	326	377	348	328	321	290	264	177	250	118	316	152	81	100	169	106	477	366	744	542	431	622	399	555	327	92	197	112	124	180	100
LOC100578952	3	5	12	8	12	10	9	5	5	8	7	8	17	7	4	9	16	16	18	21	15	18	15	10	17	5	2	5	13	10	11	28	53	21	30	32	27	12	7	9	13	12	9	14	8
LOC100578953	38	66	161	141	176	142	113	24	55	151	170	176	195	196	118	89	235	268	295	265	290	196	169	102	254	71	75	89	125	128	54	318	622	414	331	354	153	78	178	82	108	62	136	139	93
LOC100578955	752	449	1047	1122	2481	3117	885	292	1324	1560	3187	1271	3624	1134	944	703	5009	4494	4878	5320	3929	1366	1379	573	2818	933	820	1196	1975	1457	527	2259	4590	7373	5702	2464	2132	1625	2051	697	1643	1532	2114	1588	1390
LOC100578957	6	6	9	13	21	9	6	3	6	5	14	13	18	12	5	3	19	7	19	16	18	13	12	7	13	5	3	1	3	7	20	11	36	8	19	20	13	18	10	6	5	2	8	7	8
LOC100578966	88	286	137	185	280	139	204	182	100	161	167	377	209	254	318	324	181	118	138	104	119	328	240	196	162	101	75	37	70	70	286	183	444	291	251	381	193	376	106	28	97	28	25	68	48
LOC100578975	12	49	29	36	45	45	57	46	28	67	35	68	92	73	61	82	76	68	74	69	65	68	69	26	49	26	30	13	25	24	126	118	157	106	100	106	103	87	58	30	32	17	28	37	20
LOC100578976	92	153	251	256	206	191	122	27	220	170	249	149	274	177	149	119	249	352	222	234	280	245	197	183	352	144	124	108	159	138	100	237	607	472	492	410	275	356	267	160	127	111	158	199	124
LOC100578978	1	1	3	4	3	3	0	1	0	1	1	1	4	1	2	0	11	5	2	2	4	2	2	1	2	2	1	0	4	0	3	3	8	12	6	5	2	4	4	2	2	0	0	0	2
LOC100578984	23	33	88	65	111	68	57	12	38	62	130	51	99	55	58	39	128	129	119	111	154	62	60	36	107	27	24	30	32	51	48	92	222	177	147	158	103	59	91	34	31	51	68	55	36
LOC100578988	9	32	25	39	42	22	29	21	27	20	48	39	44	40	44	40	26	27	44	61	35	44	30	30	38	24	13	12	21	11	44	42	92	62	62	63	42	57	46	10	38	17	24	29	8
LOC100578989	0	0	0	1	0	0	1	0	1	0	0	0	0	1	1	0	0	1	0	0	0	0	1	0	1	0	0	0	0	1	0	1	0	1	0	3	1	0	0	0	0	0	0	0	0
LOC100578990	13	25	50	35	19	26	54	20	23	16	34	22	51	72	64	40	48	88	43	38	78	49	42	38	32	12	11	11	8	23	102	111	152	47	81	206	90	30	41	8	6	9	13	24	11
LOC100578995	227	177	191	150	149	221	149	122	173	141	263	512	211	186	200	228	262	380	251	375	117	404	209	163	658	199	58	81	158	255	412	238	1431	721	237	423	310	529	229	31	189	56	74	167	154
LOC100578998	1	25	18	14	29	19	16	12	9	22	27	28	25	32	25	26	26	16	13	15	11	17	19	13	15	15	3	6	14	10	31	30	43	35	28	34	27	35	16	7	16	17	13	18	3
LOC100578999	16	30	17	22	40	26	42	21	2	31	23	40	57	38	38	32	26	20	34	24	21	17	32	14	28	16	6	13	30	15	58	37	62	74	67	51	47	43	32	10	20	14	22	12	10
LOC100579003	63	87	116	104	148	149	111	85	53	106	135	143	222	168	113	112	203	175	188	208	164	113	119	81	205	80	83	67	112	77	183	192	434	294	290	318	232	215	164	109	124	180	160	115	80
LOC100579005	8	3	5	2	10	4	1	4	1	4	9	4	1	9	6	4	2	7	8	5	6	8	5	6	4	2	2	4	3	2	4	5	20	10	9	5	13	8	8	0	3	2	3	6	3
LOC100579007	8	6	16	13	17	12	13	11	6	34	8	15	36	24	4	4	42	25	25	27	30	28	28	12	21	15	19	10	24	8	25	22	81	85	20	22	22	24	19	17	15	21	39	13	9
LOC100579008	6	24	25	17	24	19	35	14	10	27	14	25	21	50	50	37	22	23	8	23	9	31	17	24	17	11	5	7	16	14	22	37	55	40	24	37	35	33	22	5	15	16	16	16	8
LOC100579011	1	1	2	1	0	1	2	0	0	1	0	2	0	1	1	1	3	2	0	0	0	1	2	1	0	2	0	0	0	2	2	1	8	4	1	0	6	0	2	0	0	1	0	0	0
LOC100579015	23	137	89	70	108	52	92	48	37	91	97	134	125	144	159	143	156	137	80	115	126	135	139	92	113	50	45	35	57	60	89	176	351	188	214	329	138	101	187	21	76	29	31	59	26
LOC100579018	0	5	2	2	4	3	2	2	0	2	1	4	7	1	1	0	3	5	1	3	3	3	2	1	2	0	0	2	1	1	1	5	9	7	4	8	3	5	2	2	5	0	0	1	0
LOC100579019	14199	11503	21396	20778	34022	27533	8937	10267	8508	8375	16455	18894	23017	8011	12466	12020	17497	16680	18391	20449	16195	15487	16016	32413	46618	25596	17539	16788	24342	21471	12298	8538	43625	62546	72278	14505	10938	80621	8423	10475	36540	10117	14610	37027	19650
LOC100579021	73	127	72	68	114	77	143	134	79	127	118	164	125	151	102	166	114	76	107	65	62	184	131	148	92	29	19	40	42	36	193	95	230	168	96	123	151	195	70	15	76	10	36	42	16
LOC100579022	2	22	13	8	11	4	13	2	6	9	3	10	9	11	4	5	13	9	14	17	6	8	9	5	6	2	0	3	6	3	4	7	7	16	12	15	3	4	12	0	1	0	0	2	0
LOC100579024	100	298	158	134	251	167	260	205	170	225	178	364	301	370	268	354	210	153	176	151	161	417	276	171	110	90	46	42	45	44	435	220	373	184	200	307	297	265	158	38	71	36	47	64	35
LOC100579026	15	41	56	33	32	23	51	12	15	50	116	58	122	98	63	48	106	160	70	106	124	118	70	43	61	22	20	17	32	44	33	96	206	122	163	218	128	54	166	32	52	15	22	34	31
LOC100579031	2	9	11	4	3	5	8	5	2	18	5	13	5	5	10	14	6	5	6	7	3	12	2	5	9	10	4	11	17	5	21	12	12	9	11	12	4	16	6	7	25	15	15	4	9
LOC100579034	24	65	58	49	64	58	49	30	36	60	63	97	107	101	90	80	97	79	91	81	75	84	102	44	97	51	28	33	65	38	70	85	175	165	122	127	105	96	63	39	82	29	47	50	24
LOC100579038	51	238	95	115	155	149	183	128	53	214	218	285	190	254	170	245	226	118	133	163	121	323	252	195	134	60	26	26	53	41	184	173	262	235	149	173	203	164	117	26	70	18	36	39	22
LOC100579040	55	159	153	107	156	158	130	108	64	134	202	262	232	228	215	228	337	251	275	246	220	190	242	102	226	146	87	80	128	105	187	336	579	447	391	430	349	348	346	69	216	69	76	124	69
LOC100579047	0	0	0	0	1	0	0	0	0	0	0	0	0	0	0	0	0	0	0	1	0	0	0	1	0	0	0	0	0	1	0	0	1	0	0	3	0	0	0	0	0	0	0	0	0
LOC100579049	95	175	252	235	326	281	318	278	117	220	298	331	442	358	435	464	418	360	466	375	325	281	335	223	360	200	125	128	169	183	544	455	1037	634	569	691	597	623	308	121	256	136	234	256	140
LOC100579052	3	16	6	12	15	9	24	15	9	9	16	23	26	29	19	20	20	14	17	28	15	22	15	14	13	13	9	2	17	10	11	25	34	16	16	34	24	15	17	5	11	14	10	8	8
LOC100579053	60	143	169	167	228	357	191	95	70	202	170	304	328	252	174	209	427	333	342	494	272	252	251	145	306	140	98	168	202	171	293	404	711	564	539	571	471	440	281	91	372	92	155	149	99
LOC100579054	48	196	125	72	225	74	97	95	38	139	138	245	145	130	146	154	118	61	79	63	56	185	132	94	61	62	24	23	47	19	112	94	169	123	124	189	103	133	121	17	65	17	14	39	18
LOC100579055	6	12	12	14	18	16	19	6	5	23	15	12	16	19	11	16	21	10	11	15	17	21	10	15	14	5	2	5	8	7	27	8	46	22	21	32	16	29	5	3	12	1	3	7	1
LOC100579057	55	133	103	54	168	58	170	107	47	107	73	135	128	150	142	183	116	94	93	101	89	176	90	85	95	72	28	26	44	43	237	152	229	165	137	217	168	192	91	26	54	34	30	43	23
LOC100579058	5	2	4	3	7	9	3	5	1	8	5	9	8	12	8	15	6	3	8	5	3	2	13	5	11	5	2	1	3	1	12	12	13	10	16	17	9	19	2	2	4	2	3	3	3
LOC100579061	86	188	153	149	298	225	350	253	130	186	214	345	404	367	374	434	383	317	380	327	229	285	261	125	372	230	109	112	238	124	658	415	774	590	536	698	550	780	286	102	242	142	151	206	102
LOC100642173	4	7	7	6	15	6	6	2	1	3	7	3	4	5	2	3	5	7	10	6	4	2	10	5	3	0	0	2	4	3	0	7	19	6	1	10	6	8	3	5	4	3	3	3	1
LOC100820634	27	36	122	61	122	73	77	26	37	82	130	65	210	135	52	58	233	212	162	225	224	102	106	40	141	42	45	26	81	67	76	196	445	297	201	238	137	107	148	43	74	50	69	65	57
LOC100859932	15	12	45	21	40	25	36	22	35	28	48	16	84	58	19	16	77	78	69	110	103	31	42	18	75	23	33	7	10	34	52	90	236	82	104	134	86	47	53	20	15	19	51	45	32
LOC101664701	92	176	209	209	321	197	197	85	69	234	293	188	347	165	232	207	298	252	169	176	211	325	181	160	131	78	35	38	71	64	163	188	475	279	158	379	301	162	182	27	90	17	33	62	51
LOC102653572	1	0	1	0	8	5	11	2	0	0	1	5	3	17	1	4	0	4	0	5	3	15	16	3	1	1	1	0	0	11	8	28	41	35	3	5	0	6	3	0	4	0	5	3	0
LOC102653577	0	0	0	0	0	0	0	0	0	0	0	0	2	1	0	0	0	0	0	0	0	0	0	0	0	0	0	0	0	0	0	0	0	0	1	0	0	0	1	0	0	0	0	0	0
LOC102653587	1	3	8	3	4	3	1	2	3	3	7	10	8	12	11	7	5	2	8	8	4	10	10	3	9	2	0	0	0	1	10	5	40	10	4	8	11	4	2	2	4	0	1	1	0
LOC102653588	13	46	38	22	43	52	47	35	24	46	73	67	81	67	36	46	85	80	75	92	69	68	61	24	103	39	26	30	42	49	80	74	200	153	126	183	118	103	95	23	60	26	36	43	24
LOC102653596	0	0	0	0	0	1	0	0	0	0	0	1	1	0	0	0	0	0	1	0	0	0	0	1	1	0	1	0	0	0	1	0	0	0	0	0	0	0	0	3	0	1	0	0	0
LOC102653601	16	78	58	46	92	76	105	44	21	82	87	80	107	97	83	81	123	111	96	105	78	102	97	45	120	36	39	36	57	54	58	115	213	222	133	191	147	121	122	38	71	42	66	58	44
LOC102653609	1430	890	1837	2443	1625	3997	6120	1295	3248	2947	5311	1791	2874	2919	1505	3001	8387	5286	4616	7123	4178	6121	3798	2572	6063	3326	1008	2594	3532	3438	9921	4159	9498	3620	3622	3587	5132	4948	3573	2041	2841	2256	3609	1359	2082
LOC102653614	29	36	33	38	54	58	60	35	23	38	63	47	62	60	43	37	43	38	44	43	34	77	58	53	48	26	38	28	42	15	51	56	110	63	48	56	68	76	37	32	52	33	76	27	21
LOC102653615	0	0	0	0	0	0	0	0	0	0	0	0	0	0	0	0	0	0	0	0	0	0	0	0	0	1	0	0	0	0	0	0	0	0	0	0	0	0	0	0	0	0	1	0	0
LOC102653636	1	1	0	1	1	0	0	0	0	1	0	2	0	0	4	3	0	0	0	0	0	2	0	0	2	0	0	0	0	0	0	0	0	0	1	1	0	4	2	0	0	0	0	0	0
LOC102653637	1	2	1	3	2	1	1	0	1	1	2	0	3	0	0	1	3	2	0	3	0	3	2	0	3	0	0	0	0	2	1	2	4	2	2	6	1	0	1	0	3	2	0	0	0
LOC102653640	4	14	15	10	16	9	21	11	18	21	24	28	17	40	25	24	34	31	21	22	20	22	35	14	17	14	12	8	15	12	8	34	88	37	20	49	41	12	27	4	6	8	10	15	7
LOC102653641	10	51	54	57	71	53	55	56	39	63	52	100	174	76	90	105	93	96	66	94	52	94	67	58	68	51	23	31	47	24	72	120	168	108	126	171	100	122	76	31	73	33	57	34	24
LOC102653652	0	1	0	0	1	0	0	0	1	1	0	1	0	0	0	1	1	0	0	0	0	0	0	0	4	1	0	0	0	0	1	0	1	0	1	1	1	1	0	0	0	0	0	0	0
LOC102653654	0	2	3	0	1	1	3	1	3	0	0	0	2	0	1	0	0	3	0	0	0	1	1	2	1	0	0	0	0	0	0	1	3	0	1	0	1	2	0	0	0	0	0	1	1
LOC102653655	53	120	360	229	249	164	167	71	88	288	320	311	435	449	298	189	363	798	755	1459	659	280	281	161	334	118	283	133	220	387	42	716	1217	635	1209	1008	583	62	739	245	200	359	482	338	252
LOC102653658	24	69	79	73	127	93	119	40	18	67	121	63	138	100	103	108	130	88	148	150	142	60	80	61	87	89	30	76	129	49	98	115	350	211	115	133	124	83	88	48	120	96	101	96	70
LOC102653663	2	2	1	5	5	2	2	2	0	0	1	5	5	2	5	3	3	0	4	1	2	5	3	0	5	0	0	1	2	0	3	1	3	2	4	11	7	5	2	0	2	2	0	3	0
LOC102653673	3	6	5	3	1	4	3	1	3	1	6	2	9	10	3	4	8	10	3	13	15	18	3	2	11	0	8	4	7	2	3	8	21	11	17	7	9	14	9	10	11	9	31	5	6
LOC102653680	0	0	0	0	0	3	0	0	0	0	0	0	1	1	0	0	1	0	2	3	1	2	0	0	1	0	0	0	0	0	0	2	6	4	0	2	1	0	2	0	0	1	0	1	0
LOC102653687	0	0	0	0	0	0	0	0	0	0	0	0	0	0	0	0	0	0	0	0	0	0	0	0	0	0	0	0	0	0	0	0	0	0	0	0	0	0	0	0	0	0	1	0	0
LOC102653693	0	0	0	0	0	2	0	1	0	0	1	3	1	4	1	0	3	0	4	3	0	2	0	0	0	0	0	0	0	0	1	7	2	1	0	1	1	2	0	0	0	0	0	0	0
LOC102653695	0	0	0	0	0	0	0	0	0	0	0	0	0	0	0	0	0	0	0	0	0	0	0	0	0	0	0	0	0	0	0	0	0	0	0	0	0	0	0	0	0	0	0	0	0
LOC102653702	58	133	83	81	108	90	92	98	75	129	145	183	112	126	106	102	122	113	121	108	101	146	131	115	92	58	21	28	38	37	139	94	216	174	138	169	143	153	96	17	78	37	22	46	30
LOC102653703	0	0	1	0	1	1	0	3	0	4	2	0	3	0	1	2	5	1	1	5	0	0	4	0	0	1	0	0	2	1	0	2	0	4	2	7	3	3	0	0	1	1	0	0	0
LOC102653709	1	0	1	0	1	0	0	0	0	0	0	0	2	1	0	0	0	0	0	3	1	0	0	0	0	0	1	0	0	0	0	0	0	1	2	1	0	0	1	2	0	3	1	1	1
LOC102653716	1	0	0	0	0	0	1	0	0	0	0	0	3	0	0	0	2	0	0	0	0	2	0	0	0	1	0	0	0	0	1	0	0	0	0	0	0	0	0	0	0	1	1	0	0
LOC102653718	0	0	0	0	0	0	0	0	0	0	0	1	0	1	3	2	0	0	0	0	0	1	0	0	0	0	0	0	0	0	2	0	0	0	0	0	0	0	0	0	1	0	0	0	0
LOC102653727	0	3	1	0	4	2	2	2	0	1	0	2	4	1	2	3	2	1	0	3	1	2	2	0	5	0	1	1	2	2	7	4	4	10	2	7	2	2	3	0	5	1	2	2	3
LOC102653738	0	1	0	0	0	0	1	0	0	0	0	1	0	0	0	0	0	0	0	0	0	0	0	0	0	0	0	0	0	0	0	0	2	1	0	0	0	0	0	0	0	0	0	0	0
LOC102653748	6	18	28	22	11	10	24	7	16	18	23	35	22	32	27	19	33	32	26	26	38	31	15	14	21	10	6	6	13	13	17	37	63	59	23	55	40	16	35	3	4	4	2	8	9
LOC102653753	22	75	60	39	108	45	94	52	26	61	80	116	119	95	128	111	92	93	88	80	61	86	85	35	98	48	32	40	52	62	84	88	202	148	132	212	127	115	78	21	81	28	40	45	29
LOC102653759	45	134	131	126	188	173	201	150	88	119	174	204	270	255	257	278	228	180	241	211	175	187	208	138	183	107	65	68	110	92	271	234	401	326	293	353	327	279	217	50	168	56	81	126	57
LOC102653763	4	5	11	13	13	9	14	17	5	7	13	21	25	8	10	9	20	10	15	25	9	14	12	5	8	10	6	2	12	13	25	23	39	26	21	23	22	22	7	6	11	9	16	17	7
LOC102653764	202	189	198	158	341	327	168	153	151	142	204	224	249	212	169	238	326	198	230	229	134	157	159	134	239	188	89	115	139	152	348	120	458	379	347	360	217	394	102	89	248	149	181	196	111
LOC102653771	2	5	3	3	4	2	1	3	2	4	4	3	2	3	1	5	4	8	1	5	4	5	5	1	3	1	2	3	1	1	4	4	12	4	6	9	9	5	0	1	2	3	2	3	2
LOC102653773	27	234	126	86	189	108	152	86	55	96	155	245	199	153	135	178	154	128	116	118	96	202	162	64	121	76	33	49	58	39	192	129	274	191	135	189	135	180	137	21	62	31	48	45	42
LOC102653778	0	0	0	0	0	0	0	0	0	0	0	0	0	0	0	0	0	0	0	0	0	0	0	0	0	0	0	0	0	0	0	0	0	0	0	0	0	0	0	0	0	0	0	0	0
LOC102653780	0	3	2	2	2	0	3	3	0	2	1	4	7	5	1	1	10	6	7	1	5	2	3	3	1	2	2	7	2	1	1	5	6	3	10	4	4	9	6	3	0	4	2	3	4
LOC102653782	3	0	2	3	2	3	4	3	2	0	0	0	0	3	1	2	5	1	0	0	1	4	0	1	1	0	1	0	1	1	5	2	2	1	0	5	2	4	0	0	7	0	1	3	1
LOC102653784	0	5	9	7	8	6	6	2	1	4	6	11	15	10	3	4	11	4	7	8	6	8	6	10	3	8	6	3	2	4	5	8	18	9	12	11	10	11	5	1	7	8	1	5	0
LOC102653793	107	242	217	223	358	217	223	126	121	186	264	388	336	286	285	303	309	253	273	262	263	355	304	153	232	147	95	83	124	140	231	370	777	508	374	607	334	367	253	70	164	51	72	125	87
LOC102653795	4	22	13	24	18	18	11	9	6	11	18	25	21	18	33	22	17	21	23	20	14	18	18	14	26	10	4	3	15	3	17	20	36	21	27	41	20	21	14	9	13	12	14	10	3
LOC102653797	1	2	3	1	6	7	4	0	3	8	11	3	3	0	0	0	5	5	5	2	3	5	4	1	8	2	7	2	3	4	1	5	3	3	4	4	0	15	1	4	12	10	11	10	9
LOC102653798	5	13	7	12	16	9	8	15	6	6	11	16	13	25	14	16	17	18	15	15	9	14	14	2	20	8	4	3	13	11	30	25	33	19	27	26	23	32	19	5	19	13	7	10	3
LOC102653800	566	697	1445	1081	1422	1243	1417	545	920	987	1753	849	1386	1545	1403	1188	1316	1383	1649	1267	1576	960	973	904	1087	576	509	494	753	674	802	1128	2173	1880	1523	1797	1450	1281	883	255	737	304	405	905	607
LOC102653803	0	3	5	2	2	2	1	1	0	0	5	3	3	1	3	3	6	5	0	0	0	11	2	1	5	1	4	1	0	2	2	3	6	7	2	7	4	1	1	2	6	1	7	2	0
LOC102653810	1	2	1	2	3	0	2	6	0	0	2	1	0	2	0	0	0	0	2	1	0	5	0	0	1	0	0	0	0	0	3	2	6	1	2	3	0	0	2	0	1	0	1	0	0
LOC102653814	1	5	3	0	1	0	0	0	0	0	2	1	0	0	0	0	2	1	0	0	0	2	48	0	0	0	0	0	0	0	1	0	0	0	0	1	2	1	3	0	0	0	1	0	0
LOC102653815	125	363	244	228	350	219	260	247	169	306	389	701	387	400	355	437	475	340	396	383	259	470	355	261	339	272	94	100	194	148	513	359	758	739	493	512	532	695	414	87	401	128	124	191	122
LOC102653824	32	122	66	81	102	55	80	45	36	93	123	140	116	132	89	100	134	84	120	97	75	126	101	100	119	59	31	22	57	36	130	110	231	216	126	150	136	170	84	39	89	52	51	61	38
LOC102653832	3	4	15	4	12	9	16	9	5	24	26	5	13	22	29	11	79	22	19	6	15	18	57	14	21	15	6	13	8	5	4	23	13	44	12	33	31	21	19	14	12	13	10	10	14
LOC102653835	0	0	0	0	0	0	0	0	0	0	0	0	0	0	0	0	0	0	0	0	0	0	0	0	0	0	0	0	0	0	0	0	0	0	0	0	0	0	0	0	0	0	0	0	0
LOC102653839	127	272	207	198	307	266	233	131	226	186	255	338	282	287	216	252	335	260	298	276	222	287	208	181	260	134	88	81	117	93	343	305	697	528	390	445	357	515	280	66	175	71	108	157	105
LOC102653840	0	4	1	0	0	1	1	1	0	1	0	0	0	2	0	0	0	1	1	2	0	1	0	2	0	2	0	0	0	0	3	2	5	1	1	1	3	0	4	1	1	3	1	1	0
LOC102653843	0	1	0	0	0	0	0	0	0	0	0	0	0	0	0	0	1	1	0	2	0	2	1	0	0	0	0	0	0	0	0	0	1	0	0	0	0	0	0	0	0	0	0	2	0
LOC102653856	23	90	38	48	56	46	35	34	21	43	48	90	57	56	82	85	34	28	25	18	14	51	54	60	23	27	11	20	18	9	31	45	77	14	32	72	38	29	16	6	27	5	6	21	3
LOC102653857	0	3	7	4	4	5	4	3	0	12	7	3	6	8	4	5	5	6	8	11	7	1	4	3	8	4	8	5	6	2	5	8	17	14	16	20	9	8	5	4	17	48	37	4	1
LOC102653858	1	0	0	4	1	0	1	0	1	0	0	2	3	1	0	0	2	23	1	13	4	3	0	0	19	0	1	0	2	1	1	3	4	5	10	31	11	0	1	0	0	0	3	2	1
LOC102653862	465	1121	703	1031	1416	928	1855	1212	949	1429	1411	1747	3291	2411	1575	2587	1725	1477	1870	1446	2204	2627	1585	1193	1006	508	346	415	524	387	2890	1670	3225	1727	1934	1998	2627	1867	1383	229	624	443	528	398	268
LOC102653865	0	0	0	0	1	0	0	0	0	0	0	0	0	0	0	0	0	0	0	0	1	0	1	0	0	0	0	0	0	0	0	0	1	0	1	1	0	0	0	0	1	0	0	0	0
LOC102653873	2	0	1	0	1	6	0	1	0	0	3	1	4	2	4	4	0	0	2	2	1	3	3	0	2	4	2	0	1	1	5	2	5	0	1	7	7	2	3	0	1	1	1	1	0
LOC102653879	172	763	592	626	852	743	538	276	260	711	808	957	936	771	726	716	999	742	842	917	638	933	787	561	939	497	344	340	578	413	417	796	1868	1393	1358	1135	948	884	707	306	863	406	537	560	345
LOC102653881	2	1	0	1	0	0	0	0	0	0	1	0	1	1	1	1	0	1	1	0	0	1	0	2	1	2	0	0	0	2	1	0	2	0	2	1	0	1	1	0	0	0	0	0	0
LOC102653888	0	0	0	1	4	0	0	0	0	0	1	0	0	0	1	1	0	3	1	0	0	0	0	1	2	0	1	1	3	0	1	2	5	1	1	0	5	2	0	2	0	2	3	2	0
LOC102653890	0	0	1	0	0	1	1	1	1	0	0	0	0	2	0	0	1	1	0	5	0	0	2	0	1	0	2	0	1	1	2	1	3	1	2	2	1	2	0	0	0	4	1	1	0
LOC102653893	12	38	49	23	47	40	27	15	18	20	37	47	58	40	30	39	63	36	45	35	44	55	33	31	39	29	17	18	30	15	31	37	98	103	51	65	49	67	57	21	37	34	61	23	17
LOC102653894	283	649	654	775	679	825	900	476	472	490	1069	608	841	617	650	665	767	517	1192	1029	703	635	576	497	722	488	511	575	1065	331	607	659	1693	931	589	1095	916	696	593	761	1209	1496	1955	655	542
LOC102653897	0	2	0	0	2	0	3	0	0	1	0	1	0	1	2	2	0	0	0	1	0	0	0	0	3	0	2	0	0	0	1	0	1	1	0	2	0	0	0	1	1	0	0	1	0
LOC102653899	12	768	114	104	52	19	159	352	6	80	11	162	94	342	11	109	57	83	7	12	116	131	429	148	1	19	5	8	30	1	6	441	375	63	301	439	343	106	1363	14	18	13	29	11	4
LOC102653910	0	0	0	0	0	0	0	0	0	2	0	0	1	0	0	0	0	0	0	1	0	0	1	0	0	0	0	0	0	0	0	0	0	0	0	0	0	0	0	0	0	0	0	0	0
LOC102653920	9	10	21	13	4	4	13	1	4	9	15	13	14	11	7	6	23	26	25	18	19	8	15	10	24	2	6	3	4	6	14	22	27	18	17	23	20	29	19	3	13	5	12	12	4
LOC102653922	111	261	297	348	208	248	222	71	224	329	316	492	433	349	190	179	336	318	205	269	351	199	256	122	145	44	25	36	60	56	186	325	844	529	235	531	374	186	261	48	40	37	51	73	70
LOC102653928	0	1	0	4	1	0	0	0	0	1	5	1	0	1	2	3	1	2	3	3	1	3	3	2	0	2	0	0	0	3	1	1	2	3	1	3	4	1	2	1	1	0	0	0	0
LOC102653930	46	111	76	86	84	72	61	36	35	69	138	116	90	137	94	93	82	118	69	88	101	134	97	71	74	31	44	20	38	48	64	102	193	143	108	133	94	65	98	26	49	35	41	53	42
LOC102653932	0	0	0	0	0	0	0	0	0	0	0	0	1	0	0	0	0	0	0	0	0	1	0	0	0	0	0	1	0	0	0	0	1	1	0	0	1	0	0	0	0	0	0	0	0
LOC102653935	225	1078	92	437	772	269	61	68	35	253	207	985	1486	279	159	352	428	222	109	119	160	360	1286	582	512	107	51	23	34	165	314	294	1526	1014	989	155	462	1343	609	14	102	24	13	64	94
LOC102653936	0	0	1	0	1	0	0	0	1	0	1	2	0	0	0	0	0	1	1	1	1	2	1	0	0	0	0	0	0	0	1	3	3	0	0	0	1	0	3	0	0	0	0	0	0
LOC102653938	2	4	2	0	5	1	6	4	1	1	3	6	2	2	3	6	4	2	0	0	1	3	4	5	2	0	3	1	0	3	1	3	7	4	2	11	2	5	2	4	1	2	4	3	2
LOC102653940	41	24	91	88	76	58	57	10	45	66	146	103	118	81	60	49	127	184	111	113	155	99	80	58	131	28	41	46	63	70	35	94	194	178	137	180	98	42	108	53	65	30	51	88	61
LOC102653947	8	3	9	10	7	5	9	9	4	1	1	7	4	15	15	17	14	10	8	10	9	9	10	7	18	17	8	4	4	11	20	16	41	57	23	20	21	55	14	1	3	1	1	9	4
LOC102653951	3	13	12	18	17	21	14	6	18	21	22	11	21	19	15	9	17	28	21	47	36	28	35	12	36	6	12	11	14	28	23	27	54	55	58	42	10	26	28	10	24	11	14	28	20
LOC102653952	8	34	15	16	25	15	33	19	7	23	19	36	17	24	21	22	10	15	15	11	9	38	23	16	16	9	2	5	6	2	12	24	27	21	16	32	28	22	16	0	19	2	7	10	1
LOC102653954	2	12	10	8	10	16	14	15	3	5	8	4	16	8	17	15	10	7	17	20	15	18	11	10	3	11	8	2	10	6	23	10	38	11	20	13	14	12	13	5	14	11	14	9	9
LOC102653955	37	104	54	61	101	52	93	69	25	74	88	125	97	91	88	110	68	58	74	79	41	103	75	71	62	41	16	24	40	14	113	85	151	113	98	129	104	124	73	15	62	16	32	29	25
LOC102653956	41	183	107	103	147	126	118	61	38	132	147	190	248	185	142	184	138	172	158	145	149	301	145	140	133	86	50	70	111	58	79	164	272	223	208	195	177	89	159	44	104	130	97	99	41
LOC102653957	5	8	20	12	12	11	11	7	12	16	19	24	23	18	16	15	31	17	26	41	30	19	17	7	21	10	11	11	34	13	12	33	61	45	46	26	15	19	17	11	19	23	11	17	16
LOC102653958	2	7	4	7	8	7	9	6	3	7	4	14	12	12	8	7	1	9	14	16	4	10	3	2	9	3	0	3	1	5	9	18	23	15	14	19	13	14	14	0	5	2	4	4	4
LOC102653960	81	245	87	144	204	154	158	165	127	193	218	348	284	259	198	275	162	115	105	82	91	342	236	197	84	65	25	39	37	30	240	175	193	155	145	182	223	220	121	24	82	29	24	58	22
LOC102653961	2	6	6	10	17	4	6	9	4	8	10	9	16	4	13	10	24	13	9	17	4	13	9	2	11	5	2	4	4	4	18	9	29	9	17	26	8	21	9	4	9	5	2	9	5
LOC102653965	127	312	258	269	323	317	414	264	88	221	320	401	527	446	380	435	399	359	453	372	306	296	288	227	360	252	121	141	213	164	608	449	965	611	598	626	559	738	310	108	269	183	223	176	148
LOC102653966	5	3	13	13	7	8	2	1	1	8	18	3	13	7	0	2	9	35	14	30	27	7	10	1	16	1	4	2	5	9	7	16	32	22	13	39	11	7	11	2	4	7	2	5	4
LOC102653967	1	1	1	1	6	0	1	0	2	3	2	0	1	2	3	0	1	2	2	1	1	3	3	2	0	2	0	1	1	1	6	2	7	3	0	0	3	3	0	0	0	0	0	0	0
LOC102653979	0	0	2	0	0	0	0	1	0	0	0	0	0	1	1	3	1	0	0	0	0	0	0	0	0	0	1	0	0	0	1	0	2	0	0	0	0	0	1	0	1	0	0	0	0
LOC102653988	0	2	1	1	6	0	0	0	0	1	0	0	1	0	0	1	0	0	3	2	0	1	1	0	1	1	0	0	4	0	1	2	4	2	1	2	3	1	0	0	1	4	2	0	0
LOC102653993	1	1	4	1	6	1	0	0	1	3	2	0	0	3	0	1	2	2	3	2	2	2	3	1	1	0	0	1	1	1	1	3	7	3	2	7	2	0	5	0	1	1	1	0	0
LOC102653994	0	1	0	0	1	1	1	1	1	1	0	1	0	0	1	0	0	0	3	2	0	1	3	0	0	1	1	0	0	0	0	0	1	0	2	2	0	0	1	4	0	0	1	2	0
LOC102654001	0	0	1	0	0	0	0	0	0	0	0	1	0	0	0	0	0	0	0	0	0	0	0	0	0	0	0	0	0	0	0	0	0	0	0	0	0	0	0	0	0	0	0	0	0
LOC102654007	29	110	51	56	99	78	110	53	18	67	94	130	114	127	76	108	43	46	52	41	34	131	80	86	44	41	18	25	41	18	89	68	146	102	58	81	61	46	50	21	39	40	45	22	13
LOC102654008	0	0	0	0	0	0	0	0	0	0	0	0	0	0	0	0	0	0	0	0	0	0	0	0	0	0	0	0	0	0	0	0	0	0	0	0	0	0	0	0	0	0	0	0	0
LOC102654012	35	141	47	103	169	123	108	86	11	112	126	210	174	152	140	137	116	59	89	91	38	189	156	147	89	65	30	22	55	31	117	78	155	137	113	109	116	154	91	16	116	41	43	51	22
LOC102654014	95	130	99	121	109	142	137	116	75	99	121	163	203	161	124	189	189	177	186	117	154	135	128	106	126	106	52	53	87	59	285	179	387	256	199	239	303	418	158	33	105	57	56	73	50
LOC102654025	0	0	0	1	0	0	1	0	0	1	1	0	0	1	1	1	0	0	0	0	0	0	1	0	0	0	0	1	0	0	0	0	1	0	1	1	1	0	1	0	0	0	0	0	0
LOC102654029	611	2166	1167	1605	2102	1728	2196	1211	942	2881	2368	3520	5072	3411	2273	3202	3821	2586	2221	2528	2534	5671	3471	2159	1483	832	367	606	818	523	1994	2561	4110	3335	2945	2561	3283	2542	2650	401	1326	513	807	582	370
LOC102654041	0	0	0	0	2	1	1	0	0	2	0	1	0	1	0	0	1	0	0	2	3	0	0	0	1	0	0	0	0	0	1	4	0	0	3	2	2	1	4	0	0	0	1	2	0
LOC102654047	0	0	0	0	1	1	1	0	0	0	0	0	0	0	0	0	0	0	0	2	0	1	0	0	0	0	0	0	0	1	1	1	0	1	2	3	0	0	0	1	0	0	0	0	0
LOC102654049	0	0	0	0	3	0	0	0	0	0	0	0	0	0	0	0	0	0	0	0	0	1	0	0	0	0	0	0	1	1	0	0	1	1	0	0	0	1	0	0	0	0	0	0	3
LOC102654053	0	0	0	0	1	0	0	0	0	0	0	0	0	0	0	0	0	0	0	0	0	0	0	0	0	0	2	0	0	0	0	0	0	0	0	0	0	0	0	0	0	0	0	0	0
LOC102654066	3	6	3	3	7	12	6	4	2	2	7	8	13	7	7	0	7	2	8	8	5	10	1	3	11	4	6	3	5	7	6	7	24	13	7	22	9	6	3	4	3	4	4	3	1
LOC102654069	9	26	28	24	27	29	36	18	11	29	27	33	60	51	48	47	29	23	49	72	44	31	24	34	48	53	32	50	79	35	17	41	89	49	72	51	38	21	37	52	83	86	61	67	30
LOC102654074	0	0	0	0	0	0	1	0	0	0	0	0	0	0	1	1	0	0	0	0	0	1	1	0	0	0	0	0	0	0	0	0	0	3	0	0	0	1	0	0	0	0	0	2	0
LOC102654078	0	1	0	0	0	0	0	1	0	1	0	2	2	1	0	0	1	1	0	0	0	0	0	0	0	0	0	0	1	0	0	0	0	0	0	0	0	0	1	1	0	0	1	0	0
LOC102654083	60	88	163	164	127	179	123	52	59	141	240	226	259	275	188	162	417	463	295	387	431	196	216	66	361	144	173	141	164	194	92	368	675	594	484	583	358	163	318	132	182	145	164	217	136
LOC102654084	17	28	38	37	63	52	31	11	27	54	60	30	49	59	39	34	71	67	41	42	63	36	39	18	34	13	16	8	26	20	15	44	124	79	52	90	58	18	46	13	27	9	19	21	15
LOC102654086	0	0	0	1	1	0	0	0	7	1	2	3	0	0	1	1	1	0	0	13	0	0	5	4	1	2	1	3	1	0	5	1	0	1	1	2	0	1	0	4	6	4	2	4	2
LOC102654090	35	128	104	60	88	78	143	90	77	149	180	172	112	167	194	191	79	90	146	86	111	242	151	106	99	58	22	23	49	42	186	215	233	128	101	192	193	99	114	20	65	16	31	40	18
LOC102654091	6	13	2	6	6	6	5	6	3	4	5	8	19	12	5	7	6	7	5	11	3	9	14	6	4	3	0	3	4	7	5	7	21	26	20	23	7	9	9	3	8	1	10	10	3
LOC102654099	0	0	0	0	0	0	0	0	0	0	0	0	0	0	0	0	0	0	0	0	0	0	0	0	0	0	0	0	0	0	0	0	1	0	0	0	0	0	0	0	0	0	0	0	0
LOC102654108	73	175	83	142	246	145	299	258	33	180	157	322	399	401	317	396	114	97	151	95	108	373	238	244	99	44	21	23	27	34	386	161	323	177	148	194	233	280	119	13	52	27	18	50	23
LOC102654111	55	69	83	74	94	57	115	37	67	78	115	78	102	103	68	72	146	127	83	111	134	112	83	53	73	27	22	20	30	46	98	121	264	164	94	186	132	59	106	21	43	29	34	42	28
LOC102654114	0	0	1	1	3	0	0	2	1	2	1	0	4	3	1	2	5	9	3	2	2	1	1	0	6	1	3	0	2	1	2	0	5	2	7	5	2	5	2	0	4	3	0	2	2
LOC102654121	65	204	168	181	198	189	191	118	35	196	217	254	275	224	232	252	281	218	196	218	221	248	216	205	208	149	70	74	113	117	169	280	458	388	307	377	282	302	244	52	196	51	54	120	67
LOC102654122	7	1	7	5	9	3	10	9	8	4	5	15	5	14	7	12	16	8	4	6	6	13	13	3	3	3	2	1	5	3	10	7	22	14	9	22	10	6	4	1	3	1	3	2	3
LOC102654127	224	707	703	714	724	688	757	541	317	569	789	1116	1060	1070	1221	1063	1163	1073	898	1096	931	764	921	610	649	372	219	301	406	341	606	1385	2348	1273	1241	2082	1416	955	1100	189	479	289	324	431	218
LOC102654146	429	830	1123	899	1033	209	863	555	400	1905	3000	1163	1704	1409	1597	1168	1435	1521	2177	1721	1606	1736	1518	1360	782	490	324	118	332	479	846	2105	1295	1623	1648	1851	1858	640	1119	337	469	436	443	191	732
LOC102654158	0	0	0	0	0	0	0	0	0	0	0	0	0	0	0	0	0	0	2	0	0	0	0	0	0	1	0	0	0	1	0	0	0	0	2	0	0	2	0	0	0	0	0	0	0
LOC102654159	93	297	158	271	398	272	444	221	87	327	281	445	649	555	337	563	310	319	278	331	323	716	450	252	209	96	67	95	103	61	424	325	574	293	397	507	532	371	225	52	149	58	47	79	58
LOC102654160	3	3	7	2	4	7	1	1	0	7	4	3	3	2	5	3	10	15	3	8	14	10	7	4	6	4	3	4	1	7	4	3	10	16	10	8	6	4	0	2	3	10	15	12	2
LOC102654161	0	0	2	3	4	2	1	0	0	2	0	4	6	3	4	0	0	3	4	4	1	5	5	0	6	2	3	0	8	1	1	7	11	10	5	7	3	3	1	0	3	3	6	0	3
LOC102654165	173	149	722	412	314	152	143	35	201	270	644	215	463	377	261	176	384	834	386	688	716	345	302	84	638	70	139	163	184	219	66	651	1282	816	1028	1094	433	114	619	111	116	100	115	250	196
LOC102654166	255	138	396	353	314	373	391	84	363	332	563	259	816	724	456	368	1734	2430	771	1896	2702	1350	994	359	1378	571	1164	752	841	1309	327	1382	2291	2451	1888	974	1205	425	1442	1340	485	466	847	1105	1533
LOC102654169	429	1809	995	1706	1229	1209	2431	2080	622	1575	2209	1674	3064	3595	1975	2467	1491	1502	1792	1410	3016	2219	1588	2007	946	747	286	502	691	301	1893	2548	2573	1712	1875	2463	3068	1538	2312	213	759	697	746	402	225
LOC102654173	32	43	72	48	85	29	41	24	33	87	128	61	107	58	10	33	123	88	64	67	69	134	68	37	40	9	4	1	32	32	57	71	183	116	67	117	62	94	57	8	40	13	13	20	10
LOC102654175	3	4	7	3	2	7	5	7	4	8	8	7	2	6	4	5	0	2	2	1	2	8	5	2	7	3	0	1	1	3	9	5	14	3	5	4	4	10	12	1	6	0	3	4	1
LOC102654183	0	0	0	1	0	0	0	0	0	0	0	0	0	0	0	0	0	0	0	0	0	2	1	0	0	0	0	0	0	0	0	0	0	5	1	0	0	0	0	0	0	0	0	0	0
LOC102654184	25	32	59	25	49	50	43	15	27	37	54	39	52	54	34	40	109	86	73	70	54	46	71	21	58	69	31	42	85	20	53	79	104	76	78	54	84	115	61	92	73	162	219	51	36
LOC102654186	31	88	78	95	101	72	77	26	37	127	133	107	84	109	77	68	147	95	76	98	102	154	122	74	104	47	37	49	65	62	47	108	204	126	136	160	123	81	126	59	118	75	90	66	42
LOC102654192	22	94	75	75	136	96	101	67	22	82	66	208	136	140	124	179	105	57	78	60	54	164	113	101	77	46	13	20	64	25	80	113	203	153	84	196	112	126	101	12	44	21	28	42	16
LOC102654206	0	0	0	0	0	0	0	1	0	0	0	0	0	0	0	0	1	2	1	0	0	0	0	0	0	0	0	0	0	0	0	0	0	0	0	0	0	0	0	0	0	0	0	0	0
LOC102654211	1	0	3	3	1	4	1	0	0	0	4	1	20	4	5	4	1	2	20	7	1	5	5	0	5	3	4	0	3	2	1	2	11	2	5	5	5	2	1	1	4	1	3	2	0
LOC102654212	0	5	5	2	8	4	13	7	3	7	3	8	14	9	3	4	7	7	10	7	8	6	5	8	7	4	0	2	2	0	5	5	15	8	6	12	14	7	15	1	1	0	1	1	5
LOC102654216	0	0	0	0	0	1	0	0	0	0	2	0	0	0	0	0	2	0	1	0	0	2	1	0	0	0	0	0	1	0	1	0	0	1	0	0	0	0	0	0	0	0	0	0	0
LOC102654242	1	0	1	0	0	0	0	0	0	0	0	0	0	0	1	0	0	0	0	1	1	0	0	0	0	0	0	0	0	0	0	0	0	0	1	2	0	0	0	0	0	0	0	0	0
LOC102654245	0	0	0	0	1	0	0	0	0	0	0	0	0	0	1	1	1	0	0	0	0	0	1	0	0	0	0	0	0	0	0	0	0	0	0	0	0	0	0	0	0	1	1	3	0
LOC102654246	0	0	0	0	0	0	0	0	0	0	0	0	0	0	0	0	2	0	0	2	0	0	0	0	0	0	0	0	0	0	0	0	0	0	0	0	0	0	0	1	0	0	1	0	0
LOC102654257	66	136	152	197	119	96	214	79	20	342	173	301	392	296	60	120	458	236	142	63	372	258	470	230	142	85	80	31	41	87	165	516	496	610	294	738	640	159	613	44	62	21	31	103	76
LOC102654261	39	55	46	42	69	80	80	76	50	52	68	94	84	83	106	117	91	77	96	75	57	90	74	70	96	58	22	34	51	27	155	119	159	122	97	168	128	171	60	35	55	37	57	49	24
LOC102654268	0	2	0	2	2	0	0	4	0	0	0	4	0	0	1	1	0	0	0	3	5	0	1	0	3	1	2	2	0	0	0	1	4	1	4	4	1	0	0	1	2	2	6	1	3
LOC102654271	2765	1462	2210	2383	2706	2248	2774	1580	2955	1285	1973	1999	4132	2219	2442	2843	3374	2069	4983	2921	2938	2358	2477	2702	3798	3205	1651	1812	3037	1930	4500	2299	7680	8590	3988	3657	3592	6474	2553	1412	2154	1850	2196	3188	1878
LOC102654281	16	25	78	46	36	49	48	25	23	17	72	38	77	56	75	38	79	82	75	91	118	46	44	25	84	49	45	45	59	30	29	107	254	172	138	162	88	76	97	47	44	88	108	82	65
LOC102654282	161	582	302	314	454	311	375	277	197	332	440	561	438	449	451	402	417	303	336	319	313	544	422	332	377	218	146	156	194	197	395	341	714	559	496	576	460	505	399	121	384	137	136	258	165
LOC102654286	1	3	3	2	0	0	2	0	2	0	0	1	6	4	2	2	3	2	6	8	13	2	1	0	5	5	1	0	3	3	6	5	11	8	6	15	11	6	3	2	0	1	1	5	0
LOC102654289	17	23	13	17	36	14	18	20	15	11	32	17	29	18	34	35	69	72	42	37	26	20	22	32	52	19	11	11	26	9	25	31	81	54	64	147	146	31	31	18	25	17	16	20	10
LOC102654309	0	1	0	0	0	0	0	0	0	0	0	0	0	0	0	0	0	1	1	0	1	1	0	1	1	0	0	0	1	0	0	0	4	1	1	0	1	0	0	0	0	2	0	0	0
LOC102654312	18	70	61	77	78	89	82	42	24	67	82	98	100	113	91	92	103	113	105	122	108	77	76	58	111	44	31	30	49	44	92	97	206	185	168	149	154	145	92	24	83	27	34	54	39
LOC102654313	0	0	0	1	0	0	0	0	0	1	0	0	3	0	1	1	0	3	0	0	0	0	0	0	2	0	0	0	0	0	2	0	2	1	0	4	0	0	1	0	0	0	0	2	0
LOC102654315	3	3	7	5	4	2	5	5	3	1	2	8	1	6	2	5	4	1	1	1	3	6	3	2	1	2	3	0	8	1	4	5	10	1	2	5	2	5	1	1	4	4	4	1	1
LOC102654331	0	6	2	3	9	2	3	3	5	1	4	0	1	4	4	1	0	0	1	1	3	2	1	1	1	1	0	1	2	3	6	5	6	2	0	3	3	3	0	0	1	2	2	2	1
LOC102654344	0	0	1	0	0	0	0	0	0	0	0	0	0	0	0	0	2	0	2	0	1	1	0	0	0	1	0	0	0	1	1	0	0	2	0	0	0	0	0	1	0	0	3	1	1
LOC102654345	94	235	170	144	274	121	246	171	108	200	185	327	234	268	243	306	173	124	199	130	171	350	209	173	142	83	58	60	59	76	313	200	341	234	204	310	234	231	161	34	78	38	47	59	38
LOC102654349	20	53	37	54	82	59	83	43	12	49	42	162	133	96	125	99	174	54	128	56	60	94	75	51	96	46	18	27	54	33	129	134	253	171	112	252	180	199	98	23	79	30	28	27	22
LOC102654353	153	363	594	555	502	218	506	133	220	274	444	480	537	728	410	319	391	606	574	560	686	387	638	322	617	202	163	167	297	305	186	661	1618	979	811	863	563	470	512	113	251	113	155	403	236
LOC102654355	0	3	4	0	4	1	4	0	1	4	7	7	5	12	0	3	5	7	2	4	7	8	7	3	6	0	3	0	1	4	3	4	9	7	6	7	3	5	4	0	4	2	1	5	2
LOC102654365	23	85	114	133	160	129	148	73	70	94	128	190	270	304	235	212	164	198	190	235	226	182	165	94	125	62	66	72	84	60	158	287	451	308	259	467	338	188	202	40	99	50	69	105	59
LOC102654366	1	3	3	0	13	3	1	1	4	3	3	0	10	2	0	3	21	15	5	6	1	5	2	3	1	4	1	0	4	4	3	0	32	20	1	7	10	14	1	1	4	4	9	0	5
LOC102654368	31	53	51	77	65	75	47	15	32	21	38	88	109	64	38	31	66	89	58	59	53	74	35	27	47	10	8	36	31	15	26	40	165	109	60	185	130	68	54	8	69	6	12	9	6
LOC102654369	213	158	330	197	435	181	265	88	168	357	465	420	638	282	57	154	649	476	357	437	458	596	445	285	303	89	28	38	241	176	419	525	941	803	381	709	489	410	390	74	272	195	109	111	103
LOC102654371	0	3	1	0	0	0	0	0	1	1	1	0	0	0	1	1	0	1	3	0	2	1	1	0	7	3	0	0	0	3	1	0	4	0	5	0	0	2	0	1	0	1	1	2	4
LOC102654379	14	34	22	19	33	40	26	12	8	33	32	45	50	49	29	22	32	33	27	24	21	23	28	14	20	15	9	18	27	11	40	18	78	42	42	55	45	64	39	23	28	18	26	9	6
LOC102654380	0	2	0	0	0	0	0	3	0	0	1	2	1	0	0	0	0	1	0	0	3	1	0	0	0	0	0	0	0	0	1	1	2	0	0	1	1	1	0	0	0	0	0	0	0
LOC102654384	31	103	65	81	137	66	89	46	31	73	94	150	140	123	138	135	86	93	78	94	68	161	125	61	75	47	26	30	40	31	71	90	251	150	143	183	122	110	80	17	77	22	14	41	29
LOC102654393	2	0	0	2	1	1	0	0	0	0	0	0	1	0	0	1	2	0	1	1	1	0	4	0	1	0	0	0	0	0	0	1	0	2	0	0	0	0	0	0	0	2	0	1	0
LOC102654395	13	8	25	21	26	15	10	5	9	28	24	13	26	14	30	21	43	41	29	54	33	29	34	4	45	10	19	10	23	25	14	48	66	57	62	69	30	8	38	19	19	18	18	34	23
LOC102654398	69	237	137	94	151	115	200	206	73	164	111	275	211	343	224	319	171	85	95	104	87	269	186	175	68	37	34	23	39	43	311	152	237	135	109	178	194	251	117	22	67	27	25	32	23
LOC102654405	10212	10776	11758	9981	7187	7746	11955	7324	9448	4280	14209	9238	11637	17451	13851	14933	11250	12259	14475	8369	7889	17851	20942	23612	41649	18232	8091	9177	16189	15318	20369	8101	34383	74088	40651	18201	17211	69184	9460	2425	22879	4405	9406	16884	13091
LOC102654408	0	0	0	1	1	0	0	1	0	0	0	0	0	0	0	0	0	0	0	0	0	0	0	0	0	0	0	0	0	0	0	1	0	0	0	0	0	0	0	0	0	0	0	0	0
LOC102654426	1239	3542	2407	2749	2203	2756	2916	2602	1251	2070	2980	3755	2819	3790	3062	3530	2905	2323	2120	2006	2961	3046	3053	2857	1807	1235	672	799	1135	838	3229	3020	4985	3605	2980	4404	4462	3392	2577	575	1666	645	821	1045	619
LOC102654427	107	234	166	333	274	190	121	68	83	131	200	223	213	190	158	151	117	187	100	174	179	179	136	136	159	79	50	53	55	41	187	217	489	202	228	371	237	229	153	24	120	27	42	94	52
LOC102654435	0	1	0	0	1	0	0	0	0	0	0	0	2	0	1	2	1	1	0	1	1	1	2	1	2	0	0	0	0	1	0	0	2	0	0	2	0	3	0	0	0	0	3	2	0
LOC102654436	24	59	63	34	32	61	72	24	30	23	101	11	50	74	45	47	70	77	29	65	78	39	29	77	113	207	262	76	35	63	30	85	205	245	54	121	127	42	81	138	21	65	89	121	143
LOC102654448	13	16	45	40	25	22	26	7	33	23	42	6	73	52	42	22	52	93	44	70	99	50	36	19	60	16	28	31	36	31	10	94	164	118	118	126	74	30	39	40	20	34	79	48	42
LOC102654452	1	1	0	0	1	1	2	0	0	1	1	2	1	0	6	3	0	6	2	4	4	6	1	0	0	0	0	0	0	3	1	3	3	8	1	1	1	4	1	1	2	1	0	0	0
LOC102654461	2	9	0	2	6	4	1	5	1	5	1	6	4	12	4	4	4	2	11	5	4	5	3	4	4	2	0	1	0	2	4	3	9	3	6	8	3	2	5	0	2	1	1	4	3
LOC102654465	178	453	264	259	443	263	440	277	290	397	354	620	563	640	491	662	522	404	411	442	369	673	540	288	346	224	96	133	175	136	466	500	953	704	558	668	673	710	401	81	258	68	108	162	118
LOC102654470	1	0	0	0	2	0	3	0	2	1	1	3	1	2	0	2	1	0	3	0	1	1	3	0	0	2	2	1	1	0	1	0	2	1	0	1	7	1	1	0	1	2	4	2	0
LOC102654481	0	1	1	3	1	1	0	0	0	0	0	0	1	1	2	0	1	0	0	0	0	1	2	1	0	2	0	1	0	0	2	2	2	0	3	1	0	1	0	0	0	1	0	0	1
LOC102654482	9	4	8	11	7	14	5	3	4	6	7	8	13	13	9	9	12	12	13	25	19	11	11	1	7	8	6	12	25	5	8	14	28	21	15	16	16	6	21	3	7	17	14	9	10
LOC102654488	211	809	407	640	944	1018	693	351	237	1283	1149	1199	2071	1300	771	984	1722	1316	1082	1047	1128	2002	1260	900	829	500	272	447	355	318	660	748	1743	1504	1405	774	1239	989	1076	210	615	218	289	237	219
LOC102654495	5	22	9	9	13	6	14	5	7	9	24	20	6	26	16	20	19	3	12	21	11	16	11	6	13	7	5	10	12	3	17	15	27	28	23	10	13	28	11	5	17	7	12	6	4
LOC102654496	54	141	78	82	79	52	78	48	46	36	83	121	75	103	117	122	97	72	74	44	46	82	58	98	70	57	23	16	20	33	83	71	238	146	114	135	116	141	58	9	33	8	12	34	16
LOC102654510	21	78	79	65	86	74	60	27	27	59	101	82	112	97	78	73	118	123	141	129	104	78	87	50	121	54	38	40	59	69	74	100	207	178	176	189	143	85	115	39	53	50	64	58	52
LOC102654517	39	75	73	75	84	57	81	46	23	62	75	99	81	111	84	98	76	61	66	81	50	93	82	70	66	43	20	26	31	32	97	79	240	104	77	116	97	134	78	17	43	25	52	34	29
LOC102654520	7	113	15	7	21	30	6	17	3	69	12	31	11	41	40	35	27	22	28	54	36	15	50	28	26	17	8	6	17	20	23	48	58	32	64	71	27	32	59	36	77	40	24	52	12
LOC102654530	6	6	1	4	7	10	12	4	1	7	5	5	5	12	7	5	1	0	4	2	1	5	6	3	1	0	2	0	2	0	7	2	14	2	8	6	6	4	2	2	7	1	1	0	0
LOC102654533	0	1	2	0	0	1	3	0	1	1	4	2	3	0	1	1	5	7	0	7	3	3	2	0	1	1	0	1	0	2	0	1	6	6	4	7	4	2	3	1	4	2	4	1	0
LOC102654534	0	0	0	0	0	0	0	0	0	0	0	0	1	0	0	0	0	0	0	0	0	0	0	0	0	0	0	0	0	0	0	0	0	1	0	1	0	0	0	0	0	0	1	0	0
LOC102654541	2	2	0	0	5	0	3	0	2	1	3	0	1	2	3	0	5	4	4	7	0	7	5	1	3	0	0	3	3	0	4	6	5	8	7	8	2	6	5	0	2	0	3	3	1
LOC102654542	8	6	5	11	10	4	1	2	0	3	7	7	16	5	9	7	16	5	7	5	7	3	9	4	13	4	4	2	7	1	4	10	32	13	6	18	12	21	5	4	6	1	7	1	2
LOC102654555	101	166	135	118	210	201	177	166	108	105	162	273	276	232	210	265	294	138	201	176	142	193	153	140	156	81	56	67	104	92	333	203	409	293	267	341	313	461	142	39	167	69	72	91	49
LOC102654567	94	194	88	118	228	128	145	79	107	174	131	288	227	175	169	188	159	134	146	131	106	266	176	112	143	80	38	40	70	56	157	129	247	218	155	197	171	194	116	41	151	58	85	79	37
LOC102654576	5	2	3	4	10	1	4	2	1	3	0	5	2	4	0	1	5	1	3	3	2	4	5	0	3	2	0	0	2	1	2	3	11	8	6	7	7	3	4	0	0	1	1	0	0
LOC102654579	1	0	1	0	0	0	1	0	0	1	0	2	4	0	1	1	3	0	2	3	0	0	0	0	1	0	0	0	1	2	0	1	3	1	4	2	0	0	0	0	0	0	0	1	1
LOC102654580	3	4	2	3	5	0	3	6	1	1	4	2	3	1	2	6	6	0	3	0	1	1	5	4	1	0	1	3	1	2	1	3	5	3	0	5	2	2	1	1	1	0	0	2	0
LOC102654585	2	9	10	7	1	9	8	3	7	5	4	9	4	15	5	8	5	6	6	7	14	7	7	2	4	6	5	0	2	2	9	7	15	11	10	14	13	11	5	3	5	7	4	3	1
LOC102654592	4	3	5	3	3	7	7	10	2	3	6	4	2	4	6	2	6	1	9	4	8	0	2	0	4	1	1	1	0	0	9	6	16	2	5	22	5	14	7	0	8	1	1	3	0
LOC102654594	30	94	87	102	85	84	79	60	22	49	70	111	117	100	55	67	115	85	92	92	86	80	79	72	91	50	38	35	59	48	78	74	174	157	125	124	128	139	77	31	64	48	53	44	39
LOC102654597	0	0	1	2	1	0	2	0	0	0	1	2	3	0	1	0	0	1	2	3	2	1	0	0	1	3	0	1	0	0	2	2	5	5	3	1	3	3	0	0	1	0	1	2	0
LOC102654608	22	168	112	67	111	96	57	45	17	139	76	193	60	179	82	98	71	66	60	95	50	66	119	89	57	33	13	15	47	20	119	61	368	109	110	91	86	76	69	27	70	35	48	44	33
LOC102654609	0	0	0	0	0	0	0	0	0	2	0	0	0	0	0	0	0	1	0	2	0	0	0	0	0	1	0	0	0	0	0	0	0	0	0	0	1	0	0	0	0	0	0	0	0
LOC102654610	232	794	427	448	845	391	566	414	284	489	554	1052	842	784	892	1084	798	574	721	599	524	891	704	476	643	460	232	247	409	263	1083	843	2110	1547	1121	1170	868	1367	809	157	639	170	217	442	219
LOC102654621	1	1	0	0	0	0	0	0	0	0	0	0	0	0	0	0	0	0	1	0	0	0	0	0	0	0	0	0	0	0	0	0	1	0	0	0	0	0	0	0	0	0	0	0	0
LOC102654626	20	42	81	46	60	59	53	22	19	67	95	74	114	96	54	50	167	168	98	168	143	86	92	31	129	53	36	32	69	64	43	147	279	218	196	218	145	73	127	42	54	64	101	66	59
LOC102654640	49	126	156	156	146	199	196	94	64	107	169	229	308	269	187	181	332	294	279	269	274	221	210	106	298	140	83	82	106	140	242	322	601	422	396	502	425	333	274	74	139	67	116	144	96
LOC102654641	1	9	7	5	1	8	2	6	5	1	4	7	2	7	12	7	4	2	23	6	2	8	0	1	5	7	2	1	6	0	5	8	9	3	5	11	3	7	9	3	10	9	8	4	2
LOC102654652	31	105	61	57	132	38	82	57	32	109	90	158	97	94	124	125	64	53	77	63	40	161	88	67	71	50	16	20	60	46	68	75	242	181	100	118	79	91	60	15	97	32	23	49	31
LOC102654653	114	202	379	413	342	357	260	122	171	304	481	326	568	434	398	293	527	671	440	643	724	480	377	246	429	126	127	157	211	250	155	702	1045	730	638	931	531	223	473	158	163	212	277	254	180
LOC102654660	0	0	1	0	3	0	1	0	0	0	0	0	1	0	0	0	2	3	0	1	0	0	0	0	0	0	0	1	0	0	0	1	1	0	0	7	5	1	2	0	0	1	0	1	0
LOC102654676	4	4	14	8	12	4	10	6	12	7	12	6	9	13	9	8	10	15	7	15	11	3	9	7	14	7	4	5	10	6	18	10	42	25	18	26	22	23	17	6	10	10	9	5	4
LOC102654681	12	28	42	21	38	52	24	16	32	42	55	60	72	65	49	35	84	88	69	72	79	64	61	19	68	22	16	19	35	33	29	71	147	96	106	123	61	50	78	19	37	38	28	39	22
LOC102654682	77	188	104	105	299	151	258	213	28	139	146	271	290	216	236	324	154	118	164	134	88	236	161	137	109	85	35	51	82	42	348	171	293	216	226	288	245	281	144	33	101	29	68	60	32
LOC102654683	1	2	0	1	4	0	0	0	0	0	1	2	0	1	4	2	2	0	5	2	1	1	2	5	1	1	0	2	0	0	2	6	3	6	2	0	0	1	1	0	1	2	0	0	0
LOC102654685	0	2	2	4	0	1	0	0	0	1	2	6	1	2	5	2	1	1	0	1	0	1	1	0	6	2	0	0	0	0	0	5	11	8	3	4	3	6	8	0	0	0	1	0	0
LOC102654691	651	2587	2466	2964	2677	3450	2614	1177	649	2932	4637	3188	4307	3461	2519	2177	4364	3732	3692	3511	3693	3861	3129	2577	3416	1674	1097	1211	1754	1267	1284	3018	6590	5894	4331	4193	3917	2126	2902	1134	2143	1323	1863	1522	1154
LOC102654696	2	1	3	2	0	2	4	5	4	2	1	0	2	4	3	5	3	2	2	2	0	1	6	4	6	2	1	0	0	0	7	3	8	0	1	7	6	3	1	0	2	2	3	4	1
LOC102654708	25	55	79	47	88	72	79	66	33	58	109	130	79	117	77	89	84	81	92	97	70	66	84	51	80	51	31	28	52	53	128	109	185	188	101	160	145	151	85	19	68	17	28	34	21
LOC102654712	0	0	0	3	1	3	2	2	0	0	1	0	0	0	0	2	3	3	3	2	2	1	1	0	1	1	0	1	1	1	0	0	3	3	2	1	2	1	1	2	0	1	3	0	0
LOC102654715	98	199	217	193	344	176	201	149	49	249	309	366	460	271	137	208	561	347	373	337	339	348	341	213	190	50	29	18	113	101	311	452	917	610	379	697	459	403	357	49	157	34	40	63	45
LOC102654726	7	5	17	9	8	4	4	2	7	6	19	12	12	13	2	1	14	15	21	28	31	7	12	4	77	1	13	8	14	19	3	13	28	104	43	24	12	19	5	11	6	1	6	16	16
LOC102654729	0	0	0	1	1	2	1	0	0	0	2	1	1	1	0	0	1	1	0	0	0	1	1	1	0	0	0	0	0	0	2	1	3	1	0	8	1	3	2	1	0	0	0	0	1
LOC102654736	3	10	17	14	10	18	11	6	9	5	19	18	24	18	13	16	27	30	22	21	41	11	26	16	31	19	7	14	24	16	7	35	52	40	39	40	27	10	19	23	16	20	23	13	12
LOC102654737	95	216	157	152	282	201	295	230	101	176	240	337	456	352	299	450	411	340	385	298	294	290	311	183	286	157	76	93	165	97	530	432	874	498	415	464	535	498	283	65	192	85	121	100	63
LOC102654740	0	0	1	0	1	0	1	0	0	1	0	0	0	0	0	0	0	0	1	0	0	0	0	0	0	2	0	0	1	0	0	0	0	0	0	0	0	0	2	0	0	4	0	0	0
LOC102654745	1	6	4	6	3	0	5	0	5	4	6	3	12	4	4	3	8	32	6	10	13	9	3	3	24	1	6	5	11	10	6	3	17	20	43	24	8	3	8	4	9	6	9	14	9
LOC102654746	1	0	3	2	3	1	0	3	1	5	2	4	2	4	6	4	4	2	1	7	5	9	1	2	6	1	0	0	1	1	5	4	8	2	16	9	8	3	4	0	3	2	1	3	1
LOC102654758	0	2	1	1	4	3	1	4	0	0	1	2	2	2	0	0	0	0	2	1	1	0	0	2	0	0	2	1	0	0	7	0	1	3	0	0	0	2	1	0	0	0	1	0	0
LOC102654763	5	8	7	3	5	15	14	13	8	12	13	16	10	13	5	3	9	5	9	5	8	7	11	6	8	6	2	5	4	4	11	7	13	13	11	18	13	3	14	1	12	5	5	3	3
LOC102654766	37	277	125	79	98	99	124	48	19	85	81	167	132	121	90	128	100	71	76	82	67	144	98	82	64	47	21	26	50	39	72	89	224	124	89	117	146	115	331	33	37	39	35	38	31
LOC102654768	26	128	67	76	122	94	130	92	38	120	74	217	175	180	152	191	97	73	72	65	63	205	138	97	67	39	16	19	25	31	154	162	238	107	110	198	179	134	75	15	59	21	19	30	11
LOC102654773	55	73	131	76	104	91	91	45	55	72	149	78	117	124	84	73	168	158	129	150	193	116	79	68	150	79	67	47	65	65	61	156	371	237	194	244	156	119	122	74	50	41	76	81	69
LOC102654776	0	0	4	1	2	5	0	0	0	0	6	2	4	1	0	0	9	18	5	19	7	5	0	0	12	2	2	0	3	4	2	8	20	7	3	14	2	0	1	4	3	3	4	3	3
LOC102654777	37	57	67	153	89	44	42	21	18	89	114	53	182	116	35	42	151	120	129	86	208	136	104	77	124	46	25	34	39	35	52	122	263	172	195	233	134	100	122	23	47	17	18	33	32
LOC102654781	12	118	53	45	32	39	25	18	9	14	25	35	42	29	53	43	12	39	46	40	22	40	18	68	285	225	42	143	143	107	19	23	86	206	139	43	29	344	24	1	142	8	31	39	39
LOC102654782	0	2	0	1	0	1	1	0	5	0	0	0	1	1	4	4	3	0	1	0	2	1	0	1	0	0	0	0	0	0	1	0	0	8	0	0	0	0	0	1	0	2	0	0	0
LOC102654783	2	1	2	1	2	2	2	0	0	2	2	13	1	0	1	0	6	0	1	0	0	2	0	0	0	0	1	1	0	0	0	0	8	0	0	0	1	0	4	0	9	2	1	2	2
LOC102654791	74	156	215	209	233	246	212	142	82	176	256	282	318	299	271	250	451	442	398	390	392	233	284	121	394	185	150	150	207	185	239	439	892	653	613	722	562	342	388	159	243	201	284	247	145
LOC102654795	1	1	4	3	1	2	2	0	1	1	7	1	2	0	3	2	3	5	3	1	4	1	5	0	4	0	2	1	1	7	0	5	7	6	5	3	6	4	2	4	3	3	5	4	2
LOC102654799	0	0	0	0	0	0	0	0	0	0	0	0	0	0	0	0	0	0	0	1	0	0	0	0	0	1	7	7	6	2	2	0	1	0	0	0	1	0	0	2	12	7	19	11	2
LOC102654800	19	44	79	64	102	85	60	30	13	68	98	98	53	93	65	110	98	86	121	82	86	68	26	72	81	47	21	30	22	36	41	114	206	145	132	210	148	65	107	25	52	17	19	18	15
LOC102654804	1	6	4	2	6	3	7	5	2	1	20	4	8	5	8	10	3	6	7	2	6	10	3	3	1	2	4	2	1	2	6	6	6	10	5	5	9	8	1	0	5	0	3	1	3
LOC102654839	2	15	11	35	24	22	52	4	4	21	36	5	97	10	15	17	34	23	27	19	47	23	24	13	32	7	19	7	11	35	22	29	50	15	66	42	37	23	10	4	12	6	2	15	11
LOC102654841	1	0	11	2	1	0	3	2	1	5	15	8	18	5	6	3	9	10	6	9	12	12	18	3	2	3	1	1	2	3	1	15	8	4	15	15	12	2	9	5	8	3	5	4	1
LOC102654858	8	32	35	16	23	34	24	6	9	17	29	30	23	29	23	25	37	42	28	49	42	29	28	14	38	22	13	12	10	16	13	55	85	74	44	66	43	42	41	15	14	13	25	24	16
LOC102654860	0	2	4	1	10	4	0	3	7	2	5	0	3	3	3	2	5	5	7	2	2	0	7	0	4	0	1	2	0	0	0	1	9	5	1	3	2	9	3	2	1	0	1	1	0
LOC102654867	0	7	8	2	2	5	3	1	7	4	7	11	3	8	2	0	9	6	14	7	8	4	5	0	4	0	5	6	2	5	3	6	20	20	8	31	10	0	14	2	0	3	0	0	3
LOC102654871	15	36	38	37	41	50	51	15	33	48	61	63	70	44	35	38	79	61	79	61	75	59	37	31	66	38	32	42	51	39	40	71	128	136	103	110	91	94	63	35	54	27	42	49	26
LOC102654874	0	1	2	1	5	1	3	0	0	2	0	0	1	5	0	0	1	0	1	0	1	1	0	2	0	4	3	2	6	0	1	0	4	3	0	2	0	3	0	1	3	7	4	1	2
LOC102654878	0	0	0	0	0	0	0	0	1	3	0	0	0	0	0	0	0	0	0	1	0	1	0	0	0	0	0	0	3	0	0	1	0	0	0	1	0	0	0	2	0	0	0	0	0
LOC102654889	2	7	15	9	10	18	10	3	4	16	13	11	16	13	7	10	17	24	20	31	22	14	15	4	11	15	6	7	10	13	15	14	32	32	45	52	21	10	15	3	8	13	14	14	8
LOC102654890	98	266	197	127	319	246	238	255	138	205	185	414	325	284	307	385	260	184	236	192	130	271	232	148	246	200	92	89	153	105	402	236	532	328	305	377	350	521	201	81	192	145	146	138	74
LOC102654894	2	8	11	7	9	11	20	9	7	4	7	8	13	13	11	13	13	11	5	12	9	18	18	13	17	14	12	7	9	5	23	20	43	17	17	12	14	8	10	7	9	1	6	6	10
LOC102654897	0	0	0	0	3	0	0	0	0	0	0	0	1	0	0	0	0	0	1	0	0	0	0	1	1	0	0	0	0	0	0	0	2	1	0	0	2	2	3	0	0	0	0	0	0
LOC102654905	2	21	15	8	17	3	8	5	5	11	23	18	20	30	10	9	12	11	11	7	22	22	16	7	4	3	3	1	2	7	9	25	10	11	11	12	26	13	7	0	0	2	2	1	3
LOC102654906	2	7	4	8	6	2	7	1	1	1	1	5	9	10	18	15	4	2	10	10	7	4	10	2	4	0	0	4	1	0	4	5	13	12	14	15	8	7	4	1	3	1	3	2	6
LOC102654911	27	51	70	41	80	66	58	67	17	46	62	71	54	57	43	53	41	44	50	37	30	63	46	61	34	29	14	12	24	22	55	58	118	70	51	89	53	56	28	7	28	8	11	17	12
LOC102654919	66	171	126	141	168	197	174	134	97	135	190	186	248	242	213	220	296	297	261	316	250	196	200	98	258	121	71	85	162	106	234	278	609	493	374	540	378	232	308	76	199	122	122	158	89
LOC102654920	22	60	23	39	32	28	40	31	12	34	33	79	38	46	44	46	24	12	23	15	13	61	31	34	15	12	4	9	9	10	37	35	51	32	27	47	27	25	38	4	18	6	3	7	4
LOC102654925	5	27	16	9	34	20	20	9	12	22	24	36	41	41	33	24	37	25	33	23	19	41	31	23	31	15	14	6	7	11	28	35	45	48	53	35	42	34	36	4	28	16	15	13	4
LOC102654930	5	53	27	11	14	17	16	6	16	25	26	32	13	24	4	13	36	14	12	23	18	17	11	18	13	18	8	4	7	19	30	35	20	42	30	41	30	42	23	19	11	6	11	17	12
LOC102654936	367	1531	1890	1163	914	3898	2170	662	845	1433	632	1569	490	1038	890	1204	580	1362	567	1959	876	1157	1084	860	912	127	776	283	1094	153	767	1135	4201	826	1286	1607	1083	575	780	480	1182	617	846	797	699
LOC102654949	84	82	140	101	189	113	105	66	84	183	220	278	320	125	48	125	423	281	281	256	291	245	234	128	152	19	17	11	62	63	331	298	692	494	281	496	322	303	257	12	123	22	19	23	25
LOC102654952	81	310	199	144	344	193	206	140	75	201	299	367	279	253	315	283	210	218	197	147	154	300	201	159	185	119	54	70	101	84	152	216	426	325	278	330	275	261	200	54	137	57	70	96	80
LOC102654955	835	5198	2928	4984	4185	3600	7597	4336	1195	8332	5976	7530	15707	13102	6657	10013	7710	7433	6299	5774	9027	14908	9563	7119	3631	2180	1189	1959	2592	1364	5813	8374	9550	6669	7867	7708	11149	5784	7616	1064	2555	2154	2691	1515	1012
LOC102654959	4	3	11	17	6	6	3	2	4	9	13	8	10	11	3	5	10	39	16	22	19	10	11	1	9	3	3	1	3	6	4	20	33	27	24	26	10	4	12	0	5	2	10	9	2
LOC102654964	5	8	28	8	18	11	6	1	3	17	24	6	9	6	5	6	18	25	15	33	28	7	21	8	17	1	6	19	6	3	18	30	53	14	18	84	37	11	20	11	6	8	6	16	3
LOC102654965	1	5	3	2	3	1	1	3	2	2	4	3	6	2	4	5	8	2	3	3	7	13	4	6	2	5	4	0	10	3	2	6	10	3	4	7	1	0	5	13	4	22	26	5	2
LOC102654968	12	9	23	20	34	13	34	30	28	18	10	23	44	9	17	16	11	14	53	29	24	23	17	15	20	27	20	45	71	16	19	12	24	22	22	39	23	26	10	25	102	219	206	33	79
LOC102654970	26	15	42	28	90	46	41	16	32	36	57	28	77	43	25	24	66	69	87	81	65	39	53	24	30	19	14	8	14	24	44	71	173	58	57	75	75	67	30	25	16	17	23	42	13
LOC102654975	5	14	62	42	48	25	32	11	29	51	41	18	61	30	12	10	79	128	83	110	93	21	28	8	80	17	39	25	27	49	30	75	142	77	105	109	73	46	82	27	27	32	73	41	53
LOC102654986	0	0	0	0	1	0	1	0	0	0	0	0	0	2	0	0	1	1	1	1	0	0	0	0	0	1	0	0	0	0	0	0	0	0	2	0	0	0	0	0	1	0	0	0	3
LOC102654987	721	1666	1408	1457	1708	1791	1380	775	899	1649	2157	2494	1981	1866	1493	1395	2367	1757	1863	1741	1596	2170	1952	1587	1662	962	583	636	901	811	1262	1731	3709	3079	2331	2521	2440	2120	1783	495	1430	588	779	990	598
LOC102654993	4	8	5	3	5	9	9	6	3	11	10	23	21	12	11	6	9	16	15	13	11	13	15	4	12	8	4	1	3	3	21	25	28	19	10	21	17	31	8	3	5	6	3	7	2
LOC102654994	46	32	52	50	60	46	46	49	51	44	59	60	81	59	41	57	87	89	101	71	50	42	56	45	127	69	16	23	55	74	205	113	239	110	103	123	100	193	53	43	48	54	54	59	67
LOC102655008	26	72	35	59	64	53	71	45	30	49	61	75	87	67	75	78	58	39	89	77	61	59	52	52	46	19	14	32	27	23	72	66	124	89	37	119	74	70	31	17	61	26	30	32	24
LOC102655009	0	1	0	0	2	1	0	0	0	0	0	1	0	1	0	0	0	1	1	0	1	2	0	1	2	0	1	1	0	0	0	1	1	2	1	0	0	0	1	1	1	1	0	1	2
LOC102655030	109	455	339	351	375	440	416	143	147	473	662	501	595	638	482	470	864	704	679	551	752	682	605	353	587	305	202	230	341	240	273	616	1129	1211	723	962	859	389	616	206	406	255	322	262	211
LOC102655031	0	0	1	0	0	1	0	0	0	0	0	0	0	0	0	0	0	0	0	0	0	0	0	0	0	0	0	0	0	0	0	0	0	0	1	0	0	0	0	0	0	2	0	0	0
LOC102655034	22	34	48	27	59	39	58	37	35	32	43	47	50	57	31	35	66	50	58	61	46	37	38	38	48	44	17	16	18	24	72	70	112	95	74	80	61	92	30	9	27	8	14	28	14
LOC102655047	3	11	5	2	7	5	9	2	1	8	13	8	10	8	6	4	10	4	6	3	6	11	4	9	8	4	0	1	2	3	10	9	19	12	2	18	15	9	2	1	6	2	1	1	3
LOC102655050	3	17	18	11	23	18	30	22	12	6	10	16	26	32	24	19	20	20	28	23	13	14	31	10	16	14	6	4	9	1	37	21	44	30	28	44	32	21	13	5	6	3	5	7	5
LOC102655054	50	130	85	128	32	24	106	45	44	46	40	104	43	156	98	82	72	78	55	61	90	126	99	141	135	53	30	26	50	73	59	107	234	246	184	237	135	188	104	18	35	6	10	103	41
LOC102655057	0	1	0	1	1	0	0	1	0	0	0	1	1	1	0	0	0	0	0	2	0	0	0	0	0	0	0	0	0	0	0	1	2	0	1	3	0	5	0	0	0	0	0	0	0
LOC102655058	2	2	1	3	3	2	3	2	2	3	3	1	3	2	5	3	3	11	2	4	2	1	3	2	1	0	1	1	1	1	1	6	5	5	4	1	2	4	1	3	0	2	4	4	1
LOC102655072	9	12	36	39	42	35	20	15	21	42	58	28	55	40	19	14	55	73	67	94	92	38	45	16	48	12	22	15	38	33	37	68	133	122	91	94	57	33	50	21	29	46	54	30	27
LOC102655073	10	9	30	18	34	19	15	8	29	22	15	41	22	6	13	13	32	16	46	29	16	52	14	25	98	54	28	70	181	28	20	27	56	85	67	16	16	144	19	60	111	139	188	71	61
LOC102655078	2	2	0	3	2	2	1	3	0	0	1	5	0	4	0	1	0	0	1	4	0	1	0	3	0	0	1	0	1	1	1	1	7	1	6	1	1	2	1	0	3	1	1	0	0
LOC102655090	47	112	131	142	134	121	145	61	16	84	117	138	132	148	101	97	180	192	108	211	143	134	111	68	102	77	37	57	90	29	93	162	460	239	201	227	134	150	109	98	87	147	128	86	56
LOC102655092	0	0	2	0	3	6	0	0	1	1	0	1	3	0	0	0	0	0	3	0	0	0	0	1	0	0	0	0	0	1	0	1	5	3	0	0	0	1	1	0	1	0	0	1	0
LOC102655097	26	129	64	70	149	69	143	78	38	122	115	130	158	215	115	173	80	87	95	91	83	168	108	91	66	36	22	18	27	16	135	104	201	140	91	139	154	107	73	17	54	28	33	27	15
LOC102655100	195	416	405	227	786	443	505	517	275	209	370	320	573	630	333	421	625	450	769	580	410	289	376	224	336	171	79	115	205	119	892	600	1320	795	480	868	646	656	396	92	275	147	255	159	105
LOC102655102	0	0	0	0	0	0	0	0	0	0	0	0	0	0	0	0	0	2	0	1	0	0	0	0	0	0	0	0	1	0	0	0	0	0	1	1	0	0	0	0	0	0	2	0	1
LOC102655107	3	10	8	8	8	8	7	5	2	2	2	8	11	10	7	7	4	7	8	8	3	4	6	3	8	2	0	3	2	4	10	7	12	14	9	12	10	7	6	1	5	1	0	3	0
LOC102655111	13	22	33	16	32	27	25	18	23	26	36	66	54	48	43	41	52	47	32	38	53	50	46	26	37	21	16	10	41	30	23	44	107	67	58	62	47	56	39	21	27	19	20	38	6
LOC102655112	57	59	76	86	90	81	63	44	61	94	115	146	93	108	86	77	150	108	133	117	88	88	114	83	131	69	45	63	93	49	88	118	279	183	144	208	170	179	120	55	127	64	83	71	58
LOC102655120	49	142	125	156	132	205	139	61	36	180	184	233	146	201	157	145	222	280	157	225	177	221	232	112	153	87	86	76	120	94	65	253	643	391	290	378	205	114	257	114	155	88	116	117	97
LOC102655124	15	23	49	42	23	25	26	7	16	32	47	19	52	30	27	18	62	87	43	61	80	37	45	22	54	13	20	13	20	31	13	67	137	115	75	119	54	15	48	25	12	17	24	38	21
LOC102655126	122	285	127	140	290	194	172	150	141	184	138	440	224	255	245	352	170	142	147	97	95	303	204	208	122	75	37	38	62	48	258	162	328	237	205	306	223	350	120	22	141	25	40	68	20
LOC102655127	63	250	125	159	243	175	253	174	75	261	222	436	402	469	288	409	280	203	225	191	164	557	370	222	184	76	30	38	55	77	287	318	386	293	300	392	354	232	241	29	110	26	26	57	45
LOC102655130	2	1	0	0	0	3	0	2	3	2	2	1	0	2	1	3	3	1	1	1	0	0	1	1	4	2	5	0	1	1	3	3	6	6	1	0	2	5	2	2	2	3	3	0	3
LOC102655131	3	2	11	14	25	19	5	4	4	38	44	17	53	18	23	18	62	60	18	25	78	21	31	8	32	8	9	4	9	16	8	42	44	63	28	30	37	11	56	11	7	7	10	16	10
LOC102655134	0	0	0	0	0	0	0	0	0	0	2	0	0	0	0	0	2	0	0	2	1	0	0	0	1	0	0	0	1	2	1	1	0	0	0	1	0	0	0	0	1	5	2	1	0
LOC102655138	5	5	2	7	4	4	7	8	6	3	3	9	6	8	9	15	5	1	5	7	3	4	3	6	9	7	4	4	2	0	16	3	12	10	28	15	10	16	7	3	5	1	5	5	5
LOC102655139	4	7	4	8	10	13	8	15	0	10	6	10	13	12	14	13	2	15	6	12	16	12	7	10	2	4	2	4	4	0	18	4	11	10	7	12	12	12	1	3	4	6	8	5	3
LOC102655141	40	170	117	69	153	68	99	63	58	148	144	257	153	152	168	161	156	138	145	151	101	162	151	73	102	47	42	38	80	70	120	194	328	174	171	308	135	101	161	59	102	34	58	58	26
LOC102655147	2	0	1	0	2	1	1	0	0	0	3	2	4	4	0	0	5	2	1	1	8	0	3	0	4	3	0	0	0	2	3	0	7	6	7	6	1	1	3	0	4	2	0	2	1
LOC102655148	2	0	4	1	2	0	4	0	4	4	2	5	4	3	5	3	2	6	4	1	1	4	3	2	5	1	4	4	2	2	3	1	9	4	2	10	2	3	6	5	1	5	3	3	4
LOC102655153	9	10	4	19	4	10	7	7	1	12	9	26	10	18	13	7	16	16	6	4	63	33	2	14	1	1	1	3	0	1	2	54	19	19	26	36	165	3	89	4	2	0	2	0	2
LOC102655156	3	3	12	0	4	1	5	4	1	5	4	13	3	4	0	0	7	2	11	11	3	5	4	2	7	4	5	7	13	3	10	11	18	16	16	17	8	5	9	2	3	6	3	4	4
LOC102655168	2	5	6	5	2	4	7	0	4	5	9	2	0	4	4	5	9	7	8	1	10	2	1	6	3	3	3	1	3	4	2	6	16	10	3	5	11	1	5	6	2	0	10	5	5
LOC102655180	0	0	3	0	0	0	0	0	0	0	1	0	0	1	0	0	3	0	0	0	1	1	0	1	0	0	0	0	0	1	2	1	3	1	0	0	1	1	0	1	2	0	1	0	1
LOC102655185	615	675	7644	2567	1000	634	1474	722	397	11393	2024	17080	5317	5679	1003	2387	6175	4561	4748	7819	5139	2396	13702	4882	677	404	422	506	610	2458	3943	13790	14730	21821	1953	11511	6879	1837	13963	237	726	199	341	1249	1800
LOC102655188	7	20	35	17	28	30	25	10	20	20	26	16	32	35	22	19	40	22	32	25	34	27	30	19	19	12	8	10	11	10	25	28	63	47	28	31	20	25	20	12	13	7	13	15	7
LOC102655189	0	5	2	2	2	1	7	0	0	3	3	6	5	4	4	5	6	4	6	7	3	4	5	5	1	2	0	1	0	0	7	3	8	3	1	3	4	5	1	0	3	4	1	0	1
LOC102655202	2	0	0	0	1	2	0	1	0	0	4	0	0	0	0	0	0	0	0	1	0	0	0	1	16	1	8	3	2	14	0	0	0	2	30	1	1	11	1	0	22	2	0	4	2
LOC102655203	85	478	201	259	349	228	354	234	105	341	349	673	454	449	422	572	300	220	182	144	164	678	480	339	176	106	56	26	97	73	348	292	455	246	252	448	325	274	235	32	85	20	37	90	25
LOC102655213	0	2	3	1	1	4	0	1	1	1	6	1	2	5	1	2	2	2	7	2	6	4	0	2	0	1	0	2	2	0	3	4	3	2	5	6	1	1	0	1	2	3	2	4	2
LOC102655217	54	198	140	125	209	146	150	106	54	117	181	253	200	203	132	135	158	109	120	107	82	198	144	157	90	78	32	55	101	43	153	108	278	192	124	155	182	168	80	33	102	42	46	48	32
LOC102655218	0	1	1	1	2	1	0	1	1	1	2	1	1	2	0	1	1	1	0	0	1	5	0	0	2	0	0	0	0	0	2	3	3	5	3	2	2	1	3	0	0	0	0	0	2
LOC102655219	9	43	41	34	50	26	37	23	5	35	23	79	63	62	72	62	36	34	37	35	27	53	36	36	36	19	12	10	21	12	45	52	76	53	59	118	38	62	44	10	21	3	10	22	9
LOC102655220	35	55	32	36	41	30	38	25	23	56	29	47	55	39	26	30	53	41	58	29	35	48	53	36	16	11	9	10	17	11	32	34	62	59	34	62	78	52	41	11	31	14	27	13	14
LOC102655228	12	6	37	19	13	25	12	8	14	28	64	23	114	24	14	12	89	145	63	148	155	56	60	16	82	9	24	25	65	76	30	150	209	180	248	203	62	31	131	48	31	52	62	50	44
LOC102655229	1	2	2	1	2	1	5	2	1	5	1	3	1	3	0	0	3	4	9	6	6	1	3	0	1	0	0	0	0	1	3	4	10	5	5	6	4	6	4	4	2	1	6	1	2
LOC102655238	40	155	96	120	170	129	136	108	57	120	116	185	190	197	125	171	113	94	112	92	77	231	136	103	85	46	35	26	38	34	153	137	214	175	139	187	192	180	108	13	62	24	35	35	26
LOC102655240	8	37	28	14	40	18	20	16	22	19	27	44	41	36	20	33	19	14	21	18	28	27	18	24	19	15	2	7	15	9	41	34	30	36	22	31	24	60	21	6	23	7	8	3	7
LOC102655243	772	1824	1140	1576	1179	804	1123	361	947	984	1374	669	1282	1494	1484	1144	1690	1272	1131	880	1939	2584	1455	1441	936	566	250	378	761	524	692	1324	2595	2588	1153	1763	1578	999	1238	385	682	339	331	523	730
LOC102655244	48	107	131	101	98	145	121	57	97	131	195	178	186	190	164	185	295	234	224	253	207	205	199	104	241	125	102	92	133	159	183	230	588	468	332	347	277	197	248	100	153	109	161	183	93
LOC102655247	0	0	0	0	0	0	0	0	0	0	0	0	0	0	0	0	0	0	0	0	0	0	0	0	0	0	0	0	0	0	2	1	0	1	0	0	0	0	0	0	0	0	0	0	0
LOC102655249	0	0	0	2	2	0	0	0	0	0	1	0	1	0	0	0	1	0	0	2	0	0	0	0	0	0	0	0	0	0	0	3	0	1	0	0	0	0	0	0	0	0	0	1	0
LOC102655259	92	217	166	325	201	411	396	294	121	328	409	429	612	562	320	402	835	518	533	603	697	489	458	342	284	138	108	104	182	131	555	578	811	612	496	461	512	470	426	88	241	145	156	162	89
LOC102655263	60	165	108	158	134	179	200	88	44	161	192	215	258	210	124	160	195	183	128	139	182	326	166	145	137	96	54	46	62	66	133	157	360	237	209	253	233	196	176	47	118	44	79	60	50
LOC102655268	0	6	2	5	3	3	11	0	3	3	8	3	7	2	2	0	11	13	13	21	8	9	5	0	8	5	14	8	12	12	1	15	26	16	5	18	8	4	3	18	11	75	56	25	19
LOC102655272	225	453	325	398	513	313	360	332	216	285	435	674	515	447	315	393	347	296	326	306	289	436	326	259	273	194	70	85	136	110	509	274	652	475	430	406	444	674	246	64	190	73	120	191	82
LOC102655282	3	0	3	1	1	0	0	1	1	1	2	0	1	2	0	1	0	2	4	0	0	2	5	1	0	2	0	0	1	0	1	3	4	3	3	1	5	2	2	2	0	0	1	2	0
LOC102655284	50	110	105	111	128	143	153	104	68	98	103	189	215	197	142	159	180	161	182	177	133	143	148	93	159	80	42	64	100	74	218	254	415	284	269	321	260	252	201	47	116	58	66	87	44
LOC102655285	0	0	0	0	1	0	0	0	0	0	0	1	0	0	0	0	2	0	0	0	0	0	0	0	1	2	0	0	0	0	0	2	1	0	1	0	1	0	0	0	1	0	0	0	0
LOC102655287	1	0	1	0	0	0	0	0	0	0	0	1	0	0	0	1	0	1	0	0	0	0	0	0	0	0	0	0	1	0	0	0	0	0	0	1	0	0	0	1	0	0	0	0	0
LOC102655306	1	2	2	1	1	0	0	1	2	0	1	2	0	0	1	0	2	2	3	0	4	4	2	3	1	3	0	0	0	0	0	1	7	5	0	1	0	2	1	2	7	1	1	1	3
LOC102655319	3	4	10	35	8	17	17	18	1	14	12	14	44	85	27	20	18	27	27	25	106	48	6	20	4	4	0	1	6	9	7	31	57	16	39	44	31	8	56	1	19	14	5	5	3
LOC102655329	2127	2021	4291	3931	3966	4070	2421	651	2155	3520	5477	4619	4858	4646	2933	1988	5784	6229	5031	5740	6990	4147	3507	1937	5384	1671	2373	2045	2815	3188	1004	6095	10191	7794	7614	8606	5604	2138	4827	2408	2695	2143	3135	3327	2721
LOC102655332	58	95	123	95	103	52	56	18	17	87	133	125	80	103	59	53	184	155	138	124	128	112	141	111	145	119	174	102	123	109	32	114	267	172	188	251	150	82	186	145	179	199	194	251	140
LOC102655352	0	1	0	0	0	0	2	1	0	0	0	0	0	0	1	1	2	2	1	1	1	1	2	0	0	1	0	0	2	0	2	3	1	2	0	2	0	2	0	1	0	1	0	2	0
LOC102655353	0	0	0	0	0	0	0	0	0	0	0	0	0	0	0	0	0	0	0	0	0	0	0	0	0	0	0	0	0	0	0	0	2	0	0	0	0	0	0	0	0	0	0	0	0
LOC102655356	5	25	12	18	24	13	37	18	0	14	37	19	17	25	20	17	42	26	26	26	29	24	11	13	52	22	13	10	13	37	11	9	51	41	59	27	28	46	42	7	16	3	9	35	22
LOC102655357	42	156	97	110	121	119	107	55	39	100	111	132	148	99	132	114	127	138	126	117	135	167	117	89	132	53	37	34	73	47	108	135	334	179	164	201	152	111	131	47	61	43	67	68	67
LOC102655367	0	0	0	0	0	2	0	1	0	0	0	0	0	0	1	2	3	0	3	0	2	0	1	0	3	2	0	0	1	0	1	1	3	1	2	2	0	0	0	0	0	0	0	1	0
LOC102655388	44	158	62	64	141	65	81	56	22	87	112	170	99	104	97	122	61	64	44	64	48	158	90	88	46	38	18	26	28	29	62	51	120	55	73	77	64	59	42	6	45	12	18	25	12
LOC102655391	0	2	5	2	1	4	10	1	0	3	5	5	7	5	3	2	6	3	7	2	5	3	0	5	1	8	2	1	8	3	2	5	6	1	8	7	5	10	4	1	8	3	1	4	1
LOC102655392	12	7	14	7	12	8	9	6	1	8	18	7	10	9	7	6	21	20	24	22	24	5	7	4	6	5	3	3	4	8	14	12	30	11	9	17	16	7	13	7	1	1	6	11	5
LOC102655399	56	102	91	68	148	67	107	73	63	120	97	173	110	91	104	137	87	65	78	101	48	129	81	73	74	73	35	35	55	34	154	84	226	169	127	149	116	153	68	36	80	40	47	49	34
LOC102655407	783	2169	2460	2636	2295	2797	2591	1441	1324	2718	3665	3694	3425	3943	3410	2942	4108	4182	3157	3532	3912	3748	3716	2464	3436	1576	1245	1100	1950	1711	2212	4797	7440	4853	4829	6889	5056	3352	3220	1327	2905	1502	1784	1881	1318
LOC102655411	64	151	104	105	138	120	120	78	54	132	154	188	186	157	127	159	152	161	158	181	157	151	147	88	146	90	53	58	79	60	134	170	323	243	271	257	177	212	157	52	110	33	66	62	33
LOC102655420	11	38	26	21	45	30	52	29	22	25	31	53	55	76	66	91	42	39	30	31	49	73	58	21	30	20	13	7	12	11	78	56	116	56	52	68	62	53	52	7	15	8	5	14	12
LOC102655422	2	1	4	3	1	1	4	0	1	2	1	1	1	3	1	1	6	6	1	0	2	4	3	1	4	3	0	1	3	2	3	5	24	10	1	5	3	4	1	0	1	1	5	5	2
LOC102655429	0	0	0	0	0	0	0	0	0	0	0	0	0	0	0	0	0	0	0	0	0	0	0	0	0	0	0	0	0	0	0	0	0	0	0	0	0	0	0	0	0	0	0	0	0
LOC102655434	0	0	1	0	0	0	0	1	0	0	0	0	0	0	0	0	0	0	0	1	0	0	0	0	0	0	0	0	1	0	0	0	0	1	2	3	0	0	0	0	0	0	0	0	0
LOC102655435	0	0	0	0	2	0	1	0	0	0	0	0	1	0	0	0	0	0	1	0	0	0	1	0	1	0	1	0	0	0	0	0	2	0	1	1	1	0	1	0	0	0	0	0	0
LOC102655436	1	0	4	4	2	0	0	0	4	1	2	1	0	1	0	1	2	4	3	2	2	3	2	1	2	0	1	0	1	1	0	1	6	4	4	6	2	0	4	3	3	7	4	6	1
LOC102655440	224	751	307	481	677	489	952	645	258	708	742	1242	1450	1316	877	1365	830	507	594	421	480	1726	998	896	274	175	75	99	124	95	935	689	1042	604	627	626	819	797	554	68	204	103	129	131	55
LOC102655446	2	11	32	13	19	25	36	15	9	12	33	22	45	17	31	30	48	40	27	28	61	37	27	12	47	42	11	18	50	25	17	55	68	50	55	92	46	44	41	31	26	41	46	35	22
LOC102655449	2	0	0	0	1	0	5	2	2	1	0	0	1	0	1	0	3	2	0	1	0	1	2	4	0	0	3	0	0	0	0	0	3	3	4	0	1	3	0	1	2	1	1	0	1
LOC102655452	157	451	215	225	308	208	298	244	166	249	285	493	357	323	328	443	256	172	217	145	141	467	277	297	124	94	58	71	92	68	322	207	361	243	248	297	287	309	175	36	126	58	70	63	43
LOC102655457	19	13	2	31	52	13	1	1	2	9	12	5	52	4	0	0	31	39	18	31	21	2	8	9	7	1	0	0	0	0	11	13	1	11	4	33	21	3	23	0	0	0	4	1	0
LOC102655461	15	29	13	16	18	20	24	22	12	13	21	38	33	23	23	23	15	12	14	21	4	23	14	7	17	6	4	11	11	6	43	26	40	29	27	27	28	37	15	7	20	7	7	7	2
LOC102655463	5	25	17	9	32	13	20	24	4	21	30	31	23	33	36	44	21	11	22	12	16	16	26	21	12	11	2	5	6	13	13	26	48	33	22	38	29	28	12	3	16	2	1	11	3
LOC102655466	10	49	21	23	56	22	33	29	20	47	44	44	36	27	26	43	24	20	16	23	21	41	41	15	19	12	8	9	9	7	39	33	52	35	36	48	35	33	20	5	14	2	7	11	8
LOC102655469	4	3	11	8	12	13	19	4	0	4	7	8	9	12	9	18	10	4	6	7	4	11	16	8	6	2	3	6	11	7	24	10	39	15	13	4	9	28	3	7	7	4	12	7	7
LOC102655470	0	6	9	5	10	1	3	5	2	4	2	5	7	4	5	9	5	2	6	2	4	8	11	4	3	1	3	4	5	3	7	3	13	3	5	8	4	12	6	2	5	3	1	4	8
LOC102655476	0	0	0	0	0	0	0	0	0	0	0	0	0	0	1	0	0	0	0	0	0	0	0	0	0	0	0	0	0	0	0	0	0	0	0	0	1	0	0	0	0	0	0	0	0
LOC102655479	35	64	115	80	78	55	74	47	27	73	123	77	140	138	75	64	141	172	112	166	143	88	103	64	127	35	45	50	72	100	71	166	340	243	212	282	178	116	170	60	56	63	82	95	87
LOC102655493	0	0	0	0	0	0	0	0	0	0	0	0	0	0	0	0	0	0	0	0	0	0	0	0	0	0	0	0	0	0	0	0	1	0	0	0	0	0	0	0	0	0	0	0	0
LOC102655495	0	0	5	0	1	0	2	1	0	0	2	0	0	1	2	1	0	3	3	2	0	4	0	4	6	2	1	2	1	0	1	0	1	1	1	1	0	1	1	0	1	1	3	1	2
LOC102655503	34	97	123	102	126	109	131	151	63	87	141	133	229	206	152	185	263	327	289	269	304	117	133	48	229	98	77	50	106	120	327	429	720	479	475	641	353	300	291	45	81	79	72	153	88
LOC102655512	6	13	18	18	15	10	6	9	4	29	18	16	13	18	13	9	50	60	38	29	39	23	9	27	11	1	14	6	19	7	5	32	45	40	16	47	37	4	43	4	12	9	11	2	13
LOC102655520	0	0	1	0	0	0	0	0	2	0	1	0	2	0	0	0	1	1	2	1	2	0	0	0	1	0	0	0	1	1	0	1	1	0	1	1	1	0	1	0	0	0	0	1	1
LOC102655521	2	8	8	6	16	8	2	14	3	3	7	5	10	5	16	11	13	10	1	6	4	10	6	7	9	8	6	8	21	10	12	7	19	10	10	21	4	14	3	3	22	23	19	12	9
LOC102655523	43	89	47	93	105	102	67	39	54	53	107	161	132	110	95	121	100	94	101	99	66	116	103	81	67	68	20	25	48	32	72	93	206	197	137	135	130	147	90	26	80	24	34	25	21
LOC102655530	0	1	0	5	2	0	5	0	0	1	11	3	5	3	0	0	3	1	0	5	2	3	2	1	2	3	0	3	3	2	0	0	6	4	2	1	3	5	1	3	1	2	1	2	6
LOC102655538	1	9	6	4	8	3	9	9	3	5	10	10	14	12	8	17	14	2	5	4	2	17	11	8	4	7	1	0	1	4	21	4	22	8	5	23	12	12	7	4	2	1	0	4	5
LOC102655540	66	83	88	107	87	117	88	33	86	81	176	185	165	126	77	73	198	195	150	162	179	168	118	90	177	64	54	80	82	86	76	183	300	268	177	257	205	138	157	63	114	44	58	101	57
LOC102655553	0	0	1	1	0	0	0	0	0	3	0	0	0	0	0	0	0	1	2	3	1	1	1	0	0	0	0	0	0	0	0	0	3	1	1	0	0	1	0	0	2	0	0	0	0
LOC102655559	2	8	5	4	9	2	2	5	7	4	3	10	7	8	6	5	5	7	8	4	3	5	4	0	9	4	0	2	2	2	0	7	14	6	9	11	10	9	2	0	3	4	2	4	2
LOC102655563	10	20	14	23	58	33	24	14	11	15	11	39	20	28	28	25	29	15	25	15	14	31	28	14	14	13	13	3	9	5	47	27	34	28	33	29	21	62	23	3	16	7	14	11	7
LOC102655564	3	4	7	5	6	10	12	2	2	13	9	5	9	18	8	16	33	14	14	25	21	11	14	8	9	5	6	3	2	0	8	21	32	43	15	15	22	31	14	3	6	4	9	6	3
LOC102655585	11	40	22	28	45	62	61	25	17	56	21	87	77	76	44	94	38	28	32	17	31	97	54	44	23	11	4	14	15	16	48	27	97	32	56	54	70	64	39	3	7	4	12	13	7
LOC102655592	1	3	2	1	2	0	3	1	1	0	6	1	7	1	3	1	2	2	1	2	1	3	5	1	5	2	1	3	4	1	7	2	9	2	2	1	3	4	1	2	3	5	1	2	1
LOC102655603	129	365	293	298	311	338	306	153	168	291	545	495	437	390	333	305	577	389	473	466	331	414	377	283	426	228	139	171	273	207	248	398	772	832	541	599	508	510	415	128	383	129	191	238	135
LOC102655612	54	127	98	116	147	110	149	108	53	122	139	215	241	207	193	185	230	152	174	162	119	248	200	126	131	94	40	44	84	72	169	162	326	284	219	266	235	211	137	39	118	29	50	72	46
LOC102655617	33	176	90	107	150	98	115	75	12	146	171	169	161	174	155	174	146	119	121	127	80	215	157	109	104	31	26	27	38	31	84	122	188	153	146	189	175	102	89	12	56	19	30	43	23
LOC102655618	37	152	100	119	144	133	157	99	75	145	166	251	262	258	232	240	328	263	225	237	211	221	229	115	223	85	60	69	118	97	182	341	531	433	352	429	351	257	276	48	199	51	72	118	71
LOC102655622	486	1101	343	677	1462	926	742	533	573	1357	670	1568	1433	873	566	1204	1473	702	1113	459	697	1091	1817	674	1963	850	360	215	239	612	1820	580	6573	3434	1935	832	1122	1443	691	67	707	46	50	179	447
LOC102655631	396	1341	639	968	1364	854	239	386	137	816	900	1082	1088	1025	417	759	824	609	709	721	527	735	925	582	818	529	292	303	306	435	668	593	3227	1262	1619	1136	789	1166	890	123	806	91	57	601	225
LOC102655636	1	10	5	1	2	1	7	7	0	6	1	4	3	5	6	7	2	1	0	2	0	6	6	0	0	2	0	1	0	0	4	11	5	5	7	7	3	3	1	3	2	0	0	2	0
LOC102655639	0	7	7	19	8	10	15	10	5	7	23	12	34	28	27	10	51	24	62	26	51	21	8	22	15	8	15	10	23	21	23	23	39	43	38	35	19	12	13	16	15	29	50	20	26
LOC102655648	94	354	159	276	253	161	126	84	59	177	280	356	325	348	198	242	307	354	195	247	233	381	301	200	291	141	102	91	152	122	193	267	855	563	473	588	451	314	348	46	285	54	69	173	66
LOC102655654	0	0	0	0	0	0	0	0	0	0	2	0	0	0	0	0	0	0	0	0	0	0	0	0	0	0	0	0	0	2	0	0	0	1	0	0	0	0	0	0	1	1	0	1	0
LOC102655661	0	5	8	37	20	10	32	0	6	6	18	5	66	13	2	9	9	38	12	79	55	26	30	1	24	2	10	10	24	24	45	22	133	21	62	46	13	9	7	18	8	23	24	29	14
LOC102655663	3	10	9	12	16	5	5	16	0	2	11	7	13	12	13	12	7	9	8	12	6	6	10	3	7	3	1	3	1	4	24	10	30	12	9	11	7	21	4	0	7	2	7	8	3
LOC102655670	3	6	0	3	5	3	0	4	3	5	4	6	6	4	5	3	5	1	0	3	2	4	2	5	3	0	1	0	5	1	3	4	4	2	5	7	3	3	5	1	0	1	1	2	0
LOC102655673	111	260	184	236	282	262	505	280	114	253	309	351	549	454	392	586	531	415	408	340	416	426	396	285	320	208	114	135	164	115	744	434	906	701	448	466	704	657	403	96	202	145	168	142	84
LOC102655679	97	98	83	95	132	197	158	132	121	91	135	176	220	219	163	208	223	171	241	186	192	150	138	98	173	95	58	70	76	94	426	260	481	258	298	308	347	486	197	52	108	56	56	108	57
LOC102655688	64	189	87	98	169	95	146	142	114	89	91	238	170	155	175	222	129	93	137	104	82	123	116	91	83	63	25	49	81	58	198	117	300	198	136	218	172	263	113	26	98	57	39	57	34
LOC102655689	14	33	35	50	83	59	90	53	21	48	47	79	71	80	86	104	51	42	69	49	29	63	45	39	60	34	11	20	30	23	82	79	128	100	76	113	80	93	45	15	33	14	30	27	9
LOC102655690	0	0	0	0	0	0	0	0	0	0	0	0	1	0	0	0	0	0	0	0	0	0	0	0	0	0	2	0	0	0	0	0	0	0	0	0	0	0	0	0	0	2	0	1	0
LOC102655697	0	0	0	0	0	0	0	0	0	0	0	0	0	0	0	0	0	0	0	0	0	0	0	0	0	0	0	0	0	0	0	0	0	0	0	0	0	0	0	0	0	0	0	0	0
LOC102655706	21	14	44	48	52	30	35	5	22	47	80	32	67	46	43	30	105	109	85	103	111	46	40	18	86	31	39	16	41	82	11	100	176	164	152	153	70	40	102	55	27	40	35	64	50
LOC102655709	0	0	0	0	0	0	0	0	0	0	0	0	0	0	0	0	0	0	0	0	0	0	0	0	0	0	0	0	0	0	1	0	0	0	3	0	0	0	0	0	0	0	0	0	0
LOC102655710	1	0	17	11	0	1	3	0	0	3	7	13	3	21	7	3	3	19	5	23	38	4	14	6	7	1	6	3	0	4	3	28	48	15	9	39	15	1	22	1	2	8	7	7	1
LOC102655712	0	1	1	0	2	0	0	0	0	0	0	0	0	0	1	1	1	1	1	1	1	1	0	2	1	3	0	1	0	2	3	0	7	1	1	1	1	0	1	1	1	1	2	1	2
LOC102655737	14	12	34	32	40	36	23	13	37	47	98	19	90	68	39	35	88	121	73	142	110	38	48	22	143	20	33	18	12	49	36	86	186	164	92	130	70	91	73	36	20	48	49	57	48
LOC102655740	2	3	5	2	5	6	10	5	2	2	4	5	4	12	9	8	11	5	9	5	6	6	8	7	8	3	4	6	7	4	18	11	15	16	11	20	12	17	8	0	14	3	2	3	4
LOC102655754	4	17	11	13	14	15	11	5	4	10	16	30	20	15	13	23	24	29	20	20	27	19	21	14	29	13	6	9	5	13	15	32	42	20	30	33	26	12	30	3	16	6	11	4	14
LOC102655756	121	77	127	223	144	283	303	155	341	350	395	287	599	460	233	314	530	441	332	197	662	475	439	165	342	75	50	48	53	89	382	234	377	256	645	376	530	716	226	36	124	30	56	39	25
LOC102655762	6	6	6	1	0	2	4	2	14	8	4	10	2	24	1	4	7	3	72	152	2	2	36	5	17	12	16	1	0	9	1	7	55	6	23	13	19	1	14	4	7	1	3	5	4
LOC102655764	0	0	2	0	2	1	0	0	1	0	1	4	0	1	0	0	2	2	3	0	0	0	0	3	2	2	0	0	0	1	0	0	2	2	0	5	0	0	0	0	0	1	0	1	0
LOC102655765	102	332	132	267	205	479	450	236	59	421	422	641	703	597	371	646	462	294	278	351	377	833	532	414	162	68	32	44	55	47	443	205	489	261	313	358	398	449	242	23	148	22	30	26	40
LOC102655778	74	316	190	186	314	275	283	188	140	226	286	375	375	441	334	426	440	286	350	390	336	418	307	179	300	164	102	92	116	122	414	457	664	595	435	526	563	470	329	71	187	76	63	142	89
LOC102655783	0	0	0	0	0	0	0	0	3	0	0	0	0	0	0	0	0	0	2	0	0	0	0	0	0	0	0	0	0	0	0	0	0	0	0	1	0	0	0	0	0	1	0	0	1
LOC102655788	181	222	284	47	1045	493	429	160	302	384	162	345	344	130	115	118	282	115	458	409	52	373	247	144	457	205	920	434	369	415	323	85	540	195	282	177	201	764	105	279	886	361	477	1554	323
LOC102655796	44	227	100	80	112	76	175	170	51	148	142	216	89	195	217	239	96	92	72	66	53	205	156	130	57	54	26	18	34	37	181	145	169	122	80	216	148	104	95	16	66	15	17	38	22
LOC102655798	0	4	4	0	1	1	3	0	4	6	2	2	9	4	8	6	2	2	0	10	0	3	2	0	3	3	2	0	2	3	3	9	18	5	4	3	3	0	5	2	0	0	1	5	1
LOC102655810	0	0	1	0	1	0	1	0	0	0	1	0	0	0	0	0	0	1	2	1	0	1	0	0	0	0	0	0	2	0	0	0	0	0	0	0	0	0	0	1	0	0	0	0	0
LOC102655811	0	9	5	0	2	2	1	3	2	5	1	16	0	1	4	6	1	1	0	5	0	1	3	5	1	0	0	0	1	0	1	3	1	0	5	4	10	6	1	0	1	1	0	1	0
LOC102655814	162	260	275	547	870	878	532	162	208	397	531	376	1120	213	309	352	641	655	382	572	524	391	416	241	344	210	143	179	234	249	466	356	1169	615	658	403	549	563	433	103	406	186	282	365	198
LOC102655815	1	2	4	1	1	0	0	0	1	0	0	1	6	1	0	0	0	3	1	4	4	2	3	3	1	0	0	0	1	2	0	6	7	2	0	0	2	1	3	0	0	0	0	1	1
LOC102655819	3	0	40	5	12	4	5	4	0	23	2	3	3	6	5	2	32	92	9	3	10	1	0	8	62	11	13	2	5	1	1	13	20	14	18	128	15	13	50	2	1	0	2	2	0
LOC102655824	1	4	0	2	2	1	2	0	0	1	3	1	4	7	1	1	2	2	1	1	2	0	0	0	1	0	0	0	0	2	0	2	5	1	2	0	1	3	4	0	1	0	0	0	1
LOC102655825	0	1	3	0	4	2	0	0	0	0	3	0	1	0	3	2	2	3	2	1	0	1	0	3	1	1	0	0	2	0	2	6	4	3	5	1	1	1	3	0	1	0	3	0	0
LOC102655836	20	47	65	52	77	47	92	63	39	46	60	99	100	118	120	123	80	95	104	81	60	93	62	21	61	34	18	24	34	33	143	90	194	146	117	157	120	148	80	12	34	14	24	36	22
LOC102655838	35	38	50	57	39	91	50	28	6	45	73	85	39	53	59	60	72	87	56	52	80	52	54	33	42	17	17	6	24	12	54	54	130	70	81	93	70	60	77	24	26	13	21	29	14
LOC102655841	132	377	258	311	371	353	412	279	129	323	425	474	506	478	382	470	523	422	348	380	336	437	444	328	342	167	100	135	154	166	481	433	841	561	452	532	550	548	369	75	240	106	123	196	113
LOC102655844	0	0	0	0	0	0	0	0	0	0	0	0	0	0	0	0	0	0	0	0	0	0	0	1	0	0	0	0	0	0	0	0	3	0	0	0	0	0	0	0	0	0	0	0	0
LOC102655857	1	0	0	0	0	0	0	0	0	0	0	1	0	0	0	1	2	0	1	0	1	1	1	0	0	1	1	0	0	0	0	1	1	2	1	1	1	0	0	0	0	0	0	0	1
LOC102655858	0	1	1	0	0	1	0	0	0	2	0	0	0	0	0	0	2	5	2	0	0	2	0	1	1	1	0	1	0	0	3	1	2	0	2	1	1	1	1	0	1	0	3	0	0
LOC102655859	1	3	3	3	4	1	4	0	2	0	2	2	6	2	1	1	5	1	1	7	2	3	5	2	4	2	0	1	1	0	5	5	4	6	5	5	8	7	3	0	3	0	4	1	1
LOC102655877	35	101	96	74	124	90	111	76	76	92	130	155	153	164	117	154	130	121	131	132	99	144	121	71	111	82	35	55	57	46	141	135	295	209	166	171	186	133	116	31	109	50	54	63	29
LOC102655879	12	20	35	25	30	54	27	21	5	30	44	32	75	45	44	49	77	72	72	63	105	41	35	23	86	27	27	23	52	22	50	72	175	104	113	175	78	49	56	31	32	53	33	37	17
LOC102655882	0	0	0	0	0	0	0	0	0	0	0	0	0	0	0	0	0	0	0	0	0	0	0	0	0	0	0	0	0	0	0	0	0	0	0	0	0	0	0	0	0	0	0	0	0
LOC102655889	1	2	2	2	0	0	1	3	4	1	0	0	3	2	9	13	9	6	5	9	5	0	2	1	3	6	0	1	8	1	19	11	18	2	9	14	10	18	8	2	3	7	11	11	7
LOC102655890	2	2	3	0	2	3	2	0	1	11	12	19	1	2	2	1	64	11	2	2	8	8	3	2	4	0	2	1	5	4	2	3	3	9	4	5	1	8	0	5	7	9	10	0	6
LOC102655896	272	762	893	857	666	736	828	364	202	745	940	1098	941	1061	790	682	917	846	811	788	940	942	965	808	874	438	314	381	529	384	293	914	2093	1462	1117	1558	1151	649	885	281	714	412	473	546	337
LOC102655897	1	3	5	3	0	2	3	2	0	3	0	2	2	1	2	3	2	1	0	0	1	2	2	0	2	1	0	1	1	0	1	3	2	1	2	2	1	2	5	1	0	0	1	0	0
LOC102655898	22	96	73	68	118	55	72	47	44	89	77	124	112	109	113	125	82	60	66	91	53	122	77	51	75	37	22	35	53	28	59	103	196	125	99	146	70	75	69	18	55	17	25	42	19
LOC102655899	1	2	2	3	8	1	2	0	1	2	6	0	5	5	0	0	1	3	4	3	1	1	3	1	2	1	1	0	1	1	5	7	9	1	3	16	2	2	0	1	0	0	1	0	1
LOC102655904	410	721	666	613	829	742	770	484	360	661	1015	884	842	763	579	691	893	572	737	614	632	823	790	715	509	412	257	306	418	230	829	578	1627	988	717	916	845	981	553	243	570	299	398	336	188
LOC102655905	7	7	2	2	9	6	16	15	4	4	6	12	13	13	23	23	10	0	7	5	6	19	12	8	2	3	0	1	7	2	18	11	13	8	14	21	16	16	12	2	9	4	9	2	5
LOC102655922	0	2	0	0	0	0	2	0	1	0	0	0	0	0	0	0	1	1	0	0	0	0	0	0	1	0	0	0	0	0	1	0	1	0	0	0	1	0	0	1	0	3	3	1	1
LOC102655924	8	6	12	11	8	20	18	7	3	8	9	13	9	12	10	14	19	9	8	9	10	22	13	12	18	19	8	7	11	8	8	17	21	10	19	17	11	14	9	4	8	16	13	11	6
LOC102655928	0	1	4	3	3	3	2	0	0	3	2	1	3	1	3	2	1	0	0	3	3	2	6	0	2	1	2	0	0	1	1	4	28	5	2	8	0	1	2	2	0	1	2	0	1
LOC102655942	3	27	8	14	11	13	22	5	1	10	5	23	13	20	24	18	15	14	12	6	10	42	26	35	11	7	5	1	3	4	14	19	37	18	8	21	11	9	6	1	9	0	0	4	5
LOC102655945	0	0	0	0	0	1	0	0	0	0	0	0	1	0	0	0	0	0	0	0	0	0	0	0	0	0	0	0	0	0	1	0	0	0	0	0	0	0	0	0	0	1	0	0	0
LOC102655948	16	36	22	21	55	36	24	21	13	41	47	60	44	53	52	50	45	31	32	22	18	43	46	23	28	16	10	16	11	9	27	28	58	49	35	52	34	26	29	13	45	10	23	15	10
LOC102655950	6	24	35	22	20	43	35	40	19	31	26	35	20	44	38	30	36	29	25	27	33	27	35	30	25	18	13	12	18	8	38	34	77	58	61	56	75	34	49	6	24	10	20	9	4
LOC102655953	4	11	17	9	27	13	9	24	5	6	7	26	41	8	36	26	19	15	23	65	25	17	20	22	74	8	9	7	28	17	8	48	70	73	90	59	20	57	16	6	20	14	6	31	13
LOC102655970	0	0	0	0	0	0	0	0	0	0	0	0	0	0	0	0	0	0	0	0	0	0	0	0	0	0	0	0	0	0	0	0	0	0	0	0	0	0	0	0	0	0	0	0	0
LOC102655971	38	97	97	71	97	84	89	53	73	109	115	154	143	178	157	141	134	121	121	139	91	122	143	69	118	69	59	33	60	63	78	137	312	231	199	241	168	148	122	44	108	44	47	87	40
LOC102655979	0	9	8	2	6	4	6	3	1	2	4	5	5	11	4	2	3	5	7	3	2	1	7	4	3	3	5	2	1	2	1	7	13	7	7	9	6	2	3	2	1	0	1	5	1
LOC102655980	37	81	201	145	130	147	119	68	80	113	218	130	243	229	126	100	223	331	300	500	302	141	141	53	306	89	110	98	140	143	109	352	727	516	481	541	241	157	295	128	97	176	260	182	121
LOC102655983	53	152	83	105	124	72	62	52	33	98	106	186	123	150	98	116	127	151	127	124	102	137	131	76	124	92	41	69	89	60	138	116	328	162	212	232	163	251	143	17	160	42	38	56	32
LOC102655994	18	83	51	65	115	59	103	53	24	68	83	133	167	156	150	145	164	149	115	142	89	113	126	45	116	61	28	38	85	64	119	205	289	241	191	353	192	151	147	38	92	40	46	79	44
LOC102656006	71	173	140	111	194	165	146	79	53	158	172	247	226	247	213	200	244	218	170	156	204	261	170	127	165	118	67	69	87	97	131	226	416	320	298	289	250	166	217	57	118	51	78	111	58
LOC102656008	7	13	13	8	13	5	5	12	5	8	10	12	11	18	8	5	22	8	12	18	24	7	20	9	12	4	4	6	5	5	6	14	31	19	15	25	25	17	7	2	12	5	4	12	4
LOC102656021	55	125	116	129	147	160	134	46	53	109	200	193	257	228	127	136	259	282	224	284	248	149	158	95	229	113	89	80	132	100	90	290	558	421	372	347	286	192	254	99	113	116	179	145	90
LOC102656027	2	7	7	8	2	5	7	3	4	3	3	5	6	2	2	3	10	7	9	16	14	6	4	2	10	12	2	7	2	5	24	14	24	6	9	11	11	31	11	2	0	2	5	7	8
LOC102656029	9	2	6	7	11	6	5	4	1	4	5	2	12	7	1	1	8	13	11	10	13	7	3	4	3	0	0	2	3	4	3	12	30	15	7	21	9	7	3	3	6	2	2	2	1
LOC102656037	5	4	16	7	4	11	8	2	7	12	12	11	7	11	5	5	12	16	10	18	29	4	6	3	22	2	10	0	7	3	11	22	45	32	20	30	20	33	24	7	8	5	9	5	9
LOC102656055	7	12	18	16	15	18	26	12	5	26	8	16	34	39	18	21	18	20	24	28	7	16	28	18	22	11	4	9	6	4	33	36	65	29	36	56	19	18	17	9	16	16	10	12	4
LOC102656061	0	2	0	0	2	2	2	2	0	0	1	1	1	2	0	1	0	0	1	0	1	1	0	0	0	0	0	0	0	0	4	1	1	1	0	1	4	2	1	0	0	0	1	0	0
LOC102656070	5	7	23	19	11	14	7	1	1	14	48	8	42	25	21	10	72	81	40	77	119	21	25	9	32	8	30	17	18	22	4	72	67	55	63	100	43	6	62	32	22	28	30	20	24
LOC102656074	939	1544	1491	1743	2114	2261	2140	1603	1108	1321	2012	2298	2238	1987	1842	2182	2322	2042	2168	1876	2115	1774	1908	1336	1617	1057	673	676	1000	930	2757	1902	4883	2908	2648	2959	2689	3568	2005	564	1379	891	1139	1010	796
LOC102656082	0	0	0	0	0	0	0	0	0	0	0	0	0	0	0	0	0	0	0	0	0	0	0	0	0	0	0	2	1	0	0	0	0	0	0	0	0	0	0	0	0	1	2	0	0
LOC102656085	122	326	203	178	360	275	223	206	133	241	211	443	432	502	582	461	401	473	505	497	385	334	423	212	450	163	112	141	182	160	326	383	784	671	661	932	648	503	528	87	264	137	224	249	119
LOC102656088	30	107	71	28	53	22	94	85	26	22	39	128	52	61	90	80	62	42	86	58	32	74	67	54	53	37	17	23	27	22	93	65	159	115	64	74	96	147	61	8	44	11	15	34	16
LOC102656093	21	41	47	27	48	53	81	34	22	33	52	69	77	78	64	69	71	71	84	78	44	55	60	22	84	34	13	24	37	39	84	76	184	132	97	126	104	104	74	17	53	18	40	20	16
LOC102656101	24	4	2	9	20	13	0	4	1	7	33	8	13	2	12	10	111	26	123	65	36	14	17	2	75	59	15	49	47	69	72	1	66	275	57	3	5	134	1	1	81	28	2	117	34
LOC102656107	141	185	177	152	209	256	256	167	137	174	256	288	339	329	306	342	384	299	299	308	291	249	239	223	294	146	72	96	171	135	428	390	760	675	423	518	545	537	255	73	192	100	154	172	128
LOC102656116	11	9	11	7	18	12	9	6	5	12	12	19	18	13	18	13	12	2	3	5	4	28	6	8	10	1	2	1	3	3	6	5	5	14	7	7	5	16	5	1	11	2	5	5	3
LOC102656131	33	101	79	101	137	123	104	59	21	125	137	125	183	150	117	125	154	129	107	135	104	149	131	83	120	70	46	44	61	60	83	126	248	217	188	185	155	151	94	28	110	37	42	67	45
LOC102656132	12	41	30	23	34	50	49	41	29	35	46	51	45	68	53	56	32	44	34	18	32	88	45	44	40	22	10	12	16	16	45	55	91	65	55	67	56	39	29	11	30	10	19	18	13
LOC102656134	71	123	158	192	168	175	132	66	55	184	231	215	270	184	198	158	397	367	233	267	375	270	204	132	259	73	98	108	137	124	137	258	513	454	366	341	293	190	297	83	137	86	110	148	96
LOC102656136	142	446	292	299	421	346	515	419	158	362	412	682	529	579	479	612	349	309	342	312	242	608	403	384	272	158	114	80	152	100	614	512	732	462	392	575	545	537	294	100	190	95	128	129	82
LOC102656137	75	151	113	89	201	163	266	209	91	104	152	186	244	248	242	274	253	182	297	225	155	188	207	110	192	143	80	73	133	92	554	318	595	364	276	435	340	515	204	68	165	102	109	132	63
LOC102656142	4	29	22	20	26	10	21	15	7	37	12	59	29	29	38	35	28	30	25	28	16	41	37	16	15	7	10	18	17	12	16	50	59	31	32	61	33	54	26	10	29	7	5	4	4
LOC102656143	0	0	1	0	0	0	0	0	0	0	0	1	0	0	1	0	0	0	0	0	0	0	1	0	0	1	0	0	0	0	0	1	0	0	1	0	0	0	0	0	0	0	0	0	0
LOC102656154	3	5	16	6	25	3	4	4	2	15	8	6	8	5	10	9	9	19	5	19	1	10	12	7	137	32	18	7	5	96	3	11	15	14	114	64	13	59	32	5	10	1	5	83	44
LOC102656160	2	0	0	0	0	0	0	0	0	0	0	0	0	0	0	0	0	0	0	0	0	0	0	1	0	0	0	0	0	0	0	0	0	0	0	0	0	0	0	0	0	0	0	0	0
LOC102656166	93	294	214	238	424	385	414	288	102	321	287	555	542	619	580	655	563	455	523	459	422	478	602	230	474	264	144	152	251	215	600	619	1118	1001	629	919	744	674	452	112	290	174	193	200	145
LOC102656170	0	0	2	2	0	0	0	0	0	0	1	0	1	1	0	0	0	1	0	1	0	0	0	2	0	1	0	3	4	0	0	2	1	1	2	0	0	0	0	2	8	6	6	4	3
LOC102656183	383	1776	810	1047	1379	1094	1214	852	245	982	1323	1540	1142	1233	1097	1391	897	624	818	657	698	1445	997	1000	595	407	223	258	394	272	814	708	1615	1115	925	966	986	1001	544	187	576	245	289	379	235
LOC102656186	50	80	44	69	48	54	43	22	16	56	82	93	61	59	43	52	128	87	40	37	93	52	45	50	47	38	9	16	15	23	63	52	73	133	66	103	134	133	78	11	25	5	12	38	25
LOC102656190	199	281	223	145	152	70	346	174	90	162	191	325	151	251	157	188	221	195	107	70	137	348	201	191	85	83	30	14	75	59	339	117	447	368	157	316	220	293	120	38	48	40	48	70	40
LOC102656197	12	52	45	19	55	28	25	60	8	29	32	86	32	84	46	63	33	22	25	13	20	54	14	21	16	9	8	7	15	3	38	22	75	34	46	75	64	39	30	8	10	6	6	21	4
LOC102656198	0	0	2	0	0	1	1	0	1	0	2	1	3	4	1	0	2	2	1	3	3	0	2	0	2	2	1	2	1	0	0	1	6	6	3	4	2	1	5	2	0	4	4	3	0
LOC102656199	10	87	44	39	69	44	62	54	10	51	34	79	38	71	45	68	34	38	34	39	25	71	44	27	32	9	5	7	16	10	44	40	107	37	46	77	36	56	31	10	25	10	15	18	6
LOC102656215	60	171	98	121	216	105	195	132	62	167	168	291	261	292	188	284	161	104	147	126	117	281	202	158	118	62	31	35	69	46	207	183	274	159	162	182	201	194	109	21	86	51	50	52	29
LOC102656216	1	1	0	0	1	0	0	0	0	0	0	0	0	0	0	1	1	1	0	0	1	0	1	0	0	0	0	0	0	1	0	0	0	1	0	0	1	0	0	0	0	0	0	0	0
LOC102656221	0	2	0	0	0	1	2	0	1	1	0	0	1	5	2	1	0	0	0	0	3	0	0	1	0	0	0	0	0	0	0	0	3	2	0	0	0	2	1	0	1	1	3	0	0
LOC102656224	276	635	548	756	729	850	1002	627	483	791	769	965	1606	1399	838	1024	919	915	939	655	1541	1285	1034	804	522	288	177	287	371	257	1134	1160	1423	937	974	1371	1429	1031	893	156	397	247	290	267	208
LOC102656231	0	0	2	1	0	0	3	2	0	0	1	0	2	0	1	2	0	1	1	3	1	0	0	0	0	0	0	0	1	0	7	2	2	2	3	4	1	0	3	0	0	0	0	1	0
LOC102656244	0	0	2	0	0	0	1	0	0	2	0	2	1	1	0	0	2	1	3	0	2	3	0	1	2	0	1	0	3	2	0	0	4	2	2	3	0	0	0	0	0	0	0	0	1
LOC102656245	0	0	1	0	0	0	0	0	0	0	0	2	0	0	0	0	0	0	0	0	0	0	1	0	0	0	0	0	0	0	0	1	0	0	0	1	0	0	0	0	0	0	0	1	0
LOC102656247	31	214	124	66	220	131	42	57	45	87	71	163	228	73	87	114	71	158	185	146	39	89	75	48	186	86	57	30	110	22	59	73	233	107	125	426	130	113	193	62	62	30	45	33	28
LOC102656248	8	13	17	15	9	31	31	13	3	10	39	12	17	34	37	40	22	24	15	28	25	25	20	21	19	4	3	2	12	9	23	25	82	35	28	50	54	14	37	2	10	2	5	4	4
LOC102656249	38	109	157	172	184	191	152	65	62	161	212	200	243	231	201	179	252	280	225	195	225	224	203	130	229	114	89	99	168	101	81	205	494	365	322	326	226	158	202	99	135	130	190	113	89
LOC102656258	25	102	65	57	110	52	71	52	40	66	73	144	99	101	81	100	78	70	66	58	70	98	73	60	47	27	16	16	24	16	68	66	140	91	70	91	76	95	55	23	65	40	46	29	12
LOC102656263	55	108	115	133	162	211	140	60	100	148	201	234	266	251	166	183	323	280	270	251	296	261	221	137	226	133	75	95	99	121	197	225	483	423	352	345	324	276	230	64	180	65	91	117	72
LOC102656271	0	4	6	9	5	2	5	3	0	5	10	10	7	6	6	6	2	6	1	7	9	10	4	5	3	6	2	0	2	1	9	6	11	9	9	13	3	4	6	1	2	1	1	3	3
LOC102656283	15	68	64	69	112	70	63	50	16	49	64	84	125	76	80	67	113	130	92	132	83	72	52	14	95	34	33	41	69	36	68	142	267	146	183	205	94	61	77	34	76	40	80	49	31
LOC102656287	57	240	126	133	197	169	225	155	61	215	176	255	178	211	182	252	126	112	103	128	91	289	201	164	115	70	46	42	66	38	165	153	247	166	152	189	152	155	95	34	77	31	31	53	38
LOC102656291	54	196	83	100	152	86	127	126	66	152	149	247	156	180	147	192	117	104	115	89	81	231	159	139	99	38	28	17	26	33	161	103	179	117	112	161	147	141	97	17	50	20	20	28	19
LOC102656294	5	16	49	76	34	7	42	14	10	66	103	28	111	84	77	56	65	78	74	39	241	134	59	62	8	12	11	4	7	18	15	150	64	58	87	140	104	8	88	10	4	30	30	0	9
LOC102656311	137	477	219	241	510	308	321	252	89	302	352	448	409	377	378	405	259	209	229	240	172	528	324	291	203	112	47	63	71	91	254	265	453	318	299	376	330	305	218	35	131	56	64	94	60
LOC102656321	3	43	21	4	23	11	35	20	0	19	16	34	19	5	15	41	0	7	5	3	9	37	22	7	16	15	1	5	3	2	50	0	79	37	4	16	17	21	28	0	6	7	0	11	6
LOC102656326	1	1	1	1	3	1	1	3	0	1	4	1	5	2	1	2	3	2	4	3	6	4	0	3	2	2	1	0	2	3	3	3	7	6	2	9	4	6	5	2	0	2	6	1	2
LOC102656334	0	1	1	2	2	0	2	1	0	0	0	2	3	2	6	3	0	2	0	0	0	0	1	1	0	0	1	1	0	0	1	5	3	2	1	3	1	3	0	1	1	0	0	0	0
LOC102656337	10	28	17	17	20	10	19	17	10	16	19	25	21	26	10	16	13	13	14	20	12	15	23	16	16	15	7	6	11	6	10	19	32	36	16	27	24	27	16	3	10	6	3	7	5
LOC102656349	3	4	4	2	3	1	1	2	0	1	1	1	0	4	4	3	2	0	8	2	3	0	1	4	1	0	0	0	3	0	2	2	9	3	4	13	2	4	4	2	1	2	2	3	3
LOC102656354	7395	10436	8847	8971	14053	8455	10582	6736	5300	7664	13053	8099	12065	9053	8581	10147	13260	7220	8349	6105	8610	9212	8867	7830	5276	3797	2149	2004	3238	2948	13699	5488	15381	9319	7886	8966	11919	16543	5922	2014	4456	1982	2214	3311	2507
LOC102656356	0	1	1	0	0	1	1	0	0	0	1	0	1	0	1	1	0	1	0	0	0	3	2	0	3	0	0	0	0	0	1	0	0	2	0	0	0	0	0	1	0	0	1	2	0
LOC102656360	51	154	83	103	237	91	126	103	50	177	121	310	231	233	242	247	229	153	185	149	160	274	164	94	151	64	38	50	67	86	150	253	331	294	204	445	259	176	167	32	85	31	34	51	39
LOC102656369	15	58	95	39	65	46	82	57	35	61	80	84	116	126	104	108	123	120	121	86	112	89	85	55	104	70	44	48	70	65	120	138	219	201	173	216	178	144	118	29	77	39	49	63	27
LOC102656371	0	0	0	0	0	0	0	0	0	0	1	0	0	0	0	0	0	1	0	1	2	0	0	0	0	0	2	0	0	1	0	0	0	1	1	0	0	0	0	0	0	0	0	0	0
LOC102656384	22	88	58	68	106	80	99	68	38	56	73	111	117	131	80	122	108	87	92	79	76	54	59	39	71	56	28	28	58	40	130	83	200	99	104	169	139	165	71	25	61	29	46	33	28
LOC102656395	0	21	4	9	13	15	10	5	1	9	4	23	12	17	12	12	11	5	14	11	2	16	16	8	8	4	1	5	6	4	6	9	17	12	9	14	11	23	5	0	6	2	1	7	6
LOC102656397	4	14	12	9	8	5	11	6	3	1	4	20	9	16	14	14	15	10	7	7	8	13	11	4	20	6	2	3	6	3	13	11	34	11	8	25	19	19	13	1	6	1	1	2	2
LOC102656398	29	33	29	28	26	38	52	47	12	28	31	57	55	39	39	76	38	49	32	37	28	35	51	25	34	17	6	16	9	9	99	48	68	53	39	47	57	65	33	6	16	8	8	17	19
LOC102656403	70	131	111	71	65	64	162	100	105	87	183	157	139	181	141	150	154	147	68	63	84	161	141	130	153	83	30	36	54	65	221	178	362	261	171	305	232	303	131	30	57	27	45	70	51
LOC102656425	42	170	103	114	184	119	150	140	20	126	191	208	191	235	171	217	122	75	88	91	97	249	143	118	92	44	18	32	36	31	137	88	201	137	129	141	137	114	79	24	43	23	21	48	21
LOC102656429	30	100	81	118	130	99	92	39	59	67	108	130	103	96	77	66	129	82	102	107	75	111	130	79	75	48	31	34	39	43	73	97	202	149	116	105	139	133	89	47	81	26	42	44	28
LOC102656433	21	63	50	64	61	74	74	60	10	76	82	97	113	104	102	116	74	82	63	92	73	100	96	37	57	33	19	27	35	27	93	91	176	114	119	173	99	80	83	17	48	28	25	29	25
LOC102656439	33	50	32	52	53	55	106	28	21	44	56	88	63	66	63	117	78	57	75	72	61	143	67	34	40	36	20	36	46	23	104	60	475	85	71	136	90	85	68	38	54	58	83	30	24
LOC102656442	43	78	79	64	82	97	95	72	85	77	83	114	67	124	88	112	71	75	60	60	65	117	76	72	56	48	20	26	48	29	117	88	198	112	69	114	89	117	61	25	63	23	32	57	13
LOC102656444	16	75	34	54	72	44	66	39	16	55	45	95	68	93	72	92	61	60	65	70	39	74	45	42	32	28	10	16	23	33	64	55	91	87	63	122	106	95	62	13	44	18	18	34	11
LOC102656448	710	2035	1441	2718	2130	4349	3752	1837	1501	3334	3926	4264	8349	5174	3522	4706	9118	8003	5855	4594	7138	6613	5711	4239	3451	1126	684	874	500	1192	4252	5328	11147	6308	8778	3753	7918	6721	8091	350	1327	334	563	610	588
LOC102656452	0	3	6	1	2	2	1	1	1	1	8	0	2	1	1	0	9	2	7	2	6	1	2	0	3	4	2	2	4	0	1	1	10	2	8	6	6	5	0	0	9	3	8	6	0
LOC102656461	0	0	0	0	0	0	0	0	0	0	0	0	1	0	0	0	0	0	0	0	0	0	0	1	0	0	0	0	0	0	0	0	0	0	0	0	0	0	0	0	0	0	0	0	0
LOC102656464	1	5	5	3	6	11	2	1	1	16	2	9	11	3	7	3	9	7	1	4	3	11	4	4	3	1	1	1	3	6	6	2	17	13	6	6	4	6	3	4	2	2	1	1	3
LOC102656465	11	35	51	58	66	39	34	14	19	56	70	54	69	59	54	43	89	111	92	87	96	66	42	22	69	20	31	33	35	41	9	100	261	146	141	136	54	19	94	12	42	34	30	47	42
LOC102656473	2	5	7	4	5	7	8	8	1	5	11	7	8	6	6	4	3	11	2	5	5	9	7	1	7	6	3	3	4	3	8	8	19	11	7	11	9	5	13	3	3	2	2	4	1
LOC102656479	0	0	0	0	0	1	0	0	0	0	1	0	0	1	0	0	0	0	0	0	0	0	0	0	0	0	0	0	0	0	3	0	1	0	1	1	0	0	0	0	0	0	0	0	0
LOC102656485	26	91	60	67	91	62	127	75	15	92	85	148	193	137	61	143	105	79	78	55	100	228	112	90	63	36	9	7	20	18	113	75	146	69	88	86	87	91	64	2	27	21	19	16	7
LOC102656489	1	0	0	0	1	1	0	0	0	1	0	0	1	0	0	0	1	0	0	0	3	0	0	0	0	0	0	0	0	0	0	0	0	0	1	0	0	0	0	0	0	0	1	0	0
LOC102656490	2	4	9	11	7	6	2	2	6	7	10	6	7	14	7	5	8	4	3	9	13	12	2	3	8	5	2	1	3	1	0	11	19	18	16	16	7	5	11	3	0	2	3	4	4
LOC102656491	68	266	184	172	205	190	257	205	45	156	182	328	216	289	244	283	208	147	245	168	141	204	207	222	160	108	58	57	99	54	260	210	500	379	259	356	282	269	209	44	161	54	100	112	49
LOC102656492	83	108	99	78	161	136	265	151	112	72	101	165	294	211	138	206	212	168	260	199	114	157	163	69	167	69	37	51	61	81	504	250	566	372	227	254	199	348	163	37	107	66	64	121	47
LOC102656497	0	0	0	0	0	1	4	1	0	0	0	1	0	6	0	4	6	0	0	0	2	0	2	0	1	0	0	0	0	2	4	2	5	3	5	4	2	0	0	0	0	4	1	4	2
LOC102656501	31	101	141	187	120	119	113	16	40	150	257	147	225	203	148	105	215	319	183	258	261	186	143	85	238	49	77	84	126	103	26	236	431	381	327	362	187	44	227	90	80	130	153	121	103
LOC102656504	42	169	72	85	129	56	105	77	60	90	85	236	140	145	157	150	129	94	113	102	80	175	137	88	115	95	46	45	56	48	180	150	361	239	176	281	196	297	151	40	108	34	44	49	35
LOC102656505	2	4	2	1	2	1	2	2	1	0	1	0	1	0	1	3	1	2	1	3	6	0	1	0	1	0	1	0	2	0	1	2	11	6	3	6	0	3	0	1	0	0	0	2	1
LOC102656529	128	409	235	230	398	293	414	329	216	345	282	580	469	622	519	691	537	318	372	332	329	750	502	346	356	223	76	122	152	149	460	478	707	518	475	638	667	562	342	57	275	99	106	121	111
LOC102656541	79	272	146	157	304	171	251	175	141	209	219	395	269	313	336	406	221	169	200	166	156	320	239	166	213	101	70	69	114	118	249	226	438	313	273	377	269	328	180	44	171	52	84	91	75
LOC102656548	9	12	26	17	35	6	22	9	15	29	32	24	20	18	17	12	12	16	13	14	27	24	7	10	8	7	8	8	8	9	23	19	39	29	31	20	14	26	16	11	11	9	7	23	7
LOC102656552	42	46	32	41	48	62	48	55	21	42	78	69	52	49	60	69	69	77	40	26	45	63	67	75	27	16	11	8	14	14	59	73	102	56	39	86	111	88	59	8	34	22	19	17	8
LOC102656554	0	0	0	0	1	0	0	0	0	1	0	2	3	1	1	0	4	3	2	1	2	1	1	0	1	0	0	0	1	0	0	0	3	1	0	1	2	1	3	0	0	0	0	0	2
LOC102656560	0	0	0	0	0	0	1	0	0	0	0	0	0	0	0	0	1	0	0	0	0	0	0	0	0	0	0	0	0	0	1	1	1	1	0	0	0	0	0	0	1	0	0	0	0
LOC102656567	0	3	1	0	3	1	2	0	2	1	2	0	0	0	1	1	0	1	4	2	2	1	0	0	2	2	1	0	3	2	2	0	2	1	0	0	1	0	0	3	1	1	8	1	2
LOC102656570	1	49	13	8	4	1	41	196	0	4	1	7	0	10	56	111	0	1	7	4	33	1	93	52	5	3	1	0	1	0	10	20	652	443	3	2	8	2	22	2	2	2	1	2	0
LOC102656577	147	324	197	160	397	160	311	223	138	237	182	579	337	376	358	481	167	131	196	174	132	447	264	153	141	121	42	47	75	87	312	253	446	288	221	411	227	251	159	63	122	55	71	103	48
LOC102656579	25	99	51	41	66	56	62	68	31	62	68	89	64	87	67	84	45	41	34	32	38	73	59	37	41	24	14	16	18	21	44	41	113	58	44	106	64	56	50	6	20	6	9	22	9
LOC102656583	114	99	179	105	292	137	92	53	98	242	230	256	381	165	33	108	417	337	322	287	368	269	224	159	101	14	5	6	39	41	275	343	865	620	287	524	340	334	335	16	71	9	21	25	12
LOC102656585	248	276	487	406	535	305	363	92	286	500	700	259	731	548	461	331	933	758	533	519	877	575	470	299	489	179	192	187	244	308	200	614	1230	876	870	1042	826	371	588	164	308	111	140	338	306
LOC102656587	51	184	125	113	192	108	141	80	69	172	156	216	134	180	160	154	184	134	142	117	103	208	170	106	178	67	54	55	66	74	110	186	319	248	177	259	229	183	150	48	114	65	81	67	51
LOC102656594	149	303	449	446	430	326	374	106	177	330	547	447	487	555	419	306	768	645	558	459	717	458	398	309	517	286	188	202	321	291	236	535	1282	800	794	839	662	521	616	213	275	187	280	235	239
LOC102656595	1	0	3	3	8	3	6	3	0	0	2	5	1	6	0	2	1	1	3	4	2	4	0	0	1	0	0	0	0	1	3	1	9	4	0	4	1	6	4	0	0	0	1	0	0
LOC102656611	0	0	0	0	0	0	0	0	0	0	0	0	0	0	0	0	0	1	0	0	0	0	0	0	0	1	0	0	0	0	1	0	0	0	0	0	0	0	0	0	0	1	0	0	0
LOC102656618	188	498	617	616	730	1215	763	184	347	702	955	507	1038	1164	655	561	1386	1445	913	902	1488	971	662	661	959	284	213	466	441	399	280	1014	2001	1959	1051	1404	1510	489	1001	263	413	211	384	333	277
LOC102656620	27	59	71	57	101	66	89	78	36	61	65	88	130	125	122	121	147	119	130	130	82	79	84	22	109	39	40	32	72	44	116	193	275	192	199	288	160	167	124	51	96	60	62	51	30
LOC102656637	1	2	0	1	2	5	1	1	0	2	1	2	0	0	4	2	2	2	3	0	2	4	1	0	2	1	0	0	1	1	7	0	2	0	0	1	2	4	0	0	4	0	1	0	0
LOC102656639	1	2	3	1	4	5	1	1	2	2	6	0	5	4	1	1	7	16	6	13	16	2	1	1	4	1	3	3	1	3	1	11	24	10	12	9	1	2	2	14	1	7	23	1	3
LOC102656640	0	0	0	0	0	0	1	0	0	0	1	0	0	0	0	0	0	0	0	0	0	0	0	2	0	0	0	0	0	0	0	0	0	0	0	0	0	0	0	0	0	0	1	0	0
LOC102656645	7	23	12	7	25	16	24	26	9	19	21	43	18	34	20	31	26	17	19	15	5	11	17	16	14	15	7	5	8	9	13	19	44	16	25	25	37	18	16	4	10	10	7	12	5
LOC102656652	359	485	505	423	454	480	478	251	182	342	536	577	509	444	407	429	537	507	428	384	365	519	415	453	345	264	147	186	206	194	378	384	1013	641	560	495	584	787	335	103	285	129	176	201	147
LOC102656656	90	84	143	212	236	260	126	38	161	119	360	69	303	178	170	125	507	390	355	381	361	210	209	94	270	108	93	124	220	161	79	286	574	683	469	353	260	176	262	117	137	148	262	147	161
LOC102656657	65	175	63	86	146	99	164	127	67	91	133	175	128	141	117	153	102	65	74	73	59	119	114	66	87	40	21	28	32	29	170	84	157	134	95	158	115	158	77	21	40	18	27	39	23
LOC102656661	44	59	92	61	46	34	60	36	31	50	86	22	52	59	77	63	120	149	85	123	157	84	64	33	129	52	41	23	48	71	91	130	329	176	140	151	130	95	143	40	27	27	49	45	76
LOC102656664	1	2	4	0	2	1	3	4	1	5	0	1	5	1	1	2	2	4	2	7	2	2	8	1	3	1	6	1	1	1	4	2	2	4	12	9	2	4	3	5	2	3	9	1	2
LOC102656669	0	0	0	0	0	0	0	0	1	0	0	0	0	0	0	0	0	0	0	0	0	0	0	0	0	0	0	0	0	0	0	0	0	0	0	0	0	0	0	0	0	0	0	0	0
LOC102656685	126	475	250	322	506	413	431	303	103	329	395	515	524	511	373	573	262	239	310	309	304	527	431	331	255	138	52	71	114	126	517	244	680	379	372	404	359	402	257	56	160	51	66	135	75
LOC102656719	4	4	1	3	1	1	5	2	1	3	2	2	3	1	1	2	0	1	1	1	3	2	3	0	2	1	0	0	1	0	0	1	3	3	2	2	5	3	3	1	3	0	2	1	2
LOC102656725	27	120	47	61	79	55	112	62	12	92	80	108	93	111	92	118	74	49	50	50	45	170	106	79	38	22	15	11	9	17	86	44	71	51	58	110	84	68	31	3	27	6	11	18	9
LOC102656730	0	4	0	0	0	0	2	0	0	0	0	0	1	2	0	0	1	0	0	0	0	0	2	0	1	0	0	0	0	0	0	0	0	0	1	0	0	0	0	0	1	0	0	0	0
LOC102656732	0	0	0	1	0	2	0	0	0	0	0	0	0	1	0	0	0	0	0	0	0	0	0	0	0	0	0	0	0	0	0	2	1	3	1	1	0	0	1	2	0	0	0	0	0
LOC102656733	10	43	23	19	32	17	31	22	5	32	27	49	45	32	27	49	30	23	26	18	26	61	37	28	25	19	9	19	15	9	41	57	85	46	38	68	41	36	20	9	28	10	12	17	12
LOC102656738	0	2	2	0	0	1	0	1	0	1	1	0	1	0	1	1	1	0	0	0	3	0	0	0	2	0	0	0	0	0	0	2	1	4	0	3	0	1	0	0	2	0	0	2	0
LOC102656747	2	0	1	1	2	0	0	0	2	1	2	0	0	0	0	0	2	1	0	0	1	0	3	0	0	2	0	2	1	0	4	0	1	4	0	0	1	2	0	2	2	10	8	2	0
LOC102656757	0	0	0	0	0	0	0	0	0	0	1	0	0	0	0	0	0	0	0	0	0	0	0	0	0	0	0	0	0	0	0	0	0	0	0	0	0	0	0	0	0	0	0	0	0
LOC102656758	6	48	20	36	37	30	26	15	1	19	23	33	44	37	33	31	39	18	17	18	15	59	38	42	15	10	5	13	15	8	22	14	38	33	19	27	38	21	29	7	11	5	5	9	9
LOC102656766	5	9	205	12	391	17	6	10	17	96	14	353	28	662	6	17	472	19	15	19	31	8	9	147	17	10	27	1	9	9	802	18	67	23	239	32	27	981	16	6	10	10	7	158	10
LOC102656779	4	23	14	24	25	28	21	15	13	31	26	53	27	44	27	31	21	24	37	38	25	48	39	23	22	11	7	2	20	8	32	35	54	47	49	41	37	31	31	8	14	6	13	7	4
[truncated: 7,935 more rows]
