# Supplementary material for: Transcriptomic Responses Underlying the High Virulence of Black Queen Cell Virus and Sacbrood Virus following a Change in Their Mode of Transmission in Honey Bees (Apis mellifera)
Source: Viruses. 2023 May 30;15(6):1284. doi: 10.3390/v15061284 (PMC10303220; doi:10.3390/v15061284)
Supplement: Supplementary file 1 [file viruses-15-01284-s001.zip › Table S3_mapping rates_RJP.xlsx]

## Sheet: Sheet1
Table S3. Information about the analyzed RNA-Seq samples
Sample name	lib	init_reads	filter_reads	effec_reads	number of reads mapped to the host (A.mellefera)	% mapping to host	number of reads mapped toBQCV	% mapping to BQCV	CzechSBV	GermanSBV	SwedishSBV	number of reads mapped to SBV_total	% mapping to SBV_total	number of reads mapped to DWV (A&B)	% mapping to DWV (A&B)	number of unmapped reads	% unmapped reads	notes
Control	C1	17572236	7286484	4198847	3974360	94.6536	3491	0.0831419	11111	7140	48	18299	0.43581	4102	0.0976935	198595	4.72975	initi_reads: total number of single reads obtained from the company
Control	C2	29061010	23711538	14494502	13979119	96.4443	11350	0.0783056	26690	14254	111	41055	0.283245	4839	0.0333851	458139	3.16078	filter_reads: total number of single reads that passed quality control
Control	C3	23236022	16004208	9809120	9387442	95.7012	8324	0.0848598	13139	8490	42	21671	0.220927	12556	0.128003	379127	3.86505	effec_reads: total number of reads after merging that are used in analyis
Control	C4	26007110	19108670	11854764	11409308	96.2424	6646	0.0560618	15737	6156	47	21940	0.185073	245	0.00206668	416625	3.51441
Control	C5	29376526	22463928	13756869	13248868	96.3073	8036	0.0584145	7921	5107	30	13058	0.0949199	6554	0.0476417	480353	3.49173
Control	C6	29579754	21254138	13061677	12155094	93.0592	10581	0.081008	10797	6159	28	16984	0.130029	2214	0.0169504	876804	6.7128
Control	C7	28520072	22118868	13673995	13191934	96.4746	7726	0.0565014	12649	8298	34	20981	0.153437	167	0.0012213	453187	3.31423
Control	C8	26300966	19291376	11631137	11293758	97.0993	7702	0.0662188	12552	9639	47	22238	0.191194	3418	0.0293866	304021	2.61385
Control	C9	20893690	10618122	5783962	5503887	95.1577	4118	0.0711969	7348	3598	15	10961	0.189507	13472	0.23292	251524	4.34865
															#DIV/0!
FPF	FPF1	23483438	16988012	10508755	10121996	96.3196	748	0.00711787	4314	1958	14	6286	0.0598168	105	0.000999167	379620	3.61242
FPF	FPF2	34949716	20757004	12781508	12230235	95.6869	10427	0.0815788	10432	5474	47	15953	0.124813	21853	0.170974	503040	3.93569
FPF	FPF3	29688608	26978304	17103342	16438021	96.11	10211	0.0597018	20557	8560	71	29188	0.170657	8938	0.0522588	616984	3.60739
FPF	FPF6	33157300	30192992	19775175	19071295	96.4406	15557	0.0786693	15468	8996	35	24499	0.123888	13473	0.0681309	650351	3.28872
FPF	FPF7	29056966	26481246	16995544	16391672	96.4469	11123	0.0654466	16756	10438	56	27250	0.160336	8559	0.0503603	556940	3.27698
FPF	FPF8	27432712	24793222	16024694	15368272	95.9037	52835	0.32971	67100	46585	245	113930	0.710965	12371	0.0771996	477286	2.97844
FPF	FPF9	32176898	29011140	18326594	17705030	96.6084	7367	0.0401984	11035	5693	33	16761	0.0914573	24811	0.135382	572625	3.12456
															#DIV/0!
BQCV/SBV-feeding	VF1	26776502	23632234	15221527	14592473	95.8673	15103	0.0992213	21042	13005	62	34109	0.224084	10672	0.0701112	569170	3.73924
BQCV/SBV-feeding	VF2	24950846	20714350	12996145	12437735	95.7033	21151	0.162748	24582	15505	70	40157	0.308992	18442	0.141904	478660	3.68309
BQCV/SBV-feeding	VF3	19280302	16734136	10688987	7219142	67.5381	407321	3.81066	2720129	7383	1646	2729158	25.5324	89	0.000832633	333277	3.11795
BQCV/SBV-feeding	VF4	23727306	21349348	14140171	13580367	96.041	10122	0.0715833	14620	7573	47	22240	0.157282	5351	0.0378425	522091	3.69225
BQCV/SBV-feeding	VF5	26532632	23807916	15266015	14684022	96.1877	9545	0.0625245	12392	5844	34	18270	0.119678	1630	0.0106773	552548	3.61946
BQCV/SBV-feeding	VF6	24810022	20130694	12498692	11942130	95.547	16160	0.129294	21557	14241	76	35874	0.287022	6477	0.0518214	498051	3.98482
BQCV/SBV-feeding	VF7	28391326	25901866	16770355	16042853	95.662	33169	0.197784	62407	41933	191	104531	0.623308	504	0.0030053	589298	3.51393
BQCV/SBV-feeding	VF8	23469054	21059848	13568230	13003490	95.8378	15796	0.116419	25550	20287	52	45889	0.338209	25074	0.184799	477981	3.5228
BQCV/SBV-feeding	VF9	23714764	17685500	11037669	10607073	96.0989	4182	0.0378884	9249	3582	19	12850	0.11642	11895	0.107767	401669	3.63907
															#DIV/0!
BQCV/SBV-feeding + FPF	VF+FPF1	30103160	27171196	16744823	16126013	96.3045	17755	0.106033	27765	16469	103	44337	0.26478	5685	0.0339508	551033	3.29077
BQCV/SBV-feeding + FPF	VF+FPF2	25476412	23122990	15001716	14423900	96.1483	24371	0.162455	29785	18323	102	48210	0.321363	14192	0.0946025	491043	3.27325
BQCV/SBV-feeding + FPF	VF+FPF3	49372098	43282882	27561532	26461830	96.01	20448	0.0741904	51017	22998	170	74185	0.269161	109	0.000395479	1004960	3.64624
BQCV/SBV-feeding + FPF	VF+FPF4	34210944	31094236	20381882	19550271	95.9199	16923	0.0830296	26187	14822	144	41153	0.20191	9612	0.0471595	763923	3.74805
BQCV/SBV-feeding + FPF	VF+FPF5	36768970	33806360	21875161	17527569	80.1254	27670	0.12649	3371402	261759	2012	3635173	16.6178	4243	0.0193964	680506	3.11086
BQCV/SBV-feeding + FPF	VF+FPF6	35404648	32440574	21027305	20278617	96.4394	15593	0.074156	33885	19335	87	53307	0.253513	144	0.000684824	679644	3.2322
BQCV/SBV-feeding + FPF	VF+FPF7	32420832	28498516	17895898	17213756	96.1883	15065	0.0841813	30057	18752	101	48910	0.273303	5010	0.0279952	613157	3.42624
BQCV/SBV-feeding + FPF	VF+FPF8	33375326	28553034	17428404	16532606	94.8601	10583	0.0607227	29572	158604	86	188262	1.0802	31960	0.183379	664993	3.81557
BQCV/SBV-feeding + FPF	VF+FPF9	22974592	20648420	13377989	12845362	96.0186	12788	0.0955899	26414	18555	111	45080	0.336971	4228	0.0316042	470531	3.5172
															#DIV/0!
BQCV/SBV-Injection	VI1	33013538	29765192	19198794	11416484	59.4646	749084	3.90172	4522086	2050697	8917	6581700	34.2818	176	0.000916724	451350	2.35093
BQCV/SBV-Injection	VI2	29151748	25698236	16302179	5783278	35.4755	3433508	21.0617	4228485	2566901	17616	6813002	41.792	11195	0.0686718	261196	1.60222
BQCV/SBV-Injection	VI3	23778768	20940468	13311815	3637677	27.3267	2714134	20.3889	4544375	2200527	12101	6757003	50.7594	13544	0.101744	189457	1.42322
BQCV/SBV-Injection	VI4	24485356	21843616	13969824	3960702	28.3518	3552918	25.4328	3623812	2529274	8206	6161292	44.1043	91731	0.656637	203181	1.45443
BQCV/SBV-Injection	VI6	32659918	30136966	19690333	5813721	29.5258	3273765	16.6263	6055354	4226379	16578	10298311	52.3014	13911	0.0706489	290625	1.47598
BQCV/SBV-Injection	VI9	27408070	22405032	13677323	4756657	34.7777	1232828	9.01366	4168497	3237374	23062	7428933	54.3157	7903	0.0577818	251002	1.83517
															#DIV/0!
BQCV/SBV-Injection + FPF	VI+FPF	22848308	20896840	12911736	3151180	24.4055	2135191	16.5368	4725306	2704908	19922	7450136	57.7005	7684	0.0595117	167545	1.29762
BQCV/SBV-Injection + FPF	VI+FPF	30425348	28140362	18265286	7230849	39.5879	4404058	24.1116	3770911	2460789	19211	6250911	34.2229	49726	0.272243	329742	1.80529
BQCV/SBV-Injection + FPF	VI+FPF	28343062	26237666	16839498	4123884	24.4894	3430131	20.3696	5283490	3753748	19332	9056570	53.7817	10973	0.0651623	217940	1.29422
BQCV/SBV-Injection + FPF	VI+FPF	30193754	27616738	17799091	5523210	31.0309	3778108	21.2264	5076867	3136542	12795	8226204	46.217	6019	0.0338163	265550	1.49193
BQCV/SBV-Injection + FPF	VI+FPF	35158026	31906728	20006176	6036726	30.1743	4573169	22.8588	5363252	3690979	17177	9071408	45.343	10183	0.0508993	314690	1.57296
BQCV/SBV-Injection + FPF	VI+FPF	20043144	16355402	10354074	4075125	39.3577	1666687	16.0969	2579394	1797519	8865	4385778	42.358	19683	0.190099	206801	1.99729
	Average	SD
Number of mRNA reads in sequenced liberaries	1.51215e+07	4.17832e+06
mRNA reads mapped to SBV in VI	46.26	7.61
mRNA reads mapped to SBV in VI+FPF	46.6	8.34
mRNA reads mapped to BQCV in VI	16.07	8.12
mRNA reads mapped to BQCV in VI+FPF	20.2	3.28
Uncharacterized/unmapped reads	3.1	1.06
